# Supplementary material for: The BnGRF2 gene (GRF2-like gene from Brassica napus) enhances seed oil production through regulating cell number and plant photosynthesis
Source: PubMed Central journal article supplement — J Exp Bot. 2012 Mar 21;63(10):3727–40. doi: 10.1093/jxb/ers066 (PMC3388832; doi:10.1093/jxb/ers066), 2012-03-21
Supplement: supp_ers066_00072942-file001.pdf [file supp_ers066_00072942-file001.pdf]

**Table S1. Primers used for gene isolation, expression vector confirmation and real-time PCR in this study.**

| Primer name    | Primer                                               |                | Reverse primer                                      |
|----------------|------------------------------------------------------|----------------|-----------------------------------------------------|
| BnGRF2aRTf     | 5'-AAGCTCGAAGCTAGCTAGA-3'                            | BnGRF2aRTr     | 5'-CAATAAGGAGGTGGAAGCT-3'                           |
| BnGRF2bRTf     | 5'-TCTGAAAGAAGACAGATCCG-3'                           | BnGRF2bRTr     | 5'-CACAAATATTGAGGTGGGAAC-3'                         |
| BnGRF2aF       | 5'-ATGGATCTTGGGTCGGTAACT-3'                          | BnGRF2aR       | 5'-TCAGGTTGTGTAATGAAAGTA-3'                         |
| BnGRF2bF       | 5'-ATGGATACTGGGACTCATGT-3'                           | BnGRF2bR       | 5'-TCAGGTAGTGTAACGGAAGT-3'                          |
| Bnactin2F      | 5'-TGTCGCTATCCAAGCTGTTCT-3'                          | Bnactin2R      | 5'-ACCTTGCTGGACTTGACCT-3'                           |
| Bnactin3F      | 5'-ATGGCCGATGGTGAGGACATTC-3'                         | Bnactin3R      | 5'-GGTGCACCACCTTGATCTTC-3'                          |
| Atactin1F      | 5'-CCATGAAACCACCTATAACTCC-3'                         | Atactin1R      | 5'-TACTCTGCCTTTGCGATCCAC-3'                         |
| AtUBQ10F       | 5'-GGCCTTGATAATCCCTGATGAATAA<br>G-3'                 | AtUBQ10R       | 5'-AAAGAGATAACAGGAACGGAAACATA<br>GT-3'              |
| AtGRF2RTf      | 5'-AGCAATGCCCGTGCATCAAG-3'                           | AtGRF2RTr      | 5'-AGAATTGTGATTGTGATTCC-3'                          |
| BnGRF2aSmaI    | 5'-TAGCC <u>CCGGG</u> GATGGATCTTGGGTCGG<br>TAACT -3' | BnGRF2aBamHI   | 5'-GTCAG <u>GATCC</u> TCAGGTTGTGTAATGAA<br>AGTA -3' |
| at4g26890qRT-F | 5'-AGCTTACTTGATTGGGATACGGA-3'                        | at4g26891qRT-R | 5'-TTCTTTATGTTTCTCGCCTCT-3'                         |
| at5g25380qRT-F | 5'-GCGGTGCTCAAGGATGTGACTA-3'                         | at5g25381qRT-R | 5'-CGCCATCCACATCTACCAAA-3'                          |
| at2g05100qRT-F | 5'-CTATGTTGGGTGCTCTCGGATGC-3'                        | at2g05100qRT-R | 5'-CGCGTGGATCAAGTTAGGGTT-3'                         |
| at5g54190qRT-F | 5'-TGACGAAGTCGGGAGTGATTG-3'                          | at5g54191qRT-R | 5'-TCGCTGACTTCCCAAACCTCTACG-3'                      |
| at4g01950qRT-F | 5'-CGGGAGAGAAATGAAAGTCGT-3'                          | at4g01951qRT-R | 5'-TGAAGGAAGTGATGCCAATAACA-3'                       |
| at5g56100qRT-F | 5'-GTGGCCGAGAGATTGGTAT-3'                            | at5g56101qRT-R | 5'-AAGAAGAAGAGTAATCCCGAGAA-3'                       |
| M13            | 5'-GACGTTGTAACGACGGCC-3'                             |                |                                                     |
| pCaMVp         | 5'-CCACGTCTTCAAAGCAAGTGGATTGATG-3'                   |                |                                                     |
| NapinP         | 5'-GCATGCATTATTACACGTGATC -3'                        |                |                                                     |
| AD1            | 5'-NGTCGASWGANAWGAA-3'                               |                |                                                     |
| AD2            | 5'-TGWGNAGSANCASAGA-3'                               |                |                                                     |
| LBR1           | 5'-TCCGGTCCTGCCCGTCAC-3'                             |                |                                                     |
| LBR2           | 5'-TGGCAGCTGGACTTCAGC-3'                             |                |                                                     |
| LBR3           | 5'-AACTGGCATGACGTGGGT-3'                             |                |                                                     |

**Table S6. Phenotype comparisons between transgenic *Arabidopsis* lines overexpressing *BnGRF2a* and *AtGRF*.**

| Transgenic line       | Leaf area | Cell number | Chlorophyll content | Fertility                       | Photosynthetic efficiency | Seed size |
|-----------------------|-----------|-------------|---------------------|---------------------------------|---------------------------|-----------|
| 35S- <i>AtGRF1</i>    | Increase  | No change   | No phenotype        | Partially sterile (early stage) | No phenotype              | No data   |
| 35S- <i>AtGRF2</i>    | Increase  | No change   | No phenotype        | Partially sterile (early stage) | No phenotype              | No data   |
| 35S- <i>AtGRF5</i>    | Increase  | Increase    | No phenotype        | No data                         | No phenotype              | No data   |
| 35S- <i>BnGRF2a</i>   | Increase  | Increase    | Increase            | Nearly sterile (all stages)     | Increase                  | Increase  |
| Napin- <i>BnGRF2a</i> | Increase  | Increase    | Increase            | No change                       | No data                   | Increase  |

Note: *AtGRF* transgenic data come from Kim *et al.*, 2003, Horiguchi *et al.*, 2005 and Liu *et al.*, 2009.

**Table S5. Upregulated genes that were thought to be involved in possible BnGRF2-regulated pathways.**

| ProbeName    | Common name | Log2 Ratio | Description                                                                                     |
|--------------|-------------|------------|-------------------------------------------------------------------------------------------------|
| A_84_P825596 | AT1G15570.1 | 0.750728   | CYCA2;3 (CYCLIN A2;3); cyclin-dependent protein kinase regulator                                |
| A_84_P860518 | AT1G69710.1 | 1.015471   | zinc finger protein, putative / regulator of chromosome condensation (RCC1) family protein      |
| A_84_P17338  | AT2G44740.1 | 0.863449   | CYCP4;1 (cyclin p4;1); cyclin-dependent protein kinase                                          |
| A_84_P11833  | AT3G53830.1 | 0.690052   | regulator of chromosome condensation (RCC1) family protein / UVB-resistance protein-related     |
| A_84_P13779  | AT4G03270.1 | 0.798016   | CYCD6;1 (CYCLIN D6;1); cyclin-dependent protein kinase                                          |
| A_84_P21415  | AT4G26890.1 | 0.910722   | MAPKKK16 (Mitogen-activated protein kinase kinase kinase 16); kinase                            |
| A_84_P550382 | AT5G10440.1 | 0.807957   | CYCD4;2 (CYCLIN D4;2); cyclin-dependent protein kinase                                          |
| A_84_P21554  | AT5G25380.1 | 1.37182    | CYCA2;1 (CYCLIN A2;1); cyclin-dependent protein kinase regulator                                |
| A_84_P14940  | AT5G27620.1 | 0.847274   | CYCH;1 (CYCLIN H;1); cyclin-dependent protein kinase/ protein binding / protein kinase          |
| A_84_P856356 | AT5G40770.1 | 0.680897   | ATPHB3 (PROHIBITIN 3)                                                                           |
| A_84_P809013 | AT1G15820.1 | 0.690442   | LHCB6 (LIGHT HARVESTING COMPLEX PSII); chlorophyll binding                                      |
| A_84_P862462 | AT1G20780.1 | 0.711939   | armadillo/beta-catenin repeat protein-related / U-box domain-containing protein                 |
| A_84_P21874  | AT1G27730.1 | 2.457069   | STZ (SALT TOLERANCE ZINC FINGER); nucleic acid binding / transcription factor/ zinc ion binding |
| A_84_P271630 | AT1G44446.1 | 0.746487   | CH1 (CHLOROPHYLL B BIOSYNTHESIS); chlorophyllide a oxygenase                                    |
| A_84_P855512 | AT1G68190.1 | 0.712121   | zinc finger (B-box type) family protein                                                         |
| A_84_P808697 | AT2G05100.1 | 0.852797   | LHCB2.1 (Photosystem II light harvesting complex gene 2.1); chlorophyll binding                 |
| A_84_P22960  | AT2G28000.1 | 0.665835   | CPN60A (chloroplast / 60 kDa chaperonin alpha subunit)                                          |
| A_84_P230129 | AT3G09490.1 | 0.736507   | chloroplast lumen common family protein                                                         |
| A_84_P24021  | AT3G27690.1 | 0.671453   | LHCB2:4 (Photosystem II light harvesting complex gene 2.3)                                      |
| A_84_P810430 | AT3G47470.1 | 0.76786    | LHCA4 (Photosystem I light harvesting complex gene 4)                                           |
| A_84_P573310 | AT4G01330.1 | 0.988501   | protein kinase family protein                                                                   |
| A_84_P267250 | AT5G44190.1 | 1.156973   | GLK2 (GOLDEN2-LIKE 2)                                                                           |
| A_84_P119582 | AT5G48490.1 | 1.338158   | protease inhibitor/seed storage/lipid transfer protein (LTP) family protein                     |
| A_84_P11230  | AT5G54190.1 | 1.315727   | PORA (Protochlorophyllide reductase A); oxidoreductase/ protochlorophyllide reductase           |
| A_84_P806987 | AT5G54270.1 | 0.925211   | LHCB3 (LIGHT-HARVESTING CHLOROPHYLL BINDING PROTEIN 3)                                          |
| A_84_P14934  | AT1G01120.1 | 0.931092   | KCS1 (3-KETOACYL-COA SYNTHASE 1); acyltransferase                                               |
| A_84_P203538 | AT2G15090.1 | 1.797872   | fatty acid elongase, putative                                                                   |
| A_84_P19135  | AT2G28630.1 | 0.919017   | beta-ketoacyl-CoA synthase family protein                                                       |
| A_84_P75894  | AT2G46720.1 | 0.738909   | HIC (HIGH CARBON DIOXIDE); acyltransferase                                                      |
| A_84_P296254 | AT3G10280.1 | 0.632245   | fatty acid elongase 3-ketoacyl-CoA synthase, putative                                           |
| A_84_P229609 | AT4G01950.1 | 1.493723   | ATGPAT3/GPAT3 (GLYCEROL-3-PHOSPHATE ACYLTRANSFERASE 3); acyltransferase                         |
| A_84_P229479 | AT4G22753.1 | 0.649994   | SMO1-3 (STEROL 4-ALPHA METHYL OXIDASE); catalytic                                               |
| A_84_P764257 | AT4G33110.1 | 0.620644   | coclaurine N-methyltransferase, putative                                                        |
| A_84_P826409 | AT4G34250.1 | 1.385045   | fatty acid elongase, putative                                                                   |

|              |             |          |                                                                   |
|--------------|-------------|----------|-------------------------------------------------------------------|
| A_84_P10151  | AT5G04530.1 | 1.931044 | beta-ketoacyl-CoA synthase family protein                         |
| A_84_P12056  | AT5G08030.1 | 1.670342 | glycerophosphoryl diester phosphodiesterase family protein        |
| A_84_P14951  | AT5G38020.1 | 0.767777 | S-adenosyl-L-methionine:carboxyl methyltransferase family protein |
| A_84_P155535 | AT5G56100.1 | 1.00557  | glycine-rich protein / oleosin                                    |
| A_84_P11260  | AT5G61610.1 | 2.255993 | glycine-rich protein / oleosin                                    |

**Log2 Ratio means 35S-BnGRF2a-2 transgenic line vs WT**

**Table S4. Transcription factors involved in differentially expressed genes between the leaf of 35S-*BnGRF2a-2* and WT control plants.**

| ProbeName    | Log2 Ratio | Common name | Gene discription                                                       |
|--------------|------------|-------------|------------------------------------------------------------------------|
| A_84_P98456  | -0.7324572 | AT1G01030.1 | ABI3/VP1-related B3-domain-containing transcription factor family      |
| A_84_P17366  | -1.3088197 | AT1G01250.1 | AP2/EREBP, APETALA2/Ethylene-responsive element binding protein family |
| A_84_P14314  | -0.9196811 | AT1G01380.1 | MYB-related transcription factor family                                |
| A_84_P838948 | -1.7153369 | AT1G01520.1 | MYB-related transcription factor family                                |
| A_84_P20862  | -0.8390284 | AT1G02030.1 | C2H2 zinc finger family                                                |
| A_84_P146938 | 1.9485674  | AT1G02450.1 | unclassified                                                           |
| A_84_P23651  | 0.75433636 | AT1G03840.1 | C2H2 zinc finger family                                                |
| A_84_P17577  | -1.462693  | AT1G06180.1 | MYB domain transcription factor family                                 |
| A_84_P826004 | 0.7115402  | AT1G07000.1 | unclassified                                                           |
| A_84_P22050  | -0.6866264 | AT1G07590.1 | putative transcription regulator                                       |
| A_84_P65284  | -0.7578887 | AT1G07900.1 | AS2,Lateral Organ Boundaries Gene Family                               |
| A_84_P850940 | 0.8189573  | AT1G08465.1 | C2C2(Zn) YABBY family                                                  |
| A_84_P820734 | -1.1306056 | AT1G09250.1 | bHLH,Basic Helix-Loop-Helix family                                     |
| A_84_P237173 | -2.0852275 | AT1G10585.1 | bHLH,Basic Helix-Loop-Helix family                                     |
| A_84_P198594 | -0.8599663 | AT1G11850.1 | Trihelix, Triple-Helix transcription factor family                     |
| A_84_P16247  | 1.9637178  | AT1G12610.1 | AP2/EREBP, APETALA2/Ethylene-responsive element binding protein family |
| A_84_P20018  | 1.3884139  | AT1G12630.1 | AP2/EREBP, APETALA2/Ethylene-responsive element binding protein family |
| A_84_P13235  | 3.1324494  | AT1G13260.1 | AP2/EREBP, APETALA2/Ethylene-responsive element binding protein family |
| A_84_P23806  | 0.8536634  | AT1G13600.1 | bZIP transcription factor family                                       |
| A_84_P786186 | 0.6357136  | AT1G14580.1 | C2H2 zinc finger family                                                |
| A_84_P18064  | -0.6409426 | AT1G15580.1 | Aux/IAA family                                                         |
| A_84_P10498  | 0.6116171  | AT1G16060.1 | AP2/EREBP, APETALA2/Ethylene-responsive element binding protein family |
| A_84_P784921 | -0.6538001 | AT1G16490.1 | MYB domain transcription factor family                                 |
| A_84_P15294  | 0.8271741  | AT1G17920.1 | HB,Homeobox transcription factor family                                |
| A_84_P19074  | 1.6441717  | AT1G18570.1 | MYB domain transcription factor family                                 |
| A_84_P13338  | 1.588411   | AT1G18710.1 | MYB domain transcription factor family                                 |
| A_84_P21477  | 0.74329    | AT1G19340.1 | putative transcription regulator                                       |
| A_84_P794100 | -1.3196416 | AT1G19490.1 | bZIP transcription factor family                                       |

|              |            |             |                                                                        |
|--------------|------------|-------------|------------------------------------------------------------------------|
| A_84_P751557 | -0.8807203 | AT1G19560.1 | unclassified                                                           |
| A_84_P19080  | -0.8336982 | AT1G19700.1 | HB,Homeobox transcription factor family                                |
| A_84_P21822  | -0.8379622 | AT1G21000.1 | unclassified                                                           |
| A_84_P20470  | 2.0604105  | AT1G21910.1 | AP2/EREBP, APETALA2/Ethylene-responsive element binding protein family |
| A_84_P19082  | 1.716689   | AT1G22190.1 | AP2/EREBP, APETALA2/Ethylene-responsive element binding protein family |
| A_84_P832924 | 0.65253264 | AT1G23280.1 | unclassified                                                           |
| A_84_P21919  | 0.6554154  | AT1G25440.1 | C2C2(Zn) CO-like, Constans-like zinc finger family                     |
| A_84_P846870 | 0.6798677  | AT1G25550.1 | G2-like transcription factor family, GARP                              |
| A_84_P17189  | 3.5003254  | AT1G25560.1 | AP2/EREBP, APETALA2/Ethylene-responsive element binding protein family |
| A_84_P833445 | -0.9305745 | AT1G26790.1 | C2C2(Zn) DOF zinc finger family                                        |
| A_84_P836321 | -1.1020217 | AT1G27050.1 | HB,Homeobox transcription factor family                                |
| A_84_P21874  | 2.4570694  | AT1G27730.1 | C2H2 zinc finger family                                                |
| A_84_P11932  | 1.0061965  | AT1G29160.1 | C2C2(Zn) DOF zinc finger family                                        |
| A_84_P21614  | -1.4701095 | AT1G29600.1 | C2H2 zinc finger family                                                |
| A_84_P23778  | 0.84310246 | AT1G29940.1 | transcription                                                          |
| A_84_P15840  | -0.8369741 | AT1G31290.1 | Argonaute                                                              |
| A_84_P21517  | -2.116079  | AT1G31310.1 | Trihelix, Triple-Helix transcription factor family                     |
| A_84_P15323  | -0.8302432 | AT1G32240.1 | G2-like transcription factor family, GARP                              |
| A_84_P11450  | -1.0748615 | AT1G32870.1 | NAC domain transcription factor family                                 |
| A_84_P804411 | 0.66165817 | AT1G33240.1 | Trihelix, Triple-Helix transcription factor family                     |
| A_84_P753654 | -0.6677084 | AT1G35516.1 | MYB-related transcription factor family                                |
| A_84_P19239  | 0.61185837 | AT1G44830.1 | AP2/EREBP, APETALA2/Ethylene-responsive element binding protein family |
| A_84_P786987 | -0.8944653 | AT1G46768.1 | AP2/EREBP, APETALA2/Ethylene-responsive element binding protein family |
| A_84_P18069  | 0.84596056 | AT1G49130.1 | C2C2(Zn) CO-like, Constans-like zinc finger family                     |
| A_84_P20994  | 0.6621456  | AT1G51950.1 | Aux/IAA family                                                         |
| A_84_P13379  | 1.193903   | AT1G52830.1 | Aux/IAA family                                                         |
| A_84_P825052 | -0.9854897 | AT1G53170.1 | AP2/EREBP, APETALA2/Ethylene-responsive element binding protein family |
| A_84_P12478  | -0.8140259 | AT1G54260.1 | MYB domain transcription factor family                                 |
| A_84_P804725 | 0.85647005 | AT1G56110.1 | putative transcription regulator                                       |
| A_84_P790287 | -0.6772157 | AT1G61215.1 | Bromodomain proteins                                                   |
| A_84_P572033 | 0.6648458  | AT1G61970.1 | unclassified                                                           |
| A_84_P525034 | 2.181014   | AT1G62975.1 | bHLH,Basic Helix-Loop-Helix family                                     |

|              |            |             |                                                                        |
|--------------|------------|-------------|------------------------------------------------------------------------|
| A_84_P23752  | 0.8028373  | AT1G63650.1 | bHLH,Basic Helix-Loop-Helix family                                     |
| A_84_P242895 | 1.8225211  | AT1G66160.1 | PHOR1                                                                  |
| A_84_P87559  | 1.9202675  | AT1G66500.1 | unclassified                                                           |
| A_84_P16207  | -1.3816837 | AT1G68360.1 | C2H2 zinc finger family                                                |
| A_84_P23779  | 2.5100224  | AT1G68520.1 | C2C2(Zn) CO-like, Constans-like zinc finger family                     |
| A_84_P824210 | 0.7814207  | AT1G68580.2 | putative transcription regulator                                       |
| A_84_P859685 | -0.8619219 | AT1G68670.1 | G2-like transcription factor family, GARP                              |
| A_84_P750390 | -0.8616721 | AT1G68800.1 | TCP transcription factor family                                        |
| A_84_P19990  | 0.66341215 | AT1G68810.1 | bHLH,Basic Helix-Loop-Helix family                                     |
| A_84_P821416 | 2.5664825  | AT1G68840.1 | AP2/EREBP, APETALA2/Ethylene-responsive element binding protein family |
| A_84_P257810 | -0.7508593 | AT1G69310.1 | WRKY domain transcription factor family                                |
| A_84_P16248  | 0.8077745  | AT1G70920.1 | HB,Homeobox transcription factor family                                |
| A_84_P12444  | 1.9220775  | AT1G71030.1 | MYB-related transcription factor family                                |
| A_84_P216728 | -1.1322985 | AT1G71130.1 | AP2/EREBP, APETALA2/Ethylene-responsive element binding protein family |
| A_84_P21584  | 0.8965006  | AT1G72210.1 | bHLH,Basic Helix-Loop-Helix family                                     |
| A_84_P14290  | 0.61281    | AT1G72440.1 | CCAAT box binding factor family, DR1                                   |
| A_84_P22810  | 1.3122834  | AT1G73830.1 | bHLH,Basic Helix-Loop-Helix family                                     |
| A_84_P235073 | -0.9043303 | AT1G73870.1 | C2C2(Zn) CO-like, Constans-like zinc finger family                     |
| A_84_P13376  | 0.62947613 | AT1G74430.1 | MYB domain transcription factor family                                 |
| A_84_P19028  | 4.3653283  | AT1G74930.1 | AP2/EREBP, APETALA2/Ethylene-responsive element binding protein family |
| A_84_P750006 | -1.0340992 | AT1G75250.1 | MYB-related transcription factor family                                |
| A_84_P817969 | 0.6487012  | AT1G75390.2 | bZIP transcription factor family                                       |
| A_84_P19196  | 0.7551984  | AT1G75490.1 | AP2/EREBP, APETALA2/Ethylene-responsive element binding protein family |
| A_84_P154615 | -1.4911317 | AT1G76590.1 | unclassified                                                           |
| A_84_P22740  | 1.2406311  | AT1G77200.1 | AP2/EREBP, APETALA2/Ethylene-responsive element binding protein family |
| A_84_P512655 | 2.60004    | AT1G77640.1 | AP2/EREBP, APETALA2/Ethylene-responsive element binding protein family |
| A_84_P10582  | 0.73020935 | AT1G78600.1 | C2C2(Zn) CO-like, Constans-like zinc finger family                     |
| A_84_P21850  | -1.0067806 | AT1G79700.1 | AP2/EREBP, APETALA2/Ethylene-responsive element binding protein family |
| A_84_P11458  | 0.69910824 | AT1G80270.1 | putative transcription regulator                                       |
| A_84_P17047  | 0.9414592  | AT1G80730.1 | C2H2 zinc finger family                                                |
| A_84_P786760 | 3.0279534  | AT1G80840.1 | WRKY domain transcription factor family                                |
| A_84_P12545  | 0.73058885 | AT2G01940.1 | C2H2 zinc finger family                                                |

|              |            |             |                                                                        |
|--------------|------------|-------------|------------------------------------------------------------------------|
| A_84_P533968 | 0.97478384 | AT2G02540.1 | zf-HD                                                                  |
| A_84_P15449  | -0.8875541 | AT2G03500.1 | G2-like transcription factor family, GARP                              |
| A_84_P16304  | -1.1229306 | AT2G16720.1 | MYB domain transcription factor family                                 |
| A_84_P757492 | -0.589779  | AT2G17150.2 | NIN-like bZIP-related family                                           |
| A_84_P79415  | 1.0634412  | AT2G18300.1 | bHLH,Basic Helix-Loop-Helix family                                     |
| A_84_P137499 | 1.125701   | AT2G20180.1 | bHLH,Basic Helix-Loop-Helix family                                     |
| A_84_P10627  | -2.0181231 | AT2G20880.1 | AP2/EREBP, APETALA2/Ethylene-responsive element binding protein family |
| A_84_P21970  | -1.5147219 | AT2G22200.1 | AP2/EREBP, APETALA2/Ethylene-responsive element binding protein family |
| A_84_P22932  | 1.1597509  | AT2G22770.1 | bHLH,Basic Helix-Loop-Helix family                                     |
| A_84_P22073  | -0.8453786 | AT2G22800.1 | HB,Homeobox transcription factor family                                |
| A_84_P15371  | 1.6631156  | AT2G23290.1 | MYB domain transcription factor family                                 |
| A_84_P826703 | -0.7389078 | AT2G23340.1 | AP2/EREBP, APETALA2/Ethylene-responsive element binding protein family |
| A_84_P16367  | 0.7124548  | AT2G24120.1 | transcription                                                          |
| A_84_P560603 | 2.9545107  | AT2G24700.1 | B3 transcription factor family                                         |
| A_84_P800742 | 0.9727713  | AT2G25900.1 | C3H zinc finger family                                                 |
| A_84_P67324  | -1.0694293 | AT2G25930.1 | ELF3                                                                   |
| A_84_P19231  | 0.950633   | AT2G26150.1 | HSF,Heat-shock transcription factor family                             |
| A_84_P785044 | 0.71498203 | AT2G27840.1 | HDA                                                                    |
| A_84_P12501  | -1.4334364 | AT2G28200.1 | C2H2 zinc finger family                                                |
| A_84_P12522  | -0.6657577 | AT2G28710.1 | C2H2 zinc finger family                                                |
| A_84_P23859  | 1.219042   | AT2G30250.1 | WRKY domain transcription factor family                                |
| A_84_P820717 | -0.6743507 | AT2G33480.2 | NAC domain transcription factor family                                 |
| A_84_P525172 | -1.8928661 | AT2G33720.1 | ABI3/VP1-related B3-domain-containing transcription factor family      |
| A_84_P98726  | 0.95735365 | AT2G34620.1 | unclassified                                                           |
| A_84_P53500  | 1.2917018  | AT2G35310.1 | B3 transcription factor family                                         |
| A_84_P186194 | -1.4984293 | AT2G35640.1 | Trihelix, Triple-Helix transcription factor family                     |
| A_84_P89769  | 0.64964586 | AT2G35930.1 | PHOR1                                                                  |
| A_84_P848800 | -0.6703906 | AT2G35940.1 | HB,Homeobox transcription factor family                                |
| A_84_P505670 | 0.7481695  | AT2G36080.1 | ABI3/VP1-related B3-domain-containing transcription factor family      |
| A_84_P265480 | 0.85882944 | AT2G36400.1 | General Transcription                                                  |
| A_84_P790617 | 0.8249396  | AT2G37590.1 | C2C2(Zn) DOF zinc finger family                                        |
| A_84_P832965 | -0.9845868 | AT2G38300.1 | G2-like transcription factor family, GARP                              |



|              |            |             |                                                                        |
|--------------|------------|-------------|------------------------------------------------------------------------|
| A_84_P17326  | 1.3018245  | AT2G38470.1 | WRKY domain transcription factor family                                |
| A_84_P857301 | 0.68133545 | AT2G40140.1 | C3H zinc finger family                                                 |
| A_84_P609600 | -1.5718937 | AT2G40200.1 | bHLH,Basic Helix-Loop-Helix family                                     |
| A_84_P21088  | -1.0773716 | AT2G40670.1 | ARR                                                                    |
| A_84_P51550  | 0.9457083  | AT2G40750.1 | WRKY domain transcription factor family                                |
| A_84_P14429  | -0.7233552 | AT2G41340.1 | transcription                                                          |
| A_84_P21003  | -0.7079487 | AT2G41900.1 | C3H zinc finger family                                                 |
| A_84_P581112 | -1.0372223 | AT2G42150.1 | Bromodomain proteins                                                   |
| A_84_P55980  | -0.6655456 | AT2G42280.1 | bHLH,Basic Helix-Loop-Helix family                                     |
| A_84_P786936 | 0.94588953 | AT2G42300.1 | bHLH,Basic Helix-Loop-Helix family                                     |
| A_84_P22972  | 1.37499    | AT2G42980.1 | unclassified                                                           |
| A_84_P81529  | -0.9111033 | AT2G43060.1 | unclassified                                                           |
| A_84_P19235  | 0.824047   | AT2G44910.1 | HB,Homeobox transcription factor family                                |
| A_84_P12573  | -1.079153  | AT2G44940.1 | AP2/EREBP, APETALA2/Ethylene-responsive element binding protein family |
| A_84_P788026 | 2.195382   | AT2G45480.1 | General Transcription                                                  |
| A_84_P22009  | -0.6995163 | AT2G45660.1 | MADS box transcription factor family                                   |
| A_84_P19130  | -0.9459726 | AT2G46270.1 | bZIP transcription factor family                                       |
| A_84_P19210  | 1.0103959  | AT2G46400.1 | WRKY domain transcription factor family                                |
| A_84_P581126 | -1.0837002 | AT2G46670.1 | unclassified                                                           |
| A_84_P10659  | -0.5928631 | AT2G46680.1 | HB,Homeobox transcription factor family                                |
| A_84_P126821 | -1.0865116 | AT2G46790.1 | Psudo ARR transcription factor family                                  |
| A_84_P23970  | 0.79676443 | AT2G46870.1 | ABI3/VP1-related B3-domain-containing transcription factor family      |
| A_84_P521683 | -1.4495002 | AT2G46970.1 | bHLH,Basic Helix-Loop-Helix family                                     |
| A_84_P19141  | -1.9400859 | AT2G47460.1 | MYB domain transcription factor family                                 |
| A_84_P824668 | -0.9989223 | AT3G01140.1 | MYB domain transcription factor family                                 |
| A_84_P821989 | -0.7157875 | AT3G01560.1 | Trihelix, Triple-Helix transcription factor family                     |
| A_84_P14529  | -1.1019405 | AT3G01970.1 | WRKY domain transcription factor family                                |
| A_84_P22105  | -0.8627845 | AT3G04030.1 | MYB domain transcription factor family                                 |
| A_84_P10735  | 0.8631135  | AT3G05060.1 | putative transcription regulator                                       |
| A_84_P90109  | -1.5120068 | AT3G05800.1 | bHLH,Basic Helix-Loop-Helix family                                     |
| A_84_P11699  | -0.7218877 | AT3G06410.1 | unclassified                                                           |
| A_84_P13573  | -0.9687448 | AT3G07650.1 | C2C2(Zn) CO-like, Constans-like zinc finger family                     |

|              |            |             |                                                                        |
|--------------|------------|-------------|------------------------------------------------------------------------|
| A_84_P52560  | 1.5667824  | AT3G13000.1 | NAC domain transcription factor family                                 |
| A_84_P111702 | 0.65412515 | AT3G13940.1 | General Transcription                                                  |
| A_84_P225239 | 0.599638   | AT3G13960.1 | General Transcription                                                  |
| A_84_P14556  | 0.89331996 | AT3G15540.1 | Aux/IAA family                                                         |
| A_84_P201258 | -1.4220657 | AT3G16280.1 | AP2/EREBP, APETALA2/Ethylene-responsive element binding protein family |
| A_84_P18338  | -0.9861593 | AT3G16770.1 | AP2/EREBP, APETALA2/Ethylene-responsive element binding protein family |
| A_84_P830631 | -0.7165795 | AT3G16940.1 | AtSR Transcription Factor family                                       |
| A_84_P87549  | -0.7381715 | AT3G17609.1 | bZIP transcription factor family                                       |
| A_84_P21177  | -0.8626221 | AT3G17611.1 | unclassified                                                           |
| A_84_P797883 | -0.8793392 | AT3G18290.1 | C2H2 zinc finger family                                                |
| A_84_P21219  | 1.0300092  | AT3G19580.1 | C2H2 zinc finger family                                                |
| A_84_P244235 | -1.2578197 | AT3G20810.1 | JUMONJI family                                                         |
| A_84_P16492  | -1.7788582 | AT3G21150.1 | C2C2(Zn) CO-like, Constans-like zinc finger family                     |
| A_84_P23101  | -1.8866882 | AT3G21890.1 | C2C2(Zn) CO-like, Constans-like zinc finger family                     |
| A_84_P519526 | -0.8068499 | AT3G22100.1 | bHLH,Basic Helix-Loop-Helix family                                     |
| A_84_P51800  | -0.7429649 | AT3G23210.1 | bHLH,Basic Helix-Loop-Helix family                                     |
| A_84_P22140  | 2.1218295  | AT3G23250.1 | MYB domain transcription factor family                                 |
| A_84_P517340 | -0.8153333 | AT3G24140.1 | bHLH,Basic Helix-Loop-Helix family                                     |
| A_84_P11760  | 1.0092716  | AT3G24340.1 | Chromatin Remodeling Factors                                           |
| A_84_P827833 | -0.9395255 | AT3G24520.1 | HSF,Heat-shock transcription factor family                             |
| A_84_P565178 | 1.1599284  | AT3G25882.1 | unclassified                                                           |
| A_84_P760208 | 1.2736251  | AT3G26620.1 | AS2,Lateral Organ Boundaries Gene Family                               |
| A_84_P826638 | -2.4514372 | AT3G26790.1 | ABI3/VP1-related B3-domain-containing transcription factor family      |
| A_84_P138519 | -0.8951349 | AT3G27220.1 | MYB domain transcription factor family                                 |
| A_84_P222339 | -0.6296667 | AT3G27940.1 | AS2,Lateral Organ Boundaries Gene Family                               |
| A_84_P22181  | 1.1905236  | AT3G28210.1 | C2H2 zinc finger family                                                |
| A_84_P11762  | 1.0471201  | AT3G28910.1 | MYB domain transcription factor family                                 |
| A_84_P160413 | 0.72451305 | AT3G44750.1 | HDA                                                                    |
| A_84_P23142  | 2.2231185  | AT3G45260.1 | C2H2 zinc finger family                                                |
| A_84_P18416  | 2.5802794  | AT3G46080.1 | C2H2 zinc finger family                                                |
| A_84_P19362  | 2.3762727  | AT3G46090.1 | C2H2 zinc finger family                                                |
| A_84_P218028 | -1.7439508 | AT3G47640.1 | bHLH,Basic Helix-Loop-Helix family                                     |

|              |            |             |                                                                        |
|--------------|------------|-------------|------------------------------------------------------------------------|
| A_84_P13699  | 1.1286794  | AT3G48550.1 | unclassified                                                           |
| A_84_P12758  | 0.7504     | AT3G49410.1 | putative transcription regulator                                       |
| A_84_P20325  | 2.4250352  | AT3G50060.1 | MYB domain transcription factor family                                 |
| A_84_P544867 | -0.871586  | AT3G50510.1 | AS2,Lateral Organ Boundaries Gene Family                               |
| A_84_P826034 | 2.2191477  | AT3G52450.1 | PHOR1                                                                  |
| A_84_P760097 | -0.7406188 | AT3G52910.1 | GRF zinc finger family                                                 |
| A_84_P177804 | 0.9911041  | AT3G54460.1 | Chromatin Remodeling Factors                                           |
| A_84_P813219 | 1.467391   | AT3G54810.1 | C2C2(Zn) GATA transcription factor family                              |
| A_84_P12783  | -0.8169217 | AT3G54990.1 | AP2/EREBP, APETALA2/Ethylene-responsive element binding protein family |
| A_84_P13733  | 1.9551038  | AT3G55980.1 | C3H zinc finger family                                                 |
| A_84_P14680  | -1.094839  | AT3G56380.1 | ARR                                                                    |
| A_84_P16571  | 1.1506643  | AT3G56400.1 | WRKY domain transcription factor family                                |
| A_84_P21302  | 0.9354092  | AT3G56660.1 | bZIP transcription factor family                                       |
| A_84_P17519  | 0.6104708  | AT3G57040.1 | ARR                                                                    |
| A_84_P20359  | -1.0271964 | AT3G57540.1 | putative transcription regulator                                       |
| A_84_P22252  | 0.846263   | AT3G57660.1 | transcription                                                          |
| A_84_P23199  | -0.7548409 | AT3G58070.1 | C2H2 zinc finger family                                                |
| A_84_P10906  | 2.4860492  | AT3G58120.1 | bZIP transcription factor family                                       |
| A_84_P15635  | 2.0385294  | AT3G59080.1 | unclassified                                                           |
| A_84_P13751  | -1.2161517 | AT3G60490.1 | AP2/EREBP, APETALA2/Ethylene-responsive element binding protein family |
| A_84_P24157  | -1.1944641 | AT3G61250.1 | MYB domain transcription factor family                                 |
| A_84_P24159  | 0.81814194 | AT3G61820.1 | unclassified                                                           |
| A_84_P15646  | -1.4057837 | AT3G61890.1 | HB,Homeobox transcription factor family                                |
| A_84_P90919  | 1.7417011  | AT3G61950.1 | bHLH,Basic Helix-Loop-Helix family                                     |
| A_84_P20376  | 1.4220676  | AT3G61970.1 | ABI3/VP1-related B3-domain-containing transcription factor family      |
| A_84_P860907 | 0.97375673 | AT3G62420.1 | bZIP transcription factor family                                       |
| A_84_P254310 | -0.6568756 | AT4G00270.1 | GeBP like                                                              |
| A_84_P16606  | 1.2348233  | AT4G01250.1 | WRKY domain transcription factor family                                |
| A_84_P823176 | -0.6957911 | AT4G01280.1 | MYB-related transcription factor family                                |
| A_84_P828934 | 0.6604606  | AT4G01460.1 | bHLH,Basic Helix-Loop-Helix family                                     |
| A_84_P10002  | 1.4208791  | AT4G04810.1 | putative transcription regulator                                       |
| A_84_P785527 | 0.7278604  | AT4G04830.1 | putative transcription regulator                                       |

|              |            |             |                                                                        |
|--------------|------------|-------------|------------------------------------------------------------------------|
| A_84_P10949  | -1.9955525 | AT4G05100.1 | MYB domain transcription factor family                                 |
| A_84_P789539 | -1.6423926 | AT4G06746.1 | AP2/EREBP, APETALA2/Ethylene-responsive element binding protein family |
| A_84_P18522  | 2.5467486  | AT4G09820.1 | bHLH,Basic Helix-Loop-Helix family                                     |
| A_84_P23363  | 0.6018391  | AT4G14550.1 | Aux/IAA family                                                         |
| A_84_P10124  | 1.1063899  | AT4G14560.1 | Aux/IAA family                                                         |
| A_84_P275810 | -0.6458073 | AT4G16610.1 | C2H2 zinc finger family                                                |
| A_84_P12969  | 0.60772514 | AT4G17230.1 | GRAS transcription factor family                                       |
| A_84_P19589  | 0.82991993 | AT4G17460.1 | HB,Homeobox transcription factor family                                |
| A_84_P19485  | -0.8446896 | AT4G17880.1 | bHLH,Basic Helix-Loop-Helix family                                     |
| A_84_P22337  | -2.203146  | AT4G21440.1 | MYB domain transcription factor family                                 |
| A_84_P17613  | -0.9547306 | AT4G22950.1 | MADS box transcription factor family                                   |
| A_84_P20453  | 0.78853214 | AT4G23540.1 | unclassified                                                           |
| A_84_P23291  | 0.6886278  | AT4G23550.1 | WRKY domain transcription factor family                                |
| A_84_P763290 | 2.0501375  | AT4G23810.1 | WRKY domain transcription factor family                                |
| A_84_P10055  | -0.7421444 | AT4G24240.1 | WRKY domain transcription factor family                                |
| A_84_P19516  | 2.9988449  | AT4G25470.1 | AP2/EREBP, APETALA2/Ethylene-responsive element binding protein family |
| A_84_P23301  | 0.650424   | AT4G25730.1 | putative transcription regulator                                       |
| A_84_P11955  | -1.8586265 | AT4G26150.1 | C2C2(Zn) GATA transcription factor family                              |
| A_84_P15749  | 0.72555536 | AT4G29030.1 | Trihelix, Triple-Helix transcription factor family                     |
| A_84_P141109 | -1.6285233 | AT4G30410.1 | unclassified                                                           |
| A_84_P786210 | 0.90636724 | AT4G31550.2 | WRKY domain transcription factor family                                |
| A_84_P785249 | 1.2849655  | AT4G31800.1 | WRKY domain transcription factor family                                |
| A_84_P21437  | 0.5948296  | AT4G31805.1 | WRKY domain transcription factor family                                |
| A_84_P55550  | -0.8856392 | AT4G32280.1 | Aux/IAA family                                                         |
| A_84_P20495  | 0.79563046 | AT4G32800.1 | AP2/EREBP, APETALA2/Ethylene-responsive element binding protein family |
| A_84_P15766  | 1.0995237  | AT4G32980.1 | HB,Homeobox transcription factor family                                |
| A_84_P12939  | -1.1036931 | AT4G34990.1 | MYB domain transcription factor family                                 |
| A_84_P832800 | -0.8150321 | AT4G35270.1 | NIN-like bZIP-related family                                           |
| A_84_P23377  | -0.9875518 | AT4G37180.1 | G2-like transcription factor family, GARP                              |
| A_84_P14864  | 1.9409246  | AT4G37260.1 | MYB domain transcription factor family                                 |
| A_84_P534390 | 5.1198654  | AT4G37740.1 | General Transcription                                                  |
| A_84_P19568  | 1.6944323  | AT4G38000.1 | C2C2(Zn) DOF zinc finger family                                        |

|              |            |             |                                                                        |
|--------------|------------|-------------|------------------------------------------------------------------------|
| A_84_P563858 | 1.466002   | AT4G38340.1 | NIN-like bZIP-related family                                           |
| A_84_P12951  | -1.2878503 | AT4G38620.1 | MYB domain transcription factor family                                 |
| A_84_P19572  | 0.7163848  | AT4G38890.1 | C3H zinc finger family                                                 |
| A_84_P16735  | 2.098999   | AT4G39070.1 | C2C2(Zn) CO-like, Constans-like zinc finger family                     |
| A_84_P22412  | 1.5524594  | AT4G39410.1 | WRKY domain transcription factor family                                |
| A_84_P10120  | -1.1280432 | AT4G39780.1 | AP2/EREBP, APETALA2/Ethylene-responsive element binding protein family |
| A_84_P14847  | -0.6580753 | AT4G40060.1 | HB,Homeobox transcription factor family                                |
| A_84_P21494  | 0.8076753  | AT5G02810.1 | Pseudo ARR transcription factor family                                 |
| A_84_P19604  | -0.6210871 | AT5G03680.1 | Trihelix, Triple-Helix transcription factor family                     |
| A_84_P22442  | -0.6983761 | AT5G03720.1 | HSF,Heat-shock transcription factor family                             |
| A_84_P17934  | 1.0798473  | AT5G04340.1 | C2H2 zinc finger family                                                |
| A_84_P10152  | 1.1981268  | AT5G04760.1 | MYB-related transcription factor family                                |
| A_84_P196034 | 0.70856285 | AT5G05090.1 | G2-like transcription factor family, GARP                              |
| A_84_P551242 | 0.7326736  | AT5G06550.1 | JUMONJI family                                                         |
| A_84_P18673  | 1.0232584  | AT5G07690.1 | MYB domain transcription factor family                                 |
| A_84_P19619  | 1.6356202  | AT5G07700.1 | MYB domain transcription factor family                                 |
| A_84_P18676  | 1.1239232  | AT5G08520.1 | MYB-related transcription factor family                                |
| A_84_P19627  | 0.90961754 | AT5G10510.1 | AP2/EREBP, APETALA2/Ethylene-responsive element binding protein family |
| A_84_P14898  | 1.3252534  | AT5G10760.1 | unclassified                                                           |
| A_84_P17925  | 0.7244464  | AT5G11060.1 | HB,Homeobox transcription factor family                                |
| A_84_P16792  | -1.4126444 | AT5G11260.1 | bZIP transcription factor family                                       |
| A_84_P797499 | -0.7563487 | AT5G11430.1 | putative transcription regulator                                       |
| A_84_P11122  | -1.3567839 | AT5G11590.1 | AP2/EREBP, APETALA2/Ethylene-responsive element binding protein family |
| A_84_P20587  | 1.4173036  | AT5G15150.1 | HB,Homeobox transcription factor family                                |
| A_84_P16959  | 0.7475628  | AT5G15700.1 | transcription                                                          |
| A_84_P188424 | -2.2670422 | AT5G15800.1 | MADS box transcription factor family                                   |
| A_84_P15068  | -0.6429408 | AT5G15830.1 | bZIP transcription factor family                                       |
| A_84_P522915 | 0.6149235  | AT5G16560.1 | G2-like transcription factor family, GARP                              |
| A_84_P18856  | 1.1372432  | AT5G17490.1 | GRAS transcription factor family                                       |
| A_84_P12248  | -0.6446433 | AT5G19490.1 | putative transcription regulator                                       |
| A_84_P15083  | 0.64521784 | AT5G19520.1 | putative transcription regulator                                       |
| A_84_P845967 | 1.2092243  | AT5G22570.1 | WRKY domain transcription factor family                                |

|              |            |             |                                                    |
|--------------|------------|-------------|----------------------------------------------------|
| A_84_P13033  | 0.6567259  | AT5G22650.1 | HDA                                                |
| A_84_P767969 | 0.73301935 | AT5G23260.2 | MADS box transcription factor family               |
| A_84_P308743 | 0.8008176  | AT5G23280.1 | TCP transcription factor family                    |
| A_84_P826417 | 1.1862596  | AT5G24110.1 | WRKY domain transcription factor family            |
| A_84_P13983  | -1.2929927 | AT5G24120.1 | transcription                                      |
| A_84_P766536 | 0.64056975 | AT5G25220.1 | HB,Homeobox transcription factor family            |
| A_84_P11156  | 1.260398   | AT5G26170.1 | WRKY domain transcription factor family            |
| A_84_P12103  | 1.0720128  | AT5G27120.1 | putative transcription regulator                   |
| A_84_P19805  | 1.122262   | AT5G28650.1 | WRKY domain transcription factor family            |
| A_84_P17923  | 0.74788195 | AT5G28770.1 | bZIP transcription factor family                   |
| A_84_P14948  | -1.258563  | AT5G37260.1 | MYB-related transcription factor family            |
| A_84_P23462  | 1.3928775  | AT5G37540.1 | unclassified                                       |
| A_84_P17795  | 0.6762391  | AT5G39840.1 | transcription                                      |
| A_84_P19687  | -2.4566073 | AT5G39860.1 | bHLH,Basic Helix-Loop-Helix family                 |
| A_84_P11180  | -0.8307648 | AT5G40330.1 | MYB domain transcription factor family             |
| A_84_P12125  | 0.7907905  | AT5G40340.1 | PWWP domain protein                                |
| A_84_P547046 | 1.4423141  | AT5G41315.1 | bHLH,Basic Helix-Loop-Helix family                 |
| A_84_P23477  | -0.7379838 | AT5G41410.1 | HB,Homeobox transcription factor family            |
| A_84_P273920 | -2.6576064 | AT5G41910.1 | transcription                                      |
| A_84_P21591  | 1.3375062  | AT5G43170.1 | C2H2 zinc finger family                            |
| A_84_P21592  | -0.7785006 | AT5G43500.1 | putative transcription regulator                   |
| A_84_P547813 | 0.5974917  | AT5G43990.1 | SET-domain transcriptional regulator family        |
| A_84_P23486  | 0.714363   | AT5G44160.1 | C2H2 zinc finger family                            |
| A_84_P267250 | 1.156973   | AT5G44190.1 | G2-like transcription factor family, GARP          |
| A_84_P830750 | 0.67510605 | AT5G44560.2 | SNF7                                               |
| A_84_P22549  | -0.6328945 | AT5G46350.1 | WRKY domain transcription factor family            |
| A_84_P68194  | 2.050077   | AT5G46710.1 | unclassified                                       |
| A_84_P18773  | -1.2960639 | AT5G48250.1 | C2C2(Zn) CO-like, Constans-like zinc finger family |
| A_84_P15939  | -1.6595392 | AT5G49330.1 | MYB domain transcription factor family             |
| A_84_P13104  | 1.038905   | AT5G49520.1 | WRKY domain transcription factor family            |
| A_84_P245725 | 0.70803696 | AT5G50010.1 | bHLH,Basic Helix-Loop-Helix family                 |
| A_84_P528334 | 1.257247   | AT5G50915.1 | bHLH,Basic Helix-Loop-Helix family                 |

|              |            |             |                                                         |
|--------------|------------|-------------|---------------------------------------------------------|
| A_84_P16894  | 1.683567   | AT5G51910.1 | TCP transcription factor family                         |
| A_84_P53580  | -0.9142923 | AT5G52600.1 | MYB domain transcription factor family                  |
| A_84_P219828 | -1.1280565 | AT5G52660.1 | MYB-related transcription factor family                 |
| A_84_P15006  | -0.758789  | AT5G53200.1 | MYB-related transcription factor family                 |
| A_84_P242573 | -1.6647443 | AT5G54470.1 | C2C2(Zn) CO-like, Constans-like zinc finger family      |
| A_84_P867087 | -0.8809356 | AT5G54930.1 | putative transcription regulator                        |
| A_84_P11239  | 1.6858654  | AT5G56840.1 | MYB-related transcription factor family                 |
| A_84_P827727 | -1.0292042 | AT5G56860.1 | C2C2(Zn) GATA transcription factor family               |
| A_84_P528434 | 1.273798   | AT5G56960.1 | bHLH,Basic Helix-Loop-Helix family                      |
| A_84_P522226 | 1.3191547  | AT5G57420.1 | Aux/IAA family                                          |
| A_84_P10296  | 0.7563561  | AT5G57660.1 | C2C2(Zn) CO-like, Constans-like zinc finger family      |
| A_84_P791069 | -0.7853618 | AT5G58340.1 | MYB-related transcription factor family                 |
| A_84_P11244  | 0.76913464 | AT5G58430.1 | unclassified                                            |
| A_84_P11250  | -0.9836587 | AT5G59570.1 | G2-like transcription factor family, GARP               |
| A_84_P14086  | 0.64509106 | AT5G59780.1 | MYB domain transcription factor family                  |
| A_84_P16923  | 2.6754284  | AT5G59820.1 | C2H2 zinc finger family                                 |
| A_84_P869736 | -3.0468225 | AT5G62165.1 | MADS box transcription factor family                    |
| A_84_P10318  | 0.8507261  | AT5G62470.1 | MYB domain transcription factor family                  |
| A_84_P18829  | -0.6206216 | AT5G62920.1 | ARR                                                     |
| A_84_P766867 | -0.6033019 | AT5G63470.1 | CCAAT box binding factor family, HAP5                   |
| A_84_P245045 | 0.71836185 | AT5G64660.1 | PHOR1                                                   |
| A_84_P225559 | 2.5532818  | AT5G64810.1 | WRKY domain transcription factor family                 |
| A_84_P13165  | 1.1191382  | AT5G65320.1 | bHLH,Basic Helix-Loop-Helix family                      |
| A_84_P12221  | 0.5963936  | AT5G65630.1 | Global transcription factor group                       |
| A_84_P598586 | -0.8270721 | AT5G66620.1 | Orphan family                                           |
| A_84_P807259 | 1.41613    | AT5G67300.1 | MYB domain transcription factor family                  |
| A_84_P818463 | 0.85203636 | AT5G67420.1 | AS2,Lateral Organ Boundaries Gene Family                |
| A_84_P21685  | 1.1297098  | AT5G67450.1 | C2H2 zinc finger family                                 |
| A_84_P92059  | 2.1732006  | AT5G67480.1 | Transcriptional Adaptor Zinc Bundle (TAZ) domain family |

**Log2 Ratio means 35S-BnGRF2a-2 transgenic line vs WT**

**Table S3. An overview of differential genes expression between the leaf of 35S-*BnGRF2a-2* and WT control plants.**

| ProbeName    | Log2 Ratio | Common name | Description                                                                        |
|--------------|------------|-------------|------------------------------------------------------------------------------------|
| A_84_P181994 | -4.61172   | AT3G02040.1 | SRG3 (SENESCENCE-RELATED GENE 3); glycerophosphodiester phosphodiesterase          |
| A_84_P22400  | -4.49962   | AT4G35770.1 | SEN1 (DARK INDUCIBLE 1)                                                            |
| A_84_P19368  | -3.95761   | AT3G47340.1 | ASN1 (DARK INDUCIBLE 6)                                                            |
| A_84_P16885  | -3.64012   | AT5G49360.1 | BXL1 (BETA-XYLOSIDASE 1); hydrolase, hydrolyzing O-glycosyl compounds              |
| A_84_P22643  | -3.59222   | AT5G20150.1 | SPX (SYG1/Pho81/XPR1) domain-containing protein                                    |
| A_84_P13568  | -3.3507    | AT2G33830.1 | dormancy/auxin associated family protein                                           |
| A_84_P130356 | -3.15966   | AT5G20790.1 | similar to unknown protein [Arabidopsis thaliana] (TAIR:AT3G43110.1)               |
| A_84_P14620  | -3.14886   | AT3G52310.1 | ABC transporter family protein                                                     |
| A_84_P869736 | -3.04682   | AT5G62165.1 | AGL42 (AGAMOUS LIKE 42); transcription factor                                      |
| A_84_P768104 | -2.96448   | AT5G44973.1 | Encodes a defensin-like (DEFL) family protein.                                     |
| A_84_P17929  | -2.94661   | AT1G56600.1 | ATGOLS2 (ARABIDOPSIS THALIANA GALACTINOL SYNTHASE 2); transferase                  |
| A_84_P13908  | -2.87856   | AT4G15460.1 | glycine-rich protein                                                               |
| A_84_P603414 | -2.77895   | AT2G46940.1 | similar to unknown protein [Arabidopsis thaliana]                                  |
| A_84_P814654 | -2.77345   | AT5G39190.1 | GLP2A (GERMIN-LIKE PROTEIN 2A)                                                     |
| A_84_P132955 | -2.70477   | AT5G39160.1 | germin-like protein (GLP2a) (GLP5a)                                                |
| A_84_P228049 | -2.70422   | AT5G63160.1 | BT1 (BTB and TAZ domain protein 1); protein binding / transcription regulator      |
| A_84_P273920 | -2.65761   | AT5G41910.1 | RNA polymerase II mediator complex protein-related                                 |
| A_84_P192434 | -2.60889   | AT4G36850.1 | PQ-loop repeat family protein / transmembrane family protein                       |
| A_84_P814660 | -2.55285   | AT5G39130.1 | germin-like protein, putative                                                      |
| A_84_P17817  | -2.51434   | AT5G45810.1 | CIPK19 (SNF1-RELATED PROTEIN KINASE 3.5); kinase                                   |
| A_84_P565562 | -2.50478   | AT5G57780.1 | transcription regulator                                                            |
| A_84_P54840  | -2.48121   | AT3G19270.1 | CYP707A4 (cytochrome P450, family 707, subfamily A, polypeptide 4); oxygen binding |
| A_84_P19687  | -2.45661   | AT5G39860.1 | PRE1 (PACLOBUTRAZOL RESISTANCE1); DNA binding / transcription factor               |
| A_84_P826638 | -2.45144   | AT3G26790.1 | FUS3 (FUSCA 3); DNA binding / transcription factor                                 |
| A_84_P297634 | -2.44857   | AT5G15500.1 | ankyrin repeat family protein                                                      |
| A_84_P260800 | -2.42871   | AT4G19430.1 | unknown protein                                                                    |
| A_84_P556641 | -2.42208   | AT5G36960.1 | unknown protein                                                                    |
| A_84_P12990  | -2.33405   | AT5G05490.1 | DIF1/SYN1                                                                          |



|              |          |             |                                                                                          |
|--------------|----------|-------------|------------------------------------------------------------------------------------------|
| A_84_P21184  | -2.29316 | AT3G17790.1 | ATACP5 (acid phosphatase 5); acid phosphatase/ protein serine/threonine phosphatase      |
| A_84_P508552 | -2.29308 | AT4G05497.1 | F-box family protein                                                                     |
| A_84_P805635 | -2.26865 | AT1G25370.1 | similar to unknown protein; contains InterPro domain Protein of unknown function DUF1639 |
| A_84_P19553  | -2.26751 | AT4G33790.1 | acyl CoA reductase, putative                                                             |
| A_84_P188424 | -2.26704 | AT5G15800.1 | SEP1 (SEPALLATA1); DNA binding / transcription factor                                    |
| A_84_P109472 | -2.24272 | AT2G47770.1 | benzodiazepine receptor-related                                                          |
| A_84_P265780 | -2.24102 | AT5G15840.1 | CO (CONSTANS); transcription factor/ zinc ion binding                                    |
| A_84_P824811 | -2.23135 | AT2G32870.1 | meprin and TRAF homology domain-containing protein / MATH domain-containing protein      |
| A_84_P20068  | -2.22305 | AT2G05540.1 | glycine-rich protein                                                                     |
| A_84_P22337  | -2.20315 | AT4G21440.1 | ATM4/ATMYB102 (ARABIDOPSIS MYB-LIKE 102); DNA binding / transcription factor             |
| A_84_P841862 | -2.20103 | AT5G53710.1 | unknown protein                                                                          |
| A_84_P301400 | -2.19298 | AT3G18950.1 | transducin family protein / WD-40 repeat family protein                                  |
| A_84_P52140  | -2.17737 | AT1G24580.1 | zinc finger (C3HC4-type RING finger) family protein                                      |
| A_84_P145509 | -2.16587 | AT3G50840.1 | phototropic-responsive NPH3 family protein                                               |
| A_84_P787273 | -2.16026 | AT5G24600.1 | similar to unknown protein; contains InterPro domain Protein of unknown function DUF599  |
| A_84_P19997  | -2.14698 | AT1G74670.1 | gibberellin-responsive protein, putative [AT1G74670.1]                                   |
| A_84_P511355 | -2.11856 | AT5G06380.1 | similar to unknown protein [Arabidopsis thaliana] (TAIR:AT3G11690.1)                     |
| A_84_P11805  | -2.11619 | AT3G47420.1 | glycerol-3-phosphate transporter, putative / glycerol 3-phosphate permease, putative     |
| A_84_P21517  | -2.11608 | AT1G31310.1 | hydroxyproline-rich glycoprotein family protein                                          |
| A_84_P787776 | -2.11443 | AT3G56260.1 | unknown protein                                                                          |
| A_84_P237173 | -2.08523 | AT1G10585.1 | transcription factor                                                                     |
| A_84_P12526  | -2.06263 | AT2G20510.1 | ATTIM44-1 (Arabidopsis thaliana translocase inner membrane subunit 44-1)                 |
| A_84_P10627  | -2.01812 | AT2G20880.1 | AP2 domain-containing transcription factor, putative                                     |
| A_84_P10949  | -1.99555 | AT4G05100.1 | AtMYB74 (myb domain protein 74); DNA binding / transcription factor                      |
| A_84_P105996 | -1.99402 | AT4G36470.1 | S-adenosyl-L-methionine:carboxyl methyltransferase family protein                        |
| A_84_P22866  | -1.99359 | AT1G20070.1 | unknown protein                                                                          |
| A_84_P255500 | -1.97988 | AT5G54130.4 | calcium-binding EF hand family protein                                                   |
| A_84_P56650  | -1.97582 | AT5G41080.1 | glycerophosphoryl diester phosphodiesterase family protein                               |
| A_84_P806966 | -1.95523 | AT2G40610.1 | ATEXPA8 (ARABIDOPSIS THALIANA EXPANSIN A8)                                               |
| A_84_P18047  | -1.94184 | AT1G15100.1 | RHA2A (RING-H2 finger A2A); protein binding / zinc ion binding                           |
| A_84_P19141  | -1.94009 | AT2G47460.1 | ATMYB12/MYB12 (MYB DOMAIN PROTEIN 12)                                                    |

|              |          |             |                                                                                          |
|--------------|----------|-------------|------------------------------------------------------------------------------------------|
| A_84_P534217 | -1.93416 | AT3G48240.1 | octicosapeptide/Phox/Bem1p (PB1) domain-containing protein                               |
| A_84_P760632 | -1.93363 | AT3G59930.1 | Encodes a defensin-like (DEFL) family protein.                                           |
| A_84_P769609 | -1.92312 | AT5G53048.1 | other RNA                                                                                |
| A_84_P847367 | -1.91757 | AT1G02205.1 | CER1 (ECERIFERUM 1)                                                                      |
| A_84_P297334 | -1.91503 | AT5G25840.1 | similar to unknown protein;contains InterPro domain Protein of unknown function DUF1677  |
| A_84_P525172 | -1.89287 | AT2G33720.1 | transcription factor                                                                     |
| A_84_P23101  | -1.88669 | AT3G21890.1 | zinc finger (B-box type) family protein                                                  |
| A_84_P10158  | -1.87895 | AT5G06690.1 | (THIOREDOXIN-LIKE 5); thiol-disulfide exchange intermediate                              |
| A_84_P13690  | -1.87683 | AT3G46370.1 | leucine-rich repeat protein kinase, putative                                             |
| A_84_P803335 | -1.8731  | AT3G28007.1 | nodulin MtN3 family protein                                                              |
| A_84_P11955  | -1.85863 | AT4G26150.1 | CGA1 (CYTOKININ-RESPONSIVE GATA FACTOR 1); transcription factor                          |
| A_84_P12720  | -1.85569 | AT3G13750.1 | BGAL1 (BETA GALACTOSIDASE 1); beta-galactosidase                                         |
| A_84_P18265  | -1.84198 | AT2G18480.1 | mannitol transporter, putative                                                           |
| A_84_P610895 | -1.83617 | AT5G19970.1 | similar to unnamed protein product [Vitis vinifera] (GB:CAO65601.1)                      |
| A_84_P512287 | -1.83553 | AT5G23160.1 | similar to unknown protein(TAIR:AT5G08240.1)                                             |
| A_84_P18985  | -1.83    | AT1G11740.1 | ankyrin repeat family protein                                                            |
| A_84_P14075  | -1.82829 | AT5G57240.1 | oxysterol-binding family protein                                                         |
| A_84_P812024 | -1.81975 | AT1G28330.1 | DRM1 (DORMANCY-ASSOCIATED PROTEIN 1)                                                     |
| A_84_P556511 | -1.81787 | AT4G29110.1 | unknown protein                                                                          |
| A_84_P813233 | -1.80896 | AT4G35750.1 | Rho-GTPase-activating protein-related                                                    |
| A_84_P11098  | -1.7959  | AT5G04770.1 | ATCAT6/CAT6 (CATIONIC AMINO ACID TRANSPORTER 6)                                          |
| A_84_P21915  | -1.79211 | AT1G20190.1 | ATEXPA11 (ARABIDOPSIS THALIANA EXPANSIN A11)                                             |
| A_84_P132025 | -1.78894 | AT1G69260.1 | similar to unknown protein; contains InterPro domain Protein of unknown function DUF1675 |
| A_84_P15742  | -1.78487 | AT4G27450.1 | similar to unknown protein(TAIR:AT3G15450.1);contains domain G3DSA:3.60.20.10            |
| A_84_P16492  | -1.77886 | AT3G21150.1 | zinc finger (B-box type) family protein                                                  |
| A_84_P14783  | -1.77109 | AT4G24780.1 | pectate lyase family protein                                                             |
| A_84_P512586 | -1.76038 | AT1G53785.1 | unknown protein                                                                          |
| A_84_P532079 | -1.75554 | AT1G47510.1 | endonuclease/exonuclease/phosphatase family protein                                      |
| A_84_P218028 | -1.74395 | AT3G47640.1 | basic helix-loop-helix (bHLH) family protein                                             |
| A_84_P72554  | -1.74133 | AT1G77400.1 | similar to hydroxyproline-rich glycoprotein family protein (TAIR:AT1G21695.1)            |
| A_84_P831400 | -1.73647 | AT1G49320.1 | BURP domain-containing protein [AT1G49320.1]                                             |
| A_84_P519046 | -1.73623 | AT3G09450.1 | similar to unknown protein [Arabidopsis thaliana] (TAIR:AT2G28780.1)                     |

|              |          |             |                                                                                     |
|--------------|----------|-------------|-------------------------------------------------------------------------------------|
| A_84_P18238  | -1.7273  | AT2G22420.1 | peroxidase 17 (PER17) (P17)                                                         |
| A_84_P14701  | -1.719   | AT3G61880.1 | CYP78A9 (CYTOCHROME P450 78A9); oxygen binding                                      |
| A_84_P838948 | -1.71534 | AT1G01520.1 | myb family transcription factor                                                     |
| A_84_P130216 | -1.71276 | AT2G37750.1 | unknown protein                                                                     |
| A_84_P104886 | -1.71125 | AT5G63350.1 | similar to unknown protein [Arabidopsis thaliana] (TAIR:AT3G48510.1)                |
| A_84_P155385 | -1.70521 | AT4G17280.1 | auxin-responsive family protein                                                     |
| A_84_P602765 | -1.70502 | AT4G19900.1 | glycosyl transferase-related                                                        |
| A_84_P16776  | -1.69835 | AT5G06760.1 | late embryogenesis abundant group 1 domain-containing protein                       |
| A_84_P20803  | -1.68484 | AT1G11340.1 | S-locus lectin protein kinase family protein                                        |
| A_84_P10638  | -1.6833  | AT1G11260.1 | STP1 (SUGAR TRANSPORTER 1)                                                          |
| A_84_P16177  | -1.67878 | AT1G78440.1 | ATGA2OX1 (GIBBERELLIN 2-OXIDASE 1); gibberellin<br>2-beta-dioxygenase               |
| A_84_P69104  | -1.67667 | AT1G77145.1 | similar to unknown protein [Arabidopsis thaliana] (TAIR:AT1G77160.1)                |
| A_84_P557122 | -1.66941 | AT2G45130.1 | SPX (SYG1/Pho81/XPR1) domain-containing protein                                     |
| A_84_P23455  | -1.66873 | AT1G68620.1 | hydrolase                                                                           |
| A_84_P242573 | -1.66474 | AT5G54470.1 | zinc finger (B-box type) family protein                                             |
| A_84_P19626  | -1.66122 | AT5G10250.1 | phototropic-responsive protein, putative                                            |
| A_84_P15939  | -1.65954 | AT5G49330.1 | AtMYB111 (myb domain protein 111); DNA binding / transcription factor               |
| A_84_P759203 | -1.65837 | AT3G30730.1 | contains domain HELICASE-RELATED (PTHR10492)                                        |
| A_84_P16743  | -1.65481 | AT4G15110.1 | CYP97B3 (cytochrome P450, family 97, subfamily B, polypeptide 3);<br>oxygen binding |
| A_84_P861274 | -1.64594 | AT5G66400.1 | RAB18 (RESPONSIVE TO ABA 18)                                                        |
| A_84_P789539 | -1.64239 | AT4G06746.1 | RAP2.9 (related to AP2 9); transcription factor                                     |
| A_84_P15720  | -1.64073 | AT4G22620.1 | auxin-responsive family protein                                                     |
| A_84_P10285  | -1.63485 | AT5G54510.1 | DFL1/GH3.6 (DWARF IN LIGHT 1); indole-3-acetic acid amido synthetase                |
| A_84_P767162 | -1.63329 | AT5G38870.1 | transposable element gene                                                           |
| A_84_P141109 | -1.62852 | AT4G30410.1 | transcription factor                                                                |
| A_84_P547965 | -1.62547 | AT1G12030.1 | similar to unknown protein [Arabidopsis thaliana] (TAIR:AT1G62420.1)                |
| A_84_P20761  | -1.62478 | AT5G09220.1 | AAP2 (AMINO ACID PERMEASE 2); amino acid transmembrane<br>transporter               |
| A_84_P14131  | -1.61809 | AT5G20250.1 | DIN10 (DARK INDUCIBLE 10); hydrolase, hydrolyzing O-glycosyl<br>compounds           |
| A_84_P502404 | -1.61682 | AT4G26950.1 | similar to unknown protein [Arabidopsis thaliana] (TAIR:AT4G04630.1)                |
| A_84_P818968 | -1.61655 | AT3G15630.1 | similar to unknown protein [Arabidopsis thaliana] (TAIR:AT1G52720.1)                |
| A_84_P13597  | -1.60572 | AT3G09590.1 | pathogenesis-related protein, putative [AT3G09590.1]                                |
| A_84_P22612  | -1.59507 | AT5G62730.1 | proton-dependent oligopeptide transport (POT) family protein                        |
| A_84_P123362 | -1.58427 | AT1G13740.1 | similar to unknown protein [Arabidopsis thaliana] (TAIR:AT1G69260.1)                |

|              |          |             |                                                                                |
|--------------|----------|-------------|--------------------------------------------------------------------------------|
| A_84_P609600 | -1.57189 | AT2G40200.1 | basic helix-loop-helix (bHLH) family protein                                   |
| A_84_P16197  | -1.56396 | AT1G69530.1 | ATEXPA1 (ARABIDOPSIS THALIANA EXPANSIN A1)                                     |
| A_84_P173491 | -1.56205 | AT5G64770.1 | similar to 80C09_10 [Brassica rapa subsp. pekinensis] (GB:AAZ41821.1)          |
| A_84_P17128  | -1.55815 | AT1G69230.1 | SPIL2                                                                          |
| A_84_P21875  | -1.5501  | AT1G63180.1 | UGE3 (UDP-D-GLUCOSE/UDP-D-GALACTOSE 4-EPIMERASE 3)                             |
| A_84_P88639  | -1.54538 | AT1G79160.1 | similar to unknown protein [Arabidopsis thaliana] (TAIR:AT1G16500.1)           |
| A_84_P816014 | -1.54513 | AT4G01000.1 | ubiquitin family protein                                                       |
| A_84_P23698  | -1.53657 | AT1G22690.1 | gibberellin-responsive protein, putative                                       |
| A_84_P106882 | -1.53385 | AT1G78170.1 | similar to unknown protein [Arabidopsis thaliana] (TAIR:AT1G22250.1)           |
| A_84_P549850 | -1.52441 | AT1G60190.1 | armadillo/beta-catenin repeat family protein / U-box domain-containing protein |
| A_84_P12298  | -1.52281 | AT1G23760.1 | JP630; polygalacturonase                                                       |
| A_84_P11780  | -1.517   | AT3G28500.1 | 60S acidic ribosomal protein P2 (RPP2C)                                        |
| A_84_P288904 | -1.51584 | AT3G49570.1 | similar to unknown protein [Arabidopsis thaliana] (TAIR:AT5G24660.1)           |
| A_84_P819590 | -1.51567 | AT3G17510.1 | CIPK1 (CBL-INTERACTING PROTEIN KINASE 1); kinase                               |
| A_84_P21970  | -1.51472 | AT2G22200.1 | AP2 domain-containing transcription factor                                     |
| A_84_P79045  | -1.51274 | AT1G06980.1 | similar to unknown protein [Arabidopsis thaliana] (TAIR:AT2G30230.1)           |
| A_84_P66364  | -1.51209 | AT1G49310.1 | unknown protein                                                                |
| A_84_P90109  | -1.51201 | AT3G05800.1 | transcription factor                                                           |
| A_84_P543246 | -1.51083 | AT4G37295.1 | unknown protein                                                                |
| A_84_P15301  | -1.50649 | AT1G58340.1 | ZF14; transporter                                                              |
| A_84_P272560 | -1.5056  | AT3G12970.1 | similar to unknown protein [Arabidopsis thaliana] (TAIR:AT1G56020.1)           |
| A_84_P539913 | -1.50213 | AT5G67020.1 | similar to unknown protein [Arabidopsis thaliana] (TAIR:AT3G50340.1)           |
| A_84_P186194 | -1.49843 | AT2G35640.1 | hydroxyproline-rich glycoprotein family protein                                |
| A_84_P821066 | -1.49624 | AT5G60910.1 | AGL8 (AGAMOUS-LIKE 8); transcription factor                                    |
| A_84_P154615 | -1.49113 | AT1G76590.1 | zinc-binding family protein                                                    |
| A_84_P11605  | -1.49014 | AT2G46690.1 | auxin-responsive family protein                                                |
| A_84_P186864 | -1.48974 | AT5G03960.1 | IQD12 (IQ-domain 12); calmodulin binding                                       |
| A_84_P549446 | -1.48558 | AT4G35720.1 | similar to unknown protein [Arabidopsis thaliana] (TAIR:AT4G35690.1)           |
| A_84_P813465 | -1.48499 | AT2G15890.1 | MEE14 (maternal effect embryo arrest 14)                                       |
| A_84_P761945 | -1.48371 | AT3G61028.1 | similar to unknown protein [Arabidopsis thaliana] (TAIR:AT3G60940.1)           |
| A_84_P17398  | -1.47334 | AT3G15620.1 | UVR3 (UV REPAIR DEFECTIVE 4)                                                   |
| A_84_P21614  | -1.47011 | AT1G29600.1 | zinc finger (CCCH-type) family protein                                         |
| A_84_P20410  | -1.46638 | AT1G06080.1 | ADS1 (DELTA 9 DESATURASE 1); oxidoreductase                                    |
| A_84_P81559  | -1.46341 | AT4G33560.1 | unknown protein                                                                |
| A_84_P571865 | -1.46275 | AT3G23420.1 | F-box family protein-related                                                   |
| A_84_P17577  | -1.46269 | AT1G06180.1 | ATMYB13 (myb domain protein 13); DNA binding / transcription factor            |

|              |          |             |                                                                                    |
|--------------|----------|-------------|------------------------------------------------------------------------------------|
| A_84_P11248  | -1.46084 | AT5G59220.1 | protein phosphatase 2C, putative / PP2C, putative                                  |
| A_84_P550153 | -1.45873 | AT3G30720.1 | unknown protein                                                                    |
| A_84_P521683 | -1.4495  | AT2G46970.1 | PIL1 (PHYTOCHROME INTERACTING FACTOR 3-LIKE 1);<br>transcription factor            |
| A_84_P66984  | -1.44783 | AT1G64360.1 | unknown protein                                                                    |
| A_84_P13968  | -1.44584 | AT5G16410.1 | transferase family protein                                                         |
| A_84_P12005  | -1.43603 | AT4G38410.1 | dehydrin, putative                                                                 |
| A_84_P762845 | -1.43501 | AT3G13061.1 | other RNA                                                                          |
| A_84_P532908 | -1.43429 | AT1G16515.1 | unknown protein                                                                    |
| A_84_P12501  | -1.43344 | AT2G28200.1 | nucleic acid binding / transcription factor/ zinc ion binding                      |
| A_84_P850575 | -1.4302  | AT1G62500.1 | protease inhibitor/seed storage/lipid transfer protein (LTP) family protein        |
| A_84_P22300  | -1.42885 | AT4G08300.1 | nodulin MtN21 family protein                                                       |
| A_84_P22483  | -1.42374 | AT5G17860.1 | CAX7 (CALCIUM EXCHANGER 7); calcium:sodium antiporter/<br>cation:cation antiporter |
| A_84_P201258 | -1.42207 | AT3G16280.1 | DNA binding / transcription factor                                                 |
| A_84_P758025 | -1.4203  | AT2G13431.1 | other RNA                                                                          |
| A_84_P829388 | -1.41989 | AT1G07150.1 | MAPKKK13 (Mitogen-activated protein kinase kinase kinase 13); kinase               |
| A_84_P18467  | -1.41339 | AT3G57520.1 | ATSIP2 (ARABIDOPSIS THALIANA SEED IMBIBITION 2)                                    |
| A_84_P706132 | -1.41309 | AT1G69252.1 | other RNA [AT1G69252.1]                                                            |
| A_84_P16792  | -1.41264 | AT5G11260.1 | HY5 (ELONGATED HYPOCOTYL 5); DNA binding / transcription factor                    |
| A_84_P12165  | -1.40711 | AT5G51310.1 | gibberellin 20-oxidase-related                                                     |
| A_84_P15646  | -1.40578 | AT3G61890.1 | ATHB-12 (ARABIDOPSIS THALIANA HOMEBOX PROTEIN 12);<br>transcription factor         |
| A_84_P265830 | -1.40314 | AT4G14020.1 | rapid alkalization factor (RALF) family protein                                    |
| A_84_P22363  | -1.39841 | AT4G27360.1 | dynein light chain, putative                                                       |
| A_84_P10499  | -1.39413 | AT1G08250.1 | ADT6 (AROGENATE DEHYDRATASE 6); arogenate dehydratase/<br>prephenate dehydratase   |
| A_84_P16192  | -1.38924 | AT1G77450.1 | ANAC032 (Arabidopsis NAC domain containing protein 32); transcription<br>factor    |
| A_84_P304680 | -1.38828 | AT2G30600.1 | BTB/POZ domain-containing protein                                                  |
| A_84_P18787  | -1.38649 | AT5G52250.1 | transducin family protein / WD-40 repeat family protein                            |
| A_84_P220358 | -1.38637 | AT5G50610.1 | similar to unknown protein [Arabidopsis thaliana] (TAIR:AT5G50710.1)               |
| A_84_P764623 | -1.38626 | AT4G15248.1 | DNA binding / zinc ion binding                                                     |
| A_84_P199304 | -1.38535 | AT1G19610.1 | LCR78/PDF1.4 (Low-molecular-weight cysteine-rich 78)                               |
| A_84_P219958 | -1.38479 | AT5G42760.1 | similar to unknown [Populus trichocarpa] (GB:ABK95091.1)                           |
| A_84_P16207  | -1.38168 | AT1G68360.1 | zinc finger protein-related                                                        |
| A_84_P282890 | -1.37891 | AT5G47610.1 | zinc finger (C3HC4-type RING finger) family protein                                |

|              |          |             |                                                                                           |
|--------------|----------|-------------|-------------------------------------------------------------------------------------------|
| A_84_P21354  | -1.3759  | AT4G08290.1 | nodulin MtN21 family protein                                                              |
| A_84_P269350 | -1.36609 | AT1G58380.1 | XW6; structural constituent of ribosome                                                   |
| A_84_P808177 | -1.3634  | AT5G59320.1 | LTP3 (LIPID TRANSFER PROTEIN 3); lipid binding                                            |
| A_84_P524320 | -1.36325 | AT2G40475.1 | unknown protein                                                                           |
| A_84_P11122  | -1.35678 | AT5G11590.1 | TINY2 (TINY2); DNA binding / transcription factor                                         |
| A_84_P117132 | -1.35641 | AT5G03555.1 | permease, cytosine/purines, uracil, thiamine, allantoin family protein                    |
| A_84_P754963 | -1.35595 | AT2G15160.1 | transposable element gene                                                                 |
| A_84_P577248 | -1.35387 | AT1G10155.1 | similar to ATPP2-A9 (Phloem protein 2-A9), carbohydrate binding<br>[Arabidopsis thaliana] |
| A_84_P15250  | -1.35276 | AT1G66760.2 | MATE efflux family protein [AT1G66760.2]                                                  |
| A_84_P520558 | -1.35151 | AT1G52855.1 | similar to unknown protein [Arabidopsis thaliana] (TAIR:AT3G15534.1)                      |
| A_84_P19573  | -1.34385 | AT1G48100.1 | glycoside hydrolase family 28 protein / polygalacturonase (pectinase) family<br>protein   |
| A_84_P18028  | -1.34365 | AT1G04280.1 | similar to unknown protein [Arabidopsis thaliana] (TAIR:AT1G06750.1)                      |
| A_84_P19052  | -1.34233 | AT1G70560.1 | alliinase C-terminal domain-containing protein                                            |
| A_84_P604856 | -1.34066 | AT5G59990.1 | similar to unknown protein [Arabidopsis thaliana] (TAIR:AT5G41380.1)                      |
| A_84_P18313  | -1.3373  | AT3G10570.1 | CYP77A6 (cytochrome P450, family 77, subfamily A, polypeptide 6)                          |
| A_84_P816904 | -1.33726 | AT5G47450.1 | AtTIP2;3 (Arabidopsis thaliana tonoplast intrinsic protein 2;3)                           |
| A_84_P16227  | -1.33671 | AT1G72200.1 | zinc finger (C3HC4-type RING finger) family protein                                       |
| A_84_P23370  | -1.33349 | AT4G16680.1 | RNA helicase, putative                                                                    |
| A_84_P756272 | -1.32908 | AT2G27395.1 | pseudogene of cysteine protease-related                                                   |
| A_84_P11764  | -1.32743 | AT3G19230.1 | leucine-rich repeat family protein                                                        |
| A_84_P809041 | -1.32141 | AT2G38530.1 | LTP2 (LIPID TRANSFER PROTEIN 2); lipid binding                                            |
| A_84_P794100 | -1.31964 | AT1G19490.1 | bZIP transcription factor family protein                                                  |
| A_84_P604788 | -1.31836 | AT5G59510.1 | DVL18/RTFL5 (ROTUNDIFOLIA LIKE 5)                                                         |
| A_84_P10760  | -1.31589 | AT3G05820.1 | beta-fructofuranosidase                                                                   |
| A_84_P822179 | -1.31459 | AT5G02020.1 | similar to unknown protein [Arabidopsis thaliana] (TAIR:AT3G55646.1)                      |
| A_84_P10570  | -1.31437 | AT1G19840.1 | auxin-responsive family protein                                                           |
| A_84_P15366  | -1.31199 | AT1G11210.1 | similar to unknown protein [Arabidopsis thaliana]                                         |
| A_84_P756427 | -1.31083 | AT2G27420.1 | cysteine proteinase, putative                                                             |
| A_84_P17366  | -1.30882 | AT1G01250.1 | AP2 domain-containing transcription factor, putative                                      |
| A_84_P97886  | -1.30821 | AT2G40130.1 | heat shock protein-related                                                                |
| A_84_P803684 | -1.30526 | AT5G58550.1 | EOL2 (ETO1-LIKE 2); binding / protein binding                                             |
| A_84_P859689 | -1.30509 | AT1G75750.1 | GASA1 (GAST1 PROTEIN HOMOLOG 1)                                                           |
| A_84_P16520  | -1.30415 | AT1G02640.1 | BXL2 (BETA-XYLOSIDASE 2); hydrolase, hydrolyzing O-glycosyl<br>compounds                  |
| A_84_P233709 | -1.2967  | AT5G15190.1 | unknown protein                                                                           |

|              |          |             |                                                                                     |
|--------------|----------|-------------|-------------------------------------------------------------------------------------|
| A_84_P18773  | -1.29606 | AT5G48250.1 | zinc finger (B-box type) family protein                                             |
| A_84_P13983  | -1.29299 | AT5G24120.1 | SIGE (RNA polymerase sigma subunit E)                                               |
| A_84_P818550 | -1.29194 | AT3G21510.1 | AHP1 (HISTIDINE-CONTAINING PHOSPHOTRANSMITTER 3)                                    |
| A_84_P804030 | -1.29137 | AT3G24518.1 | other RNA                                                                           |
| A_84_P840305 | -1.28805 | AT3G28960.1 | amino acid transporter family protein                                               |
| A_84_P12951  | -1.28785 | AT4G38620.1 | MYB4 (myb domain protein 4); transcription factor                                   |
| A_84_P10141  | -1.28636 | AT5G01550.1 | lectin protein kinase, putative                                                     |
| A_84_P12184  | -1.28619 | AT5G56870.1 | BGAL4 (beta-galactosidase 4); beta-galactosidase                                    |
| A_84_P263610 | -1.28214 | AT4G14380.1 | similar to hypothetical protein [Vitis vinifera] (GB:CAN63630.1)                    |
| A_84_P10354  | -1.28177 | AT1G27940.1 | PGP13 (P-GLYCOPROTEIN 13); ATPase, coupled to transmembrane movement of substances  |
| A_84_P594805 | -1.27913 | AT4G36820.1 | transcription factor                                                                |
| A_84_P60230  | -1.2762  | AT4G39700.1 | heavy-metal-associated domain-containing protein / copper chaperone (CCH)-related   |
| A_84_P793020 | -1.27103 | AT3G03450.1 | RGL2 (RGA-LIKE 2); transcription factor                                             |
| A_84_P19729  | -1.26984 | AT5G51210.1 | OLEO3 (OLEOSIN3)                                                                    |
| A_84_P16167  | -1.26975 | AT1G22500.1 | zinc finger (C3HC4-type RING finger) family protein                                 |
| A_84_P767998 | -1.26875 | AT5G42146.1 | unknown protein                                                                     |
| A_84_P15653  | -1.26679 | AT3G63470.1 | SCPL40 (serine carboxypeptidase-like 40); serine carboxypeptidase                   |
| A_84_P577905 | -1.2667  | AT5G11460.1 | senescence-associated protein-related                                               |
| A_84_P769417 | -1.26553 | AT5G41761.1 | similar to unknown protein [Arabidopsis thaliana] (TAIR:AT3G55570.1)                |
| A_84_P92099  | -1.26412 | AT2G32880.1 | meprin and TRAF homology domain-containing protein / MATH domain-containing protein |
| A_84_P10038  | -1.26119 | AT4G20050.1 | QRT3 (QUARTET 3)                                                                    |
| A_84_P14948  | -1.25856 | AT5G37260.1 | CIR1/RVE2 (CIRCADIAN 1); DNA binding / transcription factor                         |
| A_84_P244235 | -1.25782 | AT3G20810.1 | transcription factor jumonji (jmjC) domain-containing protein                       |
| A_84_P763909 | -1.25746 | AT4G21130.1 | EMB2271 (EMBRYO DEFECTIVE 2271); nucleotide binding                                 |
| A_84_P168923 | -1.25228 | AT1G48330.1 | similar to unknown protein [Arabidopsis thaliana] (TAIR:AT3G17580.1)                |
| A_84_P20293  | -1.24836 | AT3G12500.1 | ATHCHIB (BASIC CHITINASE); chitinase                                                |
| A_84_P761538 | -1.2457  | AT3G22142.1 | structural constituent of cell wall                                                 |
| A_84_P62640  | -1.24316 | AT3G48290.1 | CYP71A24 (cytochrome P450, family 71, subfamily A, polypeptide 24); oxygen binding  |
| A_84_P22091  | -1.24209 | AT3G03470.1 | CYP89A9 (cytochrome P450, family 87, subfamily A, polypeptide 9); oxygen binding    |
| A_84_P824387 | -1.2416  | AT1G42430.1 | similar to unknown protein [Arabidopsis thaliana] (TAIR:AT3G55760.1)                |
| A_84_P21264  | -1.24023 | AT3G48360.1 | BT2 (BTB AND TAZ DOMAIN PROTEIN 2)                                                  |
| A_84_P17337  | -1.23525 | AT2G01150.1 | RHA2B (RING-H2 FINGER PROTEIN 2B); protein binding / zinc ion                       |

|              |          |             |                                                                                      |
|--------------|----------|-------------|--------------------------------------------------------------------------------------|
| A_84_P305070 | -1.23436 | AT2G15020.1 | binding                                                                              |
| A_84_P565120 | -1.22462 | AT3G08505.1 | similar to unknown protein [Arabidopsis thaliana] (TAIR:AT5G64190.1)                 |
| A_84_P15269  | -1.22186 | AT1G52890.1 | zinc finger (CCCH-type/C3HC4-type RING finger) family protein                        |
|              |          |             | ANAC019 (Arabidopsis NAC domain containing protein 19); transcription factor         |
| A_84_P14597  | -1.21788 | AT3G30460.1 | zinc finger (C3HC4-type RING finger) family protein                                  |
| A_84_P13751  | -1.21615 | AT3G60490.1 | AP2 domain-containing transcription factor TINY, putative                            |
| A_84_P281930 | -1.20817 | AT3G47820.1 | armadillo/beta-catenin repeat family protein / U-box domain-containing protein       |
| A_84_P78009  | -1.2053  | AT5G66052.1 | unknown protein                                                                      |
| A_84_P21461  | -1.20395 | AT4G38300.1 | glycosyl hydrolase family 10 protein                                                 |
| A_84_P564068 | -1.20104 | AT1G77655.1 | unknown protein                                                                      |
| A_84_P11285  | -1.20086 | AT5G14860.1 | transferase, transferring glycosyl groups                                            |
| A_84_P20676  | -1.20041 | AT5G51470.1 | auxin-responsive GH3 family protein                                                  |
| A_84_P591506 | -1.20013 | AT1G05870.1 | similar to unknown protein [Arabidopsis thaliana] (TAIR:AT2G31560.1)                 |
| A_84_P589734 | -1.19534 | AT1G13610.1 | similar to unknown protein [Arabidopsis thaliana] (TAIR:AT3G30380.1)                 |
| A_84_P24157  | -1.19446 | AT3G61250.1 | AtMYB17 (myb domain protein 17); DNA binding / transcription factor                  |
| A_84_P810724 | -1.19349 | AT1G23310.1 | GGT1 (ALANINE-2-OXOGLUTARATE AMINOTRANSFERASE 1)                                     |
| A_84_P547483 | -1.19305 | AT3G27025.1 | unknown protein                                                                      |
| A_84_P574087 | -1.19238 | AT3G21055.1 | PSBTN (photosystem II subunit T)                                                     |
| A_84_P847920 | -1.19073 | AT5G43150.1 | similar to unnamed protein product [Vitis vinifera] (GB:CAO61459.1)                  |
| A_84_P839025 | -1.18977 | AT1G70430.1 | protein kinase family protein                                                        |
| A_84_P848694 | -1.18972 | AT5G38420.1 | ribulose biphosphate carboxylase small chain 2B / RuBisCO small subunit 2B (RBCS-2B) |
| A_84_P13439  | -1.18646 | AT2G39980.1 | transferase family protein                                                           |
| A_84_P788031 | -1.18445 | AT2G46160.1 | zinc finger (C3HC4-type RING finger) family protein                                  |
| A_84_P144479 | -1.18344 | AT5G47590.1 | heat shock protein-related                                                           |
| A_84_P785451 | -1.18225 | AT4G31330.1 | similar to unknown protein [Arabidopsis thaliana] (TAIR:AT5G10580.1)                 |
| A_84_P815460 | -1.17987 | AT5G11090.1 | serine-rich protein-related                                                          |
| A_84_P20381  | -1.17673 | AT3G63110.1 | ATIPT3 (Arabidopsis thaliana isopentenyltransferase 3)                               |
| A_84_P601919 | -1.17493 | AT4G34550.1 | similar to F-box family protein [Arabidopsis thaliana] (TAIR:AT2G16365.3)            |
| A_84_P523480 | -1.17416 | AT3G07730.1 | similar to unknown protein [Arabidopsis thaliana] (TAIR:AT4G01170.1)                 |
| A_84_P16771  | -1.1736  | AT5G05290.1 | ATEXPA2 (ARABIDOPSIS THALIANA EXPANSIN A2)                                           |
| A_84_P769292 | -1.17322 | AT5G03552.1 | MIR822a; miRNA                                                                       |
| A_84_P805465 | -1.16977 | AT5G38410.2 | ribulose biphosphate carboxylase small chain 3B / RuBisCO small subunit 3B (RBCS-3B) |
| A_84_P760804 | -1.16874 | AT3G26165.1 | putative cytochrome P450                                                             |



|              |          |             |                                                                                                     |
|--------------|----------|-------------|-----------------------------------------------------------------------------------------------------|
| A_84_P752730 | -1.16085 | AT1G66725.1 | MIR163; miRNA                                                                                       |
| A_84_P16876  | -1.16071 | AT5G47050.1 | ATP binding / protein binding / shikimate kinase/ zinc ion binding                                  |
| A_84_P821803 | -1.15989 | AT4G12000.1 | similar to unknown protein [Arabidopsis thaliana] (TAIR:AT4G22850.1)                                |
| A_84_P17033  | -1.15845 | AT1G61630.1 | equilibrative nucleoside transporter, putative (ENT7)                                               |
| A_84_P12428  | -1.15547 | AT1G74010.1 | strictosidine synthase family protein                                                               |
| A_84_P17757  | -1.15399 | AT5G18670.1 | BMY3 (BETA-AMYLASE 9); beta-amylase                                                                 |
| A_84_P12256  | -1.15285 | AT1G56710.1 | glycoside hydrolase family 28 protein / polygalacturonase (pectinase) family protein                |
| A_84_P70804  | -1.15148 | AT5G63130.1 | octicosapeptide/Phox/Bem1p (PB1) domain-containing protein                                          |
| A_84_P156465 | -1.14861 | AT4G27130.1 | eukaryotic translation initiation factor SUI1, putative                                             |
| A_84_P21530  | -1.14474 | AT5G14120.1 | nodulin family protein                                                                              |
| A_84_P505410 | -1.14154 | AT1G15165.1 | U-box domain-containing protein                                                                     |
| A_84_P761565 | -1.13978 | AT3G10185.1 | Encodes a Gibberellin-regulated GASA/GAST/Snakin family protein                                     |
| A_84_P21042  | -1.13977 | AT2G41560.1 | ACA4 (AUTO-INHIBITED CA(2+)-ATPASE, ISOFORM 4)                                                      |
| A_84_P595278 | -1.13969 | AT2G04170.1 | meprin and TRAF homology domain-containing protein / MATH domain-containing protein                 |
| A_84_P534471 | -1.13868 | AT5G24655.1 | similar to unknown protein [Arabidopsis thaliana] (TAIR:AT5G24660.1)                                |
| A_84_P216728 | -1.1323  | AT1G71130.1 | AP2 domain-containing transcription factor, putative                                                |
| A_84_P21145  | -1.13142 | AT3G03480.1 | CHAT (ACETYL COA:(Z)-3-HEXEN-1-OL ACETYLTRANSFERASE)                                                |
| A_84_P820734 | -1.13061 | AT1G09250.1 | transcription factor [AT1G09250.1]                                                                  |
| A_84_P10747  | -1.12971 | AT1G53700.1 | WAG1; kinase [AT1G53700.1]                                                                          |
| A_84_P53450  | -1.12859 | AT1G79770.1 | similar to unknown protein [Arabidopsis thaliana] (TAIR:AT5G25840.1)                                |
| A_84_P298204 | -1.12821 | AT3G54260.1 | similar to unknown protein [Arabidopsis thaliana] (TAIR:AT2G42570.1)                                |
| A_84_P219828 | -1.12806 | AT5G52660.1 | myb family transcription factor                                                                     |
| A_84_P10120  | -1.12804 | AT4G39780.1 | AP2 domain-containing transcription factor, putative                                                |
| A_84_P584249 | -1.12731 | AT5G43380.1 | TOPP6 (Type one serine/threonine protein phosphatase 6); protein serine/threonine phosphatase       |
| A_84_P19306  | -1.12689 | AT3G26650.1 | GAPA (GLYCERALDEHYDE 3-PHOSPHATE DEHYDROGENASE A SUBUNIT); glyceraldehyde-3-phosphate dehydrogenase |
| A_84_P23646  | -1.12679 | AT1G23730.1 | carbonic anhydrase, putative / carbonate dehydratase, putative                                      |
| A_84_P18652  | -1.1264  | AT5G01880.1 | zinc finger (C3HC4-type RING finger) family protein                                                 |
| A_84_P821871 | -1.1261  | AT2G17730.1 | zinc finger (C3HC4-type RING finger) family protein                                                 |
| A_84_P16304  | -1.12293 | AT2G16720.1 | MYB7 (myb domain protein 7); DNA binding / transcription factor                                     |
| A_84_P549425 | -1.12201 | AT4G30230.1 | unknown protein                                                                                     |
| A_84_P725162 | -1.12199 | AT1G47271.1 | similar to CBS domain-containing protein [Arabidopsis thaliana] (TAIR:AT5G10860.1)                  |
| A_84_P789143 | -1.11989 | AT5G40730.1 | AGP24 (ARABINOGALACTAN PROTEIN 24)                                                                  |

|              |          |             |                                                                                                      |
|--------------|----------|-------------|------------------------------------------------------------------------------------------------------|
| A_84_P24028  | -1.11885 | AT3G16240.1 | DELTA-TIP (delta tonoplast integral protein); water channel                                          |
| A_84_P285230 | -1.1143  | AT1G52565.1 | similar to unknown protein [Arabidopsis thaliana] (TAIR:AT3G15760.1)                                 |
| A_84_P184024 | -1.10825 | AT2G37100.1 | protamine P1 family protein [AT2G37100.1]                                                            |
| A_84_P257260 | -1.10709 | AT2G47780.1 | rubber elongation factor (REF) protein-related                                                       |
| A_84_P15813  | -1.10605 | AT5G01640.1 | prenylated rab acceptor (PRA1) family protein                                                        |
| A_84_P20496  | -1.1047  | AT4G33040.1 | glutaredoxin family protein                                                                          |
| A_84_P819992 | -1.10377 | AT4G32340.1 | binding                                                                                              |
| A_84_P12939  | -1.10369 | AT4G34990.1 | AtMYB32 (myb domain protein 32); DNA binding / transcription factor                                  |
| A_84_P836321 | -1.10202 | AT1G27050.1 | ATHB54 (ARABIDOPSIS THALIANA HOMEODOMAIN PROTEIN 54);<br>nucleic acid binding / transcription factor |
| A_84_P14529  | -1.10194 | AT3G01970.1 | WRKY45 (WRKY DNA-binding protein 45); transcription factor                                           |
| A_84_P855736 | -1.10033 | AT1G79040.1 | PSBR (photosystem II subunit R)                                                                      |
| A_84_P20810  | -1.09913 | AT1G51340.1 | MATE efflux family protein                                                                           |
| A_84_P203128 | -1.09809 | AT3G29575.1 | similar to TMAC2 (TWO OR MORE ABRES-CONTAINING GENE 2)<br>[Arabidopsis thaliana] (TAIR:AT3G02140.1)  |
| A_84_P566580 | -1.09751 | AT1G19160.1 | F-box family protein-related                                                                         |
| A_84_P832776 | -1.09524 | AT1G05690.1 | BT3 (BTB and TAZ domain protein 3); protein binding / transcription<br>regulator                     |
| A_84_P14421  | -1.09489 | AT2G41510.1 | ATCKX1/CKX1 (CYTOKININ OXIDASE/DEHYDROGENASE 1);<br>cytokinin dehydrogenase                          |
| A_84_P13049  | -1.09487 | AT1G55850.1 | ATCSLE1 (Cellulose synthase-like E1)                                                                 |
| A_84_P14680  | -1.09484 | AT3G56380.1 | ARR17 (response regulator 17); transcription regulator/<br>two-component response regulator          |
| A_84_P175871 | -1.09296 | AT4G28290.1 | unknown protein                                                                                      |
| A_84_P12015  | -1.09243 | AT4G14580.1 | CIPK4 (CBL-INTERACTING PROTEIN KINASE 4); kinase                                                     |
| A_84_P198394 | -1.09118 | AT4G16670.1 | similar to unknown protein [Arabidopsis thaliana] (TAIR:AT4G17350.1)                                 |
| A_84_P830169 | -1.09108 | AT2G39950.1 | similar to unnamed protein product [Vitis vinifera] (GB:CAO69028.1)                                  |
| A_84_P226139 | -1.08937 | AT2G26660.1 | SPX (SYG1/Pho81/XPR1) domain-containing protein                                                      |
| A_84_P805480 | -1.08858 | AT5G38430.1 | ribulose biphosphate carboxylase small chain 1B / RuBisCO small subunit<br>1B (RBCS-1B) (ATS1B)      |
| A_84_P11378  | -1.08847 | AT1G62190.1 | small conjugating protein ligase                                                                     |
| A_84_P22366  | -1.08839 | AT4G28020.1 | similar to unnamed protein product [Vitis vinifera] (GB:CAO43327.1)                                  |
| A_84_P126821 | -1.08651 | AT2G46790.1 | APRR9 (PSEUDO-RESPONSE REGULATOR 9); transcription regulator                                         |
| A_84_P758488 | -1.08515 | AT2G18969.1 | transcription regulator                                                                              |
| A_84_P806148 | -1.08464 | AT1G67090.1 | RBCS1A; ribulose-biphosphate carboxylase                                                             |
| A_84_P187184 | -1.08441 | AT5G26280.1 | meprin and TRAF homology domain-containing protein / MATH<br>domain-containing protein               |

|              |          |             |                                                                                           |
|--------------|----------|-------------|-------------------------------------------------------------------------------------------|
| A_84_P581126 | -1.0837  | AT2G46670.1 | pseudo-response regulator, putative / timing of CAB expression 1-like protein, putative   |
| A_84_P19872  | -1.08133 | AT1G24400.1 | LHT2 (LYSINE HISTIDINE TRANSPORTER 2); amino acid transmembrane transporter               |
| A_84_P12573  | -1.07915 | AT2G44940.1 | AP2 domain-containing transcription factor TINY, putative                                 |
| A_84_P249125 | -1.07845 | AT1G68500.1 | similar to hypothetical protein [Vitis vinifera] (GB:CAN66643.1)                          |
| A_84_P13957  | -1.07785 | AT5G11650.1 | hydrolase, alpha/beta fold family protein                                                 |
| A_84_P860600 | -1.07753 | AT1G13360.1 | similar to unknown protein [Arabidopsis thaliana] (TAIR:AT3G25870.1)                      |
| A_84_P841815 | -1.07752 | AT5G09710.1 | magnesium transporter CorA-like family protein                                            |
| A_84_P21088  | -1.07737 | AT2G40670.1 | ARR16 (response regulator 16); transcription regulator/ two-component response regulator  |
| A_84_P22927  | -1.07596 | AT2G45350.1 | CRR4 (CHLORORESPIRATORY REDUCTION 4)                                                      |
| A_84_P11450  | -1.07486 | AT1G32870.1 | ANAC013 (Arabidopsis NAC domain containing protein 13); transcription factor              |
| A_84_P769282 | -1.07412 | AT5G40451.1 | similar to unknown protein [Arabidopsis thaliana] (TAIR:AT5G40450.2)                      |
| A_84_P15915  | -1.07259 | AT5G43040.1 | DC1 domain-containing protein                                                             |
| A_84_P19629  | -1.07211 | AT5G10990.1 | auxin-responsive family protein                                                           |
| A_84_P807230 | -1.07146 | AT1G20340.1 | DRT112 (DNA-damage-repair/toleration protein 112); copper ion binding / electron carrier  |
| A_84_P137739 | -1.07033 | AT3G63060.1 | EDL3 (EID1-LIKE 3)                                                                        |
| A_84_P754336 | -1.07018 | AT1G33102.1 | unknown protein                                                                           |
| A_84_P67324  | -1.06943 | AT2G25930.1 | ELF3 (EARLY FLOWERING 3)                                                                  |
| A_84_P559359 | -1.06879 | AT5G57785.1 | unknown protein                                                                           |
| A_84_P17193  | -1.06641 | AT1G12520.1 | CCS1 (copper chaperone for superoxide dismutase 1); superoxide dismutase copper chaperone |
| A_84_P525896 | -1.06422 | AT1G58235.1 | unknown protein                                                                           |
| A_84_P140389 | -1.06296 | AT2G03505.1 | glycosyl hydrolase family protein 17                                                      |
| A_84_P15400  | -1.06268 | AT2G22450.1 | riboflavin biosynthesis protein, putative                                                 |
| A_84_P17646  | -1.06191 | AT4G30170.1 | peroxidase, putative                                                                      |
| A_84_P21249  | -1.06039 | AT1G02650.1 | DNAJ heat shock N-terminal domain-containing protein                                      |
| A_84_P83919  | -1.05927 | AT2G21560.1 | similar to unknown protein [Arabidopsis thaliana] (TAIR:AT4G39190.1)                      |
| A_84_P18237  | -1.05899 | AT1G07710.1 | ankyrin repeat family protein                                                             |
| A_84_P765100 | -1.0585  | AT4G17098.1 | other RNA                                                                                 |
| A_84_P139909 | -1.05646 | AT5G49100.1 | similar to unknown protein [Arabidopsis thaliana] (TAIR:AT3G06868.1)                      |
| A_84_P11328  | -1.05492 | AT1G20470.1 | auxin-responsive family protein                                                           |
| A_84_P244005 | -1.05451 | AT3G24760.1 | F-box family protein                                                                      |
| A_84_P10660  | -1.0541  | AT2G29490.1 | ATGSTU1 (GLUTATHIONE S-TRANSFERASE 19); glutathione                                       |

|              |          |             |                                                                                                                    |
|--------------|----------|-------------|--------------------------------------------------------------------------------------------------------------------|
| A_84_P14418  | -1.05114 | AT2G40230.1 | transferase                                                                                                        |
| A_84_P751396 | -1.04699 | AT1G21470.1 | transferase family protein<br>pseudogene,putative ATP-dependent clp protease ATP-binding subunit clpa<br>precursor |
| A_84_P18956  | -1.04577 | AT1G77280.1 | protein kinase family protein                                                                                      |
| A_84_P520318 | -1.04531 | AT5G46115.1 | unknown protein                                                                                                    |
| A_84_P220638 | -1.0451  | AT3G45210.1 | similar to unknown protein [Arabidopsis thaliana] (TAIR:AT5G60680.1)                                               |
| A_84_P16262  | -1.04445 | AT1G25230.1 | purple acid phosphatase family protein                                                                             |
| A_84_P17015  | -1.04413 | AT1G02340.1 | HFR1 (LONG HYPOCOTYL IN FAR-RED); DNA binding / transcription<br>factor                                            |
| A_84_P21386  | -1.04406 | AT4G20230.1 | terpene synthase/cyclase family protein                                                                            |
| A_84_P23838  | -1.04362 | AT1G73480.1 | hydrolase, alpha/beta fold family protein                                                                          |
| A_84_P737204 | -1.04327 | AT2G05632.1 | unknown protein                                                                                                    |
| A_84_P90969  | -1.04301 | AT5G64800.1 | CLE21 (CLAVATA3/ESR-RELATED 21); receptor binding                                                                  |
| A_84_P140379 | -1.0428  | AT3G27350.1 | similar to unknown protein [Arabidopsis thaliana] (TAIR:AT5G40700.1)                                               |
| A_84_P806842 | -1.04159 | AT3G26740.1 | CCL (CCR-LIKE)                                                                                                     |
| A_84_P12465  | -1.04075 | AT1G07250.1 | UDP-glucuronosyl/UDP-glucosyl transferase family protein                                                           |
| A_84_P581112 | -1.03722 | AT2G42150.1 | DNA-binding bromodomain-containing protein                                                                         |
| A_84_P13004  | -1.03671 | AT5G09730.1 | BXL3 (BETA-XYLOSIDASE 3); hydrolase, hydrolyzing O-glycosyl<br>compounds                                           |
| A_84_P193184 | -1.03582 | AT1G26930.1 | kelch repeat-containing F-box family protein                                                                       |
| A_84_P218238 | -1.03483 | AT1G65450.1 | transferase family protein                                                                                         |
| A_84_P10657  | -1.03463 | AT2G36800.1 | DOGT1 (DON-GLUCOSYLTRANSFERASE); UDP-glycosyltransferase/<br>transferase, transferring glycosyl groups             |
| A_84_P750006 | -1.0341  | AT1G75250.1 | myb family transcription factor                                                                                    |
| A_84_P524541 | -1.03408 | AT4G11350.1 | transferase, transferring glycosyl groups                                                                          |
| A_84_P23645  | -1.03382 | AT1G23550.1 | SRO2 (SIMILAR TO RCD ONE 2); NAD <sup>+</sup> ADP-ribosyltransferase                                               |
| A_84_P21787  | -1.03244 | AT1G04570.1 | integral membrane transporter family protein                                                                       |
| A_84_P14324  | -1.03235 | AT1G52880.1 | NAM (Arabidopsis NAC domain containing protein 18); transcription factor                                           |
| A_84_P515522 | -1.03122 | AT3G14395.1 | unknown protein                                                                                                    |
| A_84_P13251  | -1.02953 | AT1G61550.1 | S-locus protein kinase, putative                                                                                   |
| A_84_P827727 | -1.0292  | AT5G56860.1 | GNC (GATA, NITRATE-INDUCIBLE, CARBON<br>METABOLISM-INVOLVED); transcription factor                                 |
| A_84_P807280 | -1.02918 | AT2G39730.1 | RCA (RUBISCO ACTIVASE)                                                                                             |
| A_84_P17678  | -1.02886 | AT4G38530.1 | ATPLC1 (PHOSPHOLIPASE C 1); phospholipase C                                                                        |
| A_84_P107652 | -1.02839 | AT2G38120.1 | AUX1 (AUXIN RESISTANT 1); amino acid transmembrane transporter/<br>transporter                                     |

|              |          |             |                                                                                                    |
|--------------|----------|-------------|----------------------------------------------------------------------------------------------------|
| A_84_P11659  | -1.02766 | AT2G39400.1 | hydrolase, alpha/beta fold family protein                                                          |
| A_84_P20359  | -1.0272  | AT3G57540.1 | remorin family protein                                                                             |
| A_84_P526889 | -1.02715 | AT2G17300.1 | similar to unknown protein [Arabidopsis thaliana] (TAIR:AT4G35320.1)                               |
| A_84_P172163 | -1.02656 | AT1G79910.1 | similar to unknown protein [Arabidopsis thaliana] (TAIR:AT1G52315.1)                               |
| A_84_P219118 | -1.02527 | AT4G38970.1 | fructose-bisphosphate aldolase, putative                                                           |
| A_84_P15232  | -1.02359 | AT1G49160.1 | WNK7 (Arabidopsis WNK kinase 7); kinase                                                            |
| A_84_P13322  | -1.01999 | AT1G21680.1 | similar to unknown protein [Arabidopsis thaliana] (TAIR:AT1G21670.1)                               |
| A_84_P15571  | -1.0198  | AT3G44240.1 | CCR4-NOT transcription complex protein, putative                                                   |
| A_84_P19956  | -1.01948 | AT1G76190.1 | auxin-responsive family protein                                                                    |
| A_84_P236133 | -1.01934 | AT1G70420.1 | similar to unknown protein [Arabidopsis thaliana] (TAIR:AT1G23710.1)                               |
| A_84_P854492 | -1.01873 | AT3G21760.1 | UDP-glucuronosyl/UDP-glucosyl transferase family protein                                           |
| A_84_P838708 | -1.01706 | AT1G20870.1 | similar to unknown protein [Arabidopsis thaliana] (TAIR:AT1G54850.1)                               |
| A_84_P11868  | -1.01567 | AT3G62260.1 | protein phosphatase 2C, putative / PP2C, putative                                                  |
| A_84_P13656  | -1.01552 | AT3G13450.1 | DIN4 (DARK INDUCIBLE 4); 3-methyl-2-oxobutanoate dehydrogenase (2-methylpropanoyl-transferring)    |
| A_84_P17919  | -1.01365 | AT5G21170.1 | 5'-AMP-activated protein kinase beta-2 subunit, putative                                           |
| A_84_P588557 | -1.01239 | AT4G36830.1 | GNS1/SUR4 membrane family protein                                                                  |
| A_84_P15920  | -1.01224 | AT5G44480.1 | DUR (DEFECTIVE UGE IN ROOT); catalytic                                                             |
| A_84_P835186 | -1.01218 | AT3G06778.1 | heat shock protein binding / unfolded protein binding                                              |
| A_84_P21670  | -1.01004 | AT5G63800.1 | BGAL6/MUM2 (MUCILAGE-MODIFIED 2); beta-galactosidase                                               |
| A_84_P590126 | -1.00967 | AT3G22540.1 | similar to unknown protein [Arabidopsis thaliana] (TAIR:AT4G14819.1)                               |
| A_84_P261020 | -1.00837 | AT3G10150.1 | ATPAP16/PAP16 (purple acid phosphatase 16); acid phosphatase/ protein serine/threonine phosphatase |
| A_84_P22367  | -1.00754 | AT4G28270.1 | zinc finger (C3HC4-type RING finger) family protein                                                |
| A_84_P65394  | -1.00731 | AT4G03420.1 | similar to unknown protein [Arabidopsis thaliana] (TAIR:AT1G03610.1)                               |
| A_84_P182154 | -1.00701 | AT5G49730.1 | ATFRO6/FRO6 (FERRIC REDUCTION OXIDASE 6); ferric-chelate reductase/ oxidoreductase                 |
| A_84_P761775 | -1.00697 | AT3G04485.1 | other RNA                                                                                          |
| A_84_P22334  | -1.00682 | AT4G20820.1 | FAD-binding domain-containing protein                                                              |
| A_84_P21850  | -1.00678 | AT1G79700.1 | ovule development protein, putative                                                                |
| A_84_P754845 | -1.00458 | AT1G15772.1 | similar to protein binding / transcription cofactor [Arabidopsis thaliana] (TAIR:AT1G15780.1)      |
| A_84_P268920 | -1.00283 | AT1G21410.1 | SKP2A; protein binding                                                                             |
| A_84_P198764 | -1.00158 | AT3G49790.1 | ATP binding                                                                                        |
| A_84_P199944 | -1.00057 | AT2G36100.1 | integral membrane family protein                                                                   |
| A_84_P849570 | -0.99901 | AT1G56220.1 | dormancy/auxin associated family protein                                                           |
| A_84_P824668 | -0.99892 | AT3G01140.1 | MYB106 (myb domain protein 106); DNA binding / transcription factor                                |

|              |          |             |                                                                                      |
|--------------|----------|-------------|--------------------------------------------------------------------------------------|
| A_84_P558950 | -0.99849 | AT3G17130.1 | invertase/pectin methylesterase inhibitor family protein                             |
| A_84_P10135  | -0.99762 | AT4G36380.1 | ROT3 (ROTUNDIFOLIA 3); oxygen binding / steroid hydroxylase                          |
| A_84_P769080 | -0.99745 | AT5G45469.1 | unknown protein                                                                      |
| A_84_P504728 | -0.99635 | AT2G18120.1 | SRS4 (SHI-RELATED SEQUENCE 4)                                                        |
| A_84_P573491 | -0.99373 | AT5G18320.1 | armadillo/beta-catenin repeat family protein / U-box domain-containing protein       |
| A_84_P23327  | -0.99317 | AT1G50640.1 | ATERF3/ERF3 (ETHYLENE RESPONSIVE ELEMENT BINDING FACTOR 3)                           |
| A_84_P292864 | -0.9931  | AT3G24460.1 | TMS membrane family protein / tumour differentially expressed (TDE) family protein   |
| A_84_P22716  | -0.99309 | AT1G23050.1 | hydroxyproline-rich glycoprotein family protein                                      |
| A_84_P16470  | -0.99209 | AT3G23000.1 | CIPK7 (CBL-INTERACTING PROTEIN KINASE 7); kinase                                     |
| A_84_P22790  | -0.99105 | AT1G11530.1 | ATCXXS1 (C-TERMINAL CYSTEINE RESIDUE IS CHANGED TO A SERINE 1)                       |
| A_84_P787853 | -0.99081 | AT3G49580.1 | similar to unknown protein [Arabidopsis thaliana] (TAIR:AT3G49570.1)                 |
| A_84_P14327  | -0.99063 | AT1G78090.1 | ATTPPB (TREHALOSE-6-PHOSPHATE PHOSPHATASE)                                           |
| A_84_P526191 | -0.98865 | AT3G28060.1 | nodulin MtN21 family protein                                                         |
| A_84_P843011 | -0.98837 | AT1G07050.1 | CONSTANS-like protein-related                                                        |
| A_84_P23377  | -0.98755 | AT4G37180.1 | myb family transcription factor                                                      |
| A_84_P18338  | -0.98616 | AT3G16770.1 | ATEBP/ERF72/RAP2.3 (RELATED TO AP2 3)                                                |
| A_84_P825052 | -0.98549 | AT1G53170.1 | ATERF-8/ATERF8 (ETHYLENE RESPONSE ELEMENT BINDING FACTOR 4)                          |
| A_84_P832965 | -0.98459 | AT2G38300.1 | DNA binding / transcription factor                                                   |
| A_84_P11250  | -0.98366 | AT5G59570.1 | myb family transcription factor                                                      |
| A_84_P272230 | -0.98304 | AT2G24540.1 | AFR (ATTENUATED FAR-RED RESPONSE)                                                    |
| A_84_P21105  | -0.98303 | AT2G19440.1 | glycosyl hydrolase family 17 protein                                                 |
| A_84_P756407 | -0.98245 | AT2G35950.1 | EDA12 (embryo sac development arrest 12)                                             |
| A_84_P757840 | -0.98208 | AT2G05995.1 | other RNA                                                                            |
| A_84_P20630  | -0.98164 | AT5G38970.1 | BR6OX1 (BRASSINOSTEROID-6-OXIDASE); oxygen binding                                   |
| A_84_P813677 | -0.9815  | AT5G66390.1 | peroxidase 72 (PER72) (P72) (PRXR8)                                                  |
| A_84_P11132  | -0.97842 | AT5G15230.1 | GASA4 (GAST1 PROTEIN HOMOLOG 4)                                                      |
| A_84_P762197 | -0.97817 | AT3G03341.1 | similar to Os01g0644200 [Oryza sativa (japonica cultivar-group)] (GB:NP_001043697.1) |
| A_84_P12440  | -0.97316 | AT1G72770.1 | HAB1 (HOMOLOGY TO ABI1); protein serine/threonine phosphatase                        |
| A_84_P857350 | -0.97294 | AT1G23130.1 | Bet v I allergen family protein                                                      |
| A_84_P21154  | -0.97246 | AT1G01390.1 | UDP-glucuronosyl/UDP-glucosyl transferase family protein                             |
| A_84_P172401 | -0.97158 | AT5G01520.1 | zinc finger (C3HC4-type RING finger) family protein                                  |

|              |          |             |                                                                                       |
|--------------|----------|-------------|---------------------------------------------------------------------------------------|
| A_84_P13573  | -0.96874 | AT3G07650.1 | COL9 (CONSTANS-LIKE 9); transcription factor/ zinc ion binding                        |
| A_84_P555274 | -0.96867 | AT2G26130.1 | zinc finger (C3HC4-type RING finger) family protein                                   |
| A_84_P756524 | -0.96866 | AT2G38980.1 | similar to fiber protein Fb12, blastp match of 53% identity and 1.2e-13 P-value to GP |
| A_84_P17099  | -0.96827 | AT1G32740.1 | protein binding / zinc ion binding                                                    |
| A_84_P762101 | -0.96713 | AT3G04184.1 | unknown protein                                                                       |
| A_84_P23668  | -0.96444 | AT1G08570.1 | thioredoxin family protein                                                            |
| A_84_P765444 | -0.96347 | AT4G35025.1 | unknown protein                                                                       |
| A_84_P18951  | -0.96261 | AT1G05170.1 | galactosyltransferase family protein                                                  |
| A_84_P181414 | -0.96189 | AT2G16380.1 | SEC14 cytosolic factor family protein / phosphoglyceride transfer family protein      |
| A_84_P10418  | -0.96158 | AT1G51440.1 | lipase class 3 family protein                                                         |
| A_84_P570494 | -0.95954 | AT3G14380.1 | integral membrane family protein                                                      |
| A_84_P15545  | -0.95862 | AT3G13380.1 | BRL3 (BRI1-LIKE 3); protein binding / protein kinase                                  |
| A_84_P23871  | -0.95837 | AT2G21220.1 | auxin-responsive protein, putative                                                    |
| A_84_P14323  | -0.9559  | AT1G70680.1 | caleosin-related family protein                                                       |
| A_84_P21687  | -0.95492 | AT1G42970.1 | GAPB (GLYCERALDEHYDE-3-PHOSPHATE DEHYDROGENASE B SUBUNIT)                             |
| A_84_P288834 | -0.95487 | AT3G59200.1 | F-box family protein                                                                  |
| A_84_P17613  | -0.95473 | AT4G22950.1 | AGL19 (AGAMOUS-LIKE 19); transcription factor                                         |
| A_84_P185484 | -0.95441 | AT5G60050.1 | PRLI-interacting factor-related                                                       |
| A_84_P307240 | -0.95406 | AT2G01670.1 | ATNUDT17 (Arabidopsis thaliana Nudix hydrolase homolog 17); hydrolase                 |
| A_84_P514938 | -0.95317 | AT5G19875.1 | similar to unknown protein [Arabidopsis thaliana] (TAIR:AT2G31940.1)                  |
| A_84_P12630  | -0.9525  | AT3G01490.1 | protein kinase, putative                                                              |
| A_84_P19986  | -0.95167 | AT1G01720.1 | ATAF1 (Arabidopsis NAC domain containing protein 2); transcription factor             |
| A_84_P761686 | -0.94996 | AT3G52605.2 | other RNA                                                                             |
| A_84_P12186  | -0.94979 | AT5G57480.1 | AAA-type ATPase family protein                                                        |
| A_84_P11078  | -0.94929 | AT4G16920.1 | disease resistance protein (TIR-NBS-LRR class), putative                              |
| A_84_P738964 | -0.94858 | AT3G63445.1 | other RNA                                                                             |
| A_84_P286640 | -0.94754 | AT3G48510.1 | similar to unknown protein [Arabidopsis thaliana] (TAIR:AT5G63350.1)                  |
| A_84_P14777  | -0.94744 | AT4G23400.1 | PIP1;5/PIP1D (plasma membrane intrinsic protein 1;5); water channel                   |
| A_84_P19130  | -0.94597 | AT2G46270.1 | GBF3 (G-BOX BINDING FACTOR 3); transcription factor                                   |
| A_84_P12331  | -0.94535 | AT1G04540.1 | C2 domain-containing protein                                                          |
| A_84_P162133 | -0.94512 | AT4G32290.1 | similar to unknown protein [Arabidopsis thaliana] (TAIR:AT5G25330.1)                  |
| A_84_P291304 | -0.94457 | AT1G29395.1 | COR414-TM1 (cold regulated 414 thylakoid membrane 1)                                  |
| A_84_P568745 | -0.94437 | AT3G27250.1 | similar to unknown protein [Arabidopsis thaliana] (TAIR:AT5G40800.1)                  |
| A_84_P13784  | -0.94426 | AT4G05130.1 | equilibrative nucleoside transporter, putative (ENT4)                                 |

|              |          |             |                                                                                          |
|--------------|----------|-------------|------------------------------------------------------------------------------------------|
| A_84_P562730 | -0.944   | AT4G38060.1 | similar to unknown protein [Arabidopsis thaliana] (TAIR:AT5G65480.1)                     |
| A_84_P18282  | -0.94311 | AT2G45800.1 | LIM domain-containing protein                                                            |
| A_84_P10829  | -0.94273 | AT3G13730.1 | CYP90D1 (CYTOCHROME P450, FAMILY 90, SUBFAMILY D, POLYPEPTIDE 1)                         |
| A_84_P21936  | -0.94204 | AT1G77330.1 | 1-aminocyclopropane-1-carboxylate oxidase, putative / ACC oxidase, putative              |
| A_84_P89919  | -0.94008 | AT2G31550.1 | GDSL-motif lipase/hydrolase family protein                                               |
| A_84_P827833 | -0.93953 | AT3G24520.1 | AT-HSFC1 (Arabidopsis thaliana heat shock transcription factor C1)                       |
| A_84_P14271  | -0.93921 | AT1G66350.1 | RGL1 (RGA-LIKE 1); transcription factor                                                  |
| A_84_P18573  | -0.93877 | AT4G26080.1 | ABI1 (ABA INSENSITIVE 1); calcium ion binding / protein serine/threonine phosphatase     |
| A_84_P751348 | -0.93829 | AT1G22370.1 | ATUGT85A5 (UDP-GLUCOSYL TRANSFERASE 85A5); transferase, transferring glycosyl groups     |
| A_84_P16938  | -0.93696 | AT5G63190.1 | MA3 domain-containing protein                                                            |
| A_84_P14874  | -0.93675 | AT1G62770.1 | invertase/pectin methylesterase inhibitor family protein                                 |
| A_84_P581411 | -0.9354  | AT4G32295.1 | similar to unknown protein [Arabidopsis thaliana] (TAIR:AT3G24150.1)                     |
| A_84_P732136 | -0.93487 | AT2G45315.2 | other RNA                                                                                |
| A_84_P10923  | -0.93386 | AT3G62550.1 | universal stress protein (USP) family protein                                            |
| A_84_P581339 | -0.93329 | AT4G12005.1 | unknown protein                                                                          |
| A_84_P819419 | -0.93263 | AT1G58602.1 | disease resistance protein (CC-NBS-LRR class), putative                                  |
| A_84_P16577  | -0.93226 | AT1G21520.1 | unknown protein                                                                          |
| A_84_P10719  | -0.93148 | AT2G01290.1 | ribose-5-phosphate isomerase                                                             |
| A_84_P18574  | -0.93122 | AT4G26220.1 | caffeoyl-CoA 3-O-methyltransferase, putative                                             |
| A_84_P506488 | -0.93083 | AT2G18440.1 | GUT15 (GENE WITH UNSTABLE TRANSCRIPT 15); other RNA                                      |
| A_84_P833445 | -0.93057 | AT1G26790.1 | Dof-type zinc finger domain-containing protein                                           |
| A_84_P753488 | -0.9295  | AT1G13448.1 | other RNA                                                                                |
| A_84_P75094  | -0.92905 | AT3G05327.1 | similar to CYCP4,1 (cyclin p4,1), cyclin-dependent protein kinase [Arabidopsis thaliana] |
| A_84_P24130  | -0.92749 | AT3G54700.1 | carbohydrate transmembrane/phosphate transmembrane/sugar:hydrogen ion symporter          |
| A_84_P540713 | -0.92614 | AT5G42825.1 | contains domain Kazal-type serine protease inhibitors (SSF100895)                        |
| A_84_P16764  | -0.926   | AT5G02750.1 | zinc finger (C3HC4-type RING finger) family protein                                      |
| A_84_P757095 | -0.92596 | AT2G12462.1 | similar to unknown protein [Arabidopsis thaliana] (TAIR:AT1G15760.1)                     |
| A_84_P15930  | -0.92479 | AT1G29460.1 | auxin-responsive protein, putative                                                       |
| A_84_P20139  | -0.92243 | AT1G19620.1 | unknown protein                                                                          |
| A_84_P22981  | -0.92193 | AT2G21880.1 | AtRABG2/AtRab7A (Arabidopsis Rab GTPase homolog G2); GTP binding                         |
| A_84_P753814 | -0.92188 | AT1G80555.1 | 3-isopropylmalate dehydrogenase/ oxidoreductase                                          |



|              |          |             |                                                                               |
|--------------|----------|-------------|-------------------------------------------------------------------------------|
| A_84_P16156  | -0.92118 | AT1G32780.1 | alcohol dehydrogenase, putative                                               |
| A_84_P172281 | -0.9208  | AT5G48850.1 | male sterility MS5 family protein                                             |
| A_84_P22510  | -0.92032 | AT5G28230.1 | pseudogene, similar to glucose-6-phosphate/phosphate-translocator precursor   |
| A_84_P14314  | -0.91968 | AT1G01380.1 | ETC1 (ENHANCER OF TRY AND CPC 1); DNA binding / transcription factor          |
| A_84_P231229 | -0.91927 | AT4G21930.1 | similar to unknown protein [Arabidopsis thaliana] (TAIR:AT1G61930.1)          |
| A_84_P254700 | -0.91776 | AT1G16500.1 | similar to unknown protein [Arabidopsis thaliana] (TAIR:AT1G79160.1)          |
| A_84_P19702  | -0.91765 | AT5G44110.1 | POP1                                                                          |
| A_84_P13475  | -0.9162  | AT2G11810.1 | MGDC (monogalactosyldiacylglycerol synthase type C)                           |
| A_84_P53580  | -0.91429 | AT5G52600.1 | AtMYB82 (myb domain protein 82); DNA binding / transcription factor           |
| A_84_P18326  | -0.91301 | AT3G08730.1 | ATPK1 (P70 RIBOSOMAL S6 KINASE); kinase/ protein binding                      |
| A_84_P11377  | -0.91228 | AT1G22890.1 | unknown protein                                                               |
| A_84_P578774 | -0.91143 | AT5G05650.1 | similar to FLA17 (FASCICLIN-LIKE ARABINOGALACTAN PROTEIN 17 PRECURSOR)        |
| A_84_P81529  | -0.9111  | AT2G43060.1 | transcription factor                                                          |
| A_84_P16544  | -0.90957 | AT3G50630.1 | ICK2/KRP2 (KIP-RELATED PROTEIN 2)                                             |
| A_84_P11841  | -0.9079  | AT3G55500.1 | ATEXPA16 (ARABIDOPSIS THALIANA EXPANSIN A16)                                  |
| A_84_P20163  | -0.90781 | AT2G38400.1 | AGT3 (ALANINE:GLYOXYLATE AMINOTRANSFERASE 3); alanine-glyoxylate transaminase |
| A_84_P585091 | -0.90667 | AT5G21910.1 | unknown protein                                                               |
| A_84_P158775 | -0.90632 | AT5G33207.1 | transposable element gene                                                     |
| A_84_P15441  | -0.90619 | AT2G18050.1 | HIS1-3 (HISTONE H1-3); DNA binding                                            |
| A_84_P10203  | -0.90599 | AT5G24390.1 | RabGAP/TBC domain-containing protein                                          |
| A_84_P183494 | -0.90463 | AT4G24700.1 | unknown protein                                                               |
| A_84_P235073 | -0.90433 | AT1G73870.1 | zinc finger (B-box type) family protein                                       |
| A_84_P282290 | -0.90259 | AT5G61340.1 | similar to unknown protein [Arabidopsis thaliana] (TAIR:AT1G26650.1)          |
| A_84_P11072  | -0.90215 | AT4G15260.1 | UDP-glucuronosyl/UDP-glucosyl transferase family protein                      |
| A_84_P761854 | -0.902   | AT3G48115.1 | other RNA                                                                     |
| A_84_P13768  | -0.90144 | AT4G00500.1 | lipase class 3 family protein / calmodulin-binding heat-shock protein-related |
| A_84_P18868  | -0.89945 | AT5G19730.1 | pectinesterase family protein                                                 |
| A_84_P104156 | -0.89901 | AT5G64230.1 | similar to unknown protein [Arabidopsis thaliana] (TAIR:AT3G19920.1)          |
| A_84_P816785 | -0.89868 | AT4G19840.1 | ATPP2-A1 (Arabidopsis thaliana phloem protein 2-A1)                           |
| A_84_P765186 | -0.89828 | AT4G37225.1 | other RNA                                                                     |
| A_84_P10157  | -0.89777 | AT5G06330.1 | hairpin-responsive protein, putative (HIN1)                                   |
| A_84_P501191 | -0.89653 | AT2G27402.1 | similar to PTAC18 (PLASTID TRANSCRIPTIONALLY ACTIVE18) [Arabidopsis thaliana] |

|              |          |             |                                                                                                  |
|--------------|----------|-------------|--------------------------------------------------------------------------------------------------|
| A_84_P14856  | -0.89607 | AT4G16480.1 | ATINT4 (INOSITOL TRANSPORTER 4)                                                                  |
| A_84_P22141  | -0.89558 | AT3G16910.1 | AAE7/ACN1 (ACYL-ACTIVATING ENZYME 7); AMP binding / acetate-CoA ligase                           |
| A_84_P138519 | -0.89513 | AT3G27220.1 | kelch repeat-containing protein                                                                  |
| A_84_P13421  | -0.89457 | AT1G71770.1 | PAB5 (POLY(A)-BINDING PROTEIN); RNA binding                                                      |
| A_84_P786987 | -0.89447 | AT1G46768.1 | RAP2.1 (related to AP2 1); DNA binding / transcription factor                                    |
| A_84_P231009 | -0.89329 | AT1G01070.1 | nodulin MtN21 family protein                                                                     |
| A_84_P23201  | -0.89244 | AT3G58720.1 | zinc finger (C3HC4-type RING finger) family protein                                              |
| A_84_P12502  | -0.89236 | AT2G25810.1 | TIP4;1 (tonoplast intrinsic protein 4;1); water channel                                          |
| A_84_P832220 | -0.89218 | AT1G04300.1 | similar to meprin and TRAF homology domain-containing protein / MATH domain-containing protein   |
| A_84_P20636  | -0.89102 | AT5G40450.1 | similar to unknown protein [Arabidopsis thaliana] (TAIR:AT3G28770.1)                             |
| A_84_P823975 | -0.89012 | AT1G69935.1 | similar to unknown protein [Arabidopsis thaliana] (TAIR:AT4G33780.1)                             |
| A_84_P22169  | -0.8893  | AT3G22530.1 | similar to unknown protein [Arabidopsis thaliana] (TAIR:AT4G14830.1)                             |
| A_84_P20373  | -0.88761 | AT3G61210.1 | embryo-abundant protein-related                                                                  |
| A_84_P15449  | -0.88755 | AT2G03500.1 | myb family transcription factor                                                                  |
| A_84_P22314  | -0.88748 | AT4G11810.1 | SPX (SYG1/Pho81/XPR1) domain-containing protein                                                  |
| A_84_P16603  | -0.88715 | AT4G00150.1 | scarecrow-like transcription factor 6 (SCL6)                                                     |
| A_84_P768720 | -0.88644 | AT5G38005.1 | other RNA                                                                                        |
| A_84_P20170  | -0.8862  | AT2G01890.1 | PAP8 (PURPLE ACID PHOSPHATASE PRECURSOR); acid phosphatase/ protein serine/threonine phosphatase |
| A_84_P55550  | -0.88564 | AT4G32280.1 | IAA29 (indoleacetic acid-induced protein 29); transcription factor                               |
| A_84_P312543 | -0.88521 | AT3G52870.1 | calmodulin-binding family protein                                                                |
| A_84_P522811 | -0.8846  | AT4G23720.1 | similar to unknown protein [Arabidopsis thaliana] (TAIR:AT4G01140.1)                             |
| A_84_P268280 | -0.88439 | AT3G50750.1 | brassinosteroid signalling positive regulator-related                                            |
| A_84_P579370 | -0.88394 | AT3G04960.1 | similar to unknown protein [Arabidopsis thaliana] (TAIR:AT4G27980.1)                             |
| A_84_P849515 | -0.88382 | AT1G26665.1 | similar to RNA polymerase II mediator complex protein-related                                    |
| A_84_P16440  | -0.88325 | AT3G04140.1 | ankyrin repeat family protein                                                                    |
| A_84_P612892 | -0.88305 | AT1G17665.1 | similar to CA-responsive protein [Brassica oleracea] (GB:ABB83615.1)                             |
| A_84_P19566  | -0.88218 | AT4G37580.1 | HLS1 (HOOKLESS 1); N-acetyltransferase                                                           |
| A_84_P867087 | -0.88094 | AT5G54930.1 | AT hook motif-containing protein                                                                 |
| A_84_P751557 | -0.88072 | AT1G19560.1 | pseudogene, putative CHP-rich zinc finger protein                                                |
| A_84_P836743 | -0.88001 | AT2G33810.1 | SPL3 (SQUAMOSA PROMOTER BINDING PROTEIN-LIKE 3); transcription factor                            |
| A_84_P754489 | -0.87962 | AT1G49032.1 | unknown protein                                                                                  |
| A_84_P797883 | -0.87934 | AT3G18290.1 | EMB2454 (EMBRYO DEFECTIVE 2454); protein binding / zinc ion binding                              |

|              |          |             |                                                                                    |
|--------------|----------|-------------|------------------------------------------------------------------------------------|
| A_84_P59780  | -0.878   | AT1G18810.1 | phytochrome kinase substrate-related                                               |
| A_84_P805132 | -0.87794 | AT2G28190.1 | CSD2 (COPPER/ZINC SUPEROXIDE DISMUTASE 2); copper, zinc superoxide dismutase       |
| A_84_P561670 | -0.87666 | AT3G47295.1 | unknown protein [                                                                  |
| A_84_P10697  | -0.87633 | AT2G37360.1 | ABC transporter family protein                                                     |
| A_84_P157885 | -0.87549 | AT4G39320.1 | microtubule-associated protein-related                                             |
| A_84_P544283 | -0.87544 | AT5G48175.1 | unknown protein                                                                    |
| A_84_P173831 | -0.87427 | AT1G29195.1 | similar to unknown protein [Arabidopsis thaliana] (TAIR:AT2G30230.1)               |
| A_84_P58590  | -0.87385 | AT3G52740.1 | similar to unknown protein [Arabidopsis thaliana] (TAIR:AT3G44450.1)               |
| A_84_P831180 | -0.8733  | AT1G77680.1 | ribonuclease II family protein                                                     |
| A_84_P544867 | -0.87159 | AT3G50510.1 | LBD28 (LOB DOMAIN-CONTAINING PROTEIN 28)                                           |
| A_84_P17061  | -0.86969 | AT1G09570.1 | PHYA (PHYTOCHROME A); G-protein coupled photoreceptor/ signal transducer           |
| A_84_P15484  | -0.8663  | AT3G10910.1 | zinc finger (C3HC4-type RING finger) family protein                                |
| A_84_P209848 | -0.86607 | AT1G21460.1 | nodulin MtN3 family protein                                                        |
| A_84_P578752 | -0.86489 | AT4G37685.1 | unknown protein                                                                    |
| A_84_P530420 | -0.86488 | AT2G03330.1 | similar to unknown protein [Arabidopsis thaliana] (TAIR:AT3G11810.1)               |
| A_84_P262520 | -0.86451 | AT5G55620.1 | similar to unknown protein [Arabidopsis thaliana] (TAIR:AT3G09950.1)               |
| A_84_P19563  | -0.86416 | AT4G35970.1 | APX5; L-ascorbate peroxidase/ peroxidase                                           |
| A_84_P22107  | -0.86358 | AT3G11930.1 | universal stress protein (USP) family protein                                      |
| A_84_P22259  | -0.86287 | AT1G05770.1 | jacalin lectin family protein                                                      |
| A_84_P22105  | -0.86278 | AT3G04030.1 | myb family transcription factor                                                    |
| A_84_P21177  | -0.86262 | AT3G17611.1 | rhomboid family protein / zinc finger protein-related                              |
| A_84_P842079 | -0.86236 | AT1G67195.2 | MIR414                                                                             |
| A_84_P859685 | -0.86192 | AT1G68670.1 | myb family transcription factor                                                    |
| A_84_P750390 | -0.86167 | AT1G68800.1 | BRC2/TCP12 (BRANCHED2); transcription factor                                       |
| A_84_P18085  | -0.8615  | AT1G60950.1 | FED A (FERREDOXIN 2)                                                               |
| A_84_P15151  | -0.86136 | AT1G24130.1 | transducin family protein / WD-40 repeat family protein                            |
| A_84_P21474  | -0.86095 | AT4G15380.1 | CYP705A4 (cytochrome P450, family 705, subfamily A, polypeptide 4); oxygen binding |
| A_84_P810056 | -0.86061 | AT5G46730.1 | glycine-rich protein                                                               |
| A_84_P198594 | -0.85997 | AT1G11850.1 | unknown protein                                                                    |
| A_84_P18056  | -0.85893 | AT1G77870.1 | MUB5 (MEMBRANE-ANCHORED UBIQUITIN-FOLD PROTEIN 5 PRECURSOR)                        |
| A_84_P829583 | -0.85846 | AT2G37400.1 | chloroplast lumen common family protein                                            |
| A_84_P18928  | -0.85834 | AT1G77020.1 | DNAJ heat shock N-terminal domain-containing protein                               |
| A_84_P15225  | -0.85758 | AT1G08170.1 | histone H2B family protein                                                         |

|              |          |             |                                                                                                   |
|--------------|----------|-------------|---------------------------------------------------------------------------------------------------|
| A_84_P20262  | -0.85738 | AT1G12790.1 | similar to unnamed protein product [ <i>Vitis vinifera</i> ] (GB:CAO44590.1)                      |
| A_84_P82909  | -0.85576 | AT1G17830.1 | similar to unknown protein [ <i>Arabidopsis thaliana</i> ] (TAIR:AT1G73210.1)                     |
| A_84_P23850  | -0.85425 | AT2G43520.1 | ATTI2 (ARABIDOPSIS THALIANA TRYPSIN INHIBITOR PROTEIN 2);<br>trypsin inhibitor                    |
| A_84_P23152  | -0.85374 | AT3G47380.1 | invertase/pectin methylesterase inhibitor family protein                                          |
| A_84_P14899  | -0.85319 | AT5G10930.1 | CIPK5 (CBL-INTERACTING PROTEIN KINASE 5); kinase                                                  |
| A_84_P757683 | -0.85276 | AT2G10606.1 | MIR396A; miRNA                                                                                    |
| A_84_P786068 | -0.85227 | AT3G23430.1 | PHO1 (PHOSPHATE 1)                                                                                |
| A_84_P124012 | -0.85216 | AT5G26790.1 | unknown protein                                                                                   |
| A_84_P17237  | -0.85195 | AT1G64140.1 | similar to loricrin-related [ <i>Arabidopsis thaliana</i> ] (TAIR:AT5G64550.1)                    |
| A_84_P860770 | -0.85094 | AT1G34640.1 | similar to Os07g0622900 [ <i>Oryza sativa</i> (japonica cultivar-group)]<br>(GB:NP_001060318.1)   |
| A_84_P284470 | -0.85046 | AT5G05250.1 | similar to unknown protein [ <i>Arabidopsis thaliana</i> ] (TAIR:AT3G56360.1)                     |
| A_84_P808561 | -0.85044 | AT5G28450.1 | chlorophyll A-B binding protein, chloroplast, putative / LHCI type II CAB,<br>putative            |
| A_84_P20700  | -0.85029 | AT5G58580.1 | ATL63; protein binding / zinc ion binding                                                         |
| A_84_P14999  | -0.85008 | AT1G64370.1 | unknown protein                                                                                   |
| A_84_P785913 | -0.84947 | AT4G16490.1 | armadillo/beta-catenin repeat family protein                                                      |
| A_84_P275730 | -0.84938 | AT3G02140.1 | TMAC2 (TWO OR MORE ABRES-CONTAINING GENE 2)                                                       |
| A_84_P569772 | -0.84841 | AT4G16447.1 | unknown protein                                                                                   |
| A_84_P537376 | -0.84727 | AT1G29420.1 | similar to SAUR68 (SMALL AUXIN UPREGULATED 68) [ <i>Arabidopsis thaliana</i> ] (TAIR:AT1G29510.1) |
| A_84_P19211  | -0.84704 | AT2G24520.1 | AHA5 (ARABIDOPSIS H(+)-ATPASE 5); ATPase                                                          |
| A_84_P14091  | -0.84672 | AT5G60890.1 | ATMYB34/ATR1/MYB34 (ALTERED TRYPTOPHAN REGULATION,<br>MYB DOMAIN PROTEIN 34)                      |
| A_84_P22073  | -0.84538 | AT2G22800.1 | HAT9 (homeobox-leucine zipper protein 9); DNA binding / transcription<br>factor                   |
| A_84_P22071  | -0.84503 | AT2G29940.1 | ATPDR3/PDR3 (PLEIOTROPIC DRUG RESISTANCE 3)                                                       |
| A_84_P753009 | -0.84491 | AT1G69587.1 | other RNA                                                                                         |
| A_84_P821615 | -0.84478 | AT3G24927.1 | pseudogene of unknown protein                                                                     |
| A_84_P19485  | -0.84469 | AT4G17880.1 | basic helix-loop-helix (bHLH) family protein                                                      |
| A_84_P16280  | -0.84455 | AT2G19980.1 | allergen V5/Tpx-1-related family protein                                                          |
| A_84_P757754 | -0.84423 | AT2G31585.1 | other RNA                                                                                         |
| A_84_P16852  | -0.84388 | AT5G40390.1 | SIP1 (SEED IMBIBITION 1-LIKE)                                                                     |
| A_84_P804582 | -0.84295 | AT2G36120.1 | pseudogene, glycine-rich protein                                                                  |
| A_84_P12750  | -0.84192 | AT3G47430.1 | PEX11B                                                                                            |
| A_84_P16407  | -0.841   | AT3G01310.1 | acid phosphatase/ oxidoreductase/ transition metal ion binding                                    |

|              |          |             |                                                                                              |
|--------------|----------|-------------|----------------------------------------------------------------------------------------------|
| A_84_P512824 | -0.83956 | AT3G06870.1 | proline-rich family protein                                                                  |
| A_84_P20862  | -0.83903 | AT1G02030.1 | zinc finger (C2H2 type) family protein                                                       |
| A_84_P19943  | -0.83849 | AT1G49450.1 | transducin family protein / WD-40 repeat family protein                                      |
| A_84_P517562 | -0.83822 | AT5G04045.1 | Expressed protein                                                                            |
| A_84_P21822  | -0.83796 | AT1G21000.1 | zinc-binding family protein                                                                  |
| A_84_P11127  | -0.83776 | AT5G13630.1 | GUN5 (GENOMES UNCOUPLED 5)                                                                   |
| A_84_P20176  | -0.83743 | AT2G44790.1 | UCC2 (UCLACYANIN 2); copper ion binding                                                      |
| A_84_P759366 | -0.83722 | AT3G03700.1 | similar to unknown protein [Arabidopsis thaliana] (TAIR:AT3G04440.1)                         |
| A_84_P20015  | -0.83716 | AT1G33430.1 | galactosyltransferase family protein                                                         |
| A_84_P15840  | -0.83697 | AT1G31290.1 | PAZ domain-containing protein / piwi domain-containing protein                               |
| A_84_P13976  | -0.83612 | AT5G19120.1 | aspartic-type endopeptidase/ pepsin A                                                        |
| A_84_P849302 | -0.83519 | AT4G26795.1 | other RNA                                                                                    |
| A_84_P19660  | -0.8344  | AT5G24870.1 | zinc finger (C3HC4-type RING finger) family protein                                          |
| A_84_P729570 | -0.83398 | AT5G02880.1 | UPL4 (ubiquitin-protein ligase 4)                                                            |
| A_84_P19080  | -0.8337  | AT1G19700.1 | BEL10/BLH10A (BEL1-LIKE HOMEODOMAIN 10); DNA binding / transcription factor                  |
| A_84_P16592  | -0.83331 | AT3G61900.1 | auxin-responsive family protein                                                              |
| A_84_P16055  | -0.83297 | AT1G35612.1 | transposable element gene                                                                    |
| A_84_P542156 | -0.8328  | AT3G27270.1 | similar to DNA-binding storekeeper protein-related [Arabidopsis thaliana] (TAIR:AT5G14280.1) |
| A_84_P19240  | -0.83257 | AT2G47150.1 | short-chain dehydrogenase/reductase (SDR) family protein                                     |
| A_84_P237873 | -0.83201 | AT5G04310.1 | pectate lyase family protein                                                                 |
| A_84_P15979  | -0.83196 | AT5G60270.1 | lectin protein kinase family protein                                                         |
| A_84_P18219  | -0.8314  | AT1G04770.1 | male sterility MS5 family protein                                                            |
| A_84_P755262 | -0.83121 | AT2G18260.1 | SYP112 (syntaxin 112); SNAP receptor                                                         |
| A_84_P513598 | -0.83099 | AT2G22122.1 | unknown protein                                                                              |
| A_84_P808897 | -0.83084 | AT5G66570.1 | OE33/OEE1/OEE33/PSBO-1/PSBO1 (OXYGEN-EVOLVING ENHANCER 33); oxygen evolving/ poly(U) binding |
| A_84_P11180  | -0.83076 | AT5G40330.1 | MYB23 (myb domain protein 23); DNA binding / transcription factor                            |
| A_84_P22243  | -0.83027 | AT3G55700.1 | UDP-glucuronosyl/UDP-glucosyl transferase family protein                                     |
| A_84_P15323  | -0.83024 | AT1G32240.1 | KAN2 (KANADI 2); DNA binding / transcription factor                                          |
| A_84_P23442  | -0.8302  | AT5G24380.1 | YSL2 (YELLOW STRIPE LIKE 2); oligopeptide transporter                                        |
| A_84_P11233  | -0.82959 | AT1G33050.1 | similar to unknown protein [Arabidopsis thaliana] (TAIR:AT4G10470.1)                         |
| A_84_P854032 | -0.82912 | AT1G10060.1 | ATBCAT-1; branched-chain-amino-acid transaminase/ catalytic                                  |
| A_84_P522030 | -0.82882 | AT5G14110.1 | similar to unknown protein [Arabidopsis thaliana] (TAIR:AT3G01950.1)                         |
| A_84_P756672 | -0.82842 | AT2G32690.1 | pseudogene, glycine-rich protein                                                             |
| A_84_P10347  | -0.82809 | AT5G17600.1 | zinc finger (C3HC4-type RING finger) family protein                                          |

|              |          |             |                                                                                         |
|--------------|----------|-------------|-----------------------------------------------------------------------------------------|
| A_84_P298514 | -0.82784 | AT5G40690.1 | similar to unknown protein [Arabidopsis thaliana] (TAIR:AT2G41730.1)                    |
| A_84_P598586 | -0.82707 | AT5G66620.1 | LIM domain-containing protein                                                           |
| A_84_P22519  | -0.82696 | AT5G38130.1 | transferase family protein                                                              |
| A_84_P11862  | -0.82624 | AT3G60690.1 | auxin-responsive family protein                                                         |
| A_84_P177214 | -0.82561 | AT5G19600.1 | SULTR3;5; sulfate transmembrane transporter                                             |
| A_84_P11687  | -0.82546 | AT3G01350.1 | proton-dependent oligopeptide transport (POT) family protein                            |
| A_84_P19801  | -0.82359 | AT5G17040.1 | UDP-glucuronosyl/UDP-glucosyl transferase family protein                                |
| A_84_P567922 | -0.82343 | AT3G59250.1 | F-box family protein                                                                    |
| A_84_P764211 | -0.82296 | AT4G04692.1 | pseudogene of unknown protein                                                           |
| A_84_P501033 | -0.82265 | AT1G50830.1 | similar to unknown protein [Arabidopsis thaliana] (TAIR:AT1G51538.1)                    |
| A_84_P758588 | -0.82073 | AT2G30766.1 | unknown protein                                                                         |
| A_84_P824195 | -0.82005 | AT2G23690.1 | similar to unknown protein [Arabidopsis thaliana] (TAIR:AT4G37240.1)                    |
| A_84_P756412 | -0.81865 | AT2G15030.1 | pseudogene, similar to LD40380p, blastp match of 31% identity and 2.1e-06 P-value to GP |
| A_84_P17183  | -0.81749 | AT1G67070.1 | DIN9 (DARK INDUCIBLE 9); mannose-6-phosphate isomerase                                  |
| A_84_P23231  | -0.81732 | AT4G01970.1 | ATSTS (ARABIDOPSIS THALIANA STACHYOSE SYNTHASE)                                         |
| A_84_P833368 | -0.81711 | AT4G25270.1 | pentatricopeptide (PPR) repeat-containing protein                                       |
| A_84_P241489 | -0.81709 | AT4G24130.1 | similar to unknown protein [Arabidopsis thaliana] (TAIR:AT1G56580.1)                    |
| A_84_P12783  | -0.81692 | AT3G54990.1 | SMZ (SCHLAFMUTZE); DNA binding / transcription factor                                   |
| A_84_P517340 | -0.81533 | AT3G24140.1 | FMA (FAMA); DNA binding / transcription activator/ transcription factor                 |
| A_84_P832800 | -0.81503 | AT4G35270.1 | RWP-RK domain-containing protein                                                        |
| A_84_P761356 | -0.81477 | AT3G61898.1 | unknown protein                                                                         |
| A_84_P19925  | -0.81452 | AT1G03020.1 | glutaredoxin family protein                                                             |
| A_84_P12478  | -0.81403 | AT1G54260.1 | histone H1/H5 family protein                                                            |
| A_84_P297344 | -0.81395 | AT5G23240.1 | DNAJ heat shock N-terminal domain-containing protein                                    |
| A_84_P18601  | -0.81381 | AT4G32260.1 | ATP synthase family                                                                     |
| A_84_P23898  | -0.81318 | AT2G46660.1 | CYP78A6 (cytochrome P450, family 78, subfamily A, polypeptide 6); oxygen binding        |
| A_84_P756471 | -0.8115  | AT2G29280.1 | pseudogene, tropinone reductase, blastp match of 46% identity and 2.4e-09 P-value to SP |
| A_84_P23522  | -0.81114 | AT5G53970.1 | aminotransferase, putative                                                              |
| A_84_P16077  | -0.81037 | AT1G05100.1 | MAPKKK18 (Mitogen-activated protein kinase kinase kinase 18); kinase                    |
| A_84_P11008  | -0.80998 | AT4G25750.1 | ABC transporter family protein                                                          |
| A_84_P16672  | -0.80946 | AT4G24140.1 | hydrolase, alpha/beta fold family protein                                               |
| A_84_P117182 | -0.80938 | AT3G05890.1 | RCI2B (RARE-COLD-INDUCIBLE 2B)                                                          |
| A_84_P569474 | -0.80935 | AT2G27385.1 | similar to unknown protein [Arabidopsis thaliana] (TAIR:AT5G22430.1)                    |
| A_84_P106762 | -0.80932 | AT3G25930.1 | universal stress protein (USP) family protein                                           |

|              |          |             |                                                                                                      |
|--------------|----------|-------------|------------------------------------------------------------------------------------------------------|
| A_84_P147888 | -0.80919 | AT4G23450.1 | zinc finger (C3HC4-type RING finger) family protein                                                  |
| A_84_P835999 | -0.80896 | AT1G59740.1 | proton-dependent oligopeptide transport (POT) family protein                                         |
| A_84_P533306 | -0.80842 | AT3G25855.1 | metal ion binding                                                                                    |
| A_84_P842252 | -0.80803 | AT1G19640.1 | JMT (JASMONIC ACID CARBOXYL METHYLTRANSFERASE);<br>jasmonate O-methyltransferase                     |
| A_84_P300900 | -0.80768 | AT2G17470.1 | similar to unknown protein [Arabidopsis thaliana] (TAIR:AT1G25480.1)                                 |
| A_84_P519526 | -0.80685 | AT3G22100.1 | basic helix-loop-helix (bHLH) family protein                                                         |
| A_84_P750667 | -0.80532 | AT1G11540.1 | similar to unknown protein [Arabidopsis thaliana] (TAIR:AT1G61740.1)                                 |
| A_84_P12302  | -0.8053  | AT1G62510.1 | protease inhibitor/seed storage/lipid transfer protein (LTP) family protein                          |
| A_84_P63754  | -0.8052  | AT5G54585.1 | unknown protein                                                                                      |
| A_84_P863936 | -0.80403 | AT1G76930.1 | ATEXT4 (EXTENSIN 4)                                                                                  |
| A_84_P16596  | -0.80356 | AT3G62820.1 | invertase/pectin methylesterase inhibitor family protein                                             |
| A_84_P756973 | -0.80331 | AT2G04032.1 | ZIP7 (ZINC TRANSPORTER 7 PRECURSOR); cation transmembrane transporter                                |
| A_84_P14587  | -0.80245 | AT3G14440.1 | NCED3 (NINE-CIS-EPOXYCAROTENOID DIOXYGENASE3)                                                        |
| A_84_P830421 | -0.80128 | AT1G26150.1 | protein kinase                                                                                       |
| A_84_P21451  | -0.80104 | AT4G35090.1 | CAT2 (CATALASE 2); catalase                                                                          |
| A_84_P590959 | -0.8009  | AT3G03180.1 | Got1-like family protein                                                                             |
| A_84_P838015 | -0.80072 | AT4G02760.1 | F-box family protein                                                                                 |
| A_84_P21871  | -0.80038 | AT1G66540.1 | cytochrome P450, putative                                                                            |
| A_84_P14585  | -0.79894 | AT3G16800.1 | protein phosphatase 2C, putative / PP2C, putative                                                    |
| A_84_P12029  | -0.79823 | AT4G37220.1 | stress-responsive protein, putative                                                                  |
| A_84_P11528  | -0.79707 | AT1G76130.1 | AMY2/ATAMY2 (ALPHA-AMYLASE-LIKE 2); alpha-amylase                                                    |
| A_84_P537852 | -0.79638 | AT4G14830.1 | similar to unknown protein [Arabidopsis thaliana] (TAIR:AT3G22530.1)                                 |
| A_84_P826352 | -0.79635 | AT1G16750.1 | similar to unknown protein [Arabidopsis thaliana] (TAIR:AT3G13000.2)                                 |
| A_84_P286060 | -0.7958  | AT5G04880.1 | pseudogene of ABC transporter family protein                                                         |
| A_84_P18803  | -0.79543 | AT5G57050.1 | ABI2 (ABA INSENSITIVE 2); protein serine/threonine phosphatase                                       |
| A_84_P19988  | -0.79493 | AT1G12780.1 | UGE1 (UDP-D-GLUCOSE/UDP-D-GALACTOSE 4-EPIMERASE 1);<br>UDP-glucose 4-epimerase/ protein dimerization |
| A_84_P22462  | -0.79318 | AT5G09930.1 | ATGCN2 (Arabidopsis thaliana general control non-repressible 2)                                      |
| A_84_P822806 | -0.79251 | AT1G03610.1 | similar to unknown protein [Arabidopsis thaliana] (TAIR:AT4G03420.1)                                 |
| A_84_P188714 | -0.79218 | AT3G06390.1 | integral membrane family protein                                                                     |
| A_84_P13409  | -0.79218 | AT1G17090.1 | unknown protein                                                                                      |
| A_84_P858602 | -0.79146 | AT3G12710.1 | methyladenine glycosylase family protein                                                             |
| A_84_P15705  | -0.79132 | AT4G18830.1 | ATOF5/OPF5 (ARABIDOPSIS THALIANA OVATE FAMILY<br>PROTEIN 5)                                          |
| A_84_P206348 | -0.79027 | AT1G60060.1 | similar to unknown protein [Arabidopsis thaliana] (TAIR:AT5G53900.2)                                 |

|              |          |             |                                                                                     |
|--------------|----------|-------------|-------------------------------------------------------------------------------------|
| A_84_P753485 | -0.79025 | AT1G80325.2 | other RNA                                                                           |
| A_84_P10694  | -0.78996 | AT2G37640.1 | ATEXPA3 (ARABIDOPSIS THALIANA EXPANSIN A3)                                          |
| A_84_P23348  | -0.78987 | AT4G36230.1 | pseudogene, glycine-rich protein, glycine-rich protein GRP22, rape, PIR2:S31415     |
| A_84_P12061  | -0.78899 | AT5G10170.1 | inositol-3-phosphate synthase                                                       |
| A_84_P249725 | -0.78893 | AT2G42620.1 | MAX2 (MORE AXILLARY BRANCHES 2); ubiquitin-protein ligase                           |
| A_84_P847119 | -0.78826 | AT5G62360.1 | invertase/pectin methylesterase inhibitor family protein                            |
| A_84_P20354  | -0.78802 | AT3G56300.1 | tRNA synthetase class I (C) family protein                                          |
| A_84_P21865  | -0.78764 | AT1G76570.1 | chlorophyll A-B binding family protein                                              |
| A_84_P22325  | -0.78723 | AT4G18450.1 | ethylene-responsive factor, putative                                                |
| A_84_P61190  | -0.7863  | AT1G18610.1 | kelch repeat-containing protein                                                     |
| A_84_P22769  | -0.78593 | AT1G11700.1 | similar to unknown protein [Arabidopsis thaliana] (TAIR:AT1G61930.1)                |
| A_84_P597346 | -0.7855  | AT3G58350.1 | meprin and TRAF homology domain-containing protein / MATH domain-containing protein |
| A_84_P791069 | -0.78536 | AT5G58340.1 | DNA binding                                                                         |
| A_84_P20653  | -0.78501 | AT5G45220.1 | Toll-Interleukin-Resistance (TIR) domain-containing protein                         |
| A_84_P823664 | -0.78469 | AT1G08550.1 | NPQ1 (NON-PHOTOCHEMICAL QUENCHING 1)                                                |
| A_84_P11917  | -0.78297 | AT4G13180.1 | short-chain dehydrogenase/reductase (SDR) family protein                            |
| A_84_P14852  | -0.7818  | AT4G15300.1 | CYP702A2 (cytochrome P450, family 702, subfamily A, polypeptide 2); oxygen binding  |
| A_84_P225469 | -0.78102 | AT5G52420.1 | similar to unknown protein [Arabidopsis thaliana] (TAIR:AT5G23920.1)                |
| A_84_P188764 | -0.78055 | AT4G04330.1 | similar to unnamed protein product [Vitis vinifera] (GB:CAO69665.1)                 |
| A_84_P235463 | -0.78049 | AT3G20450.1 | similar to unknown protein [Arabidopsis thaliana] (TAIR:AT1G11905.1)                |
| A_84_P564195 | -0.78014 | AT2G42900.1 | similar to unnamed protein product [Vitis vinifera] (GB:CAO70018.1)                 |
| A_84_P534522 | -0.77966 | AT5G48485.1 | DIR1 (DEFECTIVE IN INDUCED RESISTANCE 1); lipid binding                             |
| A_84_P10804  | -0.77947 | AT1G26770.1 | ATEXPA10 (ARABIDOPSIS THALIANA EXPANSIN A10)                                        |
| A_84_P19587  | -0.77887 | AT1G19370.1 | similar to unknown protein [Arabidopsis thaliana] (TAIR:AT1G75140.1)                |
| A_84_P21592  | -0.7785  | AT5G43500.1 | ATARP9 (ACTIN-RELATED PROTEIN 9); protein binding                                   |
| A_84_P10472  | -0.77782 | AT1G79460.1 | GA2 (GA REQUIRING 2); ent-kaurene synthase                                          |
| A_84_P20525  | -0.77636 | AT4G14480.1 | protein kinase family protein                                                       |
| A_84_P255130 | -0.77593 | AT1G04800.1 | glycine-rich protein                                                                |
| A_84_P163753 | -0.77523 | AT1G28960.1 | ATNUDT15 (ARABIDOPSIS THALIANA NUDIX HYDROLASE HOMOLOG 15); hydrolase               |
| A_84_P124232 | -0.77471 | AT2G28420.1 | lactoylglutathione lyase family protein / glyoxalase I family protein               |
| A_84_P281740 | -0.77448 | AT1G78070.1 | WD-40 repeat family protein                                                         |
| A_84_P10083  | -0.77404 | AT4G30290.1 | ATXTH19 (XYLOGLUCAN ENDOTRANSGLUCOSYLASE/HYDROLASE 19); hydrolase, acting on        |



|              |          |             |                                                                                                                                         |
|--------------|----------|-------------|-----------------------------------------------------------------------------------------------------------------------------------------|
| A_84_P125091 | -0.77397 | AT3G04860.1 | glycosyl bonds                                                                                                                          |
| A_84_P19003  | -0.77344 | AT1G02950.1 | similar to unknown protein [Arabidopsis thaliana] (TAIR:AT5G28150.1)<br>ATGSTF4 (GLUTATHIONE S-TRANSFERASE 31); glutathione transferase |
| A_84_P15302  | -0.77307 | AT1G20010.1 | TUB5 (tubulin beta-5 chain)                                                                                                             |
| A_84_P813422 | -0.77106 | AT3G48740.1 | nodulin MtN3 family protein                                                                                                             |
| A_84_P753197 | -0.77095 | AT1G44191.1 | DNA binding / ligand-dependent nuclear receptor                                                                                         |
| A_84_P564098 | -0.76958 | AT2G14247.1 | Expressed protein                                                                                                                       |
| A_84_P17510  | -0.76931 | AT1G23870.1 | ATTPS9 (Arabidopsis thaliana trehalose-phosphatase/synthase 9)                                                                          |
| A_84_P56060  | -0.76875 | AT4G05150.1 | octicosapeptide/Phox/Bem1p (PB1) domain-containing protein                                                                              |
| A_84_P786342 | -0.76835 | AT5G24735.1 | other RNA                                                                                                                               |
| A_84_P590067 | -0.76815 | AT3G05340.1 | pentatricopeptide (PPR) repeat-containing protein                                                                                       |
| A_84_P21407  | -0.76786 | AT4G25260.1 | invertase/pectin methylesterase inhibitor family protein                                                                                |
| A_84_P858244 | -0.76764 | AT1G23040.1 | hydroxyproline-rich glycoprotein family protein                                                                                         |
| A_84_P22051  | -0.76651 | AT2G19450.1 | TAG1 (TRIACYLGLYCEROL BIOSYNTHESIS DEFECT 1); diacylglycerol O-acyltransferase                                                          |
| A_84_P758431 | -0.76502 | AT2G45685.1 | other RNA                                                                                                                               |
| A_84_P759889 | -0.76487 | AT3G44420.2 | transposable element gene                                                                                                               |
| A_84_P17433  | -0.76446 | AT3G20080.1 | CYP705A15 (cytochrome P450, family 705, subfamily A, polypeptide 15); oxygen binding                                                    |
| A_84_P283660 | -0.76278 | AT2G42040.1 | similar to unnamed protein product [Vitis vinifera] (GB:CAO23408.1)                                                                     |
| A_84_P21485  | -0.76272 | AT4G37150.1 | esterase, putative                                                                                                                      |
| A_84_P16515  | -0.7627  | AT1G02770.1 | similar to unknown protein [Arabidopsis thaliana] (TAIR:AT1G19060.1)                                                                    |
| A_84_P800943 | -0.76116 | AT4G15550.1 | IAGLU (INDOLE-3-ACETATE BETA-D-GLUCOSYLTRANSFERASE)                                                                                     |
| A_84_P10992  | -0.76083 | AT4G21990.1 | APR3 (APS REDUCTASE 3)                                                                                                                  |
| A_84_P191954 | -0.76076 | AT1G77270.1 | similar to unknown protein [Arabidopsis thaliana] (TAIR:AT3G07730.1)                                                                    |
| A_84_P596218 | -0.75991 | AT2G25130.1 | armadillo/beta-catenin repeat family protein                                                                                            |
| A_84_P264970 | -0.75958 | AT3G27770.1 | similar to unknown protein [Arabidopsis thaliana] (TAIR:AT5G62960.1)                                                                    |
| A_84_P785047 | -0.75889 | AT2G36780.1 | UDP-glucuronosyl/UDP-glucosyl transferase family protein                                                                                |
| A_84_P15006  | -0.75879 | AT5G53200.1 | TRY (TRIPTYCHON); DNA binding / transcription factor                                                                                    |
| A_84_P825311 | -0.75861 | AT5G23460.1 | unknown protein                                                                                                                         |
| A_84_P603659 | -0.75832 | AT4G21310.1 | similar to unknown protein [Arabidopsis thaliana] (TAIR:AT2G32280.1)                                                                    |
| A_84_P15486  | -0.7583  | AT3G05880.1 | RCI2A (RARE-COLD-INDUCIBLE 2A)                                                                                                          |
| A_84_P65284  | -0.75789 | AT1G07900.1 | LBD1 (LOB DOMAIN-CONTAINING PROTEIN 1)                                                                                                  |
| A_84_P16734  | -0.75784 | AT4G38850.1 | SAUR_AC1 (SMALL AUXIN UP RNA 1 FROM ARABIDOPSIS THALIANA ECOTYPE COLUMBIA)                                                              |
| A_84_P217518 | -0.75775 | AT1G79270.1 | ECT8 (evolutionarily conserved C-terminal region 8)                                                                                     |

|              |          |             |                                                                                                   |
|--------------|----------|-------------|---------------------------------------------------------------------------------------------------|
| A_84_P585407 | -0.75661 | AT1G58520.1 | RXW8                                                                                              |
| A_84_P809606 | -0.75647 | AT2G45180.1 | protease inhibitor/seed storage/lipid transfer protein (LTP) family protein                       |
| A_84_P797499 | -0.75635 | AT5G11430.1 | transcription elongation factor-related                                                           |
| A_84_P271080 | -0.75608 | AT3G56600.1 | inositol or phosphatidylinositol kinase                                                           |
| A_84_P23199  | -0.75484 | AT3G58070.1 | GIS (GLABROUS INFLORESCENCE STEMS); nucleic acid binding / transcription factor/ zinc ion binding |
| A_84_P23435  | -0.75465 | AT5G22290.1 | ANAC089 (Arabidopsis NAC domain containing protein 89); transcription factor                      |
| A_84_P267350 | -0.75373 | AT3G07500.1 | far-red impaired responsive family protein / FAR1 family protein                                  |
| A_84_P754978 | -0.75363 | AT2G41000.1 | heat shock protein binding / ubiquinol-cytochrome-c reductase                                     |
| A_84_P18034  | -0.75299 | AT1G78510.1 | SPS1 (SOLANESYL DIPHOSPHATE SYNTHASE 1)                                                           |
| A_84_P17709  | -0.75282 | AT5G02510.1 | similar to unknown protein [Arabidopsis thaliana] (TAIR:AT5G32440.1)                              |
| A_84_P769584 | -0.75218 | AT5G40316.1 | other RNA                                                                                         |
| A_84_P521515 | -0.75217 | AT1G71140.1 | MATE efflux family protein                                                                        |
| A_84_P17768  | -0.75177 | AT5G24850.1 | CRY3 (CRYPTOCHROME 3); DNA binding / DNA photolyase/ FMN binding                                  |
| A_84_P806618 | -0.7513  | AT2G26080.1 | ATGLDP2 (ARABIDOPSIS THALIANA GLYCINE DECARBOXYLASE P-PROTEIN 2)                                  |
| A_84_P257810 | -0.75086 | AT1G69310.1 | WRKY57 (WRKY DNA-binding protein 57); transcription factor                                        |
| A_84_P23854  | -0.75014 | AT2G31810.1 | acetolactate synthase small subunit, putative                                                     |
| A_84_P538534 | -0.75003 | AT2G47360.1 | similar to unknown protein [Arabidopsis thaliana] (TAIR:AT1G02570.1)47360.1]                      |
| A_84_P13052  | -0.74941 | AT5G28010.1 | Bet v I allergen family protein                                                                   |
| A_84_P304810 | -0.74891 | AT3G23450.1 | similar to unnamed protein product, blastp match of 19% identity and 2.8e-15 P-value to GP        |
| A_84_P803586 | -0.74881 | AT4G34881.1 | unknown protein                                                                                   |
| A_84_P200494 | -0.74873 | AT5G40960.1 | similar to unknown protein [Arabidopsis thaliana] (TAIR:AT3G48660.1)                              |
| A_84_P12117  | -0.7475  | AT1G55960.1 | similar to unknown protein [Arabidopsis thaliana] (TAIR:AT3G13062.2)                              |
| A_84_P846427 | -0.74642 | AT2G29900.1 | presenilin family protein                                                                         |
| A_84_P760622 | -0.74641 | AT3G56275.1 | pseudogene of unknown protein                                                                     |
| A_84_P16766  | -0.74514 | AT5G03640.1 | protein kinase family protein                                                                     |
| A_84_P19318  | -0.74491 | AT3G22060.1 | receptor protein kinase-related                                                                   |
| A_84_P10091  | -0.74485 | AT4G32150.1 | VAMP7C (VESICLE-ASSOCIATED MEMBRANE PROTEIN 7C)                                                   |
| A_84_P12894  | -0.74455 | AT4G24960.1 | ATHVA22D (Arabidopsis thaliana HVA22 homologue D)                                                 |
| A_84_P859545 | -0.74375 | AT2G38210.1 | PDX1L4 (PUTATIVE PDX1-LIKE PROTEIN 4)                                                             |
| A_84_P855524 | -0.7432  | AT4G17790.1 | similar to unknown protein [Arabidopsis thaliana] (TAIR:AT1G71940.1)                              |
| A_84_P155475 | -0.74315 | AT4G35060.1 | heavy-metal-associated domain-containing protein / copper chaperone                               |

|              |          |             |                                                                                              |
|--------------|----------|-------------|----------------------------------------------------------------------------------------------|
| A_84_P532282 | -0.7431  | AT2G37300.1 | (CCH)-related                                                                                |
| A_84_P11618  | -0.74306 | AT1G07730.2 | unknown protein                                                                              |
| A_84_P51800  | -0.74296 | AT3G23210.1 | disease resistance-responsive family protein                                                 |
| A_84_P10055  | -0.74214 | AT4G24240.1 | basic helix-loop-helix (bHLH) family protein                                                 |
| A_84_P510878 | -0.74203 | AT1G75000.1 | WRKY7 (WRKY DNA-binding protein 7); transcription factor                                     |
| A_84_P87679  | -0.7412  | AT1G27360.1 | GNS1/SUR4 membrane family protein                                                            |
| A_84_P819114 | -0.74107 | AT1G70480.1 | squamosa promoter-binding protein-like 11 (SPL11)                                            |
| A_84_P17960  | -0.74102 | AT1G01580.1 | similar to unknown protein [Arabidopsis thaliana] (TAIR:AT1G23560.1)                         |
| A_84_P760097 | -0.74062 | AT3G52910.1 | FRO2 (FERRIC REDUCTION OXIDASE 2); ferric-chelate reductase                                  |
| A_84_P63534  | -0.74028 | AT1G64230.1 | AtGRF4 (GROWTH-REGULATING FACTOR 4)                                                          |
| A_84_P18267  | -0.73966 | AT2G19650.1 | UBC28; ubiquitin-protein ligase                                                              |
| A_84_P826703 | -0.73891 | AT2G23340.1 | DC1 domain-containing protein                                                                |
| A_84_P10466  | -0.73871 | AT1G10460.1 | AP2 domain-containing transcription factor, putative                                         |
|              |          |             | GLP7 (GERMIN-LIKE PROTEIN 7); manganese ion binding / metal ion binding / nutrient reservoir |
| A_84_P157605 | -0.73867 | AT2G31940.1 | oxidoreductase/ transition metal ion binding                                                 |
| A_84_P845713 | -0.73843 | AT1G30820.1 | CTP synthase, putative / UTP--ammonia ligase, putative                                       |
| A_84_P20631  | -0.73824 | AT1G73580.1 | C2 domain-containing protein                                                                 |
| A_84_P87549  | -0.73817 | AT3G17609.1 | HYH (HY5-HOMOLOG); DNA binding / transcription factor                                        |
| A_84_P23477  | -0.73798 | AT5G41410.1 | BEL1 (BELL 1); DNA binding / transcription factor                                            |
| A_84_P13046  | -0.73732 | AT5G26200.1 | mitochondrial substrate carrier family protein                                               |
| A_84_P171983 | -0.73718 | AT1G67860.1 | similar to unknown protein [Arabidopsis thaliana] (TAIR:AT1G67865.1)                         |
| A_84_P229959 | -0.73674 | AT2G32765.1 | SUM5 (SUMO 5)                                                                                |
| A_84_P156915 | -0.73604 | AT5G43790.1 | pentatricopeptide (PPR) repeat-containing protein                                            |
| A_84_P750030 | -0.73596 | AT1G73445.1 | transposable element gene                                                                    |
| A_84_P21761  | -0.73533 | AT1G64500.1 | glutaredoxin family protein                                                                  |
| A_84_P172581 | -0.73508 | AT3G03440.1 | armadillo/beta-catenin repeat family protein                                                 |
| A_84_P548023 | -0.73499 | AT1G31200.1 | ATPP2-A9 (Phloem protein 2-A9); carbohydrate binding                                         |
| A_84_P500346 | -0.73336 | AT2G38905.1 | hydrophobic protein, putative / low temperature and salt responsive protein, putative        |
| A_84_P238673 | -0.73305 | AT5G28640.1 | AN3 (ANGUSITFOLIA3)                                                                          |
| A_84_P19357  | -0.73254 | AT3G44990.1 | XTR8 (xyloglucan:xyloglucosyl transferase 8); hydrolase, acting on glycosyl bonds            |
| A_84_P98456  | -0.73246 | AT1G01030.1 | NGA3 (NGATHA3); transcription factor                                                         |
| A_84_P301340 | -0.7321  | AT1G80120.1 | similar to unknown protein [Arabidopsis thaliana] (TAIR:AT3G15810.1)                         |
| A_84_P787198 | -0.73209 | AT5G42680.1 | similar to unknown protein [Arabidopsis thaliana] (TAIR:AT4G39610.1)                         |
| A_84_P22788  | -0.73145 | AT1G65870.1 | disease resistance-responsive family protein                                                 |

|              |          |             |                                                                                                   |
|--------------|----------|-------------|---------------------------------------------------------------------------------------------------|
| A_84_P582570 | -0.73124 | AT5G51530.1 | ubiquitin carboxyl-terminal hydrolase-related                                                     |
| A_84_P803506 | -0.72994 | AT3G30775.1 | ERD5 (EARLY RESPONSIVE TO DEHYDRATION 5); proline dehydrogenase                                   |
| A_84_P856020 | -0.72928 | AT3G04445.1 | pseudogene, putative polyribonucleotide phosphorylase                                             |
| A_84_P855355 | -0.7283  | AT5G49740.1 | ATFRO7/FRO7 (FERRIC REDUCTION OXIDASE 7); ferric-chelate reductase/ oxidoreductase                |
| A_84_P831596 | -0.72736 | AT4G22760.1 | pentatricopeptide (PPR) repeat-containing protein                                                 |
| A_84_P279540 | -0.72679 | AT4G34630.1 | similar to CM0216.450.nc [Lotus japonicus] (GB:BAF98581.1)                                        |
| A_84_P539392 | -0.72656 | AT2G38465.1 | similar to unnamed protein product [Vitis vinifera] (GB:CAO61577.1)                               |
| A_84_P568614 | -0.72547 | AT2G37720.1 | similar to unknown protein [Arabidopsis thaliana] (TAIR:AT5G64020.1)(InterPro:IPR004253)          |
| A_84_P561605 | -0.72525 | AT3G15115.1 | similar to unknown protein [Arabidopsis thaliana] (TAIR:AT1G53180.1)                              |
| A_84_P512722 | -0.72525 | AT2G25690.1 | senescence-associated protein-related                                                             |
| A_84_P80359  | -0.72504 | AT1G76460.1 | RNA recognition motif (RRM)-containing protein                                                    |
| A_84_P12182  | -0.72503 | AT5G56300.1 | GAMT2; S-adenosylmethionine-dependent methyltransferase/ gibberellin carboxyl-O-methyltransferase |
| A_84_P11713  | -0.72485 | AT3G02980.1 | GCN5-related N-acetyltransferase (GNAT) family protein                                            |
| A_84_P552006 | -0.72437 | AT4G11655.1 | transmembrane protein, putative                                                                   |
| A_84_P24030  | -0.72435 | AT3G21700.1 | GTP binding                                                                                       |
| A_84_P15489  | -0.72426 | AT1G53090.1 | SPA4 (SPA1-RELATED 4); signal transducer                                                          |
| A_84_P15706  | -0.72348 | AT4G19070.1 | cadmium-responsive protein / cadmium induced protein (AS8)                                        |
| A_84_P14429  | -0.72336 | AT2G41340.1 | eukaryotic rpb5 RNA polymerase subunit family protein                                             |
| A_84_P15056  | -0.72203 | AT5G65710.1 | HSL2 (HAESA-LIKE 2); ATP binding / kinase/ protein serine/threonine kinase                        |
| A_84_P754167 | -0.72201 | AT1G46554.1 | other RNA                                                                                         |
| A_84_P849989 | -0.7219  | AT1G21590.1 | protein kinase family protein                                                                     |
| A_84_P11699  | -0.72189 | AT3G06410.1 | nucleic acid binding                                                                              |
| A_84_P536812 | -0.72177 | AT3G14595.1 | similar to unknown protein [Arabidopsis thaliana] (TAIR:AT1G17080.1)                              |
| A_84_P851922 | -0.72108 | AT2G46920.1 | POL (POLTERGEIST); protein serine/threonine phosphatase                                           |
| A_84_P765122 | -0.72103 | AT4G04223.1 | other RNA                                                                                         |
| A_84_P304930 | -0.72073 | AT3G60520.1 | zinc ion binding                                                                                  |
| A_84_P593573 | -0.72064 | AT2G30820.1 | similar to unknown protein [Arabidopsis thaliana] (TAIR:AT1G06660.1)                              |
| A_84_P565849 | -0.72054 | AT1G78995.1 | similar to unnamed protein product [Vitis vinifera] (GB:CAO41778.1)                               |
| A_84_P855116 | -0.71983 | AT2G30620.1 | histone H1.2                                                                                      |
| A_84_P132215 | -0.71934 | AT3G54680.1 | proteophosphoglycan-related                                                                       |
| A_84_P554291 | -0.71913 | AT1G68230.1 | reticulon family protein (RTNLB14)                                                                |
| A_84_P830631 | -0.71658 | AT3G16940.1 | calmodulin-binding protein                                                                        |

|              |          |             |                                                                                              |
|--------------|----------|-------------|----------------------------------------------------------------------------------------------|
| A_84_P751876 | -0.71656 | AT1G11803.1 | pseudogene, auxin responsive protein, blastp match of 74% identity and 1.2e-15 P-value to GP |
| A_84_P10193  | -0.71621 | AT5G18600.1 | glutaredoxin family protein                                                                  |
| A_84_P169283 | -0.71602 | AT5G06570.1 | hydrolase                                                                                    |
| A_84_P821989 | -0.71579 | AT3G01560.1 | proline-rich family protein                                                                  |
| A_84_P17695  | -0.71565 | AT4G16790.1 | hydroxyproline-rich glycoprotein family protein                                              |
| A_84_P10136  | -0.71551 | AT4G36670.1 | mannitol transporter, putative                                                               |
| A_84_P209238 | -0.71489 | AT5G20520.1 | WAV2 (WAVY GROWTH 2)                                                                         |
| A_84_P148728 | -0.71445 | AT1G08980.1 | ATAMI1 (AMIDASE-LIKE PROTEIN 1); amidase                                                     |
| A_84_P92419  | -0.71369 | AT4G09745.1 | transposable element gene                                                                    |
| A_84_P22178  | -0.71328 | AT3G27150.1 | kelch repeat-containing F-box family protein                                                 |
| A_84_P14113  | -0.71256 | AT5G66150.1 | glycosyl hydrolase family 38 protein                                                         |
| A_84_P757744 | -0.71248 | AT2G21187.1 | other RNA                                                                                    |
| A_84_P11486  | -0.71205 | AT1G28580.1 | GDSL-motif lipase, putative                                                                  |
| A_84_P775848 | -0.71108 | AT2G22821.1 | other RNA                                                                                    |
| A_84_P255380 | -0.71038 | AT1G16850.1 | unknown protein                                                                              |
| A_84_P753369 | -0.70961 | AT1G60525.1 | other RNA                                                                                    |
| A_84_P19613  | -0.70953 | AT1G06570.1 | PDS1 (PHYTOENE DESATURATION 1)                                                               |
| A_84_P243235 | -0.70912 | AT1G26600.1 | CLE9 (CLAVATA3/ESR-RELATED 9); receptor binding                                              |
| A_84_P750806 | -0.70895 | AT1G31983.1 | pseudogene, hypothetical protein                                                             |
| A_84_P20656  | -0.7087  | AT5G46050.1 | ATPTR3/PTR3 (PEPTIDE TRANSPORTER PROTEIN 3); transporter                                     |
| A_84_P16494  | -0.7087  | AT3G21870.1 | CYCP2;1 (cyclin p2;1); cyclin-dependent protein kinase                                       |
| A_84_P15787  | -0.70863 | AT4G38650.1 | glycosyl hydrolase family 10 protein                                                         |
| A_84_P23581  | -0.70851 | AT5G15770.1 | ATGNA1 (ARABIDOPSIS THALIANA GLUCOSE-6-PHOSPHATE ACETYLTRANSFERASE 1)                        |
| A_84_P21003  | -0.70795 | AT2G41900.1 | zinc finger (CCCH-type) family protein                                                       |
| A_84_P524838 | -0.70746 | AT5G66740.1 | similar to unknown protein [Arabidopsis thaliana] (TAIR:AT1G75160.1)                         |
| A_84_P279890 | -0.70706 | AT5G22610.1 | F-box family protein                                                                         |
| A_84_P240515 | -0.70698 | AT5G24660.1 | similar to unknown protein [Arabidopsis thaliana] (TAIR:AT5G24655.1)                         |
| A_84_P768748 | -0.70676 | AT5G44562.1 | other RNA                                                                                    |
| A_84_P169223 | -0.70628 | AT3G48310.1 | CYP71A22 (cytochrome P450, family 71, subfamily A, polypeptide 22); oxygen binding           |
| A_84_P829789 | -0.70617 | AT1G74130.1 | rhomboid family protein                                                                      |
| A_84_P22819  | -0.70541 | AT1G35910.1 | trehalose-6-phosphate phosphatase, putative                                                  |
| A_84_P800764 | -0.70509 | AT4G39090.1 | RD19 (RESPONSIVE TO DEHYDRATION 19); cysteine-type peptidase                                 |
| A_84_P753864 | -0.7048  | AT1G67365.1 | other RNA                                                                                    |
| A_84_P153218 | -0.70407 | AT4G21780.1 | similar to unknown [Populus trichocarpa] (GB:ABK93184.1)                                     |

|              |          |             |                                                                                                    |
|--------------|----------|-------------|----------------------------------------------------------------------------------------------------|
| A_84_P178304 | -0.70386 | AT4G15690.1 | glutaredoxin family protein                                                                        |
| A_84_P18793  | -0.7037  | AT5G54080.1 | HGO (HOMOGENTISATE 1,2-DIOXYGENASE); homogentisate<br>1,2-dioxygenase                              |
| A_84_P51830  | -0.70114 | AT2G33360.1 | similar to unknown protein [Arabidopsis thaliana] (TAIR:AT1G04490.1)                               |
| A_84_P20298  | -0.70037 | AT3G43190.1 | SUS4; UDP-glycosyltransferase/ sucrose synthase/ transferase, transferring<br>glycosyl groups      |
| A_84_P16655  | -0.70028 | AT4G19850.1 | ATPP2-A2 (Arabidopsis thaliana phloem protein 2-A2); carbohydrate<br>binding                       |
| A_84_P590913 | -0.70017 | AT2G36980.1 | pentatricopeptide (PPR) repeat-containing protein                                                  |
| A_84_P801414 | -0.6998  | AT3G48460.1 | GDSL-motif lipase/hydrolase family protein                                                         |
| A_84_P550701 | -0.69969 | AT1G49990.1 | Identical to F-box protein At1g49990 [Arabidopsis Thaliana] (GB:Q9LPM2)                            |
| A_84_P22009  | -0.69952 | AT2G45660.1 | AGL20 (AGAMOUS-LIKE 20); transcription factor                                                      |
| A_84_P22872  | -0.69952 | AT1G78940.1 | protein kinase family protein                                                                      |
| A_84_P10432  | -0.6993  | AT1G62180.1 | APR2 (5'ADENYLYLPHOSPHOSULFATE REDUCTASE 2)                                                        |
| A_84_P763170 | -0.69906 | AT4G35170.1 | similar to unknown protein [Arabidopsis thaliana] (TAIR:AT2G41990.1)                               |
| A_84_P523260 | -0.69882 | AT1G63960.1 | contains domain PTHR22814 (PTHR22814); contains domain<br>PTHR22814:SF5 (PTHR22814:SF5)            |
| A_84_P836333 | -0.69867 | AT3G22150.1 | pentatricopeptide (PPR) repeat-containing protein                                                  |
| A_84_P22442  | -0.69838 | AT5G03720.1 | AT-HSFA3 (Arabidopsis thaliana heat shock transcription factor A3)                                 |
| A_84_P55070  | -0.69837 | AT4G13030.1 | similar to unnamed protein product [Vitis vinifera] (GB:CAO18001.1);<br>contains domain SSF52540   |
| A_84_P14677  | -0.69824 | AT3G55800.1 | SBPASE (SEDOHEPTULOSE-BISPHOSPHATASE); phosphoric ester<br>hydrolase/ sedoheptulose-bisphosphatase |
| A_84_P13586  | -0.6981  | AT3G10680.1 | heat shock protein-related                                                                         |
| A_84_P754348 | -0.69804 | AT1G55152.1 | unknown protein                                                                                    |
| A_84_P23059  | -0.69799 | AT3G02850.1 | SKOR (stelar K <sup>+</sup> outward rectifier)                                                     |
| A_84_P113062 | -0.69714 | AT5G22140.1 | pyridine nucleotide-disulphide oxidoreductase family protein                                       |
| A_84_P858394 | -0.69692 | AT1G10660.2 | similar to unknown protein [Arabidopsis thaliana] (TAIR:AT5G62960.1)                               |
| A_84_P14335  | -0.69642 | AT1G75810.1 | similar to unnamed protein product [Vitis vinifera] (GB:CAO60969.1)                                |
| A_84_P117052 | -0.69589 | AT3G25640.1 | similar to unknown protein [Arabidopsis thaliana] (TAIR:AT5G23100.1)                               |
| A_84_P823176 | -0.69579 | AT4G01280.1 | myb family transcription factor                                                                    |
| A_84_P20950  | -0.69571 | AT1G72610.1 | GLP1 (GERMIN-LIKE PROTEIN 1); manganese ion binding / metal ion<br>binding / nutrient reservoir    |
| A_84_P21493  | -0.69558 | AT5G02540.1 | short-chain dehydrogenase/reductase (SDR) family protein                                           |
| A_84_P22208  | -0.69531 | AT3G47750.1 | ATATH3 (ABC2 homolog 3); ATPase, coupled to transmembrane<br>movement of substances                |
| A_84_P21478  | -0.69526 | AT4G16640.1 | matrix metalloproteinase, putative                                                                 |

|              |          |             |                                                                                         |
|--------------|----------|-------------|-----------------------------------------------------------------------------------------|
| A_84_P845921 | -0.69397 | AT3G20100.1 | CYP705A19 (cytochrome P450, family 705, subfamily A, polypeptide 19);<br>oxygen binding |
| A_84_P18159  | -0.69393 | AT1G58370.1 | RXF12; hydrolase, hydrolyzing O-glycosyl compounds                                      |
| A_84_P15595  | -0.69381 | AT3G49970.1 | phototropic-responsive protein, putative                                                |
| A_84_P13311  | -0.69363 | AT1G20840.1 | TMT1 (TONOPLAST MONOSACCHARIDE TRANSPORTER1)                                            |
| A_84_P859116 | -0.69339 | AT3G60130.1 | glycosyl hydrolase family 1 protein / beta-glucosidase, putative (YLS1)                 |
| A_84_P290444 | -0.69324 | AT2G45830.1 | DTA2 (DOWNSTREAM TARGET OF AGL15 2)                                                     |
| A_84_P819560 | -0.69322 | AT4G00780.1 | meprin and TRAF homology domain-containing protein / MATH<br>domain-containing protein  |
| A_84_P19185  | -0.69303 | AT2G21140.1 | ATPRP2 (PROLINE-RICH PROTEIN 2)                                                         |
| A_84_P14584  | -0.69293 | AT3G26280.1 | CYP71B4 (cytochrome P450, family 71, subfamily B, polypeptide 4);<br>oxygen binding     |
| A_84_P765664 | -0.69238 | AT4G37682.1 | similar to glycine-rich protein [Arabidopsis thaliana] (TAIR:AT4G37900.1)               |
| A_84_P16701  | -0.6921  | AT4G30350.1 | heat shock protein-related                                                              |
| A_84_P271970 | -0.69176 | AT5G06280.1 | similar to hypothetical protein [Vitis vinifera] (GB:CAN67410.1)                        |
| A_84_P24135  | -0.6912  | AT3G55710.1 | UDP-glucuronosyl/UDP-glucosyl transferase family protein                                |
| A_84_P11809  | -0.69084 | AT3G48530.1 | KING1 (SNF1-RELATED PROTEIN KINASE REGULATORY SUBUNIT<br>GAMMA 1)                       |
| A_84_P578925 | -0.69026 | AT5G56700.1 | F-box protein-related                                                                   |
| A_84_P200184 | -0.69015 | AT4G09490.1 | RNase H domain-containing protein                                                       |
| A_84_P273780 | -0.68982 | AT1G49470.1 | similar to unknown protein [Arabidopsis thaliana] (TAIR:AT1G55230.1)                    |
| A_84_P11857  | -0.68934 | AT1G05760.1 | RTM1 (RESTRICTED TEV MOVEMENT 1)                                                        |
| A_84_P297484 | -0.68907 | AT1G09483.1 | similar to unknown protein [Arabidopsis thaliana] (TAIR:AT1G09470.1)                    |
| A_84_P788334 | -0.68842 | AT2G26355.1 | other RNA                                                                               |
| A_84_P22876  | -0.68831 | AT1G80170.1 | polygalacturonase, putative / pectinase, putative                                       |
| A_84_P754171 | -0.68787 | AT1G52342.1 | unknown protein                                                                         |
| A_84_P83479  | -0.68773 | AT2G10940.1 | protease inhibitor/seed storage/lipid transfer protein (LTP) family protein             |
| A_84_P106502 | -0.68747 | AT3G08570.1 | phototropic-responsive protein, putative                                                |
| A_84_P836579 | -0.68688 | AT1G63690.1 | protease-associated (PA) domain-containing protein                                      |
| A_84_P22050  | -0.68663 | AT1G07590.1 | pentatricopeptide (PPR) repeat-containing protein                                       |
| A_84_P707913 | -0.68568 | AT2G01918.1 | calcium ion binding                                                                     |
| A_84_P769399 | -0.68517 | AT5G03285.1 | other RNA                                                                               |
| A_84_P19255  | -0.68456 | AT1G01190.1 | CYP78A8 (cytochrome P450, family 78, subfamily A, polypeptide 8);<br>oxygen binding     |
| A_84_P810188 | -0.6845  | AT5G03240.1 | UBQ3 (POLYUBIQUITIN 3); protein binding                                                 |
| A_84_P10533  | -0.68428 | AT1G75380.1 | wound-responsive protein-related                                                        |
| A_84_P836914 | -0.6839  | AT3G21790.1 | UDP-glucuronosyl/UDP-glucosyl transferase family protein                                |

|              |          |             |                                                                                     |
|--------------|----------|-------------|-------------------------------------------------------------------------------------|
| A_84_P518483 | -0.6835  | AT5G16740.1 | amino acid transporter family protein                                               |
| A_84_P591139 | -0.68269 | AT4G04370.1 | pentatricopeptide (PPR) repeat-containing protein                                   |
| A_84_P815367 | -0.68186 | AT5G25265.1 | similar to unknown protein [Arabidopsis thaliana] (TAIR:AT2G25260.1)                |
| A_84_P16802  | -0.68155 | AT5G14470.1 | GHMP kinase-related                                                                 |
| A_84_P20183  | -0.68143 | AT2G29060.1 | scarecrow transcription factor family protein                                       |
| A_84_P577108 | -0.67995 | AT5G45520.1 | similar to unknown protein [Arabidopsis thaliana] (TAIR:AT5G45500.1)                |
| A_84_P801733 | -0.67979 | AT2G16895.1 | pseudogene                                                                          |
| A_84_P867822 | -0.67938 | AT2G25964.1 | unknown protein                                                                     |
| A_84_P16018  | -0.67797 | AT5G17450.1 | heavy-metal-associated domain-containing protein / copper chaperone (CCH)-related   |
| A_84_P790287 | -0.67722 | AT1G61215.1 | BRD4 (BROMODOMAIN 4); DNA binding                                                   |
| A_84_P18648  | -0.67596 | AT4G37320.1 | CYP81D5 (cytochrome P450, family 81, subfamily D, polypeptide 5); oxygen binding    |
| A_84_P16745  | -0.67567 | AT4G15500.1 | UGT84A4; UDP-glycosyltransferase/ sinapate 1-glucosyltransferase/ transferase       |
| A_84_P21366  | -0.67564 | AT4G11330.1 | ATMPK5 (MAP KINASE 5); MAP kinase/ kinase                                           |
| A_84_P297924 | -0.67525 | AT3G06210.1 | binding                                                                             |
| A_84_P784727 | -0.675   | AT5G65970.1 | MLO10 (MILDEW RESISTANCE LOCUS O 10); calmodulin binding                            |
| A_84_P820717 | -0.67435 | AT2G33480.2 | ANAC041 (Arabidopsis NAC domain containing protein 41)                              |
| A_84_P14109  | -0.67378 | AT5G65110.1 | ACX2 (ACYL-COA OXIDASE 2); acyl-CoA oxidase                                         |
| A_84_P211698 | -0.6735  | AT2G36430.1 | similar to unknown protein [Arabidopsis thaliana] (TAIR:AT5G22540.1)                |
| A_84_P88029  | -0.67263 | AT3G17380.1 | meprin and TRAF homology domain-containing protein / MATH domain-containing protein |
| A_84_P86269  | -0.67262 | AT3G21260.1 | GLTP3 (GLYCOLIPID TRANSFER PROTEIN 3); glycolipid binding / glycolipid transporter  |
| A_84_P289644 | -0.67132 | AT1G75190.1 | unknown protein                                                                     |
| A_84_P841901 | -0.67123 | AT5G35490.1 | unknown protein                                                                     |
| A_84_P16960  | -0.67121 | AT5G15850.1 | COL1 (CONSTANS-LIKE 1); transcription factor/ zinc ion binding                      |
| A_84_P848800 | -0.67039 | AT2G35940.1 | BLH1 (embryo sac development arrest 29); DNA binding / transcription factor         |
| A_84_P18792  | -0.67006 | AT5G53870.1 | plastocyanin-like domain-containing protein                                         |
| A_84_P17551  | -0.66921 | AT4G00880.1 | auxin-responsive family protein                                                     |
| A_84_P867244 | -0.6691  | AT5G44550.1 | integral membrane family protein                                                    |
| A_84_P762645 | -0.66829 | AT3G27027.1 | similar to unknown protein [Arabidopsis thaliana] (TAIR:AT5G40980.1)                |
| A_84_P584960 | -0.66826 | AT4G21500.1 | similar to unknown protein [Arabidopsis thaliana] (TAIR:AT4G05018.1)                |
| A_84_P753654 | -0.66771 | AT1G35516.1 | contains InterPro domain Myb transcription factor (InterPro:IPR015495)              |
| A_84_P13746  | -0.66766 | AT3G59350.1 | serine/threonine protein kinase, putative                                           |



|              |          |             |                                                                                                  |
|--------------|----------|-------------|--------------------------------------------------------------------------------------------------|
| A_84_P828041 | -0.66753 | AT5G52190.1 | sugar isomerase (SIS) domain-containing protein                                                  |
| A_84_P18848  | -0.66742 | AT5G14740.1 | CA2 (BETA CARBONIC ANHYDRASE 2); carbonate dehydratase/ zinc ion binding                         |
| A_84_P219578 | -0.66703 | AT3G01660.1 | methyltransferase                                                                                |
| A_84_P12469  | -0.66664 | AT1G02816.1 | similar to unknown protein [Arabidopsis thaliana] (TAIR:AT4G02370.1)                             |
| A_84_P11270  | -0.66587 | AT1G55160.1 | similar to unknown protein [Arabidopsis thaliana] (TAIR:AT2G19530.1)                             |
| A_84_P18649  | -0.66583 | AT5G01220.1 | SQD2 (SULFOQUINOVOSYLDIACYLGLYCEROL 2)                                                           |
| A_84_P12522  | -0.66576 | AT2G28710.1 | zinc finger (C2H2 type) family protein                                                           |
| A_84_P55980  | -0.66555 | AT2G42280.1 | basic helix-loop-helix (bHLH) family protein                                                     |
| A_84_P11157  | -0.66553 | AT1G55810.1 | uracil phosphoribosyltransferase, putative / UMP pyrophosphorylase, putative / UPRTase, putative |
| A_84_P105196 | -0.66544 | AT2G01620.1 | MEE11 (maternal effect embryo arrest 11)                                                         |
| A_84_P525179 | -0.66535 | AT2G34920.1 | EDA18 (embryo sac development arrest 18); protein binding / zinc ion binding                     |
| A_84_P20747  | -0.66507 | AT5G17050.1 | UDP-glucuronosyl/UDP-glucosyl transferase family protein                                         |
| A_84_P277620 | -0.66504 | AT5G54660.1 | heat shock protein-related                                                                       |
| A_84_P21807  | -0.66375 | AT1G22740.1 | RAB7 (Ras-related protein 7); GTP binding                                                        |
| A_84_P823027 | -0.66312 | AT2G16890.1 | UDP-glucuronosyl/UDP-glucosyl transferase family protein                                         |
| A_84_P18055  | -0.66233 | AT1G74740.1 | CPK30 (calcium-dependent protein kinase 30)                                                      |
| A_84_P760391 | -0.66138 | AT3G55650.1 | pyruvate kinase, putative                                                                        |
| A_84_P723748 | -0.66106 | AT1G08165.1 | unknown protein                                                                                  |
| A_84_P81579  | -0.66082 | AT2G28110.1 | FRA8 (FRAGILE FIBER8); transferase                                                               |
| A_84_P134585 | -0.66067 | AT3G18260.1 | reticulon family protein (RTNLB9)                                                                |
| A_84_P23420  | -0.66037 | AT5G13580.1 | ABC transporter family protein                                                                   |
| A_84_P11825  | -0.66021 | AT1G06890.1 | transporter-related                                                                              |
| A_84_P133585 | -0.65943 | AT2G17440.1 | leucine-rich repeat family protein                                                               |
| A_84_P18283  | -0.65917 | AT2G01170.1 | amino acid permease family protein                                                               |
| A_84_P23872  | -0.6588  | AT2G16750.1 | protein kinase family protein                                                                    |
| A_84_P17052  | -0.65878 | AT1G80830.1 | NRAMP1 (NRAMP metal ion transporter 1)                                                           |
| A_84_P757921 | -0.6582  | AT2G34925.1 | CLE42 (CLAVATA3/ESR-RELATED 42)                                                                  |
| A_84_P63574  | -0.65817 | AT2G22960.1 | serine carboxypeptidase S10 family protein                                                       |
| A_84_P14847  | -0.65808 | AT4G40060.1 | ATHB-16/ATHB16 (ARABIDOPSIS THALIANA HOMEBOX PROTEIN 16)                                         |
| A_84_P16910  | -0.65793 | AT5G56720.1 | malate dehydrogenase, cytosolic, putative                                                        |
| A_84_P254310 | -0.65688 | AT4G00270.1 | DNA-binding storekeeper protein-related                                                          |
| A_84_P16752  | -0.65678 | AT4G17730.1 | SYP23 (syntaxin 23); SNAP receptor                                                               |
| A_84_P240045 | -0.65462 | AT5G22270.1 | similar to unknown protein [Arabidopsis thaliana] (TAIR:AT5G06270.1)                             |

|              |          |             |                                                                                               |
|--------------|----------|-------------|-----------------------------------------------------------------------------------------------|
| A_84_P200454 | -0.65434 | AT2G01660.1 | 33 kDa secretory protein-related                                                              |
| A_84_P21681  | -0.65402 | AT5G66460.1 | (1-4)-beta-mannan endohydrolase, putative                                                     |
| A_84_P784921 | -0.6538  | AT1G16490.1 | AtMYB58 (myb domain protein 58); DNA binding / transcription factor                           |
| A_84_P20858  | -0.65325 | AT1G60360.1 | zinc finger (C3HC4-type RING finger) family protein                                           |
| A_84_P10470  | -0.65237 | AT1G03120.1 | ATRAB28 (Arabidopsis thaliana responsive to abscisic acid 28)                                 |
| A_84_P13891  | -0.65216 | AT4G37520.1 | peroxidase 50 (PER50) (P50) (PRXR2)                                                           |
| A_84_P13306  | -0.65197 | AT1G03090.1 | MCCA (3-methylcrotonyl-CoA carboxylase 1)                                                     |
| A_84_P520864 | -0.65137 | AT3G23370.1 | nucleic acid binding                                                                          |
| A_84_P855653 | -0.6505  | AT3G29770.1 | hydrolase, alpha/beta fold family protein                                                     |
| A_84_P272980 | -0.65047 | AT5G18080.1 | auxin-responsive protein, putative                                                            |
| A_84_P765637 | -0.65026 | AT4G31248.1 | other RNA                                                                                     |
| A_84_P597022 | -0.6473  | AT1G71110.1 | similar to unknown protein [Arabidopsis thaliana] (TAIR:AT2G12400.1)                          |
| A_84_P13293  | -0.64681 | AT1G60430.1 | ARPC3 (actin-related protein C3); structural molecule                                         |
| A_84_P22232  | -0.64659 | AT1G06760.1 | histone H1, putative                                                                          |
| A_84_P808228 | -0.64647 | AT3G20470.1 | encodes a glycine-rich protein                                                                |
| A_84_P13502  | -0.64622 | AT2G27820.1 | PD1 (PREPHENATE DEHYDRATASE 1); arogenate dehydratase/<br>prephenate dehydratase              |
| A_84_P13513  | -0.64616 | AT2G19400.1 | protein kinase, putative                                                                      |
| A_84_P275810 | -0.64581 | AT4G16610.1 | zinc finger (C2H2 type) family protein                                                        |
| A_84_P14989  | -0.64576 | AT5G48150.1 | PAT1 (PHYTOCHROME A SIGNAL TRANSDUCTION 1); transcription<br>factor                           |
| A_84_P761701 | -0.64536 | AT3G23255.1 | similar to unnamed protein product [Vitis vinifera] (GB:CAO68683.1)                           |
| A_84_P544465 | -0.64473 | AT1G26945.1 | transcription regulator                                                                       |
| A_84_P12248  | -0.64464 | AT5G19490.1 | DNA binding / sequence-specific DNA binding                                                   |
| A_84_P21480  | -0.64383 | AT4G17090.1 | CT-BMY (BETA-AMYLASE 3, BETA-AMYLASE 8); beta-amylase                                         |
| A_84_P15068  | -0.64294 | AT5G15830.1 | ATBZIP3 (ARABIDOPSIS THALIANA BASIC LEUCINE-ZIPPER 3);<br>DNA binding / transcription factor  |
| A_84_P824443 | -0.64245 | AT2G26210.1 | ankyrin repeat family protein                                                                 |
| A_84_P765024 | -0.64201 | AT4G38545.2 | other RNA                                                                                     |
| A_84_P752604 | -0.6419  | AT1G09500.2 | cinnamyl-alcohol dehydrogenase family / CAD family                                            |
| A_84_P300200 | -0.64181 | AT3G52950.1 | CBS domain-containing protein / octicosapeptide/Phox/Bemp1 (PB1)<br>domain-containing protein |
| A_84_P59870  | -0.64142 | AT5G33390.1 | glycine-rich protein                                                                          |
| A_84_P14520  | -0.64138 | AT3G01500.1 | CA1 (CARBONIC ANHYDRASE 1); carbonate dehydratase/ zinc ion<br>binding                        |
| A_84_P18064  | -0.64094 | AT1G15580.1 | IAA5 (indoleacetic acid-induced protein 5); transcription factor                              |
| A_84_P850865 | -0.64041 | AT4G27940.1 | mitochondrial substrate carrier family protein                                                |

|              |          |             |                                                                                                   |
|--------------|----------|-------------|---------------------------------------------------------------------------------------------------|
| A_84_P545008 | -0.6398  | AT4G31875.1 | unknown protein                                                                                   |
| A_84_P11812  | -0.63942 | AT3G49210.1 | similar to unknown protein [Arabidopsis thaliana] (TAIR:AT3G49200.1)                              |
| A_84_P20206  | -0.63935 | AT3G10630.1 | glycosyl transferase family 1 protein                                                             |
| A_84_P19911  | -0.63884 | AT1G09170.1 | kinesin motor protein-related                                                                     |
| A_84_P117762 | -0.63879 | AT3G03520.1 | phosphoesterase family protein                                                                    |
| A_84_P753502 | -0.63867 | AT1G60545.1 | other RNA                                                                                         |
| A_84_P569013 | -0.63839 | AT5G18475.1 | pentatricopeptide (PPR) repeat-containing protein                                                 |
| A_84_P542240 | -0.63759 | AT4G01525.1 | transposable element gene                                                                         |
| A_84_P19594  | -0.63704 | AT4G37330.1 | CYP81D4 (cytochrome P450, family 81, subfamily D, polypeptide 4);<br>oxygen binding               |
| A_84_P64584  | -0.63673 | AT5G67140.1 | F-box family protein                                                                              |
| A_84_P612559 | -0.63665 | AT4G26095.1 | other RNA                                                                                         |
| A_84_P13539  | -0.63616 | AT1G07570.1 | APK1A (Arabidopsis protein kinase 1A); kinase                                                     |
| A_84_P813996 | -0.63603 | AT5G02160.1 | unknown protein                                                                                   |
| A_84_P220938 | -0.63592 | AT1G02470.1 | similar to unknown protein [Arabidopsis thaliana] (TAIR:AT1G02475.1)                              |
| A_84_P591780 | -0.63569 | AT2G26695.1 | binding                                                                                           |
| A_84_P853880 | -0.6355  | AT5G10860.1 | CBS domain-containing protein                                                                     |
| A_84_P725389 | -0.63404 | AT2G04110.1 | pseudogene of unknown protein                                                                     |
| A_84_P22549  | -0.63289 | AT5G46350.1 | WRKY8 (WRKY DNA-binding protein 8); transcription factor                                          |
| A_84_P584290 | -0.63284 | AT5G56050.1 | similar to unknown protein [Arabidopsis thaliana] (TAIR:AT4G26490.1)                              |
| A_84_P19244  | -0.63276 | AT3G05160.1 | sugar transporter, putative                                                                       |
| A_84_P802590 | -0.63275 | AT5G24460.1 | hydrolase                                                                                         |
| A_84_P12653  | -0.63212 | AT3G08660.1 | phototropic-responsive protein, putative                                                          |
| A_84_P786032 | -0.63194 | AT4G26850.1 | VTC2 (VITAMIN C DEFECTIVE 2)                                                                      |
| A_84_P19410  | -0.63153 | AT3G56630.1 | CYP94D2 (cytochrome P450, family 94, subfamily D, polypeptide 2);<br>oxygen binding               |
| A_84_P240555 | -0.63037 | AT3G15095.1 | similar to unnamed protein product [Vitis vinifera] (GB:CAO39345.1)                               |
| A_84_P14878  | -0.63031 | AT5G04950.1 | nicotianamine synthase, putative                                                                  |
| A_84_P584214 | -0.62993 | AT5G26720.1 | unknown protein                                                                                   |
| A_84_P222339 | -0.62967 | AT3G27940.1 | LBD26 (LOB DOMAIN-CONTAINING PROTEIN 26)                                                          |
| A_84_P17716  | -0.62966 | AT5G04980.1 | endonuclease/exonuclease/phosphatase family protein                                               |
| A_84_P797576 | -0.62908 | AT5G14760.1 | AO (L-ASPARTATE OXIDASE); L-aspartate oxidase                                                     |
| A_84_P15074  | -0.62804 | AT5G20970.1 | heat shock family protein                                                                         |
| A_84_P840800 | -0.6278  | AT1G48500.1 | JAZ4/TIFY6A (JASMONATE-ZIM-DOMAIN PROTEIN 4)                                                      |
| A_84_P591086 | -0.6272  | AT3G52550.1 | similar to ATOFP18/OFP18 (Arabidopsis thaliana ovate family protein 18)<br>[Arabidopsis thaliana] |
| A_84_P23992  | -0.62678 | AT3G05640.1 | protein phosphatase 2C, putative / PP2C, putative                                                 |

|              |          |             |                                                                                           |
|--------------|----------|-------------|-------------------------------------------------------------------------------------------|
| A_84_P220058 | -0.62616 | AT3G12920.1 | protein binding / zinc ion binding                                                        |
| A_84_P90349  | -0.62592 | AT5G53030.1 | similar to unknown protein [Arabidopsis thaliana] (TAIR:AT4G27810.1)                      |
| A_84_P836848 | -0.62392 | AT3G12350.1 | F-box family protein                                                                      |
| A_84_P169313 | -0.62275 | AT2G36590.1 | ProT3 (PROLINE TRANSPORTER 3); amino acid transmembrane transporter                       |
| A_84_P123262 | -0.62272 | AT1G61740.1 | similar to unknown protein [Arabidopsis thaliana] (TAIR:AT1G11540.1)                      |
| A_84_P505592 | -0.6226  | AT2G04795.1 | similar to unknown protein [Arabidopsis thaliana] (TAIR:AT5G35732.1)                      |
| A_84_P159155 | -0.62194 | AT2G18240.1 | RER1 protein, putative                                                                    |
| A_84_P757373 | -0.62162 | AT2G33233.1 | LCR49 (Low-molecular-weight cysteine-rich 49)                                             |
| A_84_P19361  | -0.62152 | AT3G45860.1 | receptor-like protein kinase, putative                                                    |
| A_84_P21401  | -0.62134 | AT4G23930.1 | similar to proline-rich family protein [Arabidopsis thaliana] (TAIR:AT1G64450.1)          |
| A_84_P19604  | -0.62109 | AT5G03680.1 | PTL (PETAL LOSS); transcription factor                                                    |
| A_84_P18829  | -0.62062 | AT5G62920.1 | ARR6 (RESPONSE REGULATOR 6); transcription regulator/<br>two-component response regulator |
| A_84_P753413 | -0.62058 | AT1G07728.2 | other RNA                                                                                 |
| A_84_P570004 | -0.61997 | AT5G53590.1 | auxin-responsive family protein                                                           |
| A_84_P606494 | -0.61989 | AT5G38770.1 | ATGDU7 (ARABIDOPSIS THALIANA GLUTAMINE DUMPER 7)                                          |
| A_84_P11303  | -0.61907 | AT5G20830.1 | SUS1 (SUCROSE SYNTHASE 1); UDP-glycosyltransferase/ sucrose synthase                      |
| A_84_P16048  | -0.61905 | AT2G20875.1 | EPF1 (EPIDERMAL PATTERNING FACTOR 1)                                                      |
| A_84_P11946  | -0.61862 | AT4G24260.1 | ATGH9A3/KOR3 (ARABIDOPSIS THALIANA GLYCOSYL HYDROLASE 9A3)                                |
| A_84_P766856 | -0.61743 | AT5G56747.1 | transposable element gene                                                                 |
| A_84_P67974  | -0.6164  | AT3G52525.1 | ATOFP6/OFPP6 (Arabidopsis thaliana ovate family protein 6)                                |
| A_84_P13850  | -0.61622 | AT4G27260.1 | GH3.5/WES1; indole-3-acetic acid amido synthetase                                         |
| A_84_P277980 | -0.61557 | AT3G08840.1 | D-alanine--D-alanine ligase family                                                        |
| A_84_P765231 | -0.61511 | AT4G20320.2 | similar to CTP synthase, putative / UTP--ammonia ligase, putative [Arabidopsis thaliana]  |
| A_84_P229099 | -0.61471 | AT5G06660.1 | similar to unknown protein [Arabidopsis thaliana] (TAIR:AT3G12030.1)                      |
| A_84_P827163 | -0.61403 | AT1G55910.1 | ZIP11 (ZINC TRANSPORTER 11 PRECURSOR)                                                     |
| A_84_P542432 | -0.61349 | AT5G20810.1 | auxin-responsive protein, putative / small auxin up RNA (SAUR_B)                          |
| A_84_P239815 | -0.61311 | AT1G12020.1 | similar to unknown protein [Arabidopsis thaliana] (TAIR:AT1G62422.1)                      |
| A_84_P769220 | -0.6128  | AT5G18404.1 | unknown protein                                                                           |
| A_84_P20610  | -0.61237 | AT5G25880.1 | ATNADP-ME3 (NADP-MALIC ENZYME 3)                                                          |
| A_84_P865032 | -0.61236 | AT1G28960.4 | ATNUDT15 (ARABIDOPSIS THALIANA NUDIX HYDROLASE HOMOLOG 15); hydrolase                     |

|              |          |             |                                                                                           |
|--------------|----------|-------------|-------------------------------------------------------------------------------------------|
| A_84_P793283 | -0.61148 | AT5G66920.1 | SKS17 (SKU5 Similar 17); copper ion binding / oxidoreductase                              |
| A_84_P219918 | -0.61045 | AT1G01830.1 | armadillo/beta-catenin repeat family protein                                              |
| A_84_P13789  | -0.61031 | AT4G08670.1 | protease inhibitor/seed storage/lipid transfer protein (LTP) family protein               |
| A_84_P14599  | -0.6101  | AT3G19280.1 | FUT11 (Fucosyltransferase 11)                                                             |
| A_84_P609485 | -0.60816 | AT1G79520.1 | cation efflux family protein                                                              |
| A_84_P16334  | -0.60812 | AT2G29290.1 | tropinone reductase, putative / tropine dehydrogenase, putative                           |
| A_84_P825340 | -0.60772 | AT3G03210.1 | similar to unnamed protein product [Vitis vinifera] (GB:CAO22195.1)                       |
| A_84_P258220 | -0.60746 | AT1G19660.1 | wound-responsive family protein                                                           |
| A_84_P829467 | -0.60709 | AT2G15830.1 | similar to unknown protein [Arabidopsis thaliana] (TAIR:AT4G33960.1)                      |
| A_84_P204648 | -0.60642 | AT3G04310.1 | similar to unknown protein [Arabidopsis thaliana] (TAIR:AT2G33250.1)                      |
| A_84_P274090 | -0.60581 | AT1G68430.1 | unknown protein                                                                           |
| A_84_P152798 | -0.60581 | AT5G18030.1 | auxin-responsive protein, putative                                                        |
| A_84_P74134  | -0.60547 | AT3G19290.1 | ABF4 (ABRE BINDING FACTOR 4); DNA binding / transcription activator/ transcription factor |
| A_84_P82199  | -0.60507 | AT2G44850.1 | similar to unknown protein [Arabidopsis thaliana] (TAIR:AT2G45380.1)                      |
| A_84_P17852  | -0.60499 | AT1G33090.1 | MATE efflux family protein                                                                |
| A_84_P533595 | -0.60469 | AT5G23380.1 | similar to unknown protein [Arabidopsis thaliana] (TAIR:AT1G03610.1)                      |
| A_84_P179124 | -0.60469 | AT5G05830.1 | zinc finger (C3HC4-type RING finger) family protein                                       |
| A_84_P12812  | -0.60459 | AT3G62060.1 | pectinacetyltransferase family protein                                                    |
| A_84_P21371  | -0.60383 | AT4G12530.1 | protease inhibitor/seed storage/lipid transfer protein (LTP) family protein               |
| A_84_P20791  | -0.60362 | AT3G16555.1 | F-box family protein                                                                      |
| A_84_P766867 | -0.6033  | AT5G63470.1 | CCAAT-box binding transcription factor Hap5a, putative                                    |
| A_84_P525626 | -0.60249 | AT5G42610.1 | similar to unknown protein [Arabidopsis thaliana] (TAIR:AT2G23790.1)                      |
| A_84_P21192  | -0.6022  | AT3G19930.1 | STP4 (SUGAR TRANSPORTER 4)                                                                |
| A_84_P815660 | -0.60219 | AT2G22660.2 | similar to glycine-rich protein [Arabidopsis thaliana] (TAIR:AT4G37900.1)                 |
| A_84_P16506  | -0.6019  | AT3G14770.1 | nodulin MtN3 family protein                                                               |
| A_84_P11271  | -0.60066 | AT5G64280.1 | DIT2.2 (DICARBOXYLATE TRANSPORTER 2.2); oxoglutarate:malate antiporter                    |
| A_84_P13109  | -0.59985 | AT5G51050.1 | mitochondrial substrate carrier family protein                                            |
| A_84_P600173 | -0.59815 | AT5G03490.1 | UDP-glucuronosyl/UDP-glucosyl transferase family protein                                  |
| A_84_P10959  | -0.59794 | AT4G09950.1 | avirulence-responsive family protein / avirulence induced gene (AIG1) family protein      |
| A_84_P294484 | -0.59702 | AT1G68680.1 | similar to unknown [Populus trichocarpa] (GB:ABK93653.1)                                  |
| A_84_P81259  | -0.59659 | AT4G21510.1 | F-box family protein                                                                      |
| A_84_P19171  | -0.59476 | AT2G45630.1 | oxidoreductase family protein                                                             |
| A_84_P12404  | -0.59333 | AT1G55610.1 | BRL1 (BRI 1 LIKE); kinase                                                                 |
| A_84_P23660  | -0.59306 | AT1G60800.1 | NIK3 (NSP-INTERACTING KINASE 3); kinase                                                   |

|              |          |             |                                                                                            |
|--------------|----------|-------------|--------------------------------------------------------------------------------------------|
| A_84_P10659  | -0.59286 | AT2G46680.1 | ATHB-7 (ARABIDOPSIS THALIANA HOMEODOMAIN 7); transcription factor                          |
| A_84_P602056 | -0.59285 | AT5G43185.1 | Expressed protein                                                                          |
| A_84_P765116 | -0.59168 | AT4G12917.1 | other RNA                                                                                  |
| A_84_P19781  | -0.59094 | AT5G64410.1 | ATOPT4 (oligopeptide transporter 4); oligopeptide transporter                              |
| A_84_P790028 | -0.59084 | AT3G03360.1 | F-box family protein                                                                       |
| A_84_P17132  | -0.59075 | AT1G71990.1 | FUT13 (fucosyltransferase 13)                                                              |
| A_84_P768303 | -0.59029 | AT5G18407.1 | Encodes a defensin-like (DEFL) family protein.                                             |
| A_84_P757492 | -0.58978 | AT2G17150.2 | RWP-RK domain-containing protein                                                           |
| A_84_P15454  | -0.58945 | AT2G29130.1 | LAC2 (laccase 2); copper ion binding / oxidoreductase                                      |
| A_84_P16187  | -0.58922 | AT1G36380.1 | electron carrier/ ubiquinol-cytochrome-c reductase                                         |
| A_84_P582591 | -0.58912 | AT1G08840.1 | EMB2411 (EMBRYO DEFECTIVE 2411); ATP-dependent DNA helicase                                |
| A_84_P24036  | -0.58784 | AT3G27070.1 | TOM20-1 (TRANSLOCASE OUTER MEMBRANE 20-1)                                                  |
| A_84_P11640  | -0.58545 | AT2G37650.1 | scarecrow-like transcription factor 9 (SCL9)                                               |
| A_84_P188144 | -0.58534 | AT4G02940.1 | oxidoreductase, 2OG-Fe(II) oxygenase family protein                                        |
| A_84_P769660 | 0.585732 | AT5G48240.2 | similar to unnamed protein product [Vitis vinifera] (GB:CAO41129.1)                        |
| A_84_P828660 | 0.586294 | AT2G20100.1 | ethylene-responsive family protein                                                         |
| A_84_P15719  | 0.5869   | AT4G22360.1 | SWIB complex BAF60b domain-containing protein                                              |
| A_84_P815994 | 0.587082 | AT1G54020.2 | myosinase-associated protein, putative                                                     |
| A_84_P15078  | 0.58756  | AT5G19300.1 | similar to unnamed protein product [Vitis vinifera] (GB:CAO71126.1)                        |
| A_84_P102376 | 0.588882 | AT5G08000.1 | E13L3 (GLUCAN ENDO-1,3-BETA-GLUCOSIDASE-LIKE PROTEIN 3)                                    |
| A_84_P739523 | 0.590005 | AT2G31150.1 | ATP binding / ATPase, coupled to transmembrane movement of ions, phosphorylative mechanism |
| A_84_P538274 | 0.591055 | AT1G30755.1 | similar to unknown protein [Arabidopsis thaliana] (TAIR:AT1G34320.1)                       |
| A_84_P15773  | 0.591177 | AT1G14980.1 | CPN10 (CHAPERONIN 10)                                                                      |
| A_84_P12218  | 0.591487 | AT5G64870.1 | similar to unknown protein [Arabidopsis thaliana] (TAIR:AT5G25250.1)                       |
| A_84_P12373  | 0.591815 | AT1G14240.1 | nucleoside phosphatase family protein / GDA1/CD39 family protein                           |
| A_84_P227239 | 0.592026 | AT5G13210.1 | similar to unknown protein [Arabidopsis thaliana] (TAIR:AT3G24780.1)                       |
| A_84_P19337  | 0.59257  | AT3G20960.1 | CYP705A33 (cytochrome P450, family 705, subfamily A, polypeptide 33); oxygen binding       |
| A_84_P787999 | 0.593605 | AT3G29370.1 | similar to unknown protein [Arabidopsis thaliana] (TAIR:AT5G39240.1)                       |
| A_84_P209078 | 0.594786 | AT5G11170.1 | DEAD/DEAH box helicase, putative (RH15)                                                    |
| A_84_P21437  | 0.59483  | AT4G31805.1 | WRKY family transcription factor                                                           |
| A_84_P858493 | 0.595226 | AT5G45775.1 | 60S ribosomal protein L11 (RPL11D)                                                         |
| A_84_P785785 | 0.595335 | AT2G31610.1 | 40S ribosomal protein S3 (RPS3A)                                                           |
| A_84_P13728  | 0.595468 | AT3G55010.1 | ATPURM/PUR5; phosphoribosylformylglycinamide cyclo-ligase                                  |
| A_84_P831117 | 0.595895 | AT5G12220.1 | las1-like family protein                                                                   |

|              |          |             |                                                                          |
|--------------|----------|-------------|--------------------------------------------------------------------------|
| A_84_P583961 | 0.595913 | AT3G51340.1 | pepsin A                                                                 |
| A_84_P18200  | 0.595943 | AT2G20450.1 | 60S ribosomal protein L14 (RPL14A)                                       |
| A_84_P12221  | 0.596394 | AT5G65630.1 | GTE7 (GLOBAL TRANSCRIPTION FACTOR GROUP E 7); DNA binding                |
| A_84_P140769 | 0.597038 | AT5G08335.1 | ATSTE14B (PRENYLCYSTEINE ALPHA-CARBOXYL METHYLTRANSFERASE)               |
| A_84_P547813 | 0.597492 | AT5G43990.1 | SUVR2; histone-lysine N-methyltransferase/ zinc ion binding              |
| A_84_P76084  | 0.598492 | AT3G25430.1 | CAF1 family ribonuclease                                                 |
| A_84_P18701  | 0.59931  | AT5G18310.1 | similar to unknown protein [Arabidopsis thaliana] (TAIR:AT5G48500.1)     |
| A_84_P225239 | 0.599638 | AT3G13960.1 | AtGRF5 (GROWTH-REGULATING FACTOR 5)                                      |
| A_84_P610565 | 0.599725 | AT3G11402.1 | DC1 domain-containing protein                                            |
| A_84_P18550  | 0.600545 | AT4G20780.1 | calcium-binding protein, putative                                        |
| A_84_P19975  | 0.600651 | AT1G77510.1 | ATPDIL1-2 (PDI-LIKE 1-2); protein disulfide isomerase                    |
| A_84_P11009  | 0.601475 | AT4G25950.1 | VATG3 (VACUOLAR ATP SYNTHASE G3)                                         |
| A_84_P23363  | 0.601839 | AT4G14550.1 | IAA14 (SOLITARY ROOT); transcription factor                              |
| A_84_P19086  | 0.604219 | AT1G61570.1 | TIM13; P-P-bond-hydrolysis-driven protein transmembrane transporter      |
| A_84_P178904 | 0.604955 | AT2G28305.1 | similar to unknown protein [Arabidopsis thaliana] (TAIR:AT2G37210.1)     |
| A_84_P22396  | 0.605047 | AT1G15000.1 | SCPL50 (serine carboxypeptidase-like 50); serine carboxypeptidase        |
| A_84_P300850 | 0.60637  | AT5G46510.1 | disease resistance protein (TIR-NBS-LRR class), putative                 |
| A_84_P15946  | 0.607208 | AT5G51440.1 | 23.5 kDa mitochondrial small heat shock protein (HSP23.5-M)              |
| A_84_P12969  | 0.607725 | AT4G17230.1 | SCL13 (SCARECROW-LIKE 13); transcription factor                          |
| A_84_P16004  | 0.607809 | AT5G66170.1 | similar to unknown protein [Arabidopsis thaliana] (TAIR:AT2G17850.1)     |
| A_84_P10647  | 0.608858 | AT2G26480.1 | UDP-glucuronosyl/UDP-glucosyl transferase family protein                 |
| A_84_P823851 | 0.609331 | AT3G60260.4 | phagocytosis and cell motility protein ELMO1-related                     |
| A_84_P85169  | 0.609397 | AT3G26600.1 | armadillo/beta-catenin repeat family protein                             |
| A_84_P17519  | 0.610471 | AT3G57040.1 | ARR9 (RESPONSE REACTOR 4); transcription regulator                       |
| A_84_P14286  | 0.611167 | AT1G78260.1 | RNA recognition motif (RRM)-containing protein                           |
| A_84_P12670  | 0.611459 | AT3G26810.1 | AFB2 (AUXIN SIGNALING F-BOX 2); auxin binding / ubiquitin-protein ligase |
| A_84_P246285 | 0.61147  | AT3G03920.1 | Gar1 RNA-binding region family protein                                   |
| A_84_P10498  | 0.611617 | AT1G16060.1 | ovule development protein, putative                                      |
| A_84_P19239  | 0.611858 | AT1G44830.1 | AP2 domain-containing transcription factor TINY, putative                |
| A_84_P19115  | 0.612182 | AT2G43590.1 | chitinase, putative                                                      |
| A_84_P11980  | 0.612726 | AT4G31700.1 | RPS6 (RIBOSOMAL PROTEIN S6); structural constituent of ribosome          |
| A_84_P14290  | 0.61281  | AT1G72440.1 | EDA25 (embryo sac development arrest 25); binding                        |
| A_84_P13961  | 0.613472 | AT5G13320.1 | PBS3 (AVRPPHB SUSCEPTIBLE 3)                                             |
| A_84_P19489  | 0.613973 | AT1G29320.1 | transducin family protein / WD-40 repeat family protein                  |

|              |          |             |                                                                                 |
|--------------|----------|-------------|---------------------------------------------------------------------------------|
| A_84_P522915 | 0.614924 | AT5G16560.1 | KAN (KANADI); transcription factor                                              |
| A_84_P754506 | 0.615261 | AT1G53542.1 | unknown protein                                                                 |
| A_84_P11526  | 0.616113 | AT1G43170.1 | ARP1 (ARABIDOPSIS RIBOSOMAL PROTEIN 1); structural constituent of ribosome      |
| A_84_P52410  | 0.616514 | AT4G37080.1 | similar to unknown protein [Arabidopsis thaliana] (TAIR:AT5G42690.2)            |
| A_84_P180484 | 0.616748 | AT2G33570.1 | similar to unknown protein [Arabidopsis thaliana] (TAIR:AT5G44670.1)            |
| A_84_P213368 | 0.617518 | AT4G15770.1 | 60S ribosome subunit biogenesis protein, putative                               |
| A_84_P18471  | 0.618461 | AT3G58660.1 | 60S ribosomal protein-related                                                   |
| A_84_P162403 | 0.618725 | AT3G59760.2 | OASC (O-ACETYL SERINE (THIOL) LYASE ISOFORM C); cysteine synthase               |
| A_84_P559716 | 0.619615 | AT2G28140.1 | similar to unknown protein [Arabidopsis thaliana] (TAIR:AT3G44940.1)            |
| A_84_P859177 | 0.619654 | AT4G22780.1 | ACR7 (ACT Domain Repeat 7)                                                      |
| A_84_P16203  | 0.619676 | AT1G48630.1 | guanine nucleotide-binding family protein / activated protein kinase C receptor |
| A_84_P18090  | 0.619938 | AT1G08410.1 | GTP-binding family protein                                                      |
| A_84_P198054 | 0.620314 | AT4G32920.1 | glycine-rich protein                                                            |
| A_84_P764257 | 0.620644 | AT4G33110.1 | cochlorine N-methyltransferase, putative                                        |
| A_84_P10491  | 0.620973 | AT1G53920.1 | GLIP5 (GDSL-motif lipase 5); carboxylesterase                                   |
| A_84_P16034  | 0.621076 | AT5G28290.1 | ATNEK3; kinase                                                                  |
| A_84_P785514 | 0.622267 | AT1G23290.1 | RPL27A (RIBOSOMAL PROTEIN L27A); structural constituent of ribosome             |
| A_84_P268810 | 0.623396 | AT4G27560.1 | glycosyltransferase family protein                                              |
| A_84_P22015  | 0.624223 | AT1G30040.1 | ATGA2OX2; gibberellin 2-beta-dioxygenase                                        |
| A_84_P514604 | 0.624294 | AT3G07530.1 | similar to unnamed protein product [Vitis vinifera] (GB:CAO67613.1)             |
| A_84_P22552  | 0.625205 | AT5G47130.1 | Bax inhibitor-1 family / BI-1 family                                            |
| A_84_P284960 | 0.625281 | AT2G20490.1 | EDA27/NOP10 (embryo sac development arrest 27); RNA binding                     |
| A_84_P227839 | 0.626138 | AT1G67050.1 | similar to unknown protein [Arabidopsis thaliana] (TAIR:AT5G38320.1)            |
| A_84_P812170 | 0.626846 | AT3G45140.1 | LOX2 (LIPOXYGENASE 2)                                                           |
| A_84_P11385  | 0.627476 | AT1G09070.1 | (AT)SRC2/SRC2 (SOYBEAN GENE REGULATED BY COLD-2); protein binding               |
| A_84_P279440 | 0.628135 | AT1G57680.1 | similar to unnamed protein product [Vitis vinifera] (GB:CAO46875.1)             |
| A_84_P13376  | 0.629476 | AT1G74430.1 | MYB95 (myb domain protein 95); DNA binding / transcription factor               |
| A_84_P108542 | 0.629512 | AT2G41180.1 | sigA-binding protein-related                                                    |
| A_84_P19640  | 0.631147 | AT5G14520.1 | pescafillo-related                                                              |
| A_84_P55510  | 0.631561 | AT2G39870.1 | similar to unknown protein [Arabidopsis thaliana] (TAIR:AT3G55690.1)            |
| A_84_P785492 | 0.631868 | AT5G20230.1 | ATBCB (ARABIDOPSIS BLUE-COPPER-BINDING PROTEIN); copper ion binding             |



|              |          |             |                                                                                                    |
|--------------|----------|-------------|----------------------------------------------------------------------------------------------------|
| A_84_P296254 | 0.632245 | AT3G10280.1 | fatty acid elongase 3-ketoacyl-CoA synthase, putative                                              |
| A_84_P305680 | 0.632445 | AT4G20390.1 | integral membrane family protein                                                                   |
| A_84_P830058 | 0.632723 | AT1G63860.1 | pseudogene, disease resistance protein, similar to disease resistance protein RPP1-WsC             |
| A_84_P20289  | 0.633074 | AT3G28270.1 | Identical to UPF0496 protein At3g28270 [Arabidopsis Thaliana]                                      |
| A_84_P608554 | 0.634587 | AT1G67460.1 | GTP binding / GTPase                                                                               |
| A_84_P786186 | 0.635714 | AT1G14580.1 | zinc finger (C2H2 type) family protein                                                             |
| A_84_P18411  | 0.637125 | AT3G44970.1 | cytochrome P450 family protein                                                                     |
| A_84_P11194  | 0.637343 | AT5G44390.1 | FAD-binding domain-containing protein                                                              |
| A_84_P11416  | 0.638046 | AT1G03110.1 | transducin family protein / WD-40 repeat family protein                                            |
| A_84_P19182  | 0.638158 | AT2G03750.1 | sulfotransferase family protein                                                                    |
| A_84_P546306 | 0.639264 | AT1G60640.1 | similar to unknown protein [Arabidopsis thaliana] (TAIR:AT2G22795.1)                               |
| A_84_P797990 | 0.639343 | AT3G52430.1 | PAD4 (PHYTOALEXIN DEFICIENT 4); triacylglycerol lipase                                             |
| A_84_P19706  | 0.63959  | AT5G45000.1 | transmembrane receptor                                                                             |
| A_84_P125521 | 0.639727 | AT4G24210.1 | SLY1 (SLEEPY1)                                                                                     |
| A_84_P310373 | 0.640514 | AT2G28150.1 | similar to unknown protein [Arabidopsis thaliana] (TAIR:AT5G59790.1)                               |
| A_84_P766536 | 0.64057  | AT5G25220.1 | KNAT3 (KNOTTED1-LIKE HOMEODOMAIN GENE 3); transcription factor                                     |
| A_84_P248975 | 0.640886 | AT3G15460.1 | brix domain-containing protein                                                                     |
| A_84_P24133  | 0.642056 | AT3G55280.1 | 60S ribosomal protein L23A (RPL23aB)                                                               |
| A_84_P556854 | 0.642145 | AT1G25275.1 | similar to unnamed protein product [Vitis vinifera] (GB:CAO43403.1)                                |
| A_84_P21332  | 0.643007 | AT3G51870.1 | mitochondrial substrate carrier family protein                                                     |
| A_84_P535752 | 0.643184 | AT2G13790.1 | ATSERK4 (SOMATIC EMBRYOGENESIS RECEPTOR-LIKE KINASE 4)                                             |
| A_84_P12082  | 0.643278 | AT1G49620.1 | ICK5/ICN6/KRP7 (KIP-RELATED PROTEIN 7); cyclin binding / cyclin-dependent protein kinase inhibitor |
| A_84_P830254 | 0.643644 | AT3G50950.2 | disease resistance protein (CC-NBS-LRR class), putative                                            |
| A_84_P12054  | 0.643806 | AT5G07580.1 | DNA binding / transcription factor                                                                 |
| A_84_P806774 | 0.644223 | AT3G09440.1 | heat shock cognate 70 kDa protein 3 (HSC70-3) (HSP70-3)                                            |
| A_84_P23589  | 0.644292 | AT5G20160.1 | ribosomal protein L7Ae/L30e/S12e/Gadd45 family protein                                             |
| A_84_P11724  | 0.644669 | AT3G16150.1 | L-asparaginase, putative / L-asparagine amidohydrolase, putative                                   |
| A_84_P14086  | 0.645091 | AT5G59780.1 | MYB59 (myb domain protein 59); DNA binding / transcription factor                                  |
| A_84_P15083  | 0.645218 | AT5G19520.1 | mechanosensitive ion channel domain-containing protein / MS ion channel domain-containing protein  |
| A_84_P12416  | 0.645927 | AT1G72040.1 | deoxynucleoside kinase family                                                                      |
| A_84_P760674 | 0.646337 | AT3G16840.1 | ATP-dependent helicase                                                                             |
| A_84_P10343  | 0.646814 | AT5G16000.1 | NIK1 (NSP-INTERACTING KINASE 1); kinase                                                            |
| A_84_P19870  | 0.647501 | AT1G52140.1 | similar to unknown protein [Arabidopsis thaliana] (TAIR:AT3G16330.1)                               |

|              |          |             |                                                                                                 |
|--------------|----------|-------------|-------------------------------------------------------------------------------------------------|
| A_84_P12101  | 0.648207 | AT5G26180.1 | NOL1/NOP2/sun family protein                                                                    |
| A_84_P16146  | 0.648323 | AT1G64710.1 | alcohol dehydrogenase, putative                                                                 |
| A_84_P547377 | 0.648539 | AT2G43110.1 | similar to unnamed protein product [Vitis vinifera] (GB:CAO45289.1)                             |
| A_84_P18941  | 0.648595 | AT1G23000.1 | heavy-metal-associated domain-containing protein                                                |
| A_84_P817969 | 0.648701 | AT1G75390.2 | ATBZIP44 (ARABIDOPSIS THALIANA BASIC LEUCINE-ZIPPER 44)                                         |
| A_84_P17557  | 0.648851 | AT4G02290.1 | ATGH9B13 (ARABIDOPSIS THALIANA GLYCOSYL HYDROLASE 9B13)                                         |
| A_84_P15372  | 0.648888 | AT2G38750.1 | ANNAT4 (ANNEXIN ARABIDOPSIS 4); calcium ion binding / calcium-dependent phospholipid binding    |
| A_84_P18750  | 0.649094 | AT5G42230.1 | SCPL41 (serine carboxypeptidase-like 41); serine carboxypeptidase                               |
| A_84_P89769  | 0.649646 | AT2G35930.1 | U-box domain-containing protein                                                                 |
| A_84_P229479 | 0.649994 | AT4G22753.1 | SMO1-3 (STEROL 4-ALPHA METHYL OXIDASE); catalytic                                               |
| A_84_P15710  | 0.650095 | AT4G20110.1 | vacuolar sorting receptor, putative                                                             |
| A_84_P18279  | 0.650115 | AT2G18890.1 | protein kinase family protein                                                                   |
| A_84_P19993  | 0.650183 | AT1G74090.1 | sulfotransferase family protein                                                                 |
| A_84_P786702 | 0.650189 | AT3G09830.1 | protein kinase, putative                                                                        |
| A_84_P23301  | 0.650424 | AT4G25730.1 | FtsJ-like methyltransferase family protein                                                      |
| A_84_P826163 | 0.650953 | AT1G52160.1 | metallo-beta-lactamase family protein                                                           |
| A_84_P532232 | 0.651468 | AT2G23100.1 | DC1 domain-containing protein                                                                   |
| A_84_P259470 | 0.651949 | AT1G61890.1 | MATE efflux family protein                                                                      |
| A_84_P10015  | 0.652322 | AT4G10450.1 | 60S ribosomal protein L9 (RPL90D)                                                               |
| A_84_P832924 | 0.652533 | AT1G23280.1 | MAK16 protein-related                                                                           |
| A_84_P532420 | 0.653356 | AT3G30840.1 | unknown protein                                                                                 |
| A_84_P12672  | 0.653668 | AT3G15680.1 | zinc finger (Ran-binding) family protein                                                        |
| A_84_P23494  | 0.654077 | AT5G46100.1 | pentatricopeptide (PPR) repeat-containing protein                                               |
| A_84_P111702 | 0.654125 | AT3G13940.1 | DNA binding / DNA-directed RNA polymerase                                                       |
| A_84_P17344  | 0.655179 | AT2G22810.1 | ACS4 (1-AMINOCYCLOPROPANE-1-CARBOXYLATE SYNTHASE 4); 1-aminocyclopropane-1-carboxylate synthase |
| A_84_P24136  | 0.655397 | AT3G55940.1 | phosphoinositide-specific phospholipase C, putative                                             |
| A_84_P21919  | 0.655415 | AT1G25440.1 | zinc finger (B-box type) family protein                                                         |
| A_84_P16644  | 0.656278 | AT4G13260.1 | YUC2 (YUCCA2); FAD binding / NADP binding / flavin-containing monooxygenase/ oxidoreductase     |
| A_84_P13033  | 0.656726 | AT5G22650.1 | HD2B (HISTONE DEACETYLASE 2B)                                                                   |
| A_84_P23945  | 0.656848 | AT2G15040.1 | pseudogene, disease resistance protein-related                                                  |
| A_84_P151308 | 0.658407 | AT4G16630.1 | DEAD/DEAH box helicase, putative (RH28)                                                         |
| A_84_P19586  | 0.658463 | AT4G16600.1 | glycogenin glucosyltransferase (glycogenin)-related                                             |
| A_84_P200884 | 0.659254 | AT5G13750.1 | ZIFL1 (ZINC INDUCED FACILITATOR-LIKE 1); tetracycline:hydrogen                                  |

|              |          |             |                                                                                     |
|--------------|----------|-------------|-------------------------------------------------------------------------------------|
| A_84_P179384 | 0.659344 | AT2G24150.1 | antiporter/ transporter                                                             |
| A_84_P828934 | 0.660461 | AT4G01460.1 | HHP3 (heptahelical protein 3); receptor                                             |
| A_84_P18952  | 0.660795 | AT1G09460.1 | basic helix-loop-helix (bHLH) family protein                                        |
| A_84_P205748 | 0.661325 | AT1G71020.1 | glucan endo-1,3-beta-glucosidase-related                                            |
| A_84_P804411 | 0.661658 | AT1G33240.1 | armadillo/beta-catenin repeat family protein / U-box domain-containing protein      |
| A_84_P820750 | 0.661676 | AT1G23710.1 | AT-GTL1 (Arabidopsis thaliana GT2-like 1); transcription factor                     |
| A_84_P20994  | 0.662146 | AT1G51950.1 | similar to unknown protein [Arabidopsis thaliana] (TAIR:AT1G70420.1)                |
| A_84_P18580  | 0.662515 | AT4G27490.1 | IAA18 (indoleacetic acid-induced protein 18); transcription factor                  |
| A_84_P810497 | 0.662528 | AT1G23490.1 | 3' exoribonuclease family domain 1-containing protein                               |
| A_84_P15164  | 0.663162 | AT1G08940.1 | ATARF/ATARF1/ATARFA1A (ADP-RIBOSYLATION FACTOR 1)                                   |
| A_84_P19990  | 0.663412 | AT1G68810.1 | phosphoglycerate/bisphosphoglycerate mutase family protein                          |
| A_84_P161603 | 0.664818 | AT1G33260.1 | basic helix-loop-helix (bHLH) family protein                                        |
| A_84_P572033 | 0.664846 | AT1G61970.1 | protein kinase family protein                                                       |
| A_84_P768923 | 0.665302 | AT5G44574.1 | mitochondrial transcription termination factor-related / mTERF-related              |
| A_84_P19743  | 0.665806 | AT5G55250.1 | similar to unknown protein [Arabidopsis thaliana] (TAIR:AT5G44572.1)                |
| A_84_P22960  | 0.665835 | AT2G28000.1 | IAMT1 (IAA CARBOXYLMETHYLTRANSFERASE 1)                                             |
| A_84_P560583 | 0.665968 | AT2G18680.1 | CPN60A (chloroplast / 60 kDa chaperonin alpha subunit)                              |
| A_84_P14116  | 0.666017 | AT5G66790.1 | similar to unknown protein [Arabidopsis thaliana] (TAIR:AT2G18690.1)                |
| A_84_P868270 | 0.666069 | AT5G52470.1 | protein kinase family protein                                                       |
| A_84_P20240  | 0.666136 | AT3G21660.1 | FIB1 (FIBRILLARIN 1)                                                                |
| A_84_P12050  | 0.666967 | AT1G06550.1 | UBX domain-containing protein                                                       |
| A_84_P286710 | 0.667282 | AT3G45160.1 | enoyl-CoA hydratase/isomerase family protein                                        |
| A_84_P23248  | 0.667301 | AT4G08850.1 | contains domain PROKAR_LIPOPROTEIN (PS51257)                                        |
| A_84_P16285  | 0.667325 | AT2G29720.1 | leucine-rich repeat family protein / protein kinase family protein                  |
| A_84_P210278 | 0.668235 | AT1G66700.1 | CTF2B; monooxygenase                                                                |
| A_84_P17908  | 0.669044 | AT5G16750.1 | PXMT1; S-adenosylmethionine-dependent methyltransferase                             |
| A_84_P165553 | 0.669659 | AT2G18900.1 | TOZ (TORMOZEMBRYO DEFECTIVE); nucleotide binding                                    |
| A_84_P825989 | 0.670043 | AT5G48470.1 | transducin family protein / WD-40 repeat family protein                             |
| A_84_P810257 | 0.670075 | AT1G59359.1 | similar to unnamed protein product [Vitis vinifera] (GB:CAO17042.1)                 |
| A_84_P20004  | 0.670142 | AT1G72660.1 | 40S ribosomal protein S2 (RPS2B)                                                    |
| A_84_P100746 | 0.670143 | AT3G28220.1 | developmentally regulated GTP-binding protein, putative                             |
| A_84_P16525  | 0.670892 | AT3G46210.1 | meprin and TRAF homology domain-containing protein / MATH domain-containing protein |
| A_84_P858457 | 0.671415 | AT4G28450.1 | 3' exoribonuclease family domain 1-containing protein                               |
| A_84_P24021  | 0.671453 | AT3G27690.1 | transducin family protein / WD-40 repeat family protein                             |
|              |          |             | LHCB2:4 (Photosystem II light harvesting complex gene 2.3)                          |

|              |          |             |                                                                                           |
|--------------|----------|-------------|-------------------------------------------------------------------------------------------|
| A_84_P17703  | 0.671631 | AT5G01210.1 | transferase family protein                                                                |
| A_84_P849546 | 0.672812 | AT2G43830.1 | pseudogene, NPK1-related protein kinase 3                                                 |
| A_84_P20552  | 0.673697 | AT5G04490.1 | VTE5 (VITAMIN E PATHWAY GENE5); phosphatidate<br>cytidyltransferase/ phytol kinase        |
| A_84_P798326 | 0.674181 | AT5G50670.1 | squamosa promoter-binding protein, putative                                               |
| A_84_P841143 | 0.674933 | AT3G28170.1 | unknown protein                                                                           |
| A_84_P21383  | 0.674967 | AT4G19540.1 | similar to HCF101 (HIGH-CHLOROPHYLL-FLUORESCENCE 101), ATP<br>binding                     |
| A_84_P830750 | 0.675106 | AT5G44560.2 | VPS2.2                                                                                    |
| A_84_P846903 | 0.675517 | AT1G62800.2 | ASP4 (ASPARTATE AMINOTRANSFERASE 4)                                                       |
| A_84_P824914 | 0.675643 | AT4G18205.1 | AT4G18200                                                                                 |
| A_84_P189784 | 0.676124 | AT3G18690.1 | MKS1 (MAP KINASE SUBSTRATE 1)                                                             |
| A_84_P65264  | 0.67622  | AT3G15356.1 | legume lectin family protein                                                              |
| A_84_P17795  | 0.676239 | AT5G39840.1 | ATP-dependent RNA helicase, mitochondrial, putative                                       |
| A_84_P18514  | 0.676287 | AT1G06000.1 | UDP-glucuronosyl/UDP-glucosyl transferase family protein                                  |
| A_84_P786320 | 0.676476 | AT5G35935.1 | transposable element gene                                                                 |
| A_84_P247395 | 0.677637 | AT3G26470.1 | similar to ADR1-L1 (ADR1-LIKE 1), ATP binding / protein binding                           |
| A_84_P21755  | 0.677677 | AT1G23480.1 | ATCSLA03 (Cellulose synthase-like A3); transferase, transferring glycosyl<br>groups       |
| A_84_P858464 | 0.678291 | AT3G10020.1 | similar to Os12g0147200 [Oryza sativa (japonica cultivar-group)]<br>(GB:NP_001066153.1)   |
| A_84_P540276 | 0.679435 | AT2G41905.1 | unknown protein                                                                           |
| A_84_P824985 | 0.679525 | AT2G18670.1 | zinc finger (C3HC4-type RING finger) family protein                                       |
| A_84_P23251  | 0.679668 | AT4G09570.1 | CPK4 (calcium-dependent protein kinase 4); calmodulin-dependent protein<br>kinase/ kinase |
| A_84_P846870 | 0.679868 | AT1G25550.1 | myb family transcription factor                                                           |
| A_84_P10429  | 0.68008  | AT1G08580.1 | similar to Pm52 [Prunus mume] (GB:BAE48663.1)                                             |
| A_84_P11705  | 0.68031  | AT3G10870.1 | hydrolase, alpha/beta fold family protein                                                 |
| A_84_P20984  | 0.680592 | AT1G02850.1 | glycosyl hydrolase family 1 protein                                                       |
| A_84_P769664 | 0.680772 | AT5G61310.4 | cytochrome c oxidase subunit Vc, putative / COX5C, putative                               |
| A_84_P856356 | 0.680897 | AT5G40770.1 | ATPHB3 (PROHIBITIN 3)                                                                     |
| A_84_P857301 | 0.681335 | AT2G40140.1 | CZF1/ZFAR1; transcription factor                                                          |
| A_84_P11616  | 0.681628 | AT2G26330.1 | ER (ERECTA)                                                                               |
| A_84_P23394  | 0.682949 | AT5G05730.1 | ASA1 (ANTHRANILATE SYNTHASE ALPHA SUBUNIT 1); anthranilate<br>synthase                    |
| A_84_P800509 | 0.682981 | AT4G08920.1 | CRY1 (CRYPTOCHROME 1)                                                                     |
| A_84_P21934  | 0.683197 | AT1G31970.1 | STRS1 (STRESS RESPONSE SUPPRESSOR 1); ATP-dependent helicase                              |

|              |          |             |                                                                                   |
|--------------|----------|-------------|-----------------------------------------------------------------------------------|
| A_84_P16994  | 0.684114 | AT2G20835.1 | similar to unknown protein [Arabidopsis thaliana] (TAIR:AT3G15534.1)              |
| A_84_P15107  | 0.684372 | AT2G31725.1 | similar to unknown protein [Arabidopsis thaliana] (TAIR:AT1G05730.1)              |
| A_84_P14703  | 0.68542  | AT1G05835.1 | similar to unknown protein [Arabidopsis thaliana] (TAIR:AT1G32583.1)              |
| A_84_P829713 | 0.685673 | AT5G67340.1 | armadillo/beta-catenin repeat family protein / U-box domain-containing protein    |
| A_84_P867471 | 0.685958 | AT5G19240.1 | Identical to Uncharacterized GPI-anchored protein At5g19240 precursor             |
| A_84_P20108  | 0.685965 | AT2G43020.1 | ATPAO2 (POLYAMINE OXIDASE 2)                                                      |
| A_84_P130336 | 0.686266 | AT1G75840.1 | ATGP3/ATROP4 (RHO-LIKE GTP BINDING PROTEIN 4); GTP binding / GTPase               |
| A_84_P11649  | 0.686616 | AT2G19590.1 | ACO1 (ACC OXIDASE 1); 1-aminocyclopropane-1-carboxylate oxidase                   |
| A_84_P22249  | 0.687841 | AT3G57120.1 | protein kinase family protein                                                     |
| A_84_P528720 | 0.687872 | AT2G32340.1 | TraB family protein                                                               |
| A_84_P20212  | 0.687915 | AT3G04710.1 | ankyrin repeat family protein                                                     |
| A_84_P14317  | 0.688071 | AT1G69830.1 | AMY3/ATAMY3 (ALPHA-AMYLASE-LIKE 3); alpha-amylase                                 |
| A_84_P23291  | 0.688628 | AT4G23550.1 | WRKY29 (WRKY DNA-binding protein 29); transcription factor                        |
| A_84_P19460  | 0.689578 | AT4G05410.1 | transducin family protein / WD-40 repeat family protein                           |
| A_84_P825740 | 0.689689 | AT3G04770.1 | RPSAB (40S RIBOSOMAL PROTEIN SA B); structural constituent of ribosome            |
| A_84_P11833  | 0.690052 | AT3G53830.1 | regulator of chromosome condensation (RCC1) family protein                        |
| A_84_P809013 | 0.690442 | AT1G15820.1 | LHCB6 (LIGHT HARVESTING COMPLEX PSII); chlorophyll binding                        |
| A_84_P155965 | 0.690699 | AT5G12080.1 | mechanosensitive ion channel domain-containing protein                            |
| A_84_P221098 | 0.690791 | AT5G02590.1 | chloroplast lumen common family protein                                           |
| A_84_P19044  | 0.691263 | AT1G21440.1 | mutase family protein                                                             |
| A_84_P764548 | 0.692442 | AT4G18197.1 | AT4G18200/ATPUP7/PEX17 (ARABIDOPSIS THALIANA PURINE PERMEASE 7)                   |
| A_84_P312833 | 0.69252  | AT1G66480.1 | PMI2 (plastid movement impaired 2)                                                |
| A_84_P10602  | 0.693469 | AT2G42030.1 | zinc finger (C3HC4-type RING finger) family protein                               |
| A_84_P240305 | 0.694366 | AT2G46550.1 | similar to unknown protein [Arabidopsis thaliana] (TAIR:AT1G01240.3)              |
| A_84_P822292 | 0.696711 | AT4G20020.1 | similar to unknown protein [Arabidopsis thaliana] (TAIR:AT5G44780.1)              |
| A_84_P218778 | 0.697736 | AT5G66480.1 | similar to unknown protein [Arabidopsis thaliana] (TAIR:AT3G50910.1)              |
| A_84_P21099  | 0.697849 | AT2G40360.1 | transducin family protein / WD-40 repeat family protein [AT2G40360.1]             |
| A_84_P243945 | 0.698119 | AT5G22580.1 | Identical to Uncharacterized protein At5g22580 [Arabidopsis Thaliana] (GB:Q9FK81) |
| A_84_P22097  | 0.698183 | AT3G10530.1 | transducin family protein / WD-40 repeat family protein                           |
| A_84_P761404 | 0.698275 | AT3G21460.1 | electron carrier/ protein disulfide oxidoreductase                                |
| A_84_P87289  | 0.698784 | AT1G25083.1 | anthranilate synthase beta subunit, putative                                      |
| A_84_P13990  | 0.698904 | AT5G26010.1 | protein serine/threonine phosphatase                                              |

|              |          |             |                                                                                 |
|--------------|----------|-------------|---------------------------------------------------------------------------------|
| A_84_P14798  | 0.69909  | AT4G27900.1 | similar to unknown protein [Arabidopsis thaliana] (TAIR:AT5G53420.1)            |
| A_84_P11458  | 0.699108 | AT1G80270.1 | DNA-binding protein, putative                                                   |
| A_84_P18589  | 0.699184 | AT4G29510.1 | ATPRMT11/PRMT11 (ARABIDOPSIS ARGININE METHYLTRANSFERASE 11)                     |
| A_84_P21701  | 0.69944  | AT5G08320.1 | similar to unnamed protein product [Vitis vinifera] (GB:CAO70168.1)             |
| A_84_P12888  | 0.699745 | AT4G23600.1 | CORI3 (CORONATINE INDUCED 1, JASMONIC ACID RESPONSIVE 2); transaminase          |
| A_84_P750311 | 0.700506 | AT1G72120.1 | transporter                                                                     |
| A_84_P560054 | 0.701071 | AT4G29905.1 | similar to unknown protein [Arabidopsis thaliana] (TAIR:AT5G57123.1)            |
| A_84_P767658 | 0.701319 | AT5G55420.1 | Encodes a Protease inhibitor/seed storage/LTP family protein [pseudogene]       |
| A_84_P15417  | 0.701656 | AT2G05940.1 | protein kinase, putative                                                        |
| A_84_P15784  | 0.701732 | AT4G37970.1 | mannitol dehydrogenase, putative                                                |
| A_84_P572395 | 0.701748 | AT3G61450.1 | SYP73 (SYNTAXIN OF PLANTS 73)                                                   |
| A_84_P12792  | 0.703296 | AT3G56990.1 | EDA7 (embryo sac development arrest 7)                                          |
| A_84_P853930 | 0.703454 | AT3G50480.1 | HR4 (HOMOLOG OF RPW8 4)                                                         |
| A_84_P564918 | 0.704736 | AT1G69280.1 | similar to unknown protein [Arabidopsis thaliana] (TAIR:AT2G03630.1)            |
| A_84_P198494 | 0.70561  | AT5G61880.1 | signaling molecule-related                                                      |
| A_84_P17267  | 0.706649 | AT2G41410.1 | calmodulin, putative                                                            |
| A_84_P811334 | 0.70712  | AT3G57150.1 | NAP57 (ARABIDOPSIS THALIANA HOMOLOGUE OF NAP57)                                 |
| A_84_P756180 | 0.70761  | AT2G14890.2 | AGP9 (ARABINO GALACTAN PROTEIN 9)                                               |
| A_84_P245725 | 0.708037 | AT5G50010.1 | transcription factor/ transcription regulator                                   |
| A_84_P287570 | 0.708087 | AT5G55180.1 | glycosyl hydrolase family 17 protein                                            |
| A_84_P196034 | 0.708563 | AT5G05090.1 | myb family transcription factor                                                 |
| A_84_P16458  | 0.708972 | AT3G23570.1 | dienelactone hydrolase family protein                                           |
| A_84_P13545  | 0.709015 | AT2G34357.1 | binding                                                                         |
| A_84_P166063 | 0.709529 | AT4G15620.1 | integral membrane family protein                                                |
| A_84_P22041  | 0.710343 | AT2G37600.1 | 60S ribosomal protein L36 (RPL36A)                                              |
| A_84_P187914 | 0.711114 | AT3G58620.1 | TTL4 (TETRATRICOPETIDE-REPEAT THIOREDOXIN-LIKE 4); binding                      |
| A_84_P119812 | 0.711122 | AT1G50740.1 | similar to unknown protein [Arabidopsis thaliana] (TAIR:AT3G20510.1)            |
| A_84_P20451  | 0.711291 | AT4G23010.1 | ATUTR2/UTR2 (UDP-GALACTOSE TRANSPORTER 2)                                       |
| A_84_P826004 | 0.71154  | AT1G07000.1 | ATEXO70B2 (exocyst subunit EXO70 family protein B2); protein binding            |
| A_84_P521249 | 0.711725 | AT5G54400.1 | methyltransferase                                                               |
| A_84_P862462 | 0.711939 | AT1G20780.1 | armadillo/beta-catenin repeat protein-related / U-box domain-containing protein |
| A_84_P855512 | 0.712121 | AT1G68190.1 | zinc finger (B-box type) family protein                                         |
| A_84_P16687  | 0.712236 | AT1G21920.1 | MORN (Membrane Occupation and Recognition Nexus)                                |

|              |          |             |                                                                                 |
|--------------|----------|-------------|---------------------------------------------------------------------------------|
| A_84_P16367  | 0.712455 | AT2G24120.1 | PDE319/SCA3 (SCABRA 3); DNA binding / DNA-directed RNA polymerase               |
| A_84_P303420 | 0.712604 | AT3G07540.1 | formin homology 2 domain-containing protein / FH2 domain-containing protein     |
| A_84_P851116 | 0.712687 | AT2G46780.1 | RNA recognition motif (RRM)-containing protein                                  |
| A_84_P760885 | 0.712829 | AT3G20310.1 | ATERF-7/ATERF7/ERF7 (ETHYLENE RESPONSE FACTOR7)                                 |
| A_84_P529024 | 0.712916 | AT4G28180.1 | unknown protein                                                                 |
| A_84_P21910  | 0.713648 | AT1G12710.1 | ATPP2-A12 (PHLOEM PROTEIN 2-A12); carbohydrate binding                          |
| A_84_P548619 | 0.713722 | AT5G14930.2 | SAG101 (SENESCENCE-ASSOCIATED GENE 101); triacylglycerol lipase                 |
| A_84_P72974  | 0.714017 | AT5G50570.1 | squamosa promoter-binding protein, putative                                     |
| A_84_P23486  | 0.714363 | AT5G44160.1 | NUC (NUTCRACKER); nucleic acid binding / transcription factor/ zinc ion binding |
| A_84_P536970 | 0.714845 | AT4G13750.1 | ATP binding                                                                     |
| A_84_P785044 | 0.714982 | AT2G27840.1 | HDT4 (histone deacetylase 13)                                                   |
| A_84_P765572 | 0.715394 | AT4G13494.1 | MIR863a; miRNA                                                                  |
| A_84_P766792 | 0.715464 | AT5G51540.1 | metalloendopeptidase                                                            |
| A_84_P806680 | 0.716058 | AT3G03780.1 | AtMS2 (Arabidopsis thaliana methionine synthase 2)                              |
| A_84_P13006  | 0.716254 | AT5G10180.1 | AST68 (Sulfate transporter 2.1)                                                 |
| A_84_P19572  | 0.716385 | AT4G38890.1 | dihydrouridine synthase family protein                                          |
| A_84_P245045 | 0.718362 | AT5G64660.1 | U-box domain-containing protein                                                 |
| A_84_P17654  | 0.718942 | AT4G31980.1 | similar to unknown protein [Arabidopsis thaliana] (TAIR:AT5G11290.1)            |
| A_84_P16692  | 0.719692 | AT4G28400.1 | protein phosphatase 2C, putative / PP2C, putative                               |
| A_84_P19701  | 0.71982  | AT5G43810.1 | ZLL (ZWILLE)                                                                    |
| A_84_P803516 | 0.719886 | AT3G02170.1 | LNG2 (LONGIFOLIA2)                                                              |
| A_84_P16642  | 0.720218 | AT4G12720.1 | AtNUDT7 (ARABIDOPSIS THALIANA NUDIX HYDROLASE HOMOLOG 7)                        |
| A_84_P106792 | 0.720354 | AT4G11550.1 | DC1 domain-containing protein                                                   |
| A_84_P576905 | 0.720963 | AT4G16515.1 | unknown protein                                                                 |
| A_84_P20129  | 0.721054 | AT2G39110.1 | protein kinase, putative                                                        |
| A_84_P51080  | 0.721205 | AT1G52930.1 | brix domain-containing protein                                                  |
| A_84_P20106  | 0.721212 | AT1G04870.1 | protein arginine N-methyltransferase family protein                             |
| A_84_P65644  | 0.721228 | AT5G44060.1 | similar to unknown protein [Arabidopsis thaliana] (TAIR:AT1G04000.1)            |
| A_84_P141279 | 0.722163 | AT1G18000.1 | similar to unknown protein [Arabidopsis thaliana] (TAIR:AT1G18010.1)            |
| A_84_P297244 | 0.722495 | AT2G17250.1 | EMB2762 (EMBRYO DEFECTIVE 2762)                                                 |
| A_84_P12616  | 0.722506 | AT2G32220.1 | 60S ribosomal protein L27 (RPL27A)                                              |
| A_84_P22532  | 0.722563 | AT5G41740.1 | disease resistance protein (TIR-NBS-LRR class), putative                        |
| A_84_P18126  | 0.722574 | AT1G18250.1 | ATLP-1 (Arabidopsis thaumatin-like protein 1)                                   |

|              |          |             |                                                                                           |
|--------------|----------|-------------|-------------------------------------------------------------------------------------------|
| A_84_P10525  | 0.722709 | AT1G72125.1 | transporter                                                                               |
| A_84_P20783  | 0.723327 | AT2G14080.1 | disease resistance protein (TIR-NBS-LRR class), putative                                  |
| A_84_P168163 | 0.723379 | AT5G56030.1 | HSP81-2 (EARLY-RESPONSIVE TO DEHYDRATION 8); ATP binding                                  |
| A_84_P16511  | 0.723463 | AT3G12270.1 | methyltransferase                                                                         |
| A_84_P15906  | 0.724212 | AT5G40380.1 | protein kinase family protein                                                             |
| A_84_P17925  | 0.724446 | AT5G11060.1 | KNAT4 (KNOTTED1-LIKE HOMEODOMAIN GENE 4); transcription factor                            |
| A_84_P160413 | 0.724513 | AT3G44750.1 | HD2A (HISTONE DEACETYLASE 2A); nucleic acid binding / zinc ion binding                    |
| A_84_P22947  | 0.724823 | AT2G26700.1 | protein kinase family protein                                                             |
| A_84_P15749  | 0.725555 | AT4G29030.1 | glycine-rich protein                                                                      |
| A_84_P785527 | 0.72786  | AT4G04830.1 | methionine sulfoxide reductase domain-containing protein / SeIR domain-containing protein |
| A_84_P14024  | 0.729712 | AT5G43020.1 | leucine-rich repeat transmembrane protein kinase, putative                                |
| A_84_P764555 | 0.729844 | AT4G18195.1 | AT4G18200/ATPUP8 (Arabidopsis thaliana purine permease 8)                                 |
| A_84_P21825  | 0.729852 | AT1G13210.1 | ACA.L (AUTOINHIBITED CA <sup>2+</sup> /ATPASE II)                                         |
| A_84_P311333 | 0.729995 | AT2G38110.1 | ATGPAT6/GPAT6 (GLYCEROL-3-PHOSPHATE ACYLTRANSFERASE 6)                                    |
| A_84_P10582  | 0.730209 | AT1G78600.1 | zinc finger (B-box type) family protein                                                   |
| A_84_P12545  | 0.730589 | AT2G01940.1 | ATIDD15/SGR5 (ARABIDOPSIS THALIANA INDETERMINATE(ID)-DOMAIN 15, SHOOT GRAVITROPISM 5)     |
| A_84_P595814 | 0.730935 | AT5G40800.1 | similar to unknown protein [Arabidopsis thaliana] (TAIR:AT3G27250.1)                      |
| A_84_P193364 | 0.731133 | AT1G56660.1 | unknown protein                                                                           |
| A_84_P541226 | 0.731628 | AT3G11964.1 | S1 RNA-binding domain-containing protein                                                  |
| A_84_P23094  | 0.732528 | AT3G12860.1 | nucleolar protein Nop56, putative                                                         |
| A_84_P551242 | 0.732674 | AT5G06550.1 | Identical to F-box protein At5g06550 [Arabidopsis Thaliana] (GB:Q67XX3;GB:Q9FG15)         |
| A_84_P151898 | 0.732819 | AT1G58983.1 | 40S ribosomal protein S2, putative                                                        |
| A_84_P155785 | 0.732959 | AT3G07390.1 | AIR12 (Auxin-Induced in Root cultures 12); extracellular matrix structural constituent    |
| A_84_P767969 | 0.733019 | AT5G23260.2 | TT16 (TRANSPARENT TESTA16); transcription factor                                          |
| A_84_P161393 | 0.733581 | AT3G18050.1 | similar to unknown protein [Arabidopsis thaliana] (TAIR:AT4G28100.1)                      |
| A_84_P187774 | 0.733707 | AT5G44930.1 | ARAD2 (ARABINAN DEFICIENT 2); catalytic                                                   |
| A_84_P19108  | 0.733998 | AT1G30280.1 | heat shock protein binding                                                                |
| A_84_P16491  | 0.734409 | AT3G13470.1 | chaperonin, putative                                                                      |
| A_84_P109442 | 0.734875 | AT3G52180.1 | ATPTPKIS1/DSP4/SEX4 (STARCH-EXCESS 4)                                                     |
| A_84_P23923  | 0.734976 | AT2G37900.1 | proton-dependent oligopeptide transport (POT) family protein [AT2G37900.1]                |



|              |          |             |                                                                             |
|--------------|----------|-------------|-----------------------------------------------------------------------------|
| A_84_P17468  | 0.735898 | AT3G45650.1 | NAXT1 (NITRATE EXCRETION TRANSPORTER1)                                      |
| A_84_P230129 | 0.736507 | AT3G09490.1 | chloroplast lumen common family protein                                     |
| A_84_P565460 | 0.737079 | AT5G19260.1 | similar to unknown protein [Arabidopsis thaliana] (TAIR:AT3G06020.1)        |
| A_84_P15276  | 0.738411 | AT1G76680.1 | OPR1 (12-oxophytodienoate reductase 1); 12-oxophytodienoate reductase       |
| A_84_P75894  | 0.738909 | AT2G46720.1 | HIC (HIGH CARBON DIOXIDE); acyltransferase                                  |
| A_84_P761766 | 0.739289 | AT3G12965.1 | other RNA                                                                   |
| A_84_P505748 | 0.740502 | AT3G11640.1 | unknown protein                                                             |
| A_84_P765758 | 0.740803 | AT4G12334.1 | pseudogene of cytochrome P450 family protein                                |
| A_84_P10477  | 0.74316  | AT1G13080.1 | CYP71B2 (CYTOCHROME P450 71B2); oxygen binding                              |
| A_84_P21477  | 0.74329  | AT1G19340.1 | methyltransferase MT-A70 family protein                                     |
| A_84_P12443  | 0.744636 | AT1G80440.1 | kelch repeat-containing F-box family protein                                |
| A_84_P11644  | 0.74498  | AT2G37460.1 | nodulin MtN21 family protein                                                |
| A_84_P21632  | 0.745226 | AT5G54380.1 | THE1 (THESEUS1); kinase/ protein kinase                                     |
| A_84_P109752 | 0.745644 | AT5G24990.1 | similar to unknown protein [Arabidopsis thaliana] (TAIR:AT5G25010.1)        |
| A_84_P15638  | 0.745747 | AT3G59790.1 | ATMPK10 (Arabidopsis thaliana MAP kinase 10); MAP kinase/ kinase            |
| A_84_P20511  | 0.745898 | AT4G37450.1 | AGP18 (Arabinogalactan protein 18)                                          |
| A_84_P271630 | 0.746487 | AT1G44446.1 | CH1 (CHLOROPHYLL B BIOSYNTHESIS); chlorophyllide a oxygenase                |
| A_84_P116472 | 0.747151 | AT3G55510.1 | similar to unknown protein [Arabidopsis thaliana] (TAIR:AT2G18220.1)        |
| A_84_P606349 | 0.747377 | AT4G28460.1 | unknown protein                                                             |
| A_84_P16959  | 0.747563 | AT5G15700.1 | DNA-directed RNA polymerase (RPOT2)                                         |
| A_84_P17923  | 0.747882 | AT5G28770.1 | BZO2H3 (ARABIDOPSIS THALIANA BASIC LEUCINE ZIPPER 63)                       |
| A_84_P505670 | 0.74817  | AT2G36080.1 | DNA-binding protein, putative                                               |
| A_84_P18784  | 0.748481 | AT5G51460.1 | ATTPPA (Arabidopsis thaliana trehalose-6-phosphate phosphatase)             |
| A_84_P19203  | 0.748622 | AT2G04400.1 | indole-3-glycerol phosphate synthase (IGPS)                                 |
| A_84_P521606 | 0.74875  | AT2G25260.1 | similar to unknown protein [Arabidopsis thaliana] (TAIR:AT5G25265.1)        |
| A_84_P574909 | 0.748835 | AT3G05130.1 | similar to unknown protein [Arabidopsis thaliana] (TAIR:AT5G27330.1)        |
| A_84_P164843 | 0.749364 | AT3G27550.1 | group II intron splicing factor CRS1-related                                |
| A_84_P766447 | 0.749979 | AT5G02500.1 | HSC70-1 (heat shock cognate 70 kDa protein 1); ATP binding                  |
| A_84_P14392  | 0.750253 | AT2G43550.1 | trypsin inhibitor, putative                                                 |
| A_84_P12758  | 0.7504   | AT3G49410.1 | similar to unknown protein [Arabidopsis thaliana] (TAIR:AT5G24450.1)        |
| A_84_P825596 | 0.750728 | AT1G15570.1 | CYCA2;3 (CYCLIN A2;3); cyclin-dependent protein kinase regulator            |
| A_84_P16890  | 0.75111  | AT5G50800.1 | nodulin MtN3 family protein                                                 |
| A_84_P255680 | 0.751542 | AT5G05960.1 | protease inhibitor/seed storage/lipid transfer protein (LTP) family protein |
| A_84_P13704  | 0.752491 | AT3G49680.1 | ATBCAT-3/BCAT3 (BRANCHED-CHAIN AMINOTRANSFERASE 3)                          |
| A_84_P23651  | 0.754336 | AT1G03840.1 | MGP (MAGPIE)                                                                |
| A_84_P99616  | 0.75445  | AT5G08360.1 | similar to unknown protein [Arabidopsis thaliana] (TAIR:AT5G23380.1)        |
| A_84_P858196 | 0.754664 | AT1G72820.1 | mitochondrial substrate carrier family protein                              |

|              |          |             |                                                                                           |
|--------------|----------|-------------|-------------------------------------------------------------------------------------------|
| A_84_P19923  | 0.75488  | AT1G05680.1 | UDP-glucuronosyl/UDP-glucosyl transferase family protein                                  |
| A_84_P19196  | 0.755198 | AT1G75490.1 | DNA binding / transcription factor                                                        |
| A_84_P524292 | 0.75606  | AT2G32530.1 | ATCSLB03 (Cellulose synthase-like B3)                                                     |
| A_84_P10296  | 0.756356 | AT5G57660.1 | zinc finger (B-box type) family protein                                                   |
| A_84_P13265  | 0.756424 | AT1G08610.1 | pentatricopeptide (PPR) repeat-containing protein                                         |
| A_84_P760113 | 0.756489 | AT3G30885.1 | pseudogene, putative phosphate/phosphoenolpyruvate translocator precursor                 |
| A_84_P574446 | 0.756834 | AT5G50950.1 | fumarate hydratase, putative / fumarase, putative                                         |
| A_84_P10784  | 0.757256 | AT3G21540.1 | transducin family protein / WD-40 repeat family protein                                   |
| A_84_P14716  | 0.757841 | AT4G01440.1 | nodulin MtN21 family protein                                                              |
| A_84_P19209  | 0.758284 | AT2G38290.1 | ATAMT2 (AMMONIUM TRANSPORTER 2)                                                           |
| A_84_P819537 | 0.758287 | AT2G34770.1 | FAH1 (FATTY ACID HYDROXYLASE 1)                                                           |
| A_84_P10613  | 0.758795 | AT2G42530.1 | COR15B                                                                                    |
| A_84_P12022  | 0.760989 | AT4G16700.1 | PSD1 (PHOSPHATIDYLSERINE DECARBOXYLASE 1)                                                 |
| A_84_P609369 | 0.761618 | AT1G31550.1 | GDSL-motif lipase, putative                                                               |
| A_84_P764120 | 0.761669 | AT4G21830.1 | methionine sulfoxide reductase domain-containing protein / SeIR domain-containing protein |
| A_84_P17527  | 0.762912 | AT3G59110.1 | protein kinase family protein                                                             |
| A_84_P12342  | 0.763058 | AT1G12090.1 | ELP (EXTENSIN-LIKE PROTEIN); lipid binding                                                |
| A_84_P856538 | 0.764506 | AT1G26920.1 | similar to unknown protein [Arabidopsis thaliana] (TAIR:AT1G69760.1)                      |
| A_84_P531612 | 0.765986 | AT4G04745.1 | similar to unknown protein [Arabidopsis thaliana] (TAIR:AT4G21902.1)                      |
| A_84_P18552  | 0.767117 | AT4G21120.1 | AAT1 (CATIONIC AMINO ACID TRANSPORTER 1)                                                  |
| A_84_P14106  | 0.767139 | AT5G64310.1 | AGP1 (ARABINOGLACTAN-PROTEIN 1)                                                           |
| A_84_P14848  | 0.767589 | AT4G14130.1 | XTR7 (XYLOGLUCAN ENDOTRANSGLYCOSYLASE 7)                                                  |
| A_84_P19443  | 0.767591 | AT4G01010.1 | ATCNGC13 (cyclic nucleotide gated channel 13)                                             |
| A_84_P767917 | 0.767715 | AT5G44720.1 | molybdenum cofactor sulfurase family protein                                              |
| A_84_P14951  | 0.767777 | AT5G38020.1 | S-adenosyl-L-methionine:carboxyl methyltransferase family protein                         |
| A_84_P810430 | 0.76786  | AT3G47470.1 | LHCA4 (Photosystem I light harvesting complex gene 4)                                     |
| A_84_P24066  | 0.76832  | AT3G18600.1 | DEAD/DEAH box helicase, putative                                                          |
| A_84_P193844 | 0.769029 | AT5G42965.1 | nucleic acid binding / ribonuclease H                                                     |
| A_84_P11244  | 0.769135 | AT5G58430.1 | ATEXO70B1 (exocyst subunit EXO70 family protein B1)                                       |
| A_84_P522542 | 0.770411 | AT2G39240.1 | RNA polymerase I transcription factor                                                     |
| A_84_P68154  | 0.770788 | AT3G22660.1 | rRNA processing protein-related                                                           |
| A_84_P15150  | 0.770894 | AT1G24100.1 | UGT74B1 (UDP-glucosyl transferase 74B1)                                                   |
| A_84_P19271  | 0.771042 | AT3G09680.1 | 40S ribosomal protein S23 (RPS23A)                                                        |
| A_84_P75674  | 0.771261 | AT4G03440.1 | ankyrin repeat family protein                                                             |
| A_84_P14748  | 0.7714   | AT1G17420.1 | LOX3 (Lipoxygenase 3)                                                                     |
| A_84_P19127  | 0.771643 | AT2G14860.1 | peroxisomal membrane protein 22 kDa, putative                                             |

|              |          |             |                                                                                            |
|--------------|----------|-------------|--------------------------------------------------------------------------------------------|
| A_84_P22813  | 0.771828 | AT1G77550.1 | protein binding / tubulin-tyrosine ligase                                                  |
| A_84_P767243 | 0.771841 | AT5G28287.1 | pseudogene, hypothetical protein                                                           |
| A_84_P13078  | 0.771963 | AT5G42650.1 | AOS (ALLENE OXIDE SYNTHASE); hydro-lyase/ oxygen binding                                   |
| A_84_P785683 | 0.772657 | AT1G27770.1 | ACA1 (autoinhibited Ca <sup>2+</sup> -ATPase 1)                                            |
| A_84_P23998  | 0.772998 | AT1G53430.1 | leucine-rich repeat family protein / protein kinase family protein                         |
| A_84_P551948 | 0.773796 | AT3G55160.1 | similar to unnamed protein product [Vitis vinifera] (GB:CAO14954.1)                        |
| A_84_P15304  | 0.773862 | AT1G65390.1 | ATPP2-A5; carbohydrate binding                                                             |
| A_84_P17810  | 0.774072 | AT1G49840.1 | similar to unknown protein [Arabidopsis thaliana] (TAIR:AT3G19540.1)                       |
| A_84_P820385 | 0.7757   | AT3G12700.1 | aspartyl protease family protein                                                           |
| A_84_P16698  | 0.775701 | AT4G29700.1 | type I phosphodiesterase/nucleotide pyrophosphatase family protein                         |
| A_84_P543741 | 0.775729 | AT2G18220.1 | Identical to Nucleolar complex protein 2 homolog [Arabidopsis Thaliana] (GB:Q9ZPV5)        |
| A_84_P546454 | 0.775787 | AT2G31730.1 | ethylene-responsive protein, putative                                                      |
| A_84_P124042 | 0.777235 | AT3G08640.1 | alphavirus core protein family                                                             |
| A_84_P599761 | 0.777554 | AT2G17550.1 | similar to unknown protein [Arabidopsis thaliana] (TAIR:AT5G02390.1)                       |
| A_84_P819957 | 0.777937 | AT2G14750.1 | APK (APS KINASE)                                                                           |
| A_84_P19407  | 0.778223 | AT3G56070.1 | ROC2 (rotamase CyP 2); peptidyl-prolyl cis-trans isomerase                                 |
| A_84_P14110  | 0.778665 | AT5G65350.1 | histone H3                                                                                 |
| A_84_P207518 | 0.779724 | AT4G36090.1 | oxidoreductase, 2OG-Fe(II) oxygenase family protein                                        |
| A_84_P10696  | 0.779882 | AT2G24160.1 | pseudogene, leucine rich repeat protein family                                             |
| A_84_P505118 | 0.780177 | AT4G37270.1 | HMA1 (Heavy metal ATPase 1); copper-exporting ATPase                                       |
| A_84_P556555 | 0.781347 | AT5G02490.1 | heat shock cognate 70 kDa protein 2 (HSC70-2) (HSP70-2)                                    |
| A_84_P824210 | 0.781421 | AT1G68580.2 | agenet domain-containing protein / bromo-adjacent homology (BAH) domain-containing protein |
| A_84_P519856 | 0.782774 | AT2G37390.1 | heavy-metal-associated domain-containing protein                                           |
| A_84_P11430  | 0.783303 | AT1G15250.1 | 60S ribosomal protein L37 (RPL37A)                                                         |
| A_84_P11645  | 0.785829 | AT2G38170.1 | CAX1 (CATION EXCHANGER 1)                                                                  |
| A_84_P23884  | 0.786103 | AT2G23130.1 | AGP17 (ARABINOGALACTAN PROTEIN 17)                                                         |
| A_84_P20725  | 0.786691 | AT5G63980.1 | SAL1 (FIERY1)                                                                              |
| A_84_P18073  | 0.787014 | AT1G55690.1 | SEC14 cytosolic factor family protein / phosphoglyceride transfer family protein           |
| A_84_P115922 | 0.787044 | AT4G26600.1 | nucleolar protein, putative                                                                |
| A_84_P21308  | 0.787251 | AT1G21550.1 | calcium-binding protein, putative                                                          |
| A_84_P22565  | 0.787439 | AT1G29690.1 | CAD1 (CONSTITUTIVELY ACTIVATED CELL DEATH 1)                                               |
| A_84_P20453  | 0.788532 | AT4G23540.1 | binding                                                                                    |
| A_84_P170813 | 0.78858  | AT1G74330.1 | ATP binding / protein kinase                                                               |
| A_84_P23069  | 0.789084 | AT3G17690.1 | ATCNGC19 (cyclic nucleotide gated channel 19)                                              |

|              |          |             |                                                                                    |
|--------------|----------|-------------|------------------------------------------------------------------------------------|
| A_84_P11951  | 0.789464 | AT4G25340.1 | immunophilin-related / FKBP-type peptidyl-prolyl cis-trans isomerase-related       |
| A_84_P19320  | 0.790382 | AT3G16510.1 | C2 domain-containing protein                                                       |
| A_84_P12506  | 0.790479 | AT2G31790.1 | UDP-glucuronosyl/UDP-glucosyl transferase family protein                           |
| A_84_P17304  | 0.790485 | AT2G40700.1 | DEAD/DEAH box helicase, putative (RH17)                                            |
| A_84_P12125  | 0.790791 | AT5G40340.1 | PWWP domain-containing protein                                                     |
| A_84_P13567  | 0.791014 | AT2G47130.1 | short-chain dehydrogenase/reductase (SDR) family protein                           |
| A_84_P13577  | 0.79113  | AT1G36940.1 | unknown protein                                                                    |
| A_84_P814936 | 0.791766 | AT4G30210.1 | ATR2 (ARABIDOPSIS P450 REDUCTASE 2)                                                |
| A_84_P19807  | 0.791791 | AT5G20480.1 | EFR (EF-TU RECEPTOR); ATP binding / kinase/ protein serine/threonine kinase        |
| A_84_P841184 | 0.791811 | AT3G27095.1 | pseudogene, hypothetical protein, similar to putative CHP-rich zinc finger protein |
| A_84_P11438  | 0.79182  | AT1G78000.1 | SULTR1;2 (SULFATE TRANSPORTER 1;2); sulfate transmembrane transporter              |
| A_84_P89559  | 0.792043 | AT5G66540.1 | similar to hypothetical protein OsI_036143 [Oryza sativa (indica cultivar-group)]  |
| A_84_P13372  | 0.793041 | AT1G69840.1 | band 7 family protein [AT1G69840.1]                                                |
| A_84_P11113  | 0.793839 | AT5G08620.1 | STRS2 (STRESS RESPONSE SUPPRESSOR 2)                                               |
| A_84_P14902  | 0.794704 | AT5G11670.1 | ATNADP-ME2 (NADP-MALIC ENZYME 2)                                                   |
| A_84_P12116  | 0.795123 | AT5G37980.1 | NADP-dependent oxidoreductase, putative                                            |
| A_84_P21796  | 0.795339 | AT1G10150.1 | ATPP2-A10 (Phloem protein 2-A10); carbohydrate binding                             |
| A_84_P12418  | 0.795378 | AT1G49530.1 | GGPS6 (GERANYLGERANYL PYROPHOSPHATE SYNTHASE 6); farnesyltransferase               |
| A_84_P103806 | 0.795606 | AT5G21940.1 | similar to unknown protein [Arabidopsis thaliana] (TAIR:AT3G43850.1)               |
| A_84_P20495  | 0.79563  | AT4G32800.1 | AP2 domain-containing transcription factor TINY, putative                          |
| A_84_P23970  | 0.796764 | AT2G46870.1 | NGA1 (NGATHA1); transcription factor                                               |
| A_84_P19651  | 0.796964 | AT5G19200.1 | short-chain dehydrogenase/reductase (SDR) family protein                           |
| A_84_P253585 | 0.797885 | AT3G26410.1 | methyltransferase/ nucleic acid binding                                            |
| A_84_P13779  | 0.798016 | AT4G03270.1 | CYCD6;1 (CYCLIN D6;1); cyclin-dependent protein kinase                             |
| A_84_P555359 | 0.798725 | AT3G02800.1 | phosphoprotein phosphatase                                                         |
| A_84_P120672 | 0.798773 | AT1G18620.1 | similar to unknown protein [Arabidopsis thaliana] (TAIR:AT1G74160.1)               |
| A_84_P15777  | 0.79885  | AT4G35420.1 | dihydroflavonol 4-reductase family / dihydrokaempferol 4-reductase family          |
| A_84_P20321  | 0.799071 | AT3G49120.1 | ATPCB/ATPERX34/PERX34/PRXCB (PEROXIDASE 34); peroxidase                            |
| A_84_P582979 | 0.79921  | AT3G15340.1 | PPI2 (PROTON PUMP INTERACTOR 2)                                                    |
| A_84_P597535 | 0.799504 | AT5G14090.1 | similar to hypothetical protein [Vitis vinifera] (GB:CAN72196.1)                   |
| A_84_P14505  | 0.799748 | AT2G32140.1 | transmembrane receptor ]                                                           |

|              |          |             |                                                                                   |
|--------------|----------|-------------|-----------------------------------------------------------------------------------|
| A_84_P11411  | 0.800026 | AT1G10490.1 | similar to unknown protein [Arabidopsis thaliana] (TAIR:AT3G57940.1)              |
| A_84_P11921  | 0.800099 | AT4G18010.1 | IP5PII (INOSITOL POLYPHOSPHATE 5-PHOSPHATASE II)                                  |
| A_84_P308743 | 0.800818 | AT5G23280.1 | TCP family transcription factor, putative                                         |
| A_84_P16010  | 0.801015 | AT5G67630.1 | DNA helicase, putative                                                            |
| A_84_P822593 | 0.801175 | AT5G57685.1 | ATGDU3 (ARABIDOPSIS THALIANA GLUTAMINE DUMPER 3)                                  |
| A_84_P21881  | 0.802111 | AT1G12100.1 | lipid binding                                                                     |
| A_84_P20047  | 0.802187 | AT1G31660.1 | similar to unknown [Populus trichocarpa] (GB:ABK93690.1)                          |
| A_84_P23752  | 0.802837 | AT1G63650.1 | EGL3 (ENHANCER OF GLABRA3); DNA binding / transcription factor                    |
| A_84_P11404  | 0.80353  | AT1G54820.1 | protein kinase family protein                                                     |
| A_84_P18925  | 0.803735 | AT1G61610.1 | S-locus lectin protein kinase family protein                                      |
| A_84_P547572 | 0.804471 | AT4G02360.1 | similar to unknown protein [Arabidopsis thaliana] (TAIR:AT1G02813.1)              |
| A_84_P585099 | 0.804831 | AT5G24200.1 | triacylglycerol lipase                                                            |
| A_84_P14689  | 0.804944 | AT3G58780.1 | SHP1 (SHATTERPROOF 1); DNA binding / transcription factor                         |
| A_84_P531238 | 0.80506  | AT1G61667.1 | similar to unknown protein [Arabidopsis thaliana] (TAIR:AT5G54530.1)              |
| A_84_P10774  | 0.805134 | AT1G26570.1 | ATUGD1/UGD1 (UDP-glucose dehydrogenase 1); UDP-glucose 6-dehydrogenase            |
| A_84_P133775 | 0.805262 | AT4G16563.1 | aspartyl protease family protein                                                  |
| A_84_P573880 | 0.805837 | AT1G79150.1 | binding                                                                           |
| A_84_P11771  | 0.806021 | AT3G22930.1 | calmodulin, putative                                                              |
| A_84_P764188 | 0.806615 | AT4G13120.1 | transposable element gene                                                         |
| A_84_P21494  | 0.807675 | AT5G02810.1 | PRR7 (PSEUDO-RESPONSE REGULATOR 7); transcription regulator                       |
| A_84_P16248  | 0.807775 | AT1G70920.1 | homeobox-leucine zipper protein, putative / HD-ZIP transcription factor, putative |
| A_84_P580265 | 0.80778  | AT3G07195.1 | proline-rich family protein                                                       |
| A_84_P869042 | 0.807866 | AT5G56010.1 | HSP81-3 (Heat shock protein 81-3); ATP binding                                    |
| A_84_P550382 | 0.807957 | AT5G10440.1 | CYCD4;2 (CYCLIN D4;2); cyclin-dependent protein kinase                            |
| A_84_P541841 | 0.808251 | AT1G51920.1 | unknown protein                                                                   |
| A_84_P10370  | 0.809194 | AT5G04230.1 | PAL3 (PHENYL ALANINE AMMONIA-LYASE 3)                                             |
| A_84_P271800 | 0.80926  | AT4G23170.1 | EP1; protein kinase                                                               |
| A_84_P250765 | 0.809971 | AT2G43120.1 | pirin, putative                                                                   |
| A_84_P94009  | 0.810187 | AT1G75120.1 | RRA1 (REDUCED RESIDUAL ARABINOSE 1)                                               |
| A_84_P754435 | 0.810201 | AT1G65486.1 | similar to unknown protein [Arabidopsis thaliana] (TAIR:AT1G65500.1)              |
| A_84_P824417 | 0.810245 | AT3G54000.1 | similar to unknown protein [Arabidopsis thaliana] (TAIR:AT5G59050.1)              |
| A_84_P10624  | 0.810658 | AT2G37130.1 | peroxidase 21 (PER21) (P21) (PRXR5)                                               |
| A_84_P766361 | 0.812742 | AT5G39740.1 | 60S ribosomal protein L5 (RPL5B)                                                  |
| A_84_P591591 | 0.814003 | AT1G31835.1 | unknown protein                                                                   |
| A_84_P18307  | 0.815455 | AT3G11650.1 | NHL2 (NDR1/HIN1-like 2)                                                           |

|              |          |             |                                                                                         |
|--------------|----------|-------------|-----------------------------------------------------------------------------------------|
| A_84_P14900  | 0.815713 | AT5G11240.1 | transducin family protein / WD-40 repeat family protein                                 |
| A_84_P268070 | 0.816378 | AT4G15070.1 | DC1 domain-containing protein                                                           |
| A_84_P19467  | 0.817838 | AT4G09510.1 | beta-fructofuranosidase                                                                 |
| A_84_P24159  | 0.818142 | AT3G61820.1 | aspartyl protease family protein                                                        |
| A_84_P763873 | 0.818675 | AT4G04293.1 | transposable element gene                                                               |
| A_84_P850940 | 0.818957 | AT1G08465.1 | YAB2 (YABBY 2); transcription factor                                                    |
| A_84_P278270 | 0.819679 | AT1G33170.1 | dehydration-responsive family protein                                                   |
| A_84_P757783 | 0.819696 | AT2G44798.1 | other RNA                                                                               |
| A_84_P16457  | 0.819706 | AT3G18130.1 | guanine nucleotide-binding family protein / activated protein kinase C receptor (RACK1) |
| A_84_P23529  | 0.821276 | AT5G55920.1 | nucleolar protein, putative                                                             |
| A_84_P10933  | 0.821891 | AT4G00700.1 | C2 domain-containing protein                                                            |
| A_84_P63150  | 0.822596 | AT5G53420.1 | similar to unknown protein [Arabidopsis thaliana] (TAIR:AT4G27900.1)                    |
| A_84_P11544  | 0.823051 | AT1G33590.1 | disease resistance protein-related / LRR protein-related                                |
| A_84_P137649 | 0.823556 | AT1G21250.1 | WAK1 (CELL WALL-ASSOCIATED KINASE); kinase                                              |
| A_84_P13549  | 0.823637 | AT2G39420.1 | esterase/lipase/thioesterase family protein                                             |
| A_84_P18881  | 0.823865 | AT5G37450.1 | leucine-rich repeat transmembrane protein kinase, putative                              |
| A_84_P14321  | 0.823939 | AT1G74440.1 | similar to unknown protein [Arabidopsis thaliana] (TAIR:AT1G18720.1)                    |
| A_84_P19235  | 0.824047 | AT2G44910.1 | homeobox-leucine zipper protein 4 (HB-4) / HD-ZIP protein 4                             |
| A_84_P11715  | 0.824221 | AT3G04290.1 | ATLTL1/LTL1 (LI-TOLERANT LIPASE 1); carboxylesterase                                    |
| A_84_P790617 | 0.82494  | AT2G37590.1 | Dof-type zinc finger domain-containing protein                                          |
| A_84_P16145  | 0.825913 | AT1G59960.1 | aldo/keto reductase, putative                                                           |
| A_84_P54930  | 0.826136 | AT1G01500.1 | similar to unknown protein [Arabidopsis thaliana] (TAIR:AT1G19400.1)                    |
| A_84_P21763  | 0.826405 | AT1G61580.1 | ARP2/RPL3B (ARABIDOPSIS RIBOSOMAL PROTEIN 2); structural constituent of ribosome        |
| A_84_P15294  | 0.827174 | AT1G17920.1 | HDG12 (HOMEODOMAIN GLABROUS12); transcription factor                                    |
| A_84_P15530  | 0.82794  | AT3G16810.1 | APUM24 (ARABIDOPSIS PUMILIO 24); RNA binding                                            |
| A_84_P17083  | 0.828168 | AT1G10540.1 | xanthine/uracil permease family protein                                                 |
| A_84_P19589  | 0.82992  | AT4G17460.1 | HAT1 (homeobox-leucine zipper protein 1); DNA binding / transcription factor            |
| A_84_P838518 | 0.829953 | AT1G50280.1 | phototropic-responsive NPH3 family protein                                              |
| A_84_P834930 | 0.830636 | AT5G38100.1 | methyltransferase-related                                                               |
| A_84_P503880 | 0.831202 | AT2G28820.1 | structural constituent of ribosome                                                      |
| A_84_P788405 | 0.831364 | AT1G36280.1 | adenylosuccinate lyase, putative / adenylosuccinase, putative                           |
| A_84_P12940  | 0.832395 | AT4G35180.1 | LHT7 (LYS/HIS TRANSPORTER 7); amino acid transmembrane transporter                      |
| A_84_P812231 | 0.833658 | AT1G03230.1 | extracellular dermal glycoprotein, putative / EDGP, putative                            |

|              |          |             |                                                                                            |
|--------------|----------|-------------|--------------------------------------------------------------------------------------------|
| A_84_P15820  | 0.8343   | AT5G03630.1 | ATMDAR2; monodehydroascorbate reductase (NADH)                                             |
| A_84_P763649 | 0.835726 | AT4G03926.1 | pseudogene, similar to Pectinesterase 3 precursor (EC 3.1.1.11)                            |
| A_84_P23480  | 0.836736 | AT5G42280.1 | DC1 domain-containing protein                                                              |
| A_84_P11521  | 0.838819 | AT1G58300.1 | HO4 (HEME OXYGENASE 4); heme oxygenase (decyclizing)/<br>oxidoreductase                    |
| A_84_P23405  | 0.83948  | AT5G08180.1 | ribosomal protein L7Ae/L30e/S12e/Gadd45 family protein                                     |
| A_84_P297384 | 0.839889 | AT4G31730.1 | GDU1 (GLUTAMINE DUMPER 1)                                                                  |
| A_84_P21746  | 0.841772 | AT1G17710.1 | phosphoric monoester hydrolase                                                             |
| A_84_P21962  | 0.841809 | AT2G31830.1 | endonuclease/exonuclease/phosphatase family protein                                        |
| A_84_P141979 | 0.842636 | AT5G65390.1 | AGP7 (Arabinogalactan protein 7)                                                           |
| A_84_P295534 | 0.843082 | AT5G54630.1 | zinc finger protein-related                                                                |
| A_84_P23778  | 0.843102 | AT1G29940.1 | NRPA2 (nuclear RNA polymerase A 2); DNA-directed RNA polymerase                            |
| A_84_P157075 | 0.845434 | AT5G58360.1 | ATOFP3/OFP3 (Arabidopsis thaliana ovate family protein 3)                                  |
| A_84_P16624  | 0.845636 | AT4G08250.1 | scarecrow transcription factor family protein                                              |
| A_84_P18069  | 0.845961 | AT1G49130.1 | zinc finger (B-box type) family protein                                                    |
| A_84_P523919 | 0.846131 | AT5G56230.1 | prenylated rab acceptor (PRA1) family protein                                              |
| A_84_P22252  | 0.846263 | AT3G57660.1 | NRPA1 (nuclear RNA polymerase A 1); DNA binding / DNA-directed RNA<br>polymerase           |
| A_84_P14940  | 0.847274 | AT5G27620.1 | CYCH;1 (CYCLIN H;1); cyclin-dependent protein kinase/ protein binding /<br>protein kinase  |
| A_84_P309633 | 0.847799 | AT3G05165.1 | sugar transporter, putative                                                                |
| A_84_P10318  | 0.850726 | AT5G62470.1 | MYB96 (myb domain protein 96); DNA binding / transcription factor                          |
| A_84_P15882  | 0.851078 | AT1G55800.1 | similar to ATP binding / nucleotide binding / phenylalanine-tRNA ligase                    |
| A_84_P760912 | 0.85114  | AT3G25225.1 | pseudogene, hypothetical protein                                                           |
| A_84_P237233 | 0.851838 | AT5G05190.1 | Identical to Uncharacterized protein At5g05190 (Y-1) [Arabidopsis<br>Thaliana] (GB:Q9FHK4) |
| A_84_P818463 | 0.852036 | AT5G67420.1 | LBD37 (LOB DOMAIN-CONTAINING PROTEIN 37)                                                   |
| A_84_P798815 | 0.85249  | AT4G39950.1 | CYP79B2 (cytochrome P450, family 79, subfamily B, polypeptide 2)                           |
| A_84_P114052 | 0.852599 | AT5G27030.1 | TPR3 (TOPLESS-RELATED 3)                                                                   |
| A_84_P20399  | 0.852614 | AT4G03400.1 | DFL2 (DWARF IN LIGHT 2)                                                                    |
| A_84_P808697 | 0.852797 | AT2G05100.1 | LHCB2.1 (Photosystem II light harvesting complex gene 2.1)                                 |
| A_84_P13496  | 0.853028 | AT2G25150.1 | transferase family protein                                                                 |
| A_84_P109302 | 0.853087 | AT1G19570.1 | DHAR1 (DEHYDROASCORBATE REDUCTASE); glutathione<br>dehydrogenase (ascorbate)               |
| A_84_P23806  | 0.853663 | AT1G13600.1 | ATBZIP58 (ARABIDOPSIS THALIANA BASIC LEUCINE-ZIPPER 58)                                    |
| A_84_P806954 | 0.853847 | AT1G48920.1 | ATNUC-L1/PARL1 (PARALLEL 1); nucleic acid binding                                          |
| A_84_P51580  | 0.854663 | AT1G72060.1 | serine-type endopeptidase inhibitor                                                        |

|              |          |             |                                                                         |
|--------------|----------|-------------|-------------------------------------------------------------------------|
| A_84_P21836  | 0.855462 | AT1G72940.1 | disease resistance protein (TIR-NBS class), putative                    |
| A_84_P804725 | 0.85647  | AT1G56110.1 | NOP56 (ARABIDOPSIS HOMOLOG OF NUCLEOLAR PROTEIN NOP56)                  |
| A_84_P823905 | 0.856505 | AT4G27860.1 | integral membrane family protein                                        |
| A_84_P757790 | 0.856814 | AT2G33815.1 | other RNA                                                               |
| A_84_P750624 | 0.857522 | AT1G11580.1 | ATPMEPCRA; pectinesterase                                               |
| A_84_P22745  | 0.857842 | AT1G03220.1 | extracellular dermal glycoprotein, putative / EDGP, putative            |
| A_84_P301260 | 0.85797  | AT1G74450.1 | similar to unknown protein [Arabidopsis thaliana] (TAIR:AT1G18740.1)    |
| A_84_P265480 | 0.858829 | AT2G36400.1 | AtGRF3 (GROWTH-REGULATING FACTOR 3) [AT2G36400.1]                       |
| A_84_P23208  | 0.859282 | AT3G60420.1 | similar to unknown protein [Arabidopsis thaliana] (TAIR:AT3G60450.1)    |
| A_84_P274410 | 0.859302 | AT1G68330.1 | similar to unknown protein [Arabidopsis thaliana] (TAIR:AT1G48780.1)    |
| A_84_P10363  | 0.859659 | AT1G28230.1 | PUP1 (PURINE PERMEASE 1); purine transmembrane transporter              |
| A_84_P24086  | 0.859717 | AT3G44610.1 | protein kinase family protein                                           |
| A_84_P22576  | 0.860202 | AT5G53950.1 | CUC2 (CUP-SHAPED COTYLEDON 2); transcription factor                     |
| A_84_P551808 | 0.860336 | AT3G01345.1 | Expressed protein                                                       |
| A_84_P196204 | 0.861224 | AT3G26040.1 | transferase family protein                                              |
| A_84_P22159  | 0.861402 | AT3G13100.1 | ATMRP7 (Arabidopsis thaliana multidrug resistance-associated protein 7) |
| A_84_P10735  | 0.863114 | AT3G05060.1 | SAR DNA-binding protein, putative                                       |
| A_84_P256460 | 0.863216 | AT2G22000.1 | PROPEP6 (Elicitor peptide 6 precursor)                                  |
| A_84_P13065  | 0.86336  | AT5G39080.1 | transferase family protein                                              |
| A_84_P17338  | 0.863449 | AT2G44740.1 | CYCP4;1 (cyclin p4;1); cyclin-dependent protein kinase                  |
| A_84_P206178 | 0.864127 | AT5G39420.1 | CDC2CAT (ARABIDOPSIS THALIANA CDC2C); kinase                            |
| A_84_P198204 | 0.865359 | AT2G17036.1 | F-box family protein                                                    |
| A_84_P583210 | 0.865559 | AT4G33550.1 | lipid binding                                                           |
| A_84_P229619 | 0.865843 | AT2G42320.1 | nucleolar protein gar2-related                                          |
| A_84_P20465  | 0.865948 | AT4G26090.1 | RPS2 (RESISTANT TO P. SYRINGAE 2)                                       |
| A_84_P544105 | 0.866003 | AT4G28405.1 | Expressed protein                                                       |
| A_84_P189284 | 0.866335 | AT2G30930.1 | similar to unknown protein [Arabidopsis thaliana] (TAIR:AT1G06540.1)    |
| A_84_P18821  | 0.866528 | AT5G61160.1 | AACT1 (ANTHOCYANIN 5-AROMATIC ACYLTRANSFERASE 1); transferase           |
| A_84_P853160 | 0.867929 | AT3G11820.1 | SYP121 (syntaxin 121); SNAP receptor                                    |
| A_84_P216618 | 0.868239 | AT5G35560.1 | DENN (AEX-3) domain-containing protein                                  |
| A_84_P21943  | 0.869736 | AT1G32170.1 | XTR4 (XYLOGLUCAN ENDOTRANSGLYCOSYLASE 4)                                |
| A_84_P16854  | 0.870408 | AT5G40920.1 | pseudogene, disease resistance protein (TIR-NBS-LRR class), putative    |
| A_84_P22053  | 0.871006 | AT2G41100.1 | TCH3 (TOUCH 3)                                                          |
| A_84_P20148  | 0.872168 | AT2G30870.1 | ATGSTF10 (EARLY DEHYDRATION-INDUCED 13)                                 |
| A_84_P224719 | 0.872591 | AT1G22250.1 | similar to unknown protein [Arabidopsis thaliana] (TAIR:AT1G78170.1)    |



|              |          |             |                                                                                         |
|--------------|----------|-------------|-----------------------------------------------------------------------------------------|
| A_84_P18043  | 0.873213 | AT1G16400.1 | CYP79F2 (cytochrome P450, family 79, subfamily F, polypeptide 2)                        |
| A_84_P785379 | 0.873245 | AT5G25350.1 | EBF2 (EIN3-BINDING F BOX PROTEIN 2)                                                     |
| A_84_P18839  | 0.873265 | AT5G65470.1 | similar to unknown protein [Arabidopsis thaliana] (TAIR:AT4G24530.1)                    |
| A_84_P22109  | 0.873524 | AT3G09720.1 | DEAD/DEAH box helicase, putative                                                        |
| A_84_P563385 | 0.87384  | AT3G16520.1 | UDP-glucuronosyl/UDP-glucosyl transferase family protein                                |
| A_84_P299450 | 0.874191 | AT2G43650.1 | EMB2777 (EMBRYO DEFECTIVE 2777)                                                         |
| A_84_P16974  | 0.874609 | AT5G20630.1 | GLP3 (GERMIN-LIKE PROTEIN 3)                                                            |
| A_84_P15340  | 0.874662 | AT2G06050.1 | OPR3 (OPDA-REDUCTASE 3); 12-oxophytodienoate reductase                                  |
| A_84_P54250  | 0.874698 | AT1G19960.1 | similar to transmembrane receptor [Arabidopsis thaliana] (TAIR:AT2G32140.1)             |
| A_84_P279970 | 0.874986 | AT5G23130.1 | peptidoglycan-binding LysM domain-containing protein                                    |
| A_84_P18449  | 0.87507  | AT1G06720.1 | similar to unknown protein [Arabidopsis thaliana] (TAIR:AT1G42440.1)                    |
| A_84_P844839 | 0.875755 | AT4G39030.1 | EDS5 (ENHANCED DISEASE SUSCEPTIBILITY 5); antiporter/transporter                        |
| A_84_P860280 | 0.876043 | AT1G69490.1 | NAP (NAC-LIKE, ACTIVATED BY AP3/PI); transcription factor                               |
| A_84_P852914 | 0.876097 | AT3G26420.1 | ATRZ-1A; RNA binding / nucleotide binding                                               |
| A_84_P768737 | 0.876135 | AT5G36002.1 | other RNA                                                                               |
| A_84_P14034  | 0.877584 | AT5G45750.1 | AtRABA1c (Arabidopsis Rab GTPase homolog A1c); GTP binding                              |
| A_84_P571830 | 0.878033 | AT5G65925.1 | similar to unknown protein [Arabidopsis thaliana] (TAIR:AT3G49820.1)                    |
| A_84_P21256  | 0.880957 | AT3G46490.1 | oxidoreductase, acting on paired donors                                                 |
| A_84_P763062 | 0.881534 | AT4G22710.1 | CYP706A2 (cytochrome P450, family 706, subfamily A, polypeptide 2); oxygen binding      |
| A_84_P538694 | 0.881868 | AT3G58770.1 | similar to hypothetical protein [Vitis vinifera] (GB:CAN63610.1)                        |
| A_84_P12406  | 0.883947 | AT1G50110.1 | branched-chain amino acid aminotransferase 6 / branched-chain amino acid transaminase 6 |
| A_84_P12638  | 0.884125 | AT3G08860.1 | alanine--glyoxylate aminotransferase, putative / beta-alanine-pyruvate aminotransferase |
| A_84_P23773  | 0.884371 | AT1G12220.1 | RPS5 (RESISTANT TO P. SYRINGAE 5)                                                       |
| A_84_P10102  | 0.885538 | AT4G34800.1 | auxin-responsive family protein                                                         |
| A_84_P19941  | 0.885818 | AT1G17060.1 | CYP72C1 (cytochrome P450, family 72, subfamily C, polypeptide 1)                        |
| A_84_P20175  | 0.886636 | AT2G01180.1 | ATPAP1 (PHOSPHATIDIC ACID PHOSPHATASE 1)                                                |
| A_84_P22854  | 0.887605 | AT1G51790.1 | kinase                                                                                  |
| A_84_P839763 | 0.887777 | AT1G31230.1 | AK-HSDH/AK-HSDH I (ASPARTATE KINASE-HOMOSERINE DEHYDROGENASE I)                         |
| A_84_P10171  | 0.889787 | AT5G10300.1 | hydrolase, alpha/beta fold family protein                                               |
| A_84_P12126  | 0.889794 | AT5G40540.1 | protein kinase, putative                                                                |
| A_84_P15205  | 0.89092  | AT1G16390.1 | ATOCT3 (ARABIDOPSIS THALIANA ORGANIC CATION/CARNITINE                                   |

|              |          |             |                                                                                         |
|--------------|----------|-------------|-----------------------------------------------------------------------------------------|
| A_84_P12343  | 0.891951 | AT1G03360.1 | TRANSPORTER2)                                                                           |
| A_84_P14556  | 0.89332  | AT3G15540.1 | ATTRP4; exonuclease                                                                     |
| A_84_P19458  | 0.893497 | AT4G04940.1 | IAA19 (indoleacetic acid-induced protein 19); transcription factor                      |
| A_84_P14955  | 0.893611 | AT5G39220.1 | transducin family protein / WD-40 repeat family protein                                 |
| A_84_P17428  | 0.895227 | AT3G16490.1 | hydrolase, alpha/beta fold family protein                                               |
| A_84_P10122  | 0.896283 | AT4G14040.1 | IQD26 (IQ-domain 26); calmodulin binding                                                |
| A_84_P21584  | 0.896501 | AT1G72210.1 | EDA38 (embryo sac development arrest 38); selenium binding                              |
| A_84_P15843  | 0.89651  | AT5G10550.1 | basic helix-loop-helix (bHLH) family protein (bHLH096)                                  |
|              |          |             | GTE2 (GLOBAL TRANSCRIPTION FACTOR GROUP E 2); DNA binding                               |
| A_84_P12242  | 0.897092 | AT5G20400.1 | oxidoreductase, 2OG-Fe(II) oxygenase family protein                                     |
| A_84_P23620  | 0.897695 | AT2G07675.1 | ribosomal protein S12 mitochondrial family protein                                      |
| A_84_P145729 | 0.897886 | AT2G36420.1 | similar to unknown protein [Arabidopsis thaliana] (TAIR:AT5G03670.1)                    |
| A_84_P832235 | 0.898308 | AT3G44870.1 | S-adenosyl-L-methionine:carboxyl methyltransferase family protein                       |
| A_84_P10686  | 0.898439 | AT2G17450.1 | RHA3A (RING-H2 finger A3A); protein binding / zinc ion binding                          |
| A_84_P846639 | 0.898527 | AT5G08780.1 | histone H1/H5 family protein                                                            |
| A_84_P183974 | 0.899184 | AT4G17480.1 | palmitoyl protein thioesterase family protein                                           |
| A_84_P13560  | 0.899906 | AT2G32150.1 | haloacid dehalogenase-like hydrolase family protein                                     |
| A_84_P18423  | 0.901671 | AT3G47480.1 | calcium-binding EF hand family protein                                                  |
| A_84_P829954 | 0.902177 | AT1G22330.1 | RNA binding                                                                             |
| A_84_P17137  | 0.902253 | AT1G71330.1 | ATNAP5 (Arabidopsis thaliana non-intrinsic ABC protein 5)                               |
| A_84_P307440 | 0.902802 | AT5G49665.1 | zinc finger (C3HC4-type RING finger) family protein                                     |
| A_84_P14426  | 0.903803 | AT2G23300.1 | leucine-rich repeat transmembrane protein kinase, putative                              |
| A_84_P169053 | 0.904266 | AT3G45730.1 | unknown protein                                                                         |
| A_84_P21890  | 0.904476 | AT1G70740.1 | protein kinase family protein                                                           |
| A_84_P198744 | 0.905919 | AT5G07790.1 | similar to unknown protein [Arabidopsis thaliana] (TAIR:AT5G61300.1)                    |
| A_84_P786210 | 0.906367 | AT4G31550.2 | WRKY11 (WRKY DNA-binding protein 11); transcription factor                              |
| A_84_P587454 | 0.906713 | AT3G19850.1 | phototropic-responsive NPH3 family protein                                              |
| A_84_P23436  | 0.907766 | AT5G22500.1 | acyl CoA reductase, putative / male-sterility protein, putative                         |
| A_84_P311583 | 0.907835 | AT5G42445.1 | 60S ribosomal protein L3 (RPL3C), pseudogene, temporary automated functional assignment |
| A_84_P152828 | 0.908755 | AT2G35470.1 | similar to unknown [Populus trichocarpa] (GB:ABK94143.1)                                |
| A_84_P19627  | 0.909618 | AT5G10510.1 | AIL6 (AINTEGUMENTA-LIKE 6); DNA binding / transcription factor                          |
| A_84_P589129 | 0.91006  | AT2G40095.1 | similar to unknown protein [Arabidopsis thaliana] (TAIR:AT3G55880.2)                    |
| A_84_P78669  | 0.910074 | AT5G03120.1 | similar to hypothetical protein [Vitis vinifera] (GB:CAN68657.1)                        |
| A_84_P592126 | 0.910395 | AT4G32810.1 | CCD8 (CAROTENOID CLEAVAGE DIOXYGENASE 8)                                                |
| A_84_P21415  | 0.910722 | AT4G26890.1 | MAPKKK16 (Mitogen-activated protein kinase kinase kinase 16); kinase                    |

|              |          |             |                                                                                |
|--------------|----------|-------------|--------------------------------------------------------------------------------|
| A_84_P14389  | 0.911984 | AT2G19670.1 | protein arginine N-methyltransferase, putative                                 |
| A_84_P762532 | 0.912276 | AT3G51238.1 | other RNA                                                                      |
| A_84_P847323 | 0.912311 | AT2G18210.1 | similar to unknown protein [Arabidopsis thaliana] (TAIR:AT4G36500.1)           |
| A_84_P822050 | 0.912633 | AT3G23080.1 | similar to unknown protein [Arabidopsis thaliana] (TAIR:AT4G14500.1)           |
| A_84_P759661 | 0.914787 | AT3G27500.1 | protein binding / zinc ion binding                                             |
| A_84_P174151 | 0.914892 | AT2G40330.1 | Bet v I allergen family protein                                                |
| A_84_P16510  | 0.915738 | AT1G35710.1 | leucine-rich repeat transmembrane protein kinase, putative                     |
| A_84_P10341  | 0.91677  | AT5G15550.1 | transducin family protein / WD-40 repeat family protein                        |
| A_84_P819884 | 0.916793 | AT4G38550.1 | similar to unknown protein [Arabidopsis thaliana] (TAIR:AT2G20950.1)           |
| A_84_P19047  | 0.918089 | AT1G74100.1 | sulfotransferase family protein                                                |
| A_84_P824802 | 0.918328 | AT2G44370.1 | DC1 domain-containing protein                                                  |
| A_84_P78019  | 0.918928 | AT1G72430.1 | auxin-responsive protein-related                                               |
| A_84_P19135  | 0.919017 | AT2G28630.1 | beta-ketoacyl-CoA synthase family protein                                      |
| A_84_P810579 | 0.919989 | AT4G30270.1 | MER15B (MERISTEM-5)                                                            |
| A_84_P18500  | 0.92033  | AT4G01700.1 | chitinase, putative                                                            |
| A_84_P765172 | 0.921117 | AT4G03038.1 | other RNA                                                                      |
| A_84_P561511 | 0.922071 | AT2G36540.1 | NLI interacting factor (NIF) family protein                                    |
| A_84_P504929 | 0.922221 | AT3G29000.1 | calcium-binding EF hand family protein                                         |
| A_84_P21462  | 0.922636 | AT4G38560.1 | similar to pEARLI4 [Arabidopsis thaliana] (TAIR:AT2G20960.1)                   |
| A_84_P793055 | 0.922737 | AT4G30440.1 | GAE1 (UDP-D-GLUCURONATE 4-EPIMERASE 1); UDP-glucuronate 4-epimerase/ catalytic |
| A_84_P557080 | 0.923336 | AT2G32650.2 | similar to PTAC18 (PLASTID TRANSCRIPTIONALLY ACTIVE18) [Arabidopsis thaliana]  |
| A_84_P17994  | 0.92417  | AT1G23030.1 | armadillo/beta-catenin repeat family protein / U-box domain-containing protein |
| A_84_P18933  | 0.924246 | AT1G24170.1 | GATL8/LGT9 (Galacturonosyltransferase-like 8)                                  |
| A_84_P18008  | 0.924499 | AT1G10110.1 | F-box family protein                                                           |
| A_84_P134385 | 0.924526 | AT2G01910.1 | ATMAP65-6; microtubule binding                                                 |
| A_84_P806987 | 0.925211 | AT5G54270.1 | LHCB3 (LIGHT-HARVESTING CHLOROPHYLL BINDING PROTEIN 3)                         |
| A_84_P257040 | 0.925766 | AT4G16860.1 | RPP4 (RECOGNITION OF PERONOSPORA PARASITICA 4)                                 |
| A_84_P12139  | 0.925929 | AT5G44400.1 | FAD-binding domain-containing protein                                          |
| A_84_P757124 | 0.926231 | AT2G31751.1 | unknown protein                                                                |
| A_84_P241903 | 0.926725 | AT5G50200.1 | WR3 (WOUND-RESPONSIVE 3); nitrate transmembrane transporter                    |
| A_84_P15800  | 0.92761  | AT4G15920.1 | nodulin MtN3 family protein                                                    |
| A_84_P847471 | 0.928132 | AT1G33720.1 | CYP76C6 (cytochrome P450, family 76, subfamily C, polypeptide 6)               |
| A_84_P12954  | 0.928859 | AT4G39210.1 | APL3 (large subunit of AGP 3)                                                  |

|              |          |             |                                                                                   |
|--------------|----------|-------------|-----------------------------------------------------------------------------------|
| A_84_P17424  | 0.929946 | AT3G14470.1 | disease resistance protein (NBS-LRR class), putative                              |
| A_84_P16706  | 0.930184 | AT4G31500.1 | CYP83B1 (CYTOCHROME P450 MONOOXYGENASE 83B1)                                      |
| A_84_P14934  | 0.931092 | AT1G01120.1 | KCS1 (3-KETOACYL-COA SYNTHASE 1); acyltransferase                                 |
| A_84_P23712  | 0.932189 | AT1G59860.1 | 17.6 kDa class I heat shock protein (HSP17.6A-CI)                                 |
| A_84_P21393  | 0.933521 | AT1G27030.1 | similar to unknown protein [Arabidopsis thaliana] (TAIR:AT1G27020.1)              |
| A_84_P12944  | 0.935256 | AT4G36110.1 | auxin-responsive protein, putative                                                |
| A_84_P21302  | 0.935409 | AT3G56660.1 | BZIP49; DNA binding / transcription factor                                        |
| A_84_P21770  | 0.936042 | AT1G23060.1 | similar to unknown protein [Arabidopsis thaliana] (TAIR:AT1G70950.1)              |
| A_84_P21488  | 0.936371 | AT5G01500.1 | mitochondrial substrate carrier family protein                                    |
| A_84_P254390 | 0.939969 | AT2G30990.1 | similar to unknown protein [Arabidopsis thaliana] (TAIR:AT1G29240.1)              |
| A_84_P22126  | 0.940036 | AT3G23410.1 | alcohol oxidase-related [AT3G23410.1]                                             |
| A_84_P17047  | 0.941459 | AT1G80730.1 | ZFP1 (ARABIDOPSIS THALIANA ZINC-FINGER PROTEIN 1)                                 |
| A_84_P23475  | 0.942007 | AT1G72180.1 | leucine-rich repeat transmembrane protein kinase, putative                        |
| A_84_P787353 | 0.942051 | AT5G17350.1 | similar to unknown protein [Arabidopsis thaliana] (TAIR:AT3G03280.1)              |
| A_84_P751456 | 0.942711 | AT1G30310.1 | transposable element gene                                                         |
| A_84_P20977  | 0.943208 | AT1G14480.1 | protein binding                                                                   |
| A_84_P834883 | 0.943854 | AT4G00160.1 | F-box family protein                                                              |
| A_84_P19551  | 0.944869 | AT4G33300.1 | ADR1-L1 (ADR1-LIKE 1); ATP binding / protein binding                              |
| A_84_P17485  | 0.944977 | AT3G49530.1 | ANAC062 (Arabidopsis NAC domain containing protein 62)                            |
| A_84_P23846  | 0.945512 | AT2G47180.1 | ATGOLS1 (ARABIDOPSIS THALIANA GALACTINOL SYNTHASE 1)                              |
| A_84_P837686 | 0.945566 | AT1G49390.1 | oxidoreductase, 2OG-Fe(II) oxygenase family protein                               |
| A_84_P51550  | 0.945708 | AT2G40750.1 | WRKY54 (WRKY DNA-binding protein 54); transcription factor                        |
| A_84_P786936 | 0.94589  | AT2G42300.1 | basic helix-loop-helix (bHLH) family protein                                      |
| A_84_P550871 | 0.946003 | AT2G33750.1 | ATPUP2 (Arabidopsis thaliana purine permease 2); purine transmembrane transporter |
| A_84_P13700  | 0.946065 | AT3G48790.1 | serine C-palmitoyltransferase, putative                                           |
| A_84_P12310  | 0.947824 | AT1G76960.1 | unknown protein                                                                   |
| A_84_P16057  | 0.948725 | AT1G45145.1 | ATTRX5 (thioredoxin H-type 5); thiol-disulfide exchange intermediate              |
| A_84_P752140 | 0.949118 | AT1G68585.1 | metal ion binding                                                                 |
| A_84_P22058  | 0.949165 | AT2G39180.1 | protein kinase family protein                                                     |
| A_84_P19231  | 0.950633 | AT2G26150.1 | ATHSFA2 (Arabidopsis thaliana heat shock transcription factor A2)                 |
| A_84_P565934 | 0.952256 | AT2G34010.1 | similar to unknown protein [Arabidopsis thaliana] (TAIR:AT1G29010.1)              |
| A_84_P19093  | 0.952474 | AT1G78490.1 | CYP708A3 (cytochrome P450, family 708, subfamily A, polypeptide 3)                |
| A_84_P14837  | 0.95542  | AT4G37750.1 | ANT (AINTEGUMENTA); DNA binding / transcription factor                            |
| A_84_P14376  | 0.955888 | AT1G58440.1 | XF1 (SQUALENE EPOXIDASE 1); oxidoreductase                                        |
| A_84_P592665 | 0.956729 | AT2G24762.1 | ATGDU4 (ARABIDOPSIS THALIANA GLUTAMINE DUMPER 4)                                  |
| A_84_P98726  | 0.957354 | AT2G34620.1 | mitochondrial transcription termination factor-related / mTERF-related            |

|              |          |             |                                                                                |
|--------------|----------|-------------|--------------------------------------------------------------------------------|
| A_84_P15324  | 0.957523 | AT1G33560.1 | ADR1 (ACTIVATED DISEASE RESISTANCE 1)                                          |
| A_84_P10200  | 0.958353 | AT5G23360.1 | GRAM domain-containing protein / ABA-responsive protein-related                |
| A_84_P860087 | 0.959587 | AT1G27020.1 | similar to unknown protein [Arabidopsis thaliana] (TAIR:AT1G27030.1)           |
| A_84_P310313 | 0.960062 | AT2G26190.1 | calmodulin-binding family protein                                              |
| A_84_P786552 | 0.960139 | AT2G20870.1 | cell wall protein precursor, putative                                          |
| A_84_P262040 | 0.960476 | AT2G42580.1 | TTL3 (TETRATRICOPETIDE-REPEAT THIOREDOXIN-LIKE 3); protein binding             |
| A_84_P588688 | 0.960691 | AT5G46500.1 | similar to disease resistance protein (TIR-NBS-LRR class), putative            |
| A_84_P22414  | 0.962201 | AT4G39980.1 | DHS1 (3-DEOXY-D-ARABINO-HEPTULOSONATE 7-PHOSPHATE SYNTHASE 1)                  |
| A_84_P216248 | 0.964272 | AT1G69890.1 | similar to unknown protein [Arabidopsis thaliana] (TAIR:AT1G27100.1)           |
| A_84_P17532  | 0.965992 | AT3G60320.1 | DNA binding [AT3G60320.1]                                                      |
| A_84_P11000  | 0.966022 | AT4G24010.1 | ATCSLG1 (Cellulose synthase-like G1)                                           |
| A_84_P519833 | 0.966431 | AT2G30520.1 | RPT2 (ROOT PHOTOTROPISM 2); protein binding                                    |
| A_84_P278230 | 0.967642 | AT3G14090.1 | ATEXO70D3 (exocyst subunit EXO70 family protein D3); protein binding           |
| A_84_P765568 | 0.967953 | AT4G13493.1 | MIR850a; miRNA                                                                 |
| A_84_P222519 | 0.96872  | AT1G21130.1 | O-methyltransferase, putative                                                  |
| A_84_P15467  | 0.969215 | AT3G01290.1 | band 7 family protein                                                          |
| A_84_P23593  | 0.969695 | AT5G08350.1 | GRAM domain-containing protein / ABA-responsive protein-related                |
| A_84_P800742 | 0.972771 | AT2G25900.1 | ATCTH (Arabidopsis thaliana Cys3His zinc finger protein); transcription factor |
| A_84_P860907 | 0.973757 | AT3G62420.1 | ATBZIP53 (BASIC REGION/LEUCINE ZIPPER MOTIF 53)                                |
| A_84_P533968 | 0.974784 | AT2G02540.1 | ATHB21/ZFHD4 (ZINC FINGER HOMEODOMAIN 4); DNA binding / transcription factor   |
| A_84_P11195  | 0.975923 | AT5G44680.1 | methyladenine glycosylase family protein                                       |
| A_84_P764482 | 0.979328 | AT4G34090.1 | similar to unknown protein [Arabidopsis thaliana] (TAIR:AT2G23370.1)           |
| A_84_P10445  | 0.980086 | AT1G10020.1 | similar to unknown protein [Arabidopsis thaliana] (TAIR:AT4G29310.1)           |
| A_84_P17294  | 0.980477 | AT2G20960.1 | pEARLI4                                                                        |
| A_84_P235393 | 0.980522 | AT2G01930.1 | ATBPC1/BBR/BPC1/BPC1 (BASIC PENTACYSTEINE1)                                    |
| A_84_P20792  | 0.981    | AT1G15670.1 | kelch repeat-containing F-box family protein                                   |
| A_84_P812910 | 0.982023 | AT3G22235.1 | unknown protein                                                                |
| A_84_P52340  | 0.982891 | AT3G26840.1 | esterase/lipase/thioesterase family protein                                    |
| A_84_P544019 | 0.983384 | AT4G00970.1 | protein kinase family protein                                                  |
| A_84_P764568 | 0.983783 | AT4G25845.1 | unknown protein                                                                |
| A_84_P21248  | 0.984594 | AT3G44560.1 | oxidoreductase, acting on the CH-CH group of donors                            |
| A_84_P10236  | 0.985971 | AT5G40780.1 | LHT1 (LYSINE HISTIDINE TRANSPORTER 1); amino acid transmembrane transporter    |

|              |          |             |                                                                                            |
|--------------|----------|-------------|--------------------------------------------------------------------------------------------|
| A_84_P265400 | 0.986096 | AT2G31110.1 | similar to unknown protein [Arabidopsis thaliana] (TAIR:AT2G42570.1)                       |
| A_84_P847580 | 0.986415 | AT1G21100.1 | O-methyltransferase, putative                                                              |
| A_84_P197114 | 0.986807 | AT3G28180.1 | ATCSLC04 (CELLULOSE-SYNTHASE LIKE C 4); transferase, transferring glycosyl groups          |
| A_84_P573310 | 0.988501 | AT4G01330.1 | protein kinase family protein                                                              |
| A_84_P22650  | 0.988801 | AT5G20740.1 | invertase/pectin methylesterase inhibitor family protein                                   |
| A_84_P265920 | 0.989121 | AT3G18980.1 | F-box family protein                                                                       |
| A_84_P827867 | 0.990057 | AT1G65880.1 | BZO1; benzoate-CoA ligase                                                                  |
| A_84_P261290 | 0.990449 | AT1G31540.1 | disease resistance protein (TIR-NBS-LRR class), putative                                   |
| A_84_P582597 | 0.990904 | AT1G09932.1 | phosphoglycerate/bisphosphoglycerate mutase-related                                        |
| A_84_P177804 | 0.991104 | AT3G54460.1 | SNF2 domain-containing protein / helicase domain-containing protein / F-box family protein |
| A_84_P23237  | 0.991302 | AT4G03450.1 | ankyrin repeat family protein                                                              |
| A_84_P592024 | 0.993292 | AT3G63430.1 | similar to unknown protein [Arabidopsis thaliana] (TAIR:AT1G18620.2)                       |
| A_84_P17207  | 0.993439 | AT1G57590.1 | carboxylesterase                                                                           |
| A_84_P21473  | 0.99515  | AT4G15210.1 | ATBETA-AMY (BETA-AMYLASE); beta-amylase                                                    |
| A_84_P587896 | 0.997027 | AT1G05420.1 | ATOFP12/OFP12 (Arabidopsis thaliana ovate family protein 12)                               |
| A_84_P556737 | 0.997629 | AT5G65207.1 | similar to unknown protein [Arabidopsis thaliana] (TAIR:AT5G10040.1)                       |
| A_84_P18553  | 0.998109 | AT4G21390.1 | B120; protein kinase/ sugar binding                                                        |
| A_84_P818351 | 0.998383 | AT3G16720.1 | ATL2 (Arabidopsis T <sup>?</sup> xicos en Levadura 2); protein binding / zinc ion binding  |
| A_84_P817886 | 0.99889  | AT2G18730.1 | diacylglycerol kinase, putative                                                            |
| A_84_P586644 | 0.999278 | AT3G53232.1 | DVL20/RTFL1 (ROTUNDIFOLIA 1)                                                               |
| A_84_P148358 | 0.999632 | AT3G62630.1 | similar to calmodulin-binding protein [Arabidopsis thaliana] (TAIR:AT2G15760.1)            |
| A_84_P18191  | 0.999756 | AT2G16870.1 | disease resistance protein (TIR-NBS-LRR class), putative [AT2G16870.1]                     |
| A_84_P608304 | 1.000402 | AT5G54710.1 | ankyrin repeat family protein                                                              |
| A_84_P12738  | 1.000523 | AT1G02660.1 | lipase class 3 family protein                                                              |
| A_84_P20449  | 1.001251 | AT4G22490.1 | protease inhibitor/seed storage/lipid transfer protein (LTP) family protein                |
| A_84_P22149  | 1.001442 | AT3G13310.1 | DNAJ heat shock N-terminal domain-containing protein                                       |
| A_84_P87399  | 1.003204 | AT3G06520.1 | agenet domain-containing protein                                                           |
| A_84_P813990 | 1.004978 | AT4G30530.1 | defense-related protein, putative                                                          |
| A_84_P155535 | 1.00557  | AT5G56100.1 | glycine-rich protein / oleosin                                                             |
| A_84_P868161 | 1.005813 | AT1G14200.1 | zinc finger (C3HC4-type RING finger) family protein                                        |
| A_84_P11932  | 1.006197 | AT1G29160.1 | Dof-type zinc finger domain-containing protein                                             |
| A_84_P11217  | 1.006864 | AT5G50260.1 | cysteine proteinase, putative                                                              |
| A_84_P144519 | 1.007842 | AT2G03260.1 | EXS family protein / ERD1/XPR1/SYG1 family protein                                         |

|              |          |             |                                                                                            |
|--------------|----------|-------------|--------------------------------------------------------------------------------------------|
| A_84_P767270 | 1.008539 | AT5G20240.1 | PI (PISTILLATA); DNA binding / transcription factor                                        |
| A_84_P53790  | 1.008556 | AT1G49500.1 | similar to unknown protein [Arabidopsis thaliana] (TAIR:AT3G19030.1)                       |
| A_84_P11760  | 1.009272 | AT3G24340.1 | CHR40 (chromatin remodeling 40); ATP binding / DNA binding / helicase                      |
| A_84_P12978  | 1.009596 | AT5G01810.1 | CIPK15 (CBL-INTERACTING PROTEIN KINASE 15); kinase/ protein kinase                         |
| A_84_P766473 | 1.010251 | AT5G25260.1 | similar to unknown protein [Arabidopsis thaliana] (TAIR:AT5G25250.1)                       |
| A_84_P19210  | 1.010396 | AT2G46400.1 | WRKY46 (WRKY DNA-binding protein 46); transcription factor                                 |
| A_84_P233559 | 1.01088  | AT1G10340.1 | ankyrin repeat family protein                                                              |
| A_84_P822423 | 1.010881 | AT1G27210.1 | binding                                                                                    |
| A_84_P22112  | 1.011986 | AT1G53070.1 | legume lectin family protein                                                               |
| A_84_P754667 | 1.012126 | AT1G31485.1 | other RNA                                                                                  |
| A_84_P760741 | 1.013078 | AT3G11010.1 | disease resistance family protein / LRR family protein                                     |
| A_84_P16522  | 1.013383 | AT3G45640.1 | ATMPK3 (MITOGEN-ACTIVATED PROTEIN KINASE 3); MAP kinase/ kinase/ protein kinase            |
| A_84_P191974 | 1.013509 | AT5G03210.1 | unknown protein                                                                            |
| A_84_P18141  | 1.013659 | AT1G55450.1 | embryo-abundant protein-related                                                            |
| A_84_P17332  | 1.014691 | AT2G01850.1 | EXGT-A3 (endo-xyloglucan transferase A3)                                                   |
| A_84_P14705  | 1.015337 | AT3G62780.1 | C2 domain-containing protein                                                               |
| A_84_P157715 | 1.015364 | AT1G72930.1 | TIR (TOLL/INTERLEUKIN-1 RECEPTOR-LIKE); transmembrane receptor                             |
| A_84_P860518 | 1.015471 | AT1G69710.1 | zinc finger protein, putative / regulator of chromosome condensation (RCC1) family protein |
| A_84_P194204 | 1.015961 | AT4G33666.1 | unknown protein                                                                            |
| A_84_P761727 | 1.017271 | AT3G13437.1 | unknown protein                                                                            |
| A_84_P11318  | 1.018235 | AT1G35310.1 | MLP168 (MLP-LIKE PROTEIN 168)                                                              |
| A_84_P83349  | 1.018372 | AT1G26800.1 | zinc finger (C3HC4-type RING finger) family protein                                        |
| A_84_P16626  | 1.019404 | AT4G08770.1 | peroxidase, putative                                                                       |
| A_84_P835261 | 1.019924 | AT2G21850.1 | protein binding / zinc ion binding                                                         |
| A_84_P243265 | 1.020969 | AT1G67900.1 | phototropic-responsive NPH3 family protein                                                 |
| A_84_P17770  | 1.021751 | AT5G25310.1 | exostosin family protein                                                                   |
| A_84_P17803  | 1.022506 | AT1G72280.1 | AERO1 (ARABIDOPSIS ENDOPLASMIC RETICULUM OXIDOREDUCTINS 1)                                 |
| A_84_P18673  | 1.023258 | AT5G07690.1 | MYB29 (myb domain protein 29); DNA binding / transcription factor                          |
| A_84_P721757 | 1.023304 | AT5G61412.1 | unknown protein                                                                            |
| A_84_P549066 | 1.024752 | AT2G20250.1 | unknown protein                                                                            |
| A_84_P14129  | 1.02547  | AT5G20960.1 | AAO1 (ALDEHYDE OXIDASE 1)                                                                  |
| A_84_P110112 | 1.026369 | AT5G09980.1 | PROPEP4 (Elicitor peptide 4 precursor)                                                     |

|              |          |             |                                                                                            |
|--------------|----------|-------------|--------------------------------------------------------------------------------------------|
| A_84_P10050  | 1.026912 | AT4G23060.1 | IQD22 (IQ-domain 22); calmodulin binding                                                   |
| A_84_P139169 | 1.029174 | AT1G67810.1 | Fe-S metabolism associated domain-containing protein                                       |
| A_84_P763076 | 1.029185 | AT4G23420.1 | short-chain dehydrogenase/reductase (SDR) family protein                                   |
| A_84_P21219  | 1.030009 | AT3G19580.1 | AZF2 (ARABIDOPSIS ZINC-FINGER PROTEIN 2)                                                   |
| A_84_P504670 | 1.030548 | AT1G73810.1 | DNA binding                                                                                |
| A_84_P215028 | 1.030664 | AT3G25770.1 | AOC2 (ALLENE OXIDE CYCLASE 2)                                                              |
| A_84_P14776  | 1.031325 | AT4G23180.1 | CRK10 (CYSTEINE-RICH RLK10); kinase                                                        |
| A_84_P503876 | 1.031907 | AT2G27660.1 | DC1 domain-containing protein                                                              |
| A_84_P15331  | 1.032513 | AT2G43620.1 | chitinase, putative                                                                        |
| A_84_P20145  | 1.033186 | AT2G18650.1 | MEE16 (maternal effect embryo arrest 16); protein binding / zinc ion binding               |
| A_84_P22453  | 1.034061 | AT1G06540.1 | similar to unknown protein [Arabidopsis thaliana] (TAIR:AT2G30930.1)                       |
| A_84_P515865 | 1.034635 | AT5G26690.1 | heavy-metal-associated domain-containing protein [AT5G26690.1]                             |
| A_84_P800959 | 1.034767 | AT4G15160.1 | protease inhibitor/seed storage/lipid transfer protein (LTP) family protein                |
| A_84_P21252  | 1.037054 | AT3G45680.1 | proton-dependent oligopeptide transport (POT) family protein                               |
| A_84_P754621 | 1.038218 | AT1G17147.1 | similar to VQ motif-containing protein [Arabidopsis thaliana] (TAIR:AT1G78410.1)           |
| A_84_P23505  | 1.038383 | AT5G48880.1 | KAT5/PKT1/PKT2                                                                             |
| A_84_P13104  | 1.038905 | AT5G49520.1 | WRKY48 (WRKY DNA-binding protein 48); transcription factor                                 |
| A_84_P21049  | 1.040261 | AT2G26560.1 | PLP2 (PHOSPHOLIPASE A 2A); nutrient reservoir                                              |
| A_84_P767749 | 1.042523 | AT5G39970.1 | catalytic                                                                                  |
| A_84_P18072  | 1.043589 | AT1G72520.1 | lipoxygenase, putative                                                                     |
| A_84_P869207 | 1.044592 | AT1G23390.1 | kelch repeat-containing F-box family protein                                               |
| A_84_P607017 | 1.046246 | AT3G13175.1 | similar to unnamed protein product [Vitis vinifera] (GB:CAO45116.1)                        |
| A_84_P210718 | 1.046816 | AT3G60200.1 | similar to unknown protein [Arabidopsis thaliana] (TAIR:AT2G44600.1)                       |
| A_84_P11762  | 1.04712  | AT3G28910.1 | MYB30 (myb domain protein 30); DNA binding / transcription factor                          |
| A_84_P128906 | 1.047147 | AT2G15390.1 | FUT4 (fucosyltransferase 4); fucosyltransferase/ transferase, transferring glycosyl groups |
| A_84_P831845 | 1.04747  | AT1G61100.1 | disease resistance protein (TIR class), putative                                           |
| A_84_P862538 | 1.047496 | AT5G20010.1 | RAN-1 (RAS RELATED NUCLEAR PROTEIN); GTP binding                                           |
| A_84_P853555 | 1.048052 | AT1G18020.1 | 12-oxophytodienoate reductase, putative                                                    |
| A_84_P789443 | 1.048544 | AT3G55880.1 | similar to unknown protein [Arabidopsis thaliana] (TAIR:AT2G40095.1)                       |
| A_84_P98956  | 1.048701 | AT5G42200.1 | zinc finger (C3HC4-type RING finger) family protein                                        |
| A_84_P250505 | 1.049846 | AT5G46780.1 | VQ motif-containing protein                                                                |
| A_84_P175111 | 1.051402 | AT3G06530.1 | BAP28-related                                                                              |
| A_84_P13709  | 1.052356 | AT3G50770.1 | calmodulin-related protein, putative                                                       |
| A_84_P22615  | 1.053197 | AT1G55200.1 | protein kinase family protein                                                              |



|              |          |             |                                                                                     |
|--------------|----------|-------------|-------------------------------------------------------------------------------------|
| A_84_P10811  | 1.055327 | AT3G16420.1 | PBP1 (PYK10-BINDING PROTEIN 1)                                                      |
| A_84_P758455 | 1.055726 | AT2G07042.1 | other RNA                                                                           |
| A_84_P825674 | 1.058244 | AT4G08930.1 | ATAPRL6 (APR-LIKE 6)                                                                |
| A_84_P800757 | 1.058476 | AT5G64260.1 | phosphate-responsive protein, putative                                              |
| A_84_P835962 | 1.058873 | AT4G19520.1 | disease resistance protein (TIR-NBS-LRR class), putative                            |
| A_84_P19559  | 1.059797 | AT1G15010.1 | similar to unknown protein [Arabidopsis thaliana] (TAIR:AT2G01300.1)                |
| A_84_P17584  | 1.06044  | AT1G17380.1 | JAZ5/TIFY11A (JASMONATE-ZIM-DOMAIN PROTEIN 5)                                       |
| A_84_P825802 | 1.060842 | AT5G25250.1 | similar to unknown protein [Arabidopsis thaliana] (TAIR:AT5G64870.1)                |
| A_84_P79415  | 1.063441 | AT2G18300.1 | basic helix-loop-helix (bHLH) family protein                                        |
| A_84_P18998  | 1.063685 | AT1G72900.1 | disease resistance protein (TIR-NBS class), putative                                |
| A_84_P513250 | 1.064216 | AT5G54145.1 | similar to unknown protein [Arabidopsis thaliana] (TAIR:AT4G27657.1)                |
| A_84_P599301 | 1.065625 | AT5G06470.1 | glutaredoxin family protein                                                         |
| A_84_P13089  | 1.065994 | AT5G45730.1 | DC1 domain-containing protein                                                       |
| A_84_P12178  | 1.066968 | AT1G56120.1 | leucine-rich repeat family protein / protein kinase family protein                  |
| A_84_P217918 | 1.070242 | AT1G71970.1 | similar to unknown protein [Arabidopsis thaliana] (TAIR:AT1G22680.1)                |
| A_84_P798884 | 1.070782 | AT4G34750.1 | auxin-responsive protein, putative / small auxin up RNA (SAUR_E)                    |
| A_84_P704033 | 1.071472 | AT1G11185.1 | other RNA                                                                           |
| A_84_P12103  | 1.072013 | AT5G27120.1 | SAR DNA-binding protein, putative                                                   |
| A_84_P17043  | 1.072239 | AT1G24150.1 | ATFH4/FH4 (FORMIN HOMOLOGUE 4); actin binding / protein binding                     |
| A_84_P161533 | 1.072294 | AT2G34260.1 | transducin family protein / WD-40 repeat family protein                             |
| A_84_P23021  | 1.072708 | AT2G29090.1 | CYP707A2 (cytochrome P450, family 707, subfamily A, polypeptide 2)                  |
| A_84_P788550 | 1.073882 | AT1G31180.1 | 3-isopropylmalate dehydrogenase, chloroplast, putative                              |
| A_84_P15758  | 1.076022 | AT4G31000.1 | calmodulin-binding protein                                                          |
| A_84_P62700  | 1.076293 | AT5G06530.1 | ABC transporter family protein                                                      |
| A_84_P19632  | 1.076513 | AT5G11740.1 | AGP15 (ARABINOGALACTAN PROTEIN 15)                                                  |
| A_84_P104386 | 1.076981 | AT2G04100.1 | MATE efflux family protein                                                          |
| A_84_P10711  | 1.077112 | AT2G39330.1 | jacalin lectin family protein                                                       |
| A_84_P14693  | 1.07767  | AT3G59750.1 | receptor lectin kinase, putative                                                    |
| A_84_P11973  | 1.079339 | AT4G30110.1 | HMA2 (Heavy metal ATPase 2)                                                         |
| A_84_P17934  | 1.079847 | AT5G04340.1 | C2H2 (ZINC FINGER OF ARABIDOPSIS THALIANA 6)                                        |
| A_84_P18855  | 1.082071 | AT5G17030.1 | UDP-glucuronosyl/UDP-glucosyl transferase family protein                            |
| A_84_P97466  | 1.082591 | AT2G27830.1 | similar to pentatricopeptide (PPR) repeat-containing protein [Arabidopsis thaliana] |
| A_84_P808187 | 1.08311  | AT1G70850.3 | MLP34 (MLP-LIKE PROTEIN 34)                                                         |
| A_84_P21578  | 1.08318  | AT5G39670.1 | calcium-binding EF hand family protein                                              |
| A_84_P540304 | 1.084862 | AT3G02500.1 | similar to unknown protein [Arabidopsis thaliana] (TAIR:AT5G16030.1)                |
| A_84_P13988  | 1.086488 | AT5G25450.1 | ubiquinol-cytochrome C reductase complex 14 kDa protein, putative                   |

|              |          |             |                                                                                   |
|--------------|----------|-------------|-----------------------------------------------------------------------------------|
| A_84_P189624 | 1.086702 | AT1G70890.1 | MLP43 (MLP-LIKE PROTEIN 43)                                                       |
| A_84_P859998 | 1.08706  | AT3G54600.1 | DJ-1 family protein                                                               |
| A_84_P284940 | 1.088476 | AT1G70270.1 | unknown protein                                                                   |
| A_84_P14811  | 1.090364 | AT4G30680.1 | MA3 domain-containing protein                                                     |
| A_84_P18587  | 1.090572 | AT1G08090.1 | ATNRT2:1 (Arabidopsis thaliana high affinity nitrate transporter 2.1)             |
| A_84_P21298  | 1.090939 | AT3G55910.1 | unknown protein                                                                   |
| A_84_P88649  | 1.092862 | AT2G02850.1 | ARPN (PLANTACYANIN); copper ion binding                                           |
| A_84_P234563 | 1.097899 | AT2G25250.1 | similar to unknown protein [Arabidopsis thaliana] (TAIR:AT4G32020.1)              |
| A_84_P11850  | 1.098121 | AT3G57760.1 | protein kinase family protein                                                     |
| A_84_P14817  | 1.098124 | AT1G27100.1 | similar to unknown protein [Arabidopsis thaliana] (TAIR:AT1G69900.1)              |
| A_84_P15766  | 1.099524 | AT4G32980.1 | ATH1 (ARABIDOPSIS THALIANA HOMEODOMAIN GENE 1); transcription factor              |
| A_84_P17822  | 1.099736 | AT5G47070.1 | protein kinase, putative                                                          |
| A_84_P556095 | 1.100072 | AT1G77030.1 | glycine-rich protein                                                              |
| A_84_P11184  | 1.101707 | AT1G72240.1 | similar to unknown protein [Arabidopsis thaliana] (TAIR:AT1G22470.1)              |
| A_84_P769565 | 1.101946 | AT5G44585.1 | unknown protein                                                                   |
| A_84_P17520  | 1.10239  | AT1G24070.1 | ATCSLA10 (Cellulose synthase-like A10); transferase, transferring glycosyl groups |
| A_84_P186514 | 1.103148 | AT5G45100.1 | protein binding / zinc ion binding                                                |
| A_84_P19766  | 1.10415  | AT5G60950.1 | COBL5 (COBRA-LIKE PROTEIN 5 PRECURSOR)                                            |
| A_84_P16478  | 1.104653 | AT3G14460.1 | disease resistance protein (NBS-LRR class), putative                              |
| A_84_P10124  | 1.10639  | AT4G14560.1 | IAA1 (INDOLE-3-ACETIC ACID INDUCIBLE); transcription factor                       |
| A_84_P823769 | 1.112104 | AT3G58980.1 | F-box family protein                                                              |
| A_84_P228659 | 1.114819 | AT2G32190.1 | similar to unknown protein [Arabidopsis thaliana] (TAIR:AT2G32210.1)              |
| A_84_P503591 | 1.11605  | AT4G25990.1 | CIL                                                                               |
| A_84_P19576  | 1.116853 | AT4G39940.1 | AKN2 (APS-KINASE 2); ATP binding / kinase/ transferase                            |
| A_84_P15781  | 1.117433 | AT4G37370.1 | CYP81D8 (cytochrome P450, family 81, subfamily D, polypeptide 8)                  |
| A_84_P13165  | 1.119138 | AT5G65320.1 | basic helix-loop-helix (bHLH) family protein                                      |
| A_84_P251265 | 1.119472 | AT1G63720.1 | similar to hydroxyproline-rich glycoprotein family protein [Arabidopsis thaliana] |
| A_84_P13043  | 1.121628 | AT5G25440.1 | protein kinase family protein                                                     |
| A_84_P593798 | 1.121756 | AT3G61660.1 | similar to unknown protein [Arabidopsis thaliana] (TAIR:AT2G46375.1)              |
| A_84_P801093 | 1.122152 | AT5G37770.1 | TCH2 (TOUCH 2); calcium ion binding                                               |
| A_84_P19805  | 1.122262 | AT5G28650.1 | WRKY74 (WRKY DNA-binding protein 74); transcription factor                        |
| A_84_P18676  | 1.123923 | AT5G08520.1 | myb family transcription factor                                                   |
| A_84_P137499 | 1.125701 | AT2G20180.1 | PIL5 (PHYTOCHROME INTERACTING FACTOR 3-LIKE 5); transcription factor              |

|              |          |             |                                                                      |
|--------------|----------|-------------|----------------------------------------------------------------------|
| A_84_P813646 | 1.126054 | AT2G26530.1 | AR781 [AT2G26530.1]                                                  |
| A_84_P23050  | 1.126601 | AT3G04720.1 | PR4 (PATHOGENESIS-RELATED 4)                                         |
| A_84_P803216 | 1.126918 | AT5G06320.1 | NHL3 (NDR1/HIN1-like 3)                                              |
| A_84_P13699  | 1.128679 | AT3G48550.1 | similar to ATIDD15/SGR5                                              |
| A_84_P21942  | 1.129283 | AT1G51850.1 | leucine-rich repeat protein kinase, putative                         |
| A_84_P21685  | 1.12971  | AT5G67450.1 | AZF1 (ARABIDOPSIS ZINC-FINGER PROTEIN 1)                             |
| A_84_P19981  | 1.129993 | AT1G30370.1 | lipase class 3 family protein                                        |
| A_84_P550347 | 1.130426 | AT4G39720.1 | VQ motif-containing protein                                          |
| A_84_P21312  | 1.13128  | AT3G59440.1 | calcium-binding protein, putative                                    |
| A_84_P21842  | 1.131429 | AT1G65860.1 | flavin-containing monooxygenase family protein / FMO family protein  |
| A_84_P19217  | 1.131507 | AT2G20610.1 | SUR1 (SUPERROOT 1); transaminase                                     |
| A_84_P16742  | 1.134242 | AT4G14680.1 | APS3 (ATP sulfurylase 2); sulfate adenylyltransferase (ATP)          |
| A_84_P288470 | 1.135834 | AT4G23220.1 | protein kinase family protein                                        |
| A_84_P18856  | 1.137243 | AT5G17490.1 | RGL3 (RGA-LIKE 3); transcription factor                              |
| A_84_P21078  | 1.137646 | AT2G21200.1 | auxin-responsive protein, putative                                   |
| A_84_P16825  | 1.137649 | AT5G25490.1 | zinc finger (Ran-binding) family protein                             |
| A_84_P18720  | 1.137812 | AT5G26340.1 | MSS1 (SUGAR TRANSPORT PROTEIN 13)                                    |
| A_84_P14907  | 1.140037 | AT5G13700.1 | APAO/ATPAO1 (POLYAMINE OXIDASE 1); FAD binding / polyamine oxidase   |
| A_84_P205258 | 1.142823 | AT3G12150.1 | similar to hypothetical protein [Vitis vinifera] (GB:CAN81264.1)     |
| A_84_P24034  | 1.143078 | AT3G17760.1 | GAD5 (GLUTAMATE DECARBOXYLASE 5); calmodulin binding                 |
| A_84_P72634  | 1.143873 | AT4G36500.1 | similar to unknown protein [Arabidopsis thaliana] (TAIR:AT2G18210.1) |
| A_84_P13426  | 1.144018 | AT1G57750.1 | CYP96A15/MAH1 (MID-CHAIN ALKANE HYDROXYLASE 1); oxygen binding       |
| A_84_P528136 | 1.144076 | AT4G23190.1 | CRK11 (CYSTEINE-RICH RLK11); kinase                                  |
| A_84_P19668  | 1.145035 | AT5G27220.1 | protein transport protein-related                                    |
| A_84_P21600  | 1.14885  | AT5G45650.1 | subtilase family protein                                             |
| A_84_P582090 | 1.150253 | AT3G18773.1 | zinc finger (C3HC4-type RING finger) family protein                  |
| A_84_P16571  | 1.150664 | AT3G56400.1 | WRKY70 (WRKY DNA-binding protein 70); transcription factor           |
| A_84_P206488 | 1.151989 | AT1G35230.1 | AGP5 (ARABINOGALACTAN-PROTEIN 5)                                     |
| A_84_P580100 | 1.152034 | AT1G77960.1 | similar to unknown protein [Arabidopsis thaliana] (TAIR:AT1G28630.4) |
| A_84_P229729 | 1.154789 | AT2G20142.1 | transmembrane receptor                                               |
| A_84_P784826 | 1.155781 | AT1G61260.1 | similar to unknown protein [Arabidopsis thaliana] (TAIR:AT1G11220.1) |
| A_84_P267250 | 1.156973 | AT5G44190.1 | GLK2 (GOLDEN2-LIKE 2); DNA binding / transcription factor            |
| A_84_P22647  | 1.157042 | AT5G08330.1 | TCP family transcription factor, putative                            |
| A_84_P556161 | 1.157057 | AT2G22620.1 | lyase                                                                |
| A_84_P11822  | 1.158147 | AT3G51450.1 | strictosidine synthase family protein                                |

|              |          |             |                                                                                    |
|--------------|----------|-------------|------------------------------------------------------------------------------------|
| A_84_P22932  | 1.159751 | AT2G22770.1 | NAI1; DNA binding / transcription factor                                           |
| A_84_P565178 | 1.159928 | AT3G25882.1 | NIMIN-2 (NIM1-INTERACTING 2)                                                       |
| A_84_P839208 | 1.160017 | AT1G70260.1 | nodulin MtN21 family protein                                                       |
| A_84_P242875 | 1.160087 | AT3G03030.1 | F-box family protein                                                               |
| A_84_P22610  | 1.160531 | AT5G62210.1 | embryo-specific protein-related                                                    |
| A_84_P591022 | 1.161528 | AT3G21530.1 | endonuclease/exonuclease/phosphatase family protein                                |
| A_84_P11694  | 1.161657 | AT3G01830.1 | calmodulin-related protein, putative                                               |
| A_84_P579612 | 1.162552 | AT4G27652.1 | similar to unknown protein [Arabidopsis thaliana] (TAIR:AT4G27657.1)               |
| A_84_P20172  | 1.163194 | AT2G34490.1 | CYP710A2 (cytochrome P450, family 710, subfamily A, polypeptide 2)                 |
| A_84_P302850 | 1.165603 | AT2G37870.1 | protease inhibitor/seed storage/lipid transfer protein (LTP) family protein        |
| A_84_P223559 | 1.167574 | AT2G14560.1 | similar to unknown protein [Arabidopsis thaliana] (TAIR:AT1G33840.1)               |
| A_84_P194694 | 1.167693 | AT2G38860.1 | YLS5 (yellow-leaf-specific gene 5)                                                 |
| A_84_P171543 | 1.168109 | AT2G28460.1 | protein binding / zinc ion binding                                                 |
| A_84_P766550 | 1.168142 | AT5G25130.1 | CYP71B12 (cytochrome P450, family 71, subfamily B, polypeptide 12); oxygen binding |
| A_84_P610685 | 1.168268 | AT3G59670.1 | similar to unknown protein [Arabidopsis thaliana] (TAIR:AT4G37440.2)               |
| A_84_P190014 | 1.168563 | AT4G36030.1 | armadillo/beta-catenin repeat family protein                                       |
| A_84_P15826  | 1.171426 | AT5G05600.1 | oxidoreductase, 2OG-Fe(II) oxygenase family protein                                |
| A_84_P141659 | 1.173521 | AT4G01360.1 | similar to BPS1 (BYPASS 1) [Arabidopsis thaliana] (TAIR:AT1G01550.2)               |
| A_84_P14348  | 1.174802 | AT1G13700.1 | glucosamine/galactosamine-6-phosphate isomerase family protein                     |
| A_84_P13029  | 1.177501 | AT5G18630.1 | lipase class 3 family protein                                                      |
| A_84_P145439 | 1.177527 | AT2G31865.1 | poly (ADP-ribose) glycohydrolase (PARG) family protein                             |
| A_84_P760477 | 1.181044 | AT3G03855.1 | pseudogene of disease resistance protein                                           |
| A_84_P89389  | 1.181757 | AT4G15760.1 | monooxygenase, putative (MO1)                                                      |
| A_84_P10415  | 1.183828 | AT1G52030.1 | MBP2 (MYROSINASE-BINDING PROTEIN 2)                                                |
| A_84_P19549  | 1.184343 | AT4G32790.1 | exostosin family protein                                                           |
| A_84_P10598  | 1.184621 | AT1G33600.1 | leucine-rich repeat family protein                                                 |
| A_84_P826417 | 1.18626  | AT5G24110.1 | WRKY30 (WRKY DNA-binding protein 30); transcription factor                         |
| A_84_P20844  | 1.186458 | AT1G09480.1 | cinnamyl-alcohol dehydrogenase family / CAD family                                 |
| A_84_P11067  | 1.186792 | AT1G48020.1 | invertase/pectin methylesterase inhibitor family protein                           |
| A_84_P828765 | 1.189142 | AT2G43930.1 | protein kinase family protein                                                      |
| A_84_P12956  | 1.189978 | AT4G39830.1 | L-ascorbate oxidase, putative                                                      |
| A_84_P22181  | 1.190524 | AT3G28210.1 | PMZ; zinc ion binding                                                              |
| A_84_P23478  | 1.191001 | AT5G41750.1 | disease resistance protein (TIR-NBS-LRR class), putative                           |
| A_84_P13379  | 1.193903 | AT1G52830.1 | IAA6 (indoleacetic acid-induced protein 6); transcription factor                   |
| A_84_P282640 | 1.194084 | AT2G23170.1 | GH3.3; indole-3-acetic acid amido synthetase                                       |
| A_84_P21202  | 1.194892 | AT3G12830.1 | auxin-responsive family protein                                                    |

|              |          |             |                                                                                         |
|--------------|----------|-------------|-----------------------------------------------------------------------------------------|
| A_84_P763881 | 1.195687 | AT4G20830.1 | FAD-binding domain-containing protein                                                   |
| A_84_P575245 | 1.195705 | AT5G16190.1 | ATCSLA11 (Cellulose synthase-like A11)                                                  |
| A_84_P20642  | 1.197617 | AT5G42250.1 | alcohol dehydrogenase, putative                                                         |
| A_84_P545592 | 1.197853 | AT2G39650.1 | similar to unknown protein [Arabidopsis thaliana] (TAIR:AT4G14620.1)                    |
| A_84_P10997  | 1.198119 | AT4G23310.1 | receptor-like protein kinase, putative                                                  |
| A_84_P10152  | 1.198127 | AT5G04760.1 | myb family transcription factor                                                         |
| A_84_P11714  | 1.199403 | AT3G04210.1 | disease resistance protein (TIR-NBS class), putative                                    |
| A_84_P263710 | 1.200566 | AT3G27960.1 | kinesin light chain-related                                                             |
| A_84_P23123  | 1.201613 | AT3G13672.1 | seven in absentia (SINA) family protein                                                 |
| A_84_P10517  | 1.201954 | AT1G73860.1 | microtubule motor                                                                       |
| A_84_P19825  | 1.202856 | AT5G04190.1 | PKS4 (PHYTOCHROME KINASE SUBSTRATE 4)                                                   |
| A_84_P13368  | 1.206261 | AT1G20160.1 | ATSBT5.2; subtilase                                                                     |
| A_84_P812905 | 1.207407 | AT3G22231.1 | PCC1 (PATHOGEN AND CIRCADIAN CONTROLLED 1)                                              |
| A_84_P18975  | 1.20886  | AT1G10560.1 | armadillo/beta-catenin repeat family protein / U-box domain-containing protein          |
| A_84_P845967 | 1.209224 | AT5G22570.1 | WRKY38 (WRKY DNA-binding protein 38); transcription factor                              |
| A_84_P208698 | 1.210814 | AT3G12890.1 | ASML2 (ACTIVATOR OF SPOMIN::LUC2)                                                       |
| A_84_P209868 | 1.211643 | AT2G32130.1 | similar to UNE1 (unfertilized embryo sac 1) [Arabidopsis thaliana] (TAIR:AT1G29300.1)   |
| A_84_P134445 | 1.212743 | AT5G60760.1 | 2-phosphoglycerate kinase-related                                                       |
| A_84_P23279  | 1.213346 | AT4G20430.1 | subtilase family protein                                                                |
| A_84_P503480 | 1.215112 | AT5G45630.1 | similar to unknown protein [Arabidopsis thaliana] (TAIR:AT4G18980.1)                    |
| A_84_P21246  | 1.217253 | AT3G43960.1 | cysteine proteinase, putative                                                           |
| A_84_P177674 | 1.217269 | AT5G25210.1 | similar to unknown protein [Arabidopsis thaliana] (TAIR:AT4G32030.1)                    |
| A_84_P753793 | 1.218995 | AT1G70830.4 | MLP28 (MLP-LIKE PROTEIN 28)                                                             |
| A_84_P23859  | 1.219042 | AT2G30250.1 | WRKY25 (WRKY DNA-binding protein 25); transcription factor                              |
| A_84_P587549 | 1.219613 | AT3G60470.1 | similar to unknown protein [Arabidopsis thaliana] (TAIR:AT2G44930.1)                    |
| A_84_P18681  | 1.221454 | AT5G10520.1 | RBK1 (ROP BINDING PROTEIN KINASES 1); kinase [AT5G10520.1]                              |
| A_84_P855311 | 1.222797 | AT4G03210.1 | XTH9 (XYLOGLUCAN ENDOTRANSGLUCOSYLASE/HYDROLASE 9); hydrolase, acting on glycosyl bonds |
| A_84_P11470  | 1.227337 | AT1G66400.1 | calmodulin-related protein, putative                                                    |
| A_84_P12512  | 1.227819 | AT2G29890.1 | VLN1 (VILLIN 1); actin binding                                                          |
| A_84_P125601 | 1.229279 | AT3G22240.1 | unknown protein                                                                         |
| A_84_P23151  | 1.230016 | AT3G47110.1 | leucine-rich repeat transmembrane protein kinase, putative                              |
| A_84_P538806 | 1.230441 | AT4G31877.1 | MIR156C; miRNA                                                                          |
| A_84_P12367  | 1.230586 | AT1G11670.1 | MATE efflux family protein                                                              |
| A_84_P85269  | 1.230838 | AT1G24909.1 | anthranilate synthase beta subunit, putative                                            |

|              |          |             |                                                                           |
|--------------|----------|-------------|---------------------------------------------------------------------------|
| A_84_P611583 | 1.232832 | AT3G60960.1 | pentatricopeptide (PPR) repeat-containing protein                         |
| A_84_P18640  | 1.233181 | AT4G16590.1 | ATCSLA01 (Cellulose synthase-like A1)                                     |
| A_84_P16606  | 1.234823 | AT4G01250.1 | WRKY22 (WRKY DNA-binding protein 22); transcription factor                |
| A_84_P11902  | 1.234964 | AT4G09420.1 | disease resistance protein (TIR-NBS class), putative                      |
| A_84_P21864  | 1.236259 | AT1G73805.1 | calmodulin binding                                                        |
| A_84_P13883  | 1.237497 | AT4G34850.1 | chalcone and stilbene synthase family protein                             |
| A_84_P22857  | 1.239193 | AT1G17990.1 | 12-oxophytodienoate reductase, putative                                   |
| A_84_P22740  | 1.240631 | AT1G77200.1 | AP2 domain-containing transcription factor TINY, putative                 |
| A_84_P18571  | 1.240941 | AT4G25630.1 | FIB2 (FIBRILLARIN 2)                                                      |
| A_84_P146458 | 1.241314 | AT5G24290.1 | integral membrane family protein                                          |
| A_84_P173921 | 1.241354 | AT2G47440.1 | DNAJ heat shock N-terminal domain-containing protein                      |
| A_84_P20156  | 1.24376  | AT2G41430.1 | ERD15 (EARLY RESPONSIVE TO DEHYDRATION 15)                                |
| A_84_P10559  | 1.245003 | AT1G01560.1 | ATMPK11 (Arabidopsis thaliana MAP kinase 11); MAP kinase/ kinase          |
| A_84_P10871  | 1.248605 | AT3G50280.1 | transferase family protein                                                |
| A_84_P91079  | 1.248756 | AT5G22520.1 | similar to unknown protein [Arabidopsis thaliana] (TAIR:AT5G22530.1)      |
| A_84_P211588 | 1.251372 | AT4G24110.1 | similar to unnamed protein product [Vitis vinifera] (GB:CAO62924.1)       |
| A_84_P602094 | 1.253338 | AT5G54720.1 | ankyrin repeat family protein                                             |
| A_84_P22377  | 1.253603 | AT4G30430.1 | TET9 (TETRASPANIN9)                                                       |
| A_84_P21994  | 1.25598  | AT2G26440.1 | pectinesterase family protein                                             |
| A_84_P10967  | 1.257092 | AT4G11890.1 | protein kinase family protein                                             |
| A_84_P528334 | 1.257247 | AT5G50915.1 | basic helix-loop-helix (bHLH) family protein                              |
| A_84_P19202  | 1.257781 | AT2G30860.1 | ATGSTF9 (Arabidopsis thaliana Glutathione S-transferase (class phi) 9)    |
| A_84_P564785 | 1.258365 | AT1G14250.1 | nucleoside phosphatase family protein / GDA1/CD39 family protein          |
| A_84_P555983 | 1.259199 | AT1G30190.1 | similar to unknown protein [Arabidopsis thaliana] (TAIR:AT2G34610.1)      |
| A_84_P11156  | 1.260398 | AT5G26170.1 | WRKY50 (WRKY DNA-binding protein 50); transcription factor                |
| A_84_P303810 | 1.260819 | AT1G56150.1 | auxin-responsive family protein                                           |
| A_84_P12144  | 1.261059 | AT5G45720.1 | ATP binding / DNA binding                                                 |
| A_84_P13407  | 1.262384 | AT1G18590.1 | sulfotransferase family protein                                           |
| A_84_P19021  | 1.263564 | AT1G70520.1 | protein kinase family protein                                             |
| A_84_P11463  | 1.264113 | AT1G73620.1 | thaumatin-like protein, putative / pathogenesis-related protein, putative |
| A_84_P17546  | 1.264875 | AT3G44860.1 | FAMT (FARNESOIC ACID CARBOXYL-O-METHYLTRANSFERASE)                        |
| A_84_P787018 | 1.265331 | AT1G51670.1 | similar to unknown protein [Arabidopsis thaliana] (TAIR:AT1G48180.1)      |
| A_84_P56360  | 1.266279 | AT5G57010.1 | calmodulin-binding family protein                                         |
| A_84_P19511  | 1.268201 | AT4G24380.1 | hydrolase, acting on ester bonds                                          |
| A_84_P69204  | 1.270215 | AT1G21110.1 | O-methyltransferase, putative                                             |
| A_84_P294634 | 1.27125  | AT5G53500.1 | WD-40 repeat family protein                                               |
| A_84_P561097 | 1.272138 | AT5G46295.1 | unknown protein                                                           |

|              |          |             |                                                                                         |
|--------------|----------|-------------|-----------------------------------------------------------------------------------------|
| A_84_P828366 | 1.272763 | AT1G33610.1 | leucine-rich repeat family protein                                                      |
| A_84_P255510 | 1.273598 | AT1G72450.1 | JAZ6/TIFY11B (JASMONATE-ZIM-DOMAIN PROTEIN 6)                                           |
| A_84_P760208 | 1.273625 | AT3G26620.1 | LBD23 (LOB DOMAIN-CONTAINING PROTEIN 23)                                                |
| A_84_P528434 | 1.273798 | AT5G56960.1 | basic helix-loop-helix (bHLH) family protein                                            |
| A_84_P544532 | 1.275982 | AT1G58225.1 | unknown protein                                                                         |
| A_84_P530104 | 1.276333 | AT5G52740.1 | heavy-metal-associated domain-containing protein                                        |
| A_84_P128501 | 1.276627 | AT5G23480.1 | similar to SWIB complex BAF60b domain-containing protein                                |
| A_84_P510027 | 1.277095 | AT2G04495.1 | similar to unknown protein [Arabidopsis thaliana] (TAIR:AT2G04515.1)                    |
| A_84_P18180  | 1.277805 | AT2G31880.1 | leucine-rich repeat transmembrane protein kinase, putative                              |
| A_84_P844205 | 1.278804 | AT4G23160.1 | protein kinase family protein                                                           |
| A_84_P16668  | 1.283319 | AT4G23200.1 | protein kinase family protein                                                           |
| A_84_P19999  | 1.284061 | AT1G52770.1 | phototropic-responsive NPH3 family protein                                              |
| A_84_P786411 | 1.284526 | AT4G03060.1 | AOP2 (ALKENYL HYDROXALKYL PRODUCING 2)                                                  |
| A_84_P785249 | 1.284966 | AT4G31800.1 | WRKY18 (WRKY DNA-binding protein 18); transcription factor                              |
| A_84_P824302 | 1.285138 | AT4G29310.1 | similar to unknown protein [Arabidopsis thaliana] (TAIR:AT1G10020.1)                    |
| A_84_P558681 | 1.290301 | AT1G53885.1 | senescence-associated protein-related                                                   |
| A_84_P13064  | 1.290461 | AT5G38850.1 | disease resistance protein (TIR-NBS-LRR class), putative                                |
| A_84_P17710  | 1.291601 | AT5G02760.1 | protein phosphatase 2C family protein / PP2C family protein                             |
| A_84_P53500  | 1.291702 | AT2G35310.1 | transcriptional factor B3 family protein                                                |
| A_84_P18579  | 1.293163 | AT4G27300.1 | S-locus protein kinase, putative                                                        |
| A_84_P786499 | 1.293495 | AT3G25760.1 | AOC1 (ALLENE OXIDE CYCLASE 1)                                                           |
| A_84_P603116 | 1.295915 | AT1G13670.1 | unknown protein                                                                         |
| A_84_P830096 | 1.295984 | AT5G44575.1 | unknown protein                                                                         |
| A_84_P752754 | 1.297524 | AT1G64195.1 | Encodes a defensin-like (DEFL) family protein.                                          |
| A_84_P17326  | 1.301825 | AT2G38470.1 | WRKY33 (WRKY DNA-binding protein 33); transcription factor                              |
| A_84_P270130 | 1.305658 | AT4G18440.1 | adenylosuccinate lyase, putative / adenylosuccinase, putative                           |
| A_84_P175491 | 1.307128 | AT5G62520.1 | SRO5 (SIMILAR TO RCD ONE 5); NAD <sup>+</sup> ADP-ribosyltransferase                    |
| A_84_P16831  | 1.31027  | AT5G27420.1 | zinc finger (C3HC4-type RING finger) family protein                                     |
| A_84_P600694 | 1.310868 | AT2G30900.1 | similar to unknown protein [Arabidopsis thaliana] (TAIR:AT2G42570.1)                    |
| A_84_P16493  | 1.311266 | AT3G22600.1 | protease inhibitor/seed storage/lipid transfer protein (LTP) family protein             |
| A_84_P21449  | 1.312194 | AT4G34770.1 | auxin-responsive family protein                                                         |
| A_84_P22810  | 1.312283 | AT1G73830.1 | BEE3 (BR ENHANCED EXPRESSION 3); DNA binding / transcription factor                     |
| A_84_P21275  | 1.312908 | AT3G50930.1 | AAA-type ATPase family protein                                                          |
| A_84_P11030  | 1.312989 | AT4G30450.1 | glycine-rich protein                                                                    |
| A_84_P22617  | 1.314619 | AT5G64000.1 | SAL2; 3'(2'),5'-bisphosphate nucleotidase/ inositol or phosphatidylinositol phosphatase |

|              |          |             |                                                                                          |
|--------------|----------|-------------|------------------------------------------------------------------------------------------|
| A_84_P20114  | 1.315692 | AT2G32680.1 | disease resistance family protein                                                        |
| A_84_P11230  | 1.315727 | AT5G54190.1 | PORA (Protochlorophyllide reductase A); oxidoreductase/<br>protochlorophyllide reductase |
| A_84_P158475 | 1.318592 | AT2G41640.1 | similar to unknown protein [Arabidopsis thaliana] (TAIR:AT3G57380.1)                     |
| A_84_P522226 | 1.319155 | AT5G57420.1 | IAA33 (indoleacetic acid-induced protein 33); transcription factor<br>[AT5G57420.1]      |
| A_84_P146199 | 1.319419 | AT5G05440.1 | similar to unknown protein [Arabidopsis thaliana] (TAIR:AT2G38310.1)                     |
| A_84_P14294  | 1.321774 | AT1G63750.1 | ATP binding / nucleoside-triphosphatase/ nucleotide binding / protein<br>binding         |
| A_84_P24055  | 1.322268 | AT3G28890.1 | leucine-rich repeat family protein                                                       |
| A_84_P16283  | 1.322915 | AT2G43290.1 | MSS3 (MULTICOPY SUPPRESSORS OF SNF4 DEFICIENCY IN<br>YEAST 3); calcium ion binding       |
| A_84_P14299  | 1.323085 | AT1G75040.1 | PR5 (PATHOGENESIS-RELATED GENE 5)                                                        |
| A_84_P14898  | 1.325253 | AT5G10760.1 | aspartyl protease family protein                                                         |
| A_84_P85619  | 1.3276   | AT1G63090.1 | ATPP2-A11 (Phloem protein 2-A11); carbohydrate binding                                   |
| A_84_P173081 | 1.329994 | AT3G14510.1 | geranylgeranyl pyrophosphate synthase                                                    |
| A_84_P281450 | 1.330869 | AT1G21270.1 | WAK2 (wall-associated kinase 2); protein serine/threonine kinase                         |
| A_84_P18192  | 1.33106  | AT2G20750.1 | ATEXPB1 (ARABIDOPSIS THALIANA EXPANSIN B1)                                               |
| A_84_P20045  | 1.332645 | AT1G57630.1 | disease resistance protein (TIR class), putative                                         |
| A_84_P176794 | 1.333372 | AT1G70990.1 | proline-rich family protein                                                              |
| A_84_P16943  | 1.334428 | AT1G52410.1 | TSA1 (TSK-ASSOCIATING PROTEIN 1)                                                         |
| A_84_P312233 | 1.335156 | AT4G23230.1 | protein kinase family protein                                                            |
| A_84_P554830 | 1.336137 | AT5G20635.1 | receptor                                                                                 |
| A_84_P16824  | 1.336958 | AT5G25280.1 | serine-rich protein-related                                                              |
| A_84_P21591  | 1.337506 | AT5G43170.1 | AZF3 (ARABIDOPSIS ZINC-FINGER PROTEIN 3)                                                 |
| A_84_P21745  | 1.337656 | AT1G02400.1 | ATGA2OX6/DTA1 (GIBBERELLIN 2-OXIDASE 6); gibberellin<br>2-beta-dioxygenase               |
| A_84_P119582 | 1.338158 | AT5G48490.1 | protease inhibitor/seed storage/lipid transfer protein (LTP) family protein              |
| A_84_P757222 | 1.340683 | AT2G16367.1 | Encodes a defensin-like (DEFL) family protein.                                           |
| A_84_P16567  | 1.341501 | AT3G55560.1 | AGF2 (AT-HOOK PROTEIN OF GA FEEDBACK 2)                                                  |
| A_84_P13943  | 1.342325 | AT5G07460.1 | PMSR2 (PEPTIDEMETHIONINE SULFOXIDE REDUCTASE 2)                                          |
| A_84_P220458 | 1.34288  | AT4G23610.1 | similar to unknown protein [Arabidopsis thaliana] (TAIR:AT3G54200.1)                     |
| A_84_P545036 | 1.345585 | AT4G39795.1 | senescence-associated protein-related                                                    |
| A_84_P22952  | 1.346076 | AT2G46650.1 | B5 #1 (cytochrome b5 family protein #1)                                                  |
| A_84_P607908 | 1.348491 | AT3G15300.1 | VQ motif-containing protein                                                              |
| A_84_P22659  | 1.349407 | AT1G56540.1 | disease resistance protein (TIR-NBS-LRR class), putative                                 |
| A_84_P10495  | 1.349901 | AT1G65890.1 | acyl-activating enzyme 12 (AAE12)                                                        |



|              |          |             |                                                                                         |
|--------------|----------|-------------|-----------------------------------------------------------------------------------------|
| A_84_P559351 | 1.353117 | AT5G55460.1 | protease inhibitor/seed storage/lipid transfer protein (LTP) family protein             |
| A_84_P16678  | 1.354701 | AT4G25420.1 | GA5 (GA REQUIRING 5)                                                                    |
| A_84_P20971  | 1.355485 | AT1G22340.1 | ATUGT85A7 (UDP-GLUCOSYL TRANSFERASE 85A7)                                               |
| A_84_P829039 | 1.355689 | AT4G19515.1 | disease resistance family protein                                                       |
| A_84_P10399  | 1.356306 | AT1G17745.1 | PGDH (3-PHOSPHOGLYCERATE DEHYDROGENASE); phosphoglycerate dehydrogenase                 |
| A_84_P11197  | 1.357747 | AT5G45110.1 | NPR3 (NPR1-LIKE PROTEIN 3); protein binding                                             |
| A_84_P22672  | 1.365033 | AT1G03457.1 | RNA-binding protein, putative                                                           |
| A_84_P19484  | 1.369376 | AT4G13770.1 | CYP83A1 (CYTOCHROME P450 83A1); oxygen binding                                          |
| A_84_P13295  | 1.371622 | AT1G22650.1 | beta-fructofuranosidase                                                                 |
| A_84_P21554  | 1.37182  | AT5G25380.1 | CYCA2;1 (CYCLIN A2;1); cyclin-dependent protein kinase regulator                        |
| A_84_P141439 | 1.372346 | AT5G24770.1 | VSP2 (VEGETATIVE STORAGE PROTEIN 2); acid phosphatase [                                 |
| A_84_P751820 | 1.372666 | AT1G26200.1 | pseudogene, putative fungal resistance protein Asc1                                     |
| A_84_P22972  | 1.37499  | AT2G42980.1 | aspartyl protease family protein                                                        |
| A_84_P597689 | 1.377716 | AT5G65340.1 | similar to unknown protein [Arabidopsis thaliana] (TAIR:AT2G22460.1)                    |
| A_84_P869713 | 1.379503 | AT5G52760.1 | heavy-metal-associated domain-containing protein                                        |
| A_84_P20050  | 1.383285 | AT1G14370.1 | APK2A (PROTEIN KINASE 2A); kinase                                                       |
| A_84_P18092  | 1.3849   | AT1G51620.1 | protein kinase family protein                                                           |
| A_84_P826409 | 1.385045 | AT4G34250.1 | fatty acid elongase, putative                                                           |
| A_84_P10684  | 1.386603 | AT2G23010.1 | SCPL9; serine carboxypeptidase                                                          |
| A_84_P20018  | 1.388414 | AT1G12630.1 | DNA binding / transcription activator/ transcription factor                             |
| A_84_P23462  | 1.392878 | AT5G37540.1 | aspartyl protease family protein                                                        |
| A_84_P788748 | 1.393286 | AT1G13470.1 | similar to unknown protein [Arabidopsis thaliana] (TAIR:AT1G13520.1)                    |
| A_84_P168493 | 1.395149 | AT3G46620.1 | zinc finger (C3HC4-type RING finger) family protein                                     |
| A_84_P594938 | 1.395637 | AT5G46490.2 | disease resistance protein (TIR-NBS class), putative                                    |
| A_84_P128551 | 1.397902 | AT5G03670.1 | similar to unknown protein [Arabidopsis thaliana] (TAIR:AT2G36420.1)                    |
| A_84_P19830  | 1.398001 | AT1G35350.1 | similar to SHB1 (SHORT HYPOCOTYL UNDER BLUE1) [Arabidopsis thaliana] (TAIR:AT4G25350.1) |
| A_84_P607832 | 1.399294 | AT2G41150.1 | similar to unknown protein [Arabidopsis thaliana] (TAIR:AT3G56750.1)                    |
| A_84_P569157 | 1.400002 | AT5G67410.1 | similar to unknown protein [Arabidopsis thaliana] (TAIR:AT2G14850.1)                    |
| A_84_P520804 | 1.400556 | AT3G06020.1 | similar to unknown protein [Arabidopsis thaliana] (TAIR:AT5G19260.1)                    |
| A_84_P800816 | 1.400765 | AT3G10985.1 | SAG20 (WOUND-INDUCED PROTEIN 12)                                                        |
| A_84_P12886  | 1.401894 | AT4G23130.1 | CRK5 (CYSTEINE-RICH RLK5); kinase                                                       |
| A_84_P19375  | 1.402714 | AT3G49110.1 | ATPCA/ATPRX33/PRX33/PRXCA (PEROXIDASE 33); peroxidase                                   |
| A_84_P109962 | 1.407337 | AT1G21240.1 | WAK3 (WALL ASSOCIATED KINASE 3); kinase/ protein serine/threonine kinase                |
| A_84_P786204 | 1.409027 | AT1G21310.1 | ATEXT3 (EXTENSIN 3); structural constituent of cell wall                                |

|              |          |             |                                                                                           |
|--------------|----------|-------------|-------------------------------------------------------------------------------------------|
| A_84_P554758 | 1.410039 | AT4G37810.1 | similar to unknown protein [Arabidopsis thaliana] (TAIR:AT5G10310.1)                      |
| A_84_P14253  | 1.410891 | AT1G79400.1 | ATCHX2 (CATION/H+ EXCHANGER 2); monovalent cation:proton antiporter                       |
| A_84_P751391 | 1.413114 | AT1G21525.1 | pseudogene of unknown protein                                                             |
| A_84_P260410 | 1.413475 | AT1G78450.1 | SOUL heme-binding family protein                                                          |
| A_84_P17161  | 1.413542 | AT1G52750.1 | hydrolase, alpha/beta fold family protein                                                 |
| A_84_P22693  | 1.415908 | AT1G69040.1 | ACR4 (ACT REPEAT 4); amino acid binding                                                   |
| A_84_P807259 | 1.41613  | AT5G67300.1 | ATMYB44/ATMYBR1/MYBR1 (MYB DOMAIN PROTEIN 44); DNA binding / transcription factor         |
| A_84_P295294 | 1.416309 | AT2G36050.1 | ATOFFP15/OFP15 (Arabidopsis thaliana ovate family protein 15)                             |
| A_84_P20587  | 1.417304 | AT5G15150.1 | ATHB-3 (ARABIDOPSIS THALIANA HOMEODOMAIN PROTEIN 3); DNA binding / transcription factor   |
| A_84_P814710 | 1.418316 | AT1G14870.1 | Identical to Uncharacterized protein At1g14870 [Arabidopsis Thaliana] (GB:Q9LQU4)         |
| A_84_P754822 | 1.420111 | AT1G10657.3 | similar to unknown protein [Arabidopsis thaliana] (TAIR:AT3G55240.1)                      |
| A_84_P831728 | 1.420273 | AT5G17220.1 | ATGSTF12 (GLUTATHIONE S-TRANSFERASE 26); glutathione transferase                          |
| A_84_P10002  | 1.420879 | AT4G04810.1 | methionine sulfoxide reductase domain-containing protein / SeIR domain-containing protein |
| A_84_P20376  | 1.422068 | AT3G61970.1 | NGA2 (NGATHA2); transcription factor                                                      |
| A_84_P18414  | 1.422508 | AT1G02610.1 | zinc finger (C3HC4-type RING finger) family protein                                       |
| A_84_P17028  | 1.42275  | AT1G62560.1 | flavin-containing monooxygenase family protein / FMO family protein                       |
| A_84_P566091 | 1.422784 | AT3G44440.1 | unknown protein                                                                           |
| A_84_P283560 | 1.424596 | AT2G24600.1 | ankyrin repeat family protein                                                             |
| A_84_P21330  | 1.425654 | AT3G44900.1 | ATCHX4 (CATION/H+ EXCHANGER 4); monovalent cation:proton antiporter                       |
| A_84_P755370 | 1.425814 | AT2G15120.1 | pseudogene, disease-resistance family protein / fatty acid elongase-related               |
| A_84_P15159  | 1.428555 | AT1G70090.1 | GATL9/LGT8 (Galacturonosyltransferase-like 9)                                             |
| A_84_P23217  | 1.429908 | AT3G62720.1 | ATXT1; UDP-xylosyltransferase/ transferase/ transferase, transferring glycosyl groups     |
| A_84_P13202  | 1.432225 | AT2G17040.1 | ANAC036 (Arabidopsis NAC domain containing protein 36); transcription factor              |
| A_84_P268870 | 1.432985 | AT2G35710.1 | glycogenin glucosyltransferase (glycogenin)-related                                       |
| A_84_P23654  | 1.434812 | AT1G52000.1 | jacalin lectin family protein                                                             |
| A_84_P767643 | 1.435441 | AT5G28176.1 | transposable element gene                                                                 |
| A_84_P22522  | 1.439217 | AT5G39020.1 | protein kinase family protein                                                             |
| A_84_P22256  | 1.441242 | AT3G58990.1 | aconitase C-terminal domain-containing protein                                            |

|              |          |             |                                                                                     |
|--------------|----------|-------------|-------------------------------------------------------------------------------------|
| A_84_P575998 | 1.441678 | AT4G14365.1 | zinc finger (C3HC4-type RING finger) family protein / ankyrin repeat family protein |
| A_84_P750195 | 1.442002 | AT1G73550.1 | lipid binding                                                                       |
| A_84_P547046 | 1.442314 | AT5G41315.1 | GL3 (GLABRA 3); transcription factor                                                |
| A_84_P852482 | 1.444655 | AT3G05660.1 | kinase/ protein binding                                                             |
| A_84_P21194  | 1.445339 | AT3G23240.1 | ATERF1/ERF1 (ETHYLENE RESPONSE FACTOR 1)                                            |
| A_84_P852060 | 1.445392 | AT1G19770.1 | ATPUP14 (Arabidopsis thaliana purine permease 14); purine transmembrane transporter |
| A_84_P23342  | 1.446501 | AT4G34950.1 | nodulin family protein                                                              |
| A_84_P732491 | 1.448148 | AT5G03995.1 | unknown protein                                                                     |
| A_84_P292144 | 1.454955 | AT3G23550.1 | MATE efflux family protein                                                          |
| A_84_P174931 | 1.455741 | AT5G22940.1 | exostosin family protein                                                            |
| A_84_P23439  | 1.455962 | AT5G23350.1 | GRAM domain-containing protein / ABA-responsive protein-related                     |
| A_84_P151158 | 1.457527 | AT5G56550.1 | similar to unknown protein [Arabidopsis thaliana] (TAIR:AT4G26288.1)                |
| A_84_P22089  | 1.458332 | AT3G02310.1 | SEP2 (SEPALLATA2); DNA binding / transcription factor                               |
| A_84_P224809 | 1.460357 | AT2G38790.1 | unknown protein                                                                     |
| A_84_P10831  | 1.462118 | AT3G25600.1 | calmodulin, putative                                                                |
| A_84_P185924 | 1.462231 | AT5G19340.1 | similar to unknown protein [Arabidopsis thaliana] (TAIR:AT3G05980.1)                |
| A_84_P563858 | 1.466002 | AT4G38340.1 | RWP-RK domain-containing protein                                                    |
| A_84_P15762  | 1.466974 | AT4G31910.1 | transferase family protein                                                          |
| A_84_P813219 | 1.467391 | AT3G54810.1 | BME3/BME3-ZF (BLUE MICROPYLAR END3); transcription factor                           |
| A_84_P17607  | 1.469429 | AT4G21380.1 | ARK3 (Arabidopsis Receptor Kinase 3); kinase                                        |
| A_84_P24042  | 1.47133  | AT3G26210.1 | CYP71B23 (cytochrome P450, family 71, subfamily B, polypeptide 23); oxygen binding  |
| A_84_P10209  | 1.473205 | AT5G25930.1 | leucine-rich repeat family protein / protein kinase family protein                  |
| A_84_P296824 | 1.48119  | AT3G15450.1 | similar to unknown protein [Arabidopsis thaliana] (TAIR:AT4G27450.1)                |
| A_84_P93089  | 1.481777 | AT1G13650.1 | similar to 18S pre-ribosomal assembly protein gar2-related [Arabidopsis thaliana]   |
| A_84_P14202  | 1.482282 | AT1G60540.1 | pseudogene of the dynamin family                                                    |
| A_84_P20714  | 1.483917 | AT5G61440.1 | thioredoxin family protein                                                          |
| A_84_P17683  | 1.484073 | AT4G39580.1 | kelch repeat-containing F-box family protein                                        |
| A_84_P755231 | 1.48782  | AT2G14270.1 | pseudogene, protein phosphatase 2C                                                  |
| A_84_P15831  | 1.491257 | AT5G07000.1 | sulfotransferase family protein                                                     |
| A_84_P229609 | 1.493723 | AT4G01950.1 | ATGPAT3/GPAT3 (GLYCEROL-3-PHOSPHATE ACYLTRANSFERASE 3); acyltransferase             |
| A_84_P824563 | 1.49622  | AT4G12030.1 | bile acid:sodium symporter family protein                                           |
| A_84_P824370 | 1.499437 | AT5G59080.1 | similar to unknown protein [Arabidopsis thaliana] (TAIR:AT5G02020.1)                |

|              |          |             |                                                                                     |
|--------------|----------|-------------|-------------------------------------------------------------------------------------|
| A_84_P15864  | 1.50332  | AT5G18470.1 | curculin-like (mannose-binding) lectin family protein                               |
| A_84_P18907  | 1.505637 | AT1G02360.1 | chitinase, putative                                                                 |
| A_84_P96816  | 1.507639 | AT4G25760.1 | ATGDU2 (ARABIDOPSIS THALIANA GLUTAMINE DUMPER 2)                                    |
| A_84_P57140  | 1.507698 | AT4G02540.1 | DC1 domain-containing protein                                                       |
| A_84_P765683 | 1.510439 | AT4G23215.1 | pseudogene of cysteine-rich receptor-like protein kinase family protein             |
| A_84_P768732 | 1.511531 | AT5G60022.1 | other RNA                                                                           |
| A_84_P11538  | 1.513243 | AT1G31490.1 | transferase family protein                                                          |
| A_84_P17866  | 1.514144 | AT1G01680.1 | U-box domain-containing protein                                                     |
| A_84_P175171 | 1.519813 | AT5G51550.1 | phosphate-responsive 1 family protein                                               |
| A_84_P19584  | 1.525793 | AT4G15975.1 | zinc finger (C3HC4-type RING finger) family protein                                 |
| A_84_P13216  | 1.53051  | AT1G20510.1 | OPCL1 (OPC-8:0 COA LIGASE1); 4-coumarate-CoA ligase                                 |
| A_84_P762464 | 1.531467 | AT3G25795.1 | other RNA                                                                           |
| A_84_P584025 | 1.531704 | AT4G08555.1 | unknown protein                                                                     |
| A_84_P768781 | 1.533677 | AT5G44568.1 | unknown protein                                                                     |
| A_84_P803551 | 1.534906 | AT5G54160.1 | ATOMT1 (O-METHYLTRANSFERASE 1)                                                      |
| A_84_P810288 | 1.536587 | AT3G56880.1 | VQ motif-containing protein                                                         |
| A_84_P97436  | 1.543627 | AT5G63480.1 | similar to unknown [Populus trichocarpa] (GB:ABK95190.1)                            |
| A_84_P17045  | 1.544024 | AT1G08630.1 | THA1 (THREONINE ALDOLASE 1); aldehyde-lyase/ threonine aldolase                     |
| A_84_P54170  | 1.545117 | AT3G57450.1 | similar to unnamed protein product [Vitis vinifera] (GB:CAO40798.1)                 |
| A_84_P11530  | 1.546707 | AT1G78370.1 | ATGSTU20 (Arabidopsis thaliana Glutathione S-transferase (class tau) 20)            |
| A_84_P12570  | 1.547717 | AT2G28120.1 | nodulin family protein                                                              |
| A_84_P21212  | 1.547746 | AT3G16530.1 | legume lectin family protein                                                        |
| A_84_P117852 | 1.547875 | AT1G02380.1 | similar to unknown protein [Arabidopsis thaliana] (TAIR:AT4G01960.1)                |
| A_84_P118462 | 1.551971 | AT2G28400.1 | similar to unknown protein [Arabidopsis thaliana] (TAIR:AT5G60680.1)                |
| A_84_P22412  | 1.552459 | AT4G39410.1 | WRKY13 (WRKY DNA-binding protein 13); transcription factor                          |
| A_84_P23696  | 1.555541 | AT1G60390.1 | BURP domain-containing protein / polygalacturonase, putative                        |
| A_84_P16124  | 1.556236 | AT1G03300.1 | agenet domain-containing protein                                                    |
| A_84_P12128  | 1.557288 | AT5G41160.1 | ATPUP12 (Arabidopsis thaliana purine permease 12); purine transmembrane transporter |
| A_84_P503731 | 1.557487 | AT1G54575.1 | unknown protein                                                                     |
| A_84_P11918  | 1.563151 | AT4G13410.1 | ATCSLA15 (Cellulose synthase-like A15); transferase, transferring glycosyl groups   |
| A_84_P52560  | 1.566782 | AT3G13000.1 | transcription factor                                                                |
| A_84_P755281 | 1.569883 | AT2G05050.1 | pseudogene, protein phosphatase 2C                                                  |
| A_84_P245475 | 1.570594 | AT2G25460.1 | similar to unknown protein [Arabidopsis thaliana] (TAIR:AT5G04860.1)                |
| A_84_P761348 | 1.571639 | AT3G57930.2 | similar to unknown protein [Arabidopsis thaliana] (TAIR:AT2G42190.1)                |
| A_84_P214238 | 1.571928 | AT3G14550.1 | GGPS3 (GERANYLGERANYL PYROPHOSPHATE SYNTHASE 3);                                    |

|              |          |             |                                                                                       |
|--------------|----------|-------------|---------------------------------------------------------------------------------------|
| A_84_P13113  | 1.573378 | AT5G52050.1 | farnesyltranstransferase                                                              |
| A_84_P516715 | 1.577223 | AT5G15430.1 | MATE efflux protein-related                                                           |
| A_84_P149248 | 1.577231 | AT1G21120.1 | calmodulin-binding protein-related                                                    |
| A_84_P186444 | 1.584143 | AT1G63260.1 | O-methyltransferase, putative                                                         |
| A_84_P13338  | 1.588411 | AT1G18710.1 | TET10 (TETRASPANIN10)                                                                 |
| A_84_P12619  | 1.597605 | AT1G44800.1 | AtMYB47 (myb domain protein 47); DNA binding / transcription factor                   |
| A_84_P756195 | 1.597658 | AT2G04070.1 | nodulin MtN21 family protein [AT1G44800.1]                                            |
| A_84_P17556  | 1.599102 | AT4G02130.1 | transporter                                                                           |
|              |          |             | GATL6/LGT10; polygalacturonate 4-alpha-galacturonosyltransferase/transferase          |
| A_84_P785505 | 1.601048 | AT2G23810.1 | TET8 (TETRASPANIN8)                                                                   |
| A_84_P141359 | 1.604549 | AT2G24550.1 | similar to unknown protein [Arabidopsis thaliana] (TAIR:AT4G31510.1)                  |
| A_84_P10724  | 1.60513  | AT2G30020.1 | protein phosphatase 2C, putative / PP2C, putative                                     |
| A_84_P179084 | 1.60613  | AT5G35735.1 | auxin-responsive family protein                                                       |
| A_84_P10439  | 1.60807  | AT1G09080.1 | BIP3; ATP binding                                                                     |
| A_84_P14882  | 1.60843  | AT1G06620.1 | 2-oxoglutarate-dependent dioxygenase, putative                                        |
| A_84_P857687 | 1.608901 | AT1G73500.1 | ATMKK9 (Arabidopsis thaliana MAP kinase kinase 9); kinase                             |
| A_84_P11191  | 1.611294 | AT5G43620.1 | S-locus protein-related                                                               |
| A_84_P763252 | 1.618607 | AT4G21366.1 | S-locus protein kinase-related                                                        |
| A_84_P23100  | 1.619066 | AT3G15570.1 | phototropic-responsive NPH3 family protein                                            |
| A_84_P20921  | 1.619741 | AT1G77520.1 | O-methyltransferase family 2 protein                                                  |
| A_84_P812444 | 1.620196 | AT2G25450.1 | 2-oxoglutarate-dependent dioxygenase, putative                                        |
| A_84_P214628 | 1.621852 | AT5G52900.1 | similar to unnamed protein product [Vitis vinifera] (GB:CAO49548.1)                   |
| A_84_P790566 | 1.622561 | AT1G69900.1 | similar to unknown protein [Arabidopsis thaliana] (TAIR:AT1G27100.1)PR008999)         |
| A_84_P19619  | 1.63562  | AT5G07700.1 | MYB76 (myb domain protein 76); DNA binding / transcription factor                     |
| A_84_P247225 | 1.636348 | AT1G01130.1 | similar to unknown protein [Arabidopsis thaliana] (TAIR:AT5G47170.1)                  |
| A_84_P16846  | 1.63661  | AT5G38900.1 | DSBA oxidoreductase family protein [AT5G38900.1]                                      |
| A_84_P19074  | 1.644172 | AT1G18570.1 | MYB51 (MYB DOMAIN PROTEIN 51); DNA binding / transcription factor                     |
| A_84_P132645 | 1.646774 | AT2G20670.1 | similar to unknown protein [Arabidopsis thaliana] (TAIR:AT4G32480.1)                  |
| A_84_P819483 | 1.649904 | AT1G72920.1 | disease resistance protein (TIR-NBS class), putative [AT1G72920.1]                    |
| A_84_P13706  | 1.654518 | AT3G50140.1 | similar to unknown protein [Arabidopsis thaliana] (TAIR:AT3G50130.1)                  |
| A_84_P22489  | 1.656172 | AT5G22250.1 | CCR4-NOT transcription complex protein, putative                                      |
| A_84_P18737  | 1.660001 | AT5G38710.1 | proline oxidase, putative / osmotic stress-responsive proline dehydrogenase, putative |
| A_84_P15371  | 1.663116 | AT2G23290.1 | AtMYB70 (myb domain protein 70); DNA binding / transcription factor                   |

|              |          |             |                                                                                          |
|--------------|----------|-------------|------------------------------------------------------------------------------------------|
| A_84_P758173 | 1.668362 | AT2G30368.1 | unknown protein                                                                          |
| A_84_P13462  | 1.669497 | AT2G33580.1 | protein kinase family protein / peptidoglycan-binding LysM domain-containing protein     |
| A_84_P12056  | 1.670342 | AT5G08030.1 | glycerophosphoryl diester phosphodiesterase family protein                               |
| A_84_P124801 | 1.67178  | AT1G66180.1 | aspartyl protease family protein                                                         |
| A_84_P103346 | 1.67269  | AT1G74940.1 | senescence-associated protein-related                                                    |
| A_84_P18763  | 1.680491 | AT5G45820.1 | CIPK20 (CBL-INTERACTING PROTEIN KINASE 20); kinase                                       |
| A_84_P16894  | 1.683567 | AT5G51910.1 | TCP family transcription factor, putative                                                |
| A_84_P16037  | 1.684535 | AT1G56650.1 | PAP1 (PRODUCTION OF ANTHOCYANIN PIGMENT 1); DNA binding / transcription factor           |
| A_84_P11239  | 1.685865 | AT5G56840.1 | DNA-binding family protein                                                               |
| A_84_P827013 | 1.686929 | AT2G02950.1 | PKS1 (PHYTOCHROME KINASE SUBSTRATE 1)                                                    |
| A_84_P210768 | 1.686954 | AT5G19230.1 | Identical to Uncharacterized GPI-anchored protein At5g19230 precursor                    |
| A_84_P597566 | 1.687744 | AT5G24030.1 | SLAH3 (SLAC1 HOMOLOGUE 3); transporter                                                   |
| A_84_P555790 | 1.688685 | AT5G48657.2 | defense protein-related                                                                  |
| A_84_P16173  | 1.68957  | AT1G28480.1 | GRX480; thiol-disulfide exchange intermediate                                            |
| A_84_P237883 | 1.691731 | AT5G14200.1 | 3-isopropylmalate dehydrogenase, chloroplast, putative                                   |
| A_84_P18510  | 1.693226 | AT4G04490.1 | protein kinase family protein                                                            |
| A_84_P135175 | 1.693853 | AT5G52750.1 | heavy-metal-associated domain-containing protein                                         |
| A_84_P19568  | 1.694432 | AT4G38000.1 | Dof-type zinc finger domain-containing protein                                           |
| A_84_P571306 | 1.694495 | AT2G38500.1 | similar to DTA4 (DOWNSTREAM TARGET OF AGL15-4) [Arabidopsis thaliana] (TAIR:AT1G79760.1) |
| A_84_P15224  | 1.695857 | AT1G16130.1 | WAKL2 (WALL ASSOCIATED KINASE-LIKE 2); kinase                                            |
| A_84_P13900  | 1.696368 | AT4G39510.1 | CYP96A12 (cytochrome P450, family 96, subfamily A, polypeptide 12)                       |
| A_84_P16568  | 1.701985 | AT3G55840.1 | similar to unknown protein [Arabidopsis thaliana] (TAIR:AT2G40000.1)                     |
| A_84_P153638 | 1.705439 | AT3G59940.1 | kelch repeat-containing F-box family protein                                             |
| A_84_P223359 | 1.706285 | AT1G54000.1 | myrosinase-associated protein, putative                                                  |
| A_84_P762419 | 1.712443 | AT3G15518.1 | similar to hypothetical protein [Nicotiana benthamiana] (GB:BAF02554.1)                  |
| A_84_P12794  | 1.715411 | AT3G57460.1 | catalytic/ metal ion binding / metalloendopeptidase/ zinc ion binding                    |
| A_84_P19082  | 1.716689 | AT1G22190.1 | AP2 domain-containing transcription factor, putative                                     |
| A_84_P250315 | 1.724944 | AT2G18660.1 | EXLB3 (EXPANSIN-LIKE B3 PRECURSOR)                                                       |
| A_84_P15741  | 1.734    | AT4G27280.1 | calcium-binding EF hand family protein                                                   |
| A_84_P196694 | 1.734354 | AT5G44430.1 | PDF1.2c (plant defensin 1.2c)                                                            |
| A_84_P511815 | 1.7354   | AT2G18193.1 | AAA-type ATPase family protein                                                           |
| A_84_P19365  | 1.736918 | AT3G46600.1 | scarecrow transcription factor family protein                                            |
| A_84_P23404  | 1.738862 | AT5G07990.1 | TT7 (TRANSPARENT TESTA 7); flavonoid 3'-monooxygenase/ oxygen binding                    |

|              |          |             |                                                                                    |
|--------------|----------|-------------|------------------------------------------------------------------------------------|
| A_84_P868627 | 1.73942  | AT1G52400.1 | BGL1 (BETA-GLUCOSIDASE HOMOLOG 1); hydrolase, hydrolyzing O-glycosyl compounds     |
| A_84_P90919  | 1.741701 | AT3G61950.1 | basic helix-loop-helix (bHLH) family protein                                       |
| A_84_P19750  | 1.74196  | AT5G57320.1 | villin, putative                                                                   |
| A_84_P578094 | 1.74228  | AT3G23260.1 | F-box family protein                                                               |
| A_84_P14710  | 1.743067 | AT3G56710.1 | SIB1 (SIGMA FACTOR BINDING PROTEIN 1); binding                                     |
| A_84_P248365 | 1.745902 | AT4G37240.1 | similar to unknown protein [Arabidopsis thaliana] (TAIR:AT2G23690.1)               |
| A_84_P239215 | 1.752199 | AT2G26010.1 | PDF1.3 (plant defensin 1.3) [AT2G26010.1]                                          |
| A_84_P13987  | 1.752421 | AT5G25190.1 | ethylene-responsive element-binding protein, putative                              |
| A_84_P13913  | 1.752625 | AT1G19380.1 | similar to unknown protein [Arabidopsis thaliana] (TAIR:AT5G65650.1)               |
| A_84_P800917 | 1.760023 | AT2G17230.1 | phosphate-responsive 1 family protein                                              |
| A_84_P16877  | 1.768399 | AT5G47240.1 | ATNUDT8 (Arabidopsis thaliana Nudix hydrolase homolog 8); hydrolase                |
| A_84_P18859  | 1.769277 | AT5G28630.1 | glycine-rich protein                                                               |
| A_84_P11362  | 1.775511 | AT1G24530.1 | transducin family protein / WD-40 repeat family protein                            |
| A_84_P11058  | 1.776629 | AT4G37900.1 | glycine-rich protein                                                               |
| A_84_P724318 | 1.776999 | AT5G06865.2 | other RNA                                                                          |
| A_84_P19131  | 1.779873 | AT2G23910.1 | cinnamoyl-CoA reductase-related                                                    |
| A_84_P17597  | 1.784301 | AT4G18880.1 | AT-HSFA4A (Arabidopsis thaliana heat shock transcription factor A4A)               |
| A_84_P869273 | 1.788268 | AT3G44260.1 | CCR4-NOT transcription complex protein, putative [AT3G44260.1]                     |
| A_84_P596516 | 1.788634 | AT4G14450.1 | Identical to Uncharacterized protein At4g14450, chloroplast precursor              |
| A_84_P13831  | 1.794038 | AT4G23150.1 | protein kinase family protein                                                      |
| A_84_P19944  | 1.795101 | AT1G72910.1 | disease resistance protein (TIR-NBS class), putative                               |
| A_84_P206058 | 1.795532 | AT4G37290.1 | similar to unknown protein [Arabidopsis thaliana] (TAIR:AT2G23270.1)               |
| A_84_P606916 | 1.797042 | AT2G30890.1 | membrane protein, putative                                                         |
| A_84_P203538 | 1.797872 | AT2G15090.1 | fatty acid elongase, putative                                                      |
| A_84_P268090 | 1.80712  | AT2G01300.1 | similar to unknown protein [Arabidopsis thaliana] (TAIR:AT1G15010.1)               |
| A_84_P137619 | 1.80747  | AT5G54490.1 | PBP1 (PINOID-BINDING PROTEIN 1); calcium ion binding                               |
| A_84_P22675  | 1.81061  | AT1G30760.1 | FAD-binding domain-containing protein                                              |
| A_84_P611298 | 1.812439 | AT2G04515.1 | similar to unknown protein [Arabidopsis thaliana] (TAIR:AT2G04495.1)               |
| A_84_P78199  | 1.813978 | AT5G25240.1 | similar to NHL repeat-containing protein [Arabidopsis thaliana] (TAIR:AT5G14890.1) |
| A_84_P242895 | 1.822521 | AT1G66160.1 | U-box domain-containing protein                                                    |
| A_84_P609548 | 1.82335  | AT2G25200.1 | similar to unknown protein [Arabidopsis thaliana] (TAIR:AT5G11000.1)               |
| A_84_P15883  | 1.823402 | AT5G26920.1 | calmodulin binding [AT5G26920.1]                                                   |
| A_84_P16913  | 1.824531 | AT5G57550.1 | XTR3 (XYLOGLUCAN ENDOTRANSGLYCOSYLASE 3); hydrolase, acting on glycosyl bonds      |
| A_84_P10528  | 1.825586 | AT1G51800.1 | leucine-rich repeat protein kinase, putative                                       |

|              |          |             |                                                                                         |
|--------------|----------|-------------|-----------------------------------------------------------------------------------------|
| A_84_P11957  | 1.830358 | AT4G26540.1 | protein kinase family protein                                                           |
| A_84_P310613 | 1.831117 | AT2G26020.1 | PDF1.2b (plant defensin 1.2b)                                                           |
| A_84_P172941 | 1.832161 | AT2G18690.1 | similar to unknown protein [Arabidopsis thaliana] (TAIR:AT2G18680.1)                    |
| A_84_P10925  | 1.832224 | AT3G62950.1 | glutaredoxin family protein                                                             |
| A_84_P20210  | 1.833894 | AT3G03190.1 | ATGSTF11 (GLUTATHIONE S-TRANSFERASE F11); glutathione transferase                       |
| A_84_P22597  | 1.837597 | AT5G59550.1 | zinc finger (C3HC4-type RING finger) family protein                                     |
| A_84_P188254 | 1.838301 | AT4G23140.1 | CRK6 (CYSTEINE-RICH RLK 6); kinase                                                      |
| A_84_P18312  | 1.839812 | AT3G02020.1 | aspartate kinase, lysine-sensitive, putative                                            |
| A_84_P818437 | 1.841716 | AT5G42380.1 | CML37/CML39; calcium ion binding                                                        |
| A_84_P219668 | 1.844571 | AT3G04640.1 | glycine-rich protein                                                                    |
| A_84_P103716 | 1.84727  | AT5G03350.1 | legume lectin family protein                                                            |
| A_84_P279580 | 1.851962 | AT3G50800.1 | similar to unknown protein [Arabidopsis thaliana] (TAIR:AT5G66580.1)                    |
| A_84_P137009 | 1.85395  | AT5G44420.1 | PDF1.2 (Low-molecular-weight cysteine-rich 77)                                          |
| A_84_P789698 | 1.855756 | AT1G72416.1 | heat shock protein binding                                                              |
| A_84_P765839 | 1.864768 | AT4G38825.1 | similar to auxin-responsive protein, putative [Arabidopsis thaliana] (TAIR:AT5G18030.1) |
| A_84_P15868  | 1.865853 | AT5G22380.1 | ANAC090 (Arabidopsis NAC domain containing protein 90); transcription factor            |
| A_84_P110392 | 1.866931 | AT5G55450.1 | protease inhibitor/seed storage/lipid transfer protein (LTP) family protein             |
| A_84_P138279 | 1.868826 | AT1G58420.1 | similar to unknown protein [Arabidopsis thaliana] (TAIR:AT1G10140.1)                    |
| A_84_P18198  | 1.869673 | AT2G16660.1 | nodulin family protein [AT2G16660.1]                                                    |
| A_84_P294704 | 1.870155 | AT1G54010.1 | myrosinase-associated protein, putative                                                 |
| A_84_P311633 | 1.87505  | AT5G11070.1 | similar to unknown protein [Arabidopsis thaliana] (TAIR:AT5G35090.1)                    |
| A_84_P15376  | 1.875712 | AT2G43000.1 | ANAC042 (Arabidopsis NAC domain containing protein 42); transcription factor            |
| A_84_P14602  | 1.879197 | AT1G59590.1 | ZCF37                                                                                   |
| A_84_P860645 | 1.885711 | AT4G14370.1 | disease resistance protein (TIR-NBS-LRR class), putative                                |
| A_84_P787864 | 1.888598 | AT3G48640.1 | similar to unknown protein [Arabidopsis thaliana] (TAIR:AT5G66670.2)                    |
| A_84_P23270  | 1.893874 | AT4G18250.1 | receptor serine/threonine kinase, putative                                              |
| A_84_P59930  | 1.895763 | AT1G15150.1 | MATE efflux family protein                                                              |
| A_84_P242975 | 1.906282 | AT1G78410.1 | VQ motif-containing protein                                                             |
| A_84_P87559  | 1.920268 | AT1G66500.1 | zinc finger (C2H2-type) family protein                                                  |
| A_84_P12444  | 1.922078 | AT1G71030.1 | ATMYBL2 (Arabidopsis myb-like 2); DNA binding / transcription factor                    |
| A_84_P21959  | 1.930591 | AT2G21550.1 | bifunctional dihydrofolate reductase-thymidylate synthase, putative / DHFR-TS, putative |
| A_84_P10151  | 1.931044 | AT5G04530.1 | beta-ketoacyl-CoA synthase family protein                                               |



|              |          |             |                                                                                       |
|--------------|----------|-------------|---------------------------------------------------------------------------------------|
| A_84_P136725 | 1.932609 | AT5G36920.1 | similar to unknown protein [Arabidopsis thaliana] (TAIR:AT5G36925.1)                  |
| A_84_P23963  | 1.934079 | AT2G30040.1 | MAPKKK14 (Mitogen-activated protein kinase kinase kinase 14)                          |
| A_84_P799394 | 1.934094 | AT3G19680.1 | similar to unknown protein [Arabidopsis thaliana] (TAIR:AT1G50040.1)                  |
| A_84_P11135  | 1.936796 | AT5G17700.1 | MATE efflux family protein                                                            |
| A_84_P14864  | 1.940925 | AT4G37260.1 | AtMYB73/MYB73 (myb domain protein 73)                                                 |
| A_84_P231939 | 1.942636 | AT1G61800.1 | GPT2 (glucose-6-phosphate/phosphate translocator 2)                                   |
| A_84_P146938 | 1.948567 | AT1G02450.1 | NIMIN-1/NIMIN1; protein binding                                                       |
| A_84_P16475  | 1.949289 | AT3G26290.1 | CYP71B26 (cytochrome P450, family 71, subfamily B, polypeptide 26);<br>oxygen binding |
| A_84_P784686 | 1.951712 | AT5G23010.1 | MAM1 (2-isopropylmalate synthase 3); 2-isopropylmalate synthase                       |
| A_84_P14954  | 1.953957 | AT1G73600.1 | phosphoethanolamine N-methyltransferase                                               |
| A_84_P13733  | 1.955104 | AT3G55980.1 | zinc finger (CCCH-type) family protein                                                |
| A_84_P21007  | 1.957317 | AT2G43570.1 | chitinase, putative                                                                   |
| A_84_P573393 | 1.960385 | AT4G27654.1 | unknown protein                                                                       |
| A_84_P16247  | 1.963718 | AT1G12610.1 | DDF1 (DWARF AND DELAYED FLOWERING 1); DNA binding /<br>transcription factor           |
| A_84_P193424 | 1.976771 | AT1G19180.1 | JAZ1/TIFY10A (JASMONATE-ZIM-DOMAIN PROTEIN 1); protein<br>binding                     |
| A_84_P22017  | 1.977014 | AT2G28790.1 | osmotin-like protein, putative                                                        |
| A_84_P186924 | 1.982606 | AT1G65790.1 | ARK1 (A. THALIANA RECEPTOR KINASE I); kinase                                          |
| A_84_P606215 | 1.989636 | AT3G50470.1 | HR3 (HOMOLOG OF RPW8 3)                                                               |
| A_84_P97476  | 1.995244 | AT5G24780.1 | VSP1 (VEGETATIVE STORAGE PROTEIN 1); acid phosphatase                                 |
| A_84_P14423  | 1.997156 | AT2G43100.1 | aconitase C-terminal domain-containing protein                                        |
| A_84_P287800 | 1.997518 | AT2G44130.1 | kelch repeat-containing F-box family protein                                          |
| A_84_P12564  | 1.998271 | AT2G44500.1 | similar to unknown protein [Arabidopsis thaliana] (TAIR:AT3G07900.1)                  |
| A_84_P533868 | 2.001669 | AT1G49000.1 | similar to unknown protein [Arabidopsis thaliana] (TAIR:AT3G18560.1)                  |
| A_84_P98796  | 2.005239 | AT2G46330.1 | AGP16 (ARABINO GALACTAN PROTEIN 16)                                                   |
| A_84_P22673  | 2.017921 | AT2G40435.1 | transcription regulator                                                               |
| A_84_P90469  | 2.017951 | AT1G16410.1 | CYP79F1 (SUPERSHOOT 1)                                                                |
| A_84_P22782  | 2.022638 | AT1G72950.1 | disease resistance protein (TIR-NBS class), putative                                  |
| A_84_P17158  | 2.025354 | AT1G74490.1 | protein kinase, putative                                                              |
| A_84_P22691  | 2.029295 | AT1G33770.1 | protein kinase family protein                                                         |
| A_84_P828978 | 2.036866 | AT3G45960.2 | ATEXLA3 (ARABIDOPSIS THALIANA EXPANSIN-LIKE A3)                                       |
| A_84_P15635  | 2.038529 | AT3G59080.1 | aspartyl protease family protein                                                      |
| A_84_P13130  | 2.039347 | AT5G57220.1 | CYP81F2 (cytochrome P450, family 81, subfamily F, polypeptide 2);<br>oxygen binding   |
| A_84_P68194  | 2.050077 | AT5G46710.1 | zinc-binding family protein                                                           |

|              |          |             |                                                                                           |
|--------------|----------|-------------|-------------------------------------------------------------------------------------------|
| A_84_P763290 | 2.050138 | AT4G23810.1 | WRKY53 (WRKY DNA-binding protein 53)                                                      |
| A_84_P20180  | 2.051508 | AT2G32030.1 | GCN5-related N-acetyltransferase (GNAT) family protein                                    |
| A_84_P24106  | 2.054772 | AT3G49380.1 | IQD15 (IQ-domain 15); calmodulin binding                                                  |
| A_84_P21229  | 2.054776 | AT3G21420.1 | oxidoreductase, 2OG-Fe(II) oxygenase family protein                                       |
| A_84_P20470  | 2.060411 | AT1G21910.1 | AP2 domain-containing transcription factor family protein                                 |
| A_84_P20535  | 2.075172 | AT4G17500.1 | ATERF-1 (ETHYLENE RESPONSIVE ELEMENT BINDING FACTOR 1)                                    |
| A_84_P15624  | 2.083783 | AT3G56220.1 | transcription regulator                                                                   |
| A_84_P17200  | 2.086029 | AT1G16110.1 | WAKL6 (WALL ASSOCIATED KINASE-LIKE 6)                                                     |
| A_84_P16735  | 2.098999 | AT4G39070.1 | zinc finger (B-box type) family protein                                                   |
| A_84_P113182 | 2.103191 | AT4G39670.1 | glycolipid binding / glycolipid transporter                                               |
| A_84_P595614 | 2.103629 | AT4G14390.1 | ankyrin repeat family protein                                                             |
| A_84_P280220 | 2.112713 | AT2G32210.1 | similar to unknown protein [Arabidopsis thaliana] (TAIR:AT2G32190.1)                      |
| A_84_P140849 | 2.113262 | AT1G32920.1 | similar to unknown protein [Arabidopsis thaliana] (TAIR:AT1G32928.1)                      |
| A_84_P22140  | 2.12183  | AT3G23250.1 | AtMYB15/AtY19/MYB15 (myb domain protein 15); DNA binding / transcription factor           |
| A_84_P110902 | 2.125362 | AT5G60680.1 | similar to unknown protein [Arabidopsis thaliana] (TAIR:AT3G45210.1)                      |
| A_84_P65864  | 2.130505 | AT1G18740.1 | similar to unknown protein [Arabidopsis thaliana] (TAIR:AT1G74450.1)                      |
| A_84_P14985  | 2.130739 | AT5G47220.1 | ATERF-2/ATERF2/ERF2 (ETHYLENE RESPONSE FACTOR 2)                                          |
| A_84_P68884  | 2.134681 | AT4G21840.1 | methionine sulfoxide reductase domain-containing protein / SelR domain-containing protein |
| A_84_P12970  | 2.136333 | AT4G17660.1 | protein kinase, putative                                                                  |
| A_84_P820417 | 2.137798 | AT4G17490.1 | ATERF6 (ETHYLENE RESPONSIVE ELEMENT BINDING FACTOR 6); DNA binding / transcription factor |
| A_84_P558829 | 2.142996 | AT2G29350.2 | SAG13 (Senescence-associated gene 13); oxidoreductase                                     |
| A_84_P16551  | 2.150633 | AT3G52400.1 | SYPI22 (syntaxin 122); SNAP receptor                                                      |
| A_84_P18040  | 2.150881 | AT1G11600.1 | CYP77B1 (cytochrome P450, family 77, subfamily B, polypeptide 1); oxygen binding          |
| A_84_P108832 | 2.155385 | AT3G06070.1 | similar to unknown protein [Arabidopsis thaliana] (TAIR:AT5G19190.1)                      |
| A_84_P785932 | 2.158657 | AT1G25400.1 | similar to unknown protein [Arabidopsis thaliana] (TAIR:AT1G68440.1)                      |
| A_84_P208818 | 2.168032 | AT1G53180.1 | similar to unknown protein [Arabidopsis thaliana] (TAIR:AT3G15115.1)                      |
| A_84_P602187 | 2.172813 | AT1G05575.1 | unknown protein                                                                           |
| A_84_P92059  | 2.173201 | AT5G67480.1 | BT4 (BTB AND TAZ DOMAIN PROTEIN 4); protein binding / transcription regulator             |
| A_84_P525034 | 2.181014 | AT1G62975.1 | basic helix-loop-helix (bHLH) family protein (bHLH125)                                    |
| A_84_P753779 | 2.184506 | AT1G61795.1 | similar to RIC10 (ROP-INTERACTIVE CRIB MOTIF-CONTAINING PROTEIN 10)                       |
| A_84_P806985 | 2.193118 | AT3G45970.1 | ATEXLA1 (ARABIDOPSIS THALIANA EXPANSIN-LIKE A1)                                           |

|              |          |             |                                                                                           |
|--------------|----------|-------------|-------------------------------------------------------------------------------------------|
| A_84_P788026 | 2.195382 | AT2G45480.1 | AtGRF9 (GROWTH-REGULATING FACTOR 9)                                                       |
| A_84_P522306 | 2.202943 | AT1G27820.1 | CCR4-NOT transcription complex protein, putative                                          |
| A_84_P290004 | 2.21431  | AT4G21850.1 | methionine sulfoxide reductase domain-containing protein / SeIR domain-containing protein |
| A_84_P22787  | 2.216765 | AT1G02920.1 | ATGSTF7 (GLUTATHIONE S-TRANSFERASE 11); glutathione transferase                           |
| A_84_P826034 | 2.219148 | AT3G52450.1 | U-box domain-containing protein                                                           |
| A_84_P23142  | 2.223119 | AT3G45260.1 | zinc finger (C2H2 type) family protein                                                    |
| A_84_P851624 | 2.228892 | AT4G11320.1 | cysteine proteinase, putative                                                             |
| A_84_P16574  | 2.244149 | AT3G57260.1 | BGL2 (PATHOGENESIS-RELATED PROTEIN 2)                                                     |
| A_84_P15628  | 2.253208 | AT3G57240.1 | BG3 (BETA-1,3-GLUCANASE 3); hydrolase, hydrolyzing O-glycosyl compounds                   |
| A_84_P11260  | 2.255993 | AT5G61610.1 | glycine-rich protein / oleosin                                                            |
| A_84_P11903  | 2.265142 | AT1G06160.1 | ethylene-responsive factor, putative                                                      |
| A_84_P17435  | 2.269613 | AT3G19710.1 | BCAT4 (BRANCHED-CHAIN AMINOTRANSFERASE4); catalytic/methionine-oxo-acid transaminase      |
| A_84_P306860 | 2.270527 | AT5G10695.1 | similar to unknown protein [Arabidopsis thaliana] (TAIR:AT5G57123.1)                      |
| A_84_P576883 | 2.278191 | AT4G11000.1 | ankyrin repeat family protein                                                             |
| A_84_P17582  | 2.286739 | AT4G11280.1 | ACS6 (1-AMINOCYCLOPROPANE-1-CARBOXYLIC ACID (ACC) SYNTHASE 6)                             |
| A_84_P289964 | 2.31706  | AT1G19020.1 | similar to unknown protein [Arabidopsis thaliana] (TAIR:AT3G48180.1)                      |
| A_84_P595350 | 2.317674 | AT2G32100.1 | ATOFP16/OFP16 (Arabidopsis thaliana ovate family protein 16) [                            |
| A_84_P16437  | 2.33633  | AT3G09870.1 | auxin-responsive family protein                                                           |
| A_84_P296724 | 2.337578 | AT5G51190.1 | AP2 domain-containing transcription factor, putative                                      |
| A_84_P162983 | 2.339678 | AT2G43010.1 | PIF4 (PHYTOCHROME INTERACTING FACTOR 4)                                                   |
| A_84_P584450 | 2.353725 | AT1G27890.1 | CCR4-NOT transcription complex protein, putative                                          |
| A_84_P15156  | 2.356978 | AT1G61470.1 | CCR4-NOT transcription complex protein, putative                                          |
| A_84_P542893 | 2.357788 | AT2G30230.1 | similar to unknown protein [Arabidopsis thaliana] (TAIR:AT1G06980.1)                      |
| A_84_P500133 | 2.370717 | AT1G42980.1 | formin homology 2 domain-containing protein / FH2 domain-containing protein               |
| A_84_P19362  | 2.376273 | AT3G46090.1 | ZAT7; nucleic acid binding / transcription factor/ zinc ion binding                       |
| A_84_P15691  | 2.386053 | AT4G11460.1 | protein kinase family protein                                                             |
| A_84_P16799  | 2.392547 | AT1G18300.1 | ATNUDT4 (Arabidopsis thaliana Nudix hydrolase homolog 4); hydrolase                       |
| A_84_P20325  | 2.425035 | AT3G50060.1 | MYB77; DNA binding / transcription factor                                                 |
| A_84_P812454 | 2.430124 | AT1G02930.1 | ATGSTF6 (EARLY RESPONSIVE TO DEHYDRATION 11); glutathione transferase                     |
| A_84_P21423  | 2.433149 | AT4G28680.1 | tyrosine decarboxylase, putative                                                          |

|              |          |             |                                                                                     |
|--------------|----------|-------------|-------------------------------------------------------------------------------------|
| A_84_P171073 | 2.437753 | AT1G35210.1 | similar to unknown protein [Arabidopsis thaliana]                                   |
| A_84_P823733 | 2.442802 | AT3G28340.1 | GATL10 (Galacturonosyltransferase-like 10)                                          |
| A_84_P246705 | 2.453548 | AT3G53980.1 | protease inhibitor/seed storage/lipid transfer protein (LTP) family protein         |
| A_84_P21874  | 2.457069 | AT1G27730.1 | STZ (SALT TOLERANCE ZINC FINGER)                                                    |
| A_84_P19294  | 2.47744  | AT1G26380.1 | FAD-binding domain-containing protein                                               |
| A_84_P21458  | 2.484427 | AT4G37610.1 | BT5 (BTB and TAZ domain protein 5); protein binding / transcription regulator       |
| A_84_P10906  | 2.486049 | AT3G58120.1 | bZIP transcription factor family protein                                            |
| A_84_P17343  | 2.486081 | AT2G44840.1 | ATERF13/EREBP (ETHYLENE-RESPONSIVE ELEMENT BINDING FACTOR 13)                       |
| A_84_P18029  | 2.50607  | AT1G10550.1 | XTH33 (xyloglucan:xyloglucosyl transferase 33); hydrolase, acting on glycosyl bonds |
| A_84_P13393  | 2.507669 | AT1G66090.1 | disease resistance protein (TIR-NBS class), putative                                |
| A_84_P23779  | 2.510022 | AT1G68520.1 | zinc finger (B-box type) family protein                                             |
| A_84_P21946  | 2.510692 | AT1G73540.1 | ATNUDT21 (Arabidopsis thaliana Nudix hydrolase homolog 21); hydrolase               |
| A_84_P286390 | 2.517204 | AT3G25780.1 | AOC3 (ALLENE OXIDE CYCLASE 3)                                                       |
| A_84_P612355 | 2.518229 | AT3G13600.1 | calmodulin-binding family protein                                                   |
| A_84_P21265  | 2.520662 | AT3G48700.1 | ATCXE13; hydrolase                                                                  |
| A_84_P22607  | 2.526904 | AT5G61600.1 | ethylene-responsive element-binding family protein                                  |
| A_84_P19456  | 2.530681 | AT4G04500.1 | protein kinase family protein                                                       |
| A_84_P18522  | 2.546749 | AT4G09820.1 | TT8 (TRANSPARENT TESTA 8); DNA binding / transcription factor                       |
| A_84_P14560  | 2.552286 | AT3G26830.1 | PAD3 (PHYTOALEXIN DEFICIENT 3); oxygen binding                                      |
| A_84_P307510 | 2.552661 | AT4G08040.1 | ACS11 (1-Amino-cyclopropane-1-carboxylate synthase 11)                              |
| A_84_P225559 | 2.553282 | AT5G64810.1 | WRKY51 (WRKY DNA-binding protein 51); transcription factor                          |
| A_84_P611334 | 2.558612 | AT2G22880.1 | VQ motif-containing protein                                                         |
| A_84_P821416 | 2.566483 | AT1G68840.1 | RAV2 (REGULATOR OF THE ATPASE OF THE VACUOLAR MEMBRANE)                             |
| A_84_P15388  | 2.571774 | AT2G29300.1 | tropinone reductase, putative / tropine dehydrogenase, putative                     |
| A_84_P18416  | 2.580279 | AT3G46080.1 | zinc finger (C2H2 type) family protein                                              |
| A_84_P592168 | 2.58546  | AT5G05300.1 | similar to unknown protein [Arabidopsis thaliana] (TAIR:AT3G10930.1)                |
| A_84_P12851  | 2.596052 | AT4G10500.1 | oxidoreductase, 2OG-Fe(II) oxygenase family protein                                 |
| A_84_P512655 | 2.60004  | AT1G77640.1 | AP2 domain-containing transcription factor, putative                                |
| A_84_P131376 | 2.626358 | AT5G19190.1 | similar to unknown protein [Arabidopsis thaliana] (TAIR:AT3G06070.1)                |
| A_84_P17650  | 2.637976 | AT4G31020.1 | similar to unknown protein [Arabidopsis thaliana] (TAIR:AT2G24320.1)                |
| A_84_P18566  | 2.643795 | AT4G24570.1 | mitochondrial substrate carrier family protein                                      |
| A_84_P66214  | 2.647632 | AT3G02840.1 | immediate-early fungal elicitor family protein                                      |
| A_84_P21931  | 2.655095 | AT1G28370.1 | ATERF11/ERF11 (ERF domain protein 11)                                               |

|              |          |             |                                                                                        |
|--------------|----------|-------------|----------------------------------------------------------------------------------------|
| A_84_P10518  | 2.656255 | AT1G50040.1 | similar to unknown protein [Arabidopsis thaliana] (TAIR:AT3G19680.1)                   |
| A_84_P16923  | 2.675428 | AT5G59820.1 | RHL41 (RESPONSIVE TO HIGH LIGHT 41)                                                    |
| A_84_P15734  | 2.675753 | AT4G25810.1 | XTR6 (XYLOGLUCAN ENDOTRANSGLYCOSYLASE 6); hydrolase, acting on glycosyl bonds          |
| A_84_P11360  | 2.69681  | AT1G52040.1 | MBP1 (MYROSINASE-BINDING PROTEIN 1) [AT1G52040.1]                                      |
| A_84_P810559 | 2.71723  | AT2G40000.1 | similar to unknown protein [Arabidopsis thaliana] (TAIR:AT3G55840.1)                   |
| A_84_P610481 | 2.71762  | AT2G34600.1 | JAZ7/TIFY5B (JASMONATE-ZIM-DOMAIN PROTEIN 7)                                           |
| A_84_P24081  | 2.727848 | AT1G02800.1 | ATCEL2 (Arabidopsis thaliana Cellulase 2); hydrolase, hydrolyzing O-glycosyl compounds |
| A_84_P14331  | 2.739227 | AT1G76650.1 | CML38; calcium ion binding                                                             |
| A_84_P831354 | 2.783521 | AT4G17470.1 | palmitoyl protein thioesterase family protein                                          |
| A_84_P811894 | 2.838198 | AT4G08950.1 | phosphate-responsive protein, putative (EXO)                                           |
| A_84_P15931  | 2.843934 | AT5G47230.1 | ERF5 (ETHYLENE RESPONSIVE ELEMENT BINDING FACTOR 5)                                    |
| A_84_P10609  | 2.882393 | AT2G24850.1 | TAT3 (TYROSINE AMINOTRANSFERASE 3); transaminase                                       |
| A_84_P560603 | 2.954511 | AT2G24700.1 | transcriptional factor B3 family protein                                               |
| A_84_P206968 | 2.972433 | AT1G57990.1 | ATPUP18 (Arabidopsis thaliana purine permease 18); purine transmembrane transporter    |
| A_84_P576622 | 2.978411 | AT2G32200.1 | similar to unknown protein [Arabidopsis thaliana] (TAIR:AT2G32210.1)                   |
| A_84_P217688 | 2.980451 | AT1G76600.1 | similar to unknown protein [Arabidopsis thaliana] (TAIR:AT1G21010.1)                   |
| A_84_P784866 | 2.992989 | AT1G15550.1 | GA4 (GA REQUIRING 4); gibberellin 3-beta-dioxygenase                                   |
| A_84_P19516  | 2.998845 | AT4G25470.1 | CBF2 (FREEZING TOLERANCE QTL 4)                                                        |
| A_84_P21341  | 3.00006  | AT4G02330.1 | ATPMEPCRB; pectinesterase [AT4G02330.1]                                                |
| A_84_P50100  | 3.007904 | AT3G55240.1 | Overexpression leads to PEL (Pseudo-Etiolation in Light) phenotype.                    |
| A_84_P786760 | 3.027953 | AT1G80840.1 | WRKY40 (WRKY DNA-binding protein 40); transcription factor                             |
| A_84_P156125 | 3.068035 | AT3G61190.1 | BAP1 (BON ASSOCIATION PROTEIN 1)                                                       |
| A_84_P831396 | 3.079057 | AT1G20310.1 | similar to unknown protein [Arabidopsis thaliana] (TAIR:AT1G76070.1)                   |
| A_84_P22843  | 3.106312 | AT1G76790.1 | O-methyltransferase family 2 protein                                                   |
| A_84_P13235  | 3.132449 | AT1G13260.1 | RAV1 (Related to ABI3/VP1 1); DNA binding / transcription factor                       |
| A_84_P11046  | 3.152803 | AT4G34410.1 | AP2 domain-containing transcription factor, putative                                   |
| A_84_P23070  | 3.159794 | AT3G22740.1 | HMT3 (Homocysteine S-methyltransferase 3); homocysteine S-methyltransferase            |
| A_84_P13657  | 3.180254 | AT3G29590.1 | AT5MAT; O-malonyltransferase/ transferase                                              |
| A_84_P751510 | 3.189359 | AT1G30390.1 | transposable element gene                                                              |
| A_84_P598642 | 3.19097  | AT1G07135.1 | glycine-rich protein                                                                   |
| A_84_P825767 | 3.194445 | AT1G56240.1 | ATPP2-B13 (Phloem protein 2-B13); carbohydrate binding                                 |
| A_84_P13057  | 3.224714 | AT5G36910.1 | THI2.2 (THIONIN 2.2); toxin receptor binding                                           |
| A_84_P102986 | 3.276431 | AT2G27080.1 | harpin-induced protein-related / HIN1-related / harpin-responsive                      |

|              |          |             |                                                                                              |
|--------------|----------|-------------|----------------------------------------------------------------------------------------------|
| A_84_P16901  | 3.303542 | AT5G54060.1 | protein-related<br>UF3GT (UDP-GLUCOSE:FLAVONOID<br>3-O-GLUCOSYLTRANSFERASE)                  |
| A_84_P12143  | 3.314709 | AT5G45340.1 | CYP707A3 (cytochrome P450, family 707, subfamily A, polypeptide 3);<br>oxygen binding        |
| A_84_P196584 | 3.327337 | AT3G48650.1 | pseudogene, At14a-related protein, ( <i>Arabidopsis thaliana</i> ) [AT3G48650.1]             |
| A_84_P715787 | 3.372662 | AT1G32928.1 | similar to unknown protein [ <i>Arabidopsis thaliana</i> ] (TAIR:AT1G32920.1)                |
| A_84_P23376  | 3.390786 | AT4G36880.1 | CP1 (CYSTEINE PROTEINASE1); cysteine-type peptidase                                          |
| A_84_P23485  | 3.475109 | AT5G43890.1 | SUPER1/YUCCA5 (SUPPRESSOR OF ER1); monooxygenase                                             |
| A_84_P17189  | 3.500325 | AT1G25560.1 | AP2 domain-containing transcription factor, putative                                         |
| A_84_P18388  | 3.552898 | AT3G26330.1 | CYP71B37 (cytochrome P450, family 71, subfamily B, polypeptide 37);<br>oxygen binding        |
| A_84_P709533 | 3.577951 | AT4G13395.1 | DVL10/RTFL12 (ROTUNDIFOLIA LIKE 12) [AT4G13395.1]                                            |
| A_84_P595805 | 3.57825  | AT5G36925.1 | similar to unknown protein [ <i>Arabidopsis thaliana</i> ] (TAIR:AT5G36920.1)                |
| A_84_P821712 | 3.588392 | AT1G35140.1 | PHI-1 (PHOSPHATE-INDUCED 1)                                                                  |
| A_84_P97916  | 3.658493 | AT4G29780.1 | similar to unknown protein [ <i>Arabidopsis thaliana</i> ] (TAIR:AT5G12010.1)                |
| A_84_P197194 | 3.725751 | AT4G22870.1 | leucoanthocyanidin dioxygenase, putative / anthocyanidin synthase, putative                  |
| A_84_P105796 | 3.871735 | AT2G06200.1 | AtGRF6 (GROWTH-REGULATING FACTOR 6)                                                          |
| A_84_P17859  | 3.89026  | AT5G57560.1 | TCH4 (TOUCH 4); hydrolase, acting on glycosyl bonds /<br>xyloglucan:xyloglucosyl transferase |
| A_84_P539348 | 3.909664 | AT2G25735.1 | unknown protein                                                                              |
| A_84_P12885  | 4.081889 | AT4G22880.1 | LDOX (TANNIN DEFICIENT SEED 4)                                                               |
| A_84_P21661  | 4.298098 | AT5G61590.1 | AP2 domain-containing transcription factor family protein                                    |
| A_84_P19028  | 4.365328 | AT1G74930.1 | ORA47; DNA binding / transcription factor                                                    |
| A_84_P17806  | 4.777354 | AT5G42800.1 | DFR (DIHYDROFLAVONOL 4-REDUCTASE); dihydrokaempferol<br>4-reductase                          |
| A_84_P534390 | 5.119865 | AT4G37740.1 | AtGRF2 (GROWTHREGULATING FACTOR 2)                                                           |

**Log2 Ratio means 35S-BnGRF2a-2 transgenic line vs WT**

**Table S2. Upregulated genes of 20 d ovules in zy036 compared with 51070.**

| ProbeName    | GeneName    | Log2 ratio | Gene Description                                                                 |
|--------------|-------------|------------|----------------------------------------------------------------------------------|
| A_84_P10028  | At1g17530.1 | 2.7338     | mitochondrial import inner membrane translocase subunit Tim17/Tim22/Tim23 family |
| A_84_P100516 | At4g22990.1 | 2.725001   | SPX (SYG1/Pho81/XPR1) domain-containing protein                                  |
| A_84_P10055  | At4g24240.1 | 2.812622   | WRKY family transcription factor contains Pfam profile                           |
| A_84_P10173  | At5g10880.1 | 37.449018  | tRNA synthetase-related / tRNA ligase-related                                    |
| A_84_P10178  | At5g12050.1 | 2.855884   | expressed protein                                                                |
| A_84_P10196  | At5g22300.1 | 3.729249   | nitrilase 4 (NIT4) identical to SP P46011 Nitrilase 4 (EC 3.5.5.1)               |
| A_84_P10263  | At5g48100.1 | 5.688817   | laccase family protein / diphenol oxidase family protein                         |
| A_84_P10267  | At5g49190.1 | 5.211319   | sucrose synthase / sucrose-UDP glucosyltransferase (SUS2)                        |
| A_84_P10294  | At5g57210.1 | 5.000275   | microtubule-associated protein-related                                           |
| A_84_P10321  | At5g63380.1 | 2.536783   | 4-coumarate--CoA ligase family protein / 4-coumaroyl-CoA synthase family protein |
| A_84_P103416 | At3g21215.1 | 3.14179    | RNA-binding protein, putative contains RNA recognition motif                     |
| A_84_P10361  | At5g09430.1 | 7.599952   | hydrolase, alpha/beta fold family protein                                        |
| A_84_P103806 | At5g21940.1 | 3.05733    | expressed protein supported by full length cDNA GI:22531282                      |
| A_84_P10400  | At1g69080.1 | 3.266962   | universal stress protein (USP) family protein                                    |
| A_84_P10407  | At1g23740.1 | 3.442976   | oxidoreductase, zinc-binding dehydrogenase family protein                        |
| A_84_P10442  | At1g80950.1 | 2.11123    | phospholipid/glycerol acyltransferase family protein                             |
| A_84_P10534  | At1g12230.1 | 5.576353   | transaldolase                                                                    |
| A_84_P106252 | At3g50890.1 | 3.2304     | zinc finger homeobox family protein / ZF-HD homeobox family protein              |
| A_84_P10732  | At2g33800.1 | 2.206417   | ribosomal protein S5 family protein                                              |
| A_84_P107652 | At2g38120.1 | 3.019156   | amino acid permease, putative (AUX1)                                             |
| A_84_P10771  | At3g06730.1 | 2.970563   | thioredoxin family protein                                                       |
| A_84_P107712 | At2g21100.1 | 4.599985   | disease resistance-responsive protein-related / dirigent protein-related         |
| A_84_P10773  | At3g22370.1 | 7.911115   | alternative oxidase 1a, mitochondrial (AOX1A)                                    |
| A_84_P10855  | At1g48420.1 | 2.400702   | desulfhydrase family                                                             |
| A_84_P10921  | At3g62030.1 | 2.942136   | peptidyl-prolyl cis-trans isomerase                                              |
| A_84_P10932  | At4g00430.1 | 3.181009   | plasma membrane intrinsic protein                                                |
| A_84_P10969  | At4g12390.1 | 7.600414   | invertase/pectin methylesterase inhibitor family protein                         |

|              |             |           |                                                                              |
|--------------|-------------|-----------|------------------------------------------------------------------------------|
| A_84_P109812 | At5g12900.1 | 2.417531  | expressed protein                                                            |
| A_84_P11008  | At4g25750.1 | 3.345736  | ABC transporter family protein                                               |
| A_84_P11024  | At4g29190.1 | 4.419798  | zinc finger (CCCH-type) family protein                                       |
| A_84_P11040  | At4g32880.1 | 3.69713   | homeobox-leucine zipper transcription factor (HB-8)                          |
| A_84_P11156  | At5g26170.1 | 14.374659 | WRKY family transcription factor DNA-binding protein, WRKY1 Avena sativa     |
| A_84_P11232  | At5g54810.1 | 5.775762  | tryptophan synthase, beta subunit 1 (TSB1)                                   |
| A_84_P11295  | At5g19960.1 | 6.147568  | RNA recognition motif (RRM)-containing protein                               |
| A_84_P11300  | At5g08380.1 | 4.042514  | alpha-galactosidase, putative melibiase,alpha-D-galactoside galactohydrolase |
| A_84_P11328  | At1g20470.1 | 9.674627  | auxin-responsive family protein                                              |
| A_84_P11343  | At1g02260.1 | 2.860895  | transmembrane protein, putative                                              |
| A_84_P11358  | At1g03820.1 | 2.272383  | expressed protein                                                            |
| A_84_P11451  | At1g78280.1 | 4.021656  | transcription factor jumonji (jmjC) domain-containing protein                |
| A_84_P11558  | At2g21660.1 | 2.679597  | glycine-rich RNA-binding protein (GRP7)                                      |
| A_84_P11608  | At2g29320.1 | 2.142075  | tropinone reductase, putative / tropine dehydrogenase                        |
| A_84_P11619  | At2g38970.1 | 2.625036  | zinc finger (C3HC4-type RING finger) family protein                          |
| A_84_P11652  | At1g07520.1 | 5.582934  | scarecrow transcription factor family protein                                |
| A_84_P11701  | At3g03050.1 | 2.482194  | cellulose synthase family protein (CslD3)                                    |
| A_84_P11703  | At3g04790.1 | 4.123323  | ribose 5-phosphate isomerase-related                                         |
| A_84_P11709  | At3g08590.1 | 3.67311   | 2,3-biphosphoglycerate-independent phosphoglycerate mutase                   |
| A_84_P11732  | At3g23610.1 | 3.516161  | dual specificity protein phosphatase (DsPTP1)                                |
| A_84_P11741  | At3g25160.1 | 2.199905  | ER lumen protein retaining receptor family protein                           |
| A_84_P11751  | At3g13810.1 | 2.747597  | zinc finger (C2H2 type) family protein                                       |
| A_84_P11781  | At3g11050.1 | 8.47371   | ferritin, putative                                                           |
| A_84_P117832 | At5g52780.1 | 5.292213  | expressed protein                                                            |
| A_84_P11811  | At3g48970.1 | 3.154104  | copper-binding family protein                                                |
| A_84_P11823  | At3g51600.1 | 2.414962  | nonspecific lipid transfer protein 5 (LTP5)                                  |
| A_84_P11842  | At3g55740.1 | 2.456867  | proline transporter 2 (ProT2)                                                |
| A_84_P118932 | At1g46264.1 | 3.014722  | heat shock transcription factor family protein                               |
| A_84_P11898  | At4g08360.1 | 15.081428 | KOW domain-containing protein                                                |
| A_84_P11966  | At4g28520.1 | 4.584473  | 12S seed storage protein, putative / cruciferin                              |
| A_84_P11994  | At4g34980.1 | 3.087907  | subtilase family protein                                                     |
| A_84_P12020  | At4g16160.1 | 2.467279  | mitochondrial import inner membrane translocase subunit Tim17/Tim22/Tim23    |



|              |                          |          |                                                                                      |
|--------------|--------------------------|----------|--------------------------------------------------------------------------------------|
| A_84_P12030  | At5g01100.1              | 3.58726  | family                                                                               |
| A_84_P12058  | At5g08640.1              | 2.264234 | expressed protein similar to axi 1 [ <i>Nicotiana tabacum</i> ] GI:559921            |
| A_84_P12088  | At5g22630.1              | 2.063082 | flavonol synthase 1 (FLS1) identical to SP Q96330                                    |
| A_84_P12093  | At5g24090.1              | 5.591822 | prephenate dehydratase family protein                                                |
| A_84_P12143  | At5g45340.1              | 2.525923 | acidic endochitinase (CHIB1)                                                         |
| A_84_P12153  | At5g47910.1              | 5.265487 | cytochrome P450 family protein                                                       |
| A_84_P12162  | At1g29680.1              | 10.63241 | respiratory burst oxidase protein D (RbohD) / NADPH oxidase                          |
| A_84_P12198  | At5g60200.1              | 2.615186 | expressed protein                                                                    |
| A_84_P12218  | At5g64870.1              | 5.956265 | Dof-type zinc finger domain-containing protein                                       |
| A_84_P12234  | At5g16030.1              | 5.41649  | expressed protein                                                                    |
| A_84_P12241  | At5g20230.1              | 2.013417 | expressed protein                                                                    |
| A_84_P12255  | At1g28110.1              | 2.417267 | plastocyanin-like domain-containing protein                                          |
| A_84_P12295  | At1g64450.1              | 2.574526 | serine carboxypeptidase S10 family protein                                           |
| A_84_P123122 | At1g58120.1              | 5.613149 | proline-rich family protein contains proline rich extensins                          |
| A_84_P12319  | At1g80710.1              | 4.866051 | expressed protein                                                                    |
| A_84_P12349  | At1g54830.1              | 5.481547 | transducin family protein / WD-40 repeat family protein contains 3 WD-40 repeats     |
| A_84_P12420  | At1g14730.1              | 3.223226 | CCAAT-box binding transcription factor Hap5a                                         |
| A_84_P12446  | At1g34430.1              | 2.607396 | cytochrome B561 family                                                               |
| A_84_P12451  | At1g72100.1              | 3.577193 | dihydrolipoamide S-acetyltransferase                                                 |
| A_84_P12487  | At1g14390.1              | 3.293766 | late embryogenesis LEA domain-containing protein                                     |
| A_84_P12506  | At2g31790.1              | 3.770011 | leucine-rich repeat transmembrane protein kinase                                     |
| A_84_P12517  | At2g16950.1              | 2.40705  | UDP-glucuronosyl/UDP-glucosyl transferase family protein                             |
| A_84_P12548  | CHR2:013065966-013065811 | 2.192464 | importin beta-2 subunit family protein                                               |
| A_84_P12562  | At2g02400.1              | 3.91043  | Unknown                                                                              |
| A_84_P12668  | At3g22790.1              | 2.640543 | cinnamoyl-CoA reductase family                                                       |
| A_84_P12672  | At3g15680.1              | 3.792189 | kinase interacting family protein                                                    |
| A_84_P126931 | At2g01505.1              | 2.498767 | zinc finger (Ran-binding) family protein                                             |
| A_84_P12713  | At3g19040.1              | 4.71958  | CLE16, putative CLAVATA3/ESR-Related 16 (CLE16)                                      |
| A_84_P12781  | At3g54400.1              | 3.512736 | ubiquitin family protein / DNA-binding bromodomain                                   |
| A_84_P12815  | At3g62760.1              | 2.612071 | aspartyl protease family protein                                                     |
| A_84_P12842  | At4g08150.1              | 3.452384 | glutathione S-transferase, putative Glutathione transferase III(b) - <i>Zea mays</i> |
|              |                          |          | homeobox protein knotted-1 like 1 (KNAT1)                                            |

|              |             |           |                                                                               |
|--------------|-------------|-----------|-------------------------------------------------------------------------------|
| A_84_P12966  | At4g16430.1 | 2.077201  | basic helix-loop-helix (bHLH) family protein                                  |
| A_84_P12971  | At4g36420.1 | 2.343886  | ribosomal protein L12 family protein                                          |
| A_84_P12987  | At5g04600.1 | 2.21091   | RNA recognition motif (RRM)-containing protein                                |
| A_84_P13014  | At5g12110.1 | 2.767378  | elongation factor 1B alpha-subunit 1 (eEF1Balpha1)                            |
| A_84_P13019  | At5g14220.1 | 2.381381  | protoporphyrinogen oxidase                                                    |
| A_84_P13046  | At5g26200.1 | 4.281696  | mitochondrial substrate carrier family protein contains Pfam profile          |
| A_84_P13077  | At5g42380.1 | 9.587546  | calmodulin-related protein                                                    |
| A_84_P13078  | At5g42650.1 | 3.416188  | allene oxide synthase/ hydroperoxide dehydrase / cytochrome P450 74A (CYP74A) |
| A_84_P13104  | At5g49520.1 | 6.736729  | WRKY family transcription factor                                              |
| A_84_P13247  | At1g62520.1 | 2.527287  | expressed protein                                                             |
| A_84_P13296  | At1g65260.1 | 3.240863  | PspA/IM30 family protein contains Pfam PF04012                                |
| A_84_P13297  | At1g79210.1 | 2.037224  | 20S proteasome alpha subunit B                                                |
| A_84_P13348  | At1g80300.1 | 2.356846  | chloroplast ADP, ATP carrier protein 1                                        |
| A_84_P13372  | At1g69840.1 | 2.741972  | band 7 family protein                                                         |
| A_84_P13400  | At1g18100.1 | 10.595503 | mother of FT and TF1 protein (MFT)                                            |
| A_84_P13448  | At2g25890.1 | 2.170593  | glycine-rich protein / oleosin                                                |
| A_84_P13459  | At1g64080.1 | 4.59014   | expressed protein                                                             |
| A_84_P13464  | At2g20800.1 | 10.533831 | pyridine nucleotide-disulphide oxidoreductase family protein                  |
| A_84_P13470  | At2g47890.1 | 6.333374  | zinc finger (B-box type) family protein                                       |
| A_84_P13585  | At1g01300.1 | 2.656881  | aspartyl protease family protein                                              |
| A_84_P13699  | At3g48550.1 | 4.516888  | expressed protein putative zinc-finger protein - Arabidopsis thaliana         |
| A_84_P13729  | At1g74160.1 | 2.673831  | expressed protein                                                             |
| A_84_P13733  | At3g55980.1 | 3.248403  | zinc finger (CCCH-type) family protein                                        |
| A_84_P13770  | At4g01130.1 | 2.424259  | acetyltransferase                                                             |
| A_84_P13829  | At4g22590.1 | 10.318732 | trehalose-6-phosphate phosphatase                                             |
| A_84_P13850  | At4g27260.1 | 7.496023  | auxin-responsive GH3 family protein                                           |
| A_84_P138519 | At3g27220.1 | 2.365602  | kelch repeat-containing protein                                               |
| A_84_P13882  | At4g34680.1 | 3.235422  | GATA transcription factor 3, putative (GATA-3)                                |
| A_84_P139809 | At3g48420.1 | 3.533157  | haloacid dehalogenase-like hydrolase family protein                           |
| A_84_P13987  | At5g25190.1 | 12.270094 | ethylene-responsive element-binding protein                                   |
| A_84_P14058  | At5g52100.1 | 9.241757  | dihydrodipicolinate reductase family protein                                  |

|              |             |           |                                                                                  |
|--------------|-------------|-----------|----------------------------------------------------------------------------------|
| A_84_P14060  | At5g52860.1 | 5.041014  | ABC transporter family protein                                                   |
| A_84_P14130  | At5g20060.1 | 2.039058  | phospholipase/carboxylesterase family protein                                    |
| A_84_P14137  | At5g13170.1 | 77.4379   | nodulin MtN3 family protein                                                      |
| A_84_P14250  | At1g03070.1 | 11.089436 | expressed protein                                                                |
| A_84_P14251  | At1g65720.1 | 2.539594  | expressed protein                                                                |
| A_84_P14288  | At1g53170.1 | 2.524199  | ethylene-responsive element-binding factor 8 / ERF transcription factor 8 (ERF8) |
| A_84_P142999 | At5g41560.1 | 2.257972  | expressed protein                                                                |
| A_84_P14317  | At1g69830.1 | 2.203901  | alpha-amylase, putative / 1,4-alpha-D-glucan glucohydrolase                      |
| A_84_P14320  | At1g74310.1 | 11.559649 | heat shock protein 101 (HSP101)                                                  |
| A_84_P14331  | At1g76650.1 | 4.030745  | calcium-binding EF hand family protein                                           |
| A_84_P143569 | At1g08320.1 | 2.926415  | bZIP family transcription factor contains Pfam profile                           |
| A_84_P144309 | At3g51100.1 | 14.1213   | expressed protein                                                                |
| A_84_P14448  | At2g34790.1 | 6.13371   | FAD-binding domain-containing protein                                            |
| A_84_P14467  | At2g36450.1 | 6.220557  | AP2 domain-containing protein                                                    |
| A_84_P14488  | At2g25620.1 | 4.033379  | protein phosphatase 2C, putative / PP2C                                          |
| A_84_P14510  | At2g03090.1 | 2.257506  | expansin, putative (EXP15)                                                       |
| A_84_P14538  | At3g04570.1 | 2.177624  | DNA-binding protein-related contains Pfam domain PF03479                         |
| A_84_P145439 | At2g31865.1 | 8.754734  | poly (ADP-ribose) glycohydrolase (PARG) family protein                           |
| A_84_P14585  | At3g16800.1 | 3.124084  | protein phosphatase 2C, putative / PP2C                                          |
| A_84_P14601  | At3g21090.1 | 2.923966  | ABC transporter family protein                                                   |
| A_84_P14606  | At3g22960.1 | 4.688758  | pyruvate kinase                                                                  |
| A_84_P14611  | At3g29320.1 | 3.52471   | glucan phosphorylase                                                             |
| A_84_P14620  | At3g52310.1 | 4.775621  | ABC transporter family protein                                                   |
| A_84_P146728 | At1g73805.1 | 21.260404 | calmodulin-binding protein                                                       |
| A_84_P14703  | TC266686    | 2.565888  | 00856 domain. [TC266686]                                                         |
| A_84_P14710  | At3g56710.1 | 2.897487  | sigA-binding protein                                                             |
| A_84_P14817  | At1g27100.1 | 2.239364  | expressed protein                                                                |
| A_84_P14954  | At1g73600.1 | 39.571579 | phosphoethanolamine N-methyltransferase 3                                        |
| A_84_P14985  | At5g47220.1 | 2.761372  | ethylene-responsive element-binding factor 2 (ERF2)                              |
| A_84_P15019  | TC264563    | 9.858359  | Q9FZG6 (Q9FZG6) T2E6.3, complete [TC264563]                                      |
| A_84_P15047  | At5g63410.1 | 2.880199  | leucine-rich repeat transmembrane protein kinase                                 |
| A_84_P15060  | At5g66570.1 | 2.322625  | chloroplast / 33 kDa subunit of oxygen evolving system of photosystem II         |

|              |                          |          |                                                                              |
|--------------|--------------------------|----------|------------------------------------------------------------------------------|
| A_84_P150708 | At1g28400.1              | 6.537415 | expressed protein similar to E6 (GI:1000090) [ <i>Gossypium barbadense</i> ] |
| A_84_P151538 | At1g66570.1              | 2.970468 | sucrose transporter, putative / sucrose-proton symporter                     |
| A_84_P15215  | At1g73050.1              | 2.470175 | (R)-mandelonitrile lyase, putative / (R)-oxynitrilase                        |
| A_84_P15273  | At1g68010.1              | 3.372899 | glycerate dehydrogenase / NADH-dependent hydroxypyruvate reductase           |
| A_84_P15278  | At1g80640.1              | 2.386222 | protein kinase family protein                                                |
| A_84_P15323  | At1g32240.1              | 2.442644 | myb family transcription factor (KAN2)                                       |
| A_84_P153815 | At5g62170.1              | 2.840922 | expressed protein various predicted proteins, <i>Arabidopsis thaliana</i>    |
| A_84_P15388  | At2g29300.1              | 2.544188 | tropinone reductase, putative / tropine dehydrogenase                        |
| A_84_P15406  | At2g30150.1              | 3.276796 | UDP-glucuronosyl/UDP-glucosyl transferase family protein                     |
| A_84_P15444  | At2g45850.1              | 2.988196 | DNA-binding family protein                                                   |
| A_84_P15451  | At1g44760.1              | 3.170434 | universal stress protein (USP) family protein                                |
| A_84_P154655 | At2g41730.1              | 6.154193 | expressed protein                                                            |
| A_84_P15519  | At3g17000.1              | 2.983021 | ubiquitin-conjugating enzyme                                                 |
| A_84_P15522  | At3g26730.1              | 2.177911 | zinc finger (C3HC4-type RING finger) family protein                          |
| A_84_P15540  | At1g12900.1              | 2.021983 | glyceraldehyde 3-phosphate dehydrogenase                                     |
| A_84_P15653  | At3g63470.1              | 2.636769 | serine carboxypeptidase                                                      |
| A_84_P15710  | At4g20110.1              | 2.421245 | vacuolar sorting receptor                                                    |
| A_84_P15734  | At4g25810.1              | 3.662312 | xyloglucan:xyloglucosyl transferase                                          |
| A_84_P15737  | At4g26370.1              | 3.572102 | antitermination NusB domain-containing protein                               |
| A_84_P15738  | At4g26590.1              | 3.092136 | oligopeptide transporter OPT family protein                                  |
| A_84_P15756  | At4g30520.1              | 2.298776 | leucine-rich repeat family protein / protein kinase family protein           |
| A_84_P15785  | At4g38210.1              | 2.320681 | expansin, putative (EXP20)                                                   |
| A_84_P15846  | At5g11250.1              | 5.324141 | disease resistance protein (TIR-NBS-LRR class)                               |
| A_84_P15851  | At5g12940.1              | 2.77291  | leucine-rich repeat family protein                                           |
| A_84_P15863  | At5g18270.1              | 4.112869 | no apical meristem (NAM) family protein contains Pfam PF02365                |
| A_84_P15872  | At1g23440.1              | 4.359406 | pyrrolidone-carboxylate peptidase family protein                             |
| A_84_P15892  | At5g36160.1              | 2.514638 | aminotransferase-related                                                     |
| A_84_P15960  | At5g55370.1              | 5.192052 | long-chain-alcohol O-fatty-acyltransferase family protein                    |
| A_84_P15965  | At5g56980.1              | 8.300782 | expressed protein non-consensus CG donor splice site at exon 1               |
| A_84_P16004  | At5g66170.1              | 4.02581  | senescence-associated family protein contains                                |
| A_84_P16079  | At1g23790.1              | 2.228042 | expressed protein                                                            |
| A_84_P16116  | CHR1:003294182-003294123 | 2.09719  | Unknown                                                                      |

|              |             |           |                                                                                        |
|--------------|-------------|-----------|----------------------------------------------------------------------------------------|
| A_84_P161343 | At5g01370.1 | 2.849005  | expressed protein                                                                      |
| A_84_P16147  | At1g20960.1 | 2.31629   | U5 small nuclear ribonucleoprotein helicase                                            |
| A_84_P16175  | At1g32930.1 | 2.078624  | galactosyltransferase family protein                                                   |
| A_84_P16180  | At1g11050.1 | 2.856061  | protein kinase family protein contains protein kinase domain                           |
| A_84_P16211  | At1g74270.1 | 2.389475  | 60S ribosomal protein L35a (RPL35aC)                                                   |
| A_84_P16215  | At1g52920.1 | 4.653535  | lanthionine synthetase C-like family protein                                           |
| A_84_P16240  | At1g19150.1 | 3.290142  | chlorophyll A-B binding protein                                                        |
| A_84_P162443 | At5g64510.1 | 2.525187  | expressed protein                                                                      |
| A_84_P16341  | At2g31360.1 | 2.402794  | delta 9 desaturase (ADS2)                                                              |
| A_84_P16400  | At2g28950.1 | 3.27357   | expansin, putative (EXP6)                                                              |
| A_84_P16420  | At3g02000.1 | 2.999137  | glutaredoxin family protein contains INTERPRO Domain IPR002109, Glutaredoxin           |
| A_84_P16444  | At3g02630.1 | 2.938005  | acyl-[acyl-carrier-protein] desaturase, putative / stearyl-ACP desaturase              |
| A_84_P16460  | At3g21180.1 | 3.017434  | calcium-transporting ATPase, plasma membrane-type, putative / Ca <sup>2+</sup> -ATPase |
| A_84_P16513  | At1g35780.1 | 2.659554  | expressed protein                                                                      |
| A_84_P16551  | At3g52400.1 | 10.243018 | syntaxin, putative (SYP122)                                                            |
| A_84_P166213 | At5g39210.1 | 3.978786  | expressed protein                                                                      |
| A_84_P16678  | At4g25420.1 | 6.554698  | gibberellin 20-oxidase identical to GI:1109695                                         |
| A_84_P16774  | At5g06140.1 | 28.994703 | phox (PX) domain-containing protein                                                    |
| A_84_P16781  | At1g06460.1 | 3.784902  | 31.2 kDa small heat shock family protein / hsp20 family protein                        |
| A_84_P16803  | At5g14700.1 | 3.395551  | cinnamoyl-CoA reductase-related                                                        |
| A_84_P16825  | At5g25490.1 | 4.088744  | zinc finger (Ran-binding) family protein contains Pfam domain                          |
| A_84_P16852  | At5g40390.1 | 2.071531  | raffinose synthase family protein                                                      |
| A_84_P168923 | At1g48330.1 | 11.720738 | expressed protein similar to hypothetical protein GI:9294146                           |
| A_84_P16923  | At5g59820.1 | 5.938615  | zinc finger (C2H2 type) family protein (ZAT12)                                         |
| A_84_P170033 | At1g72820.1 | 2.290631  | mitochondrial substrate carrier family protein                                         |
| A_84_P17007  | At3g14415.1 | 3.624184  | (S)-2-hydroxy-acid oxidase, peroxisomal                                                |
| A_84_P17009  | At1g20823.1 | 4.057147  | zinc finger (C3HC4-type RING finger) family protein                                    |
| A_84_P17024  | At1g23460.1 | 7.854588  | polygalacturonase, putative / pectinase                                                |
| A_84_P17113  | At1g22490.1 | 7.216124  | basic helix-loop-helix (bHLH) family protein                                           |
| A_84_P17188  | At1g20270.1 | 2.122768  | oxidoreductase, 2OG-Fe(II) oxygenase family protein                                    |
| A_84_P17189  | At1g25560.1 | 2.576295  | AP2 domain-containing transcription factor                                             |

|              |             |           |                                                                         |
|--------------|-------------|-----------|-------------------------------------------------------------------------|
| A_84_P17191  | At1g07160.1 | 2.679823  | protein phosphatase 2C, putative / PP2C                                 |
| A_84_P17195  | At1g19990.1 | 3.528884  | expressed protein; expression supported by MPSS [At1g19990.1]           |
| A_84_P17326  | At2g38470.1 | 18.939231 | WRKY family transcription factor                                        |
| A_84_P17343  | At2g44840.1 | 3.035171  | ethylene-responsive element-binding protein                             |
| A_84_P17348  | At2g47000.1 | 5.307195  | multidrug resistant (MDR) ABC transporter                               |
| A_84_P17364  | At3g09200.1 | 2.251852  | 60S acidic ribosomal protein P0 (RPP0B)                                 |
| A_84_P17392  | At3g16720.1 | 3.196896  | zinc finger (C3HC4-type RING finger) family protein                     |
| A_84_P17394  | At3g14240.1 | 2.015469  | subtilase family protein                                                |
| A_84_P174131 | At5g14730.1 | 24.253661 | expressed protein                                                       |
| A_84_P17453  | At3g11180.1 | 2.810068  | oxidoreductase, 2OG-Fe(II) oxygenase family protein                     |
| A_84_P17485  | At3g49530.1 | 3.382398  | no apical meristem (NAM) family protein                                 |
| A_84_P17529  | At3g59580.1 | 2.038978  | RWP-RK domain-containing protein                                        |
| A_84_P17537  | At3g61680.1 | 4.018177  | lipase class 3 family protein contains Pfam profile PF01764: Lipase     |
| A_84_P17553  | At4g01460.1 | 3.235834  | basic helix-loop-helix (bHLH) family protein                            |
| A_84_P17618  | At4g24160.1 | 2.534107  | hydrolase, alpha/beta fold family protein                               |
| A_84_P17650  | At4g31020.1 | 2.564198  | expressed protein                                                       |
| A_84_P17665  | At4g34730.1 | 2.443168  | ribosome-binding factor A family protein                                |
| A_84_P17724  | At5g07190.1 | 5.793447  | embryo-specific protein 3                                               |
| A_84_P17734  | At1g31320.1 | 4.897472  | LOB domain protein 4 / lateral organ boundaries domain protein 4 (LBD4) |
| A_84_P17796  | At5g40030.1 | 2.393171  | protein kinase                                                          |
| A_84_P17846  | At5g53850.1 | 5.469849  | haloacid dehalogenase-like hydrolase family protein                     |
| A_84_P17851  | At5g55220.1 | 2.491262  | trigger factor type chaperone family protein                            |
| A_84_P17891  | At1g51500.1 | 16.054214 | ABC transporter family protein                                          |
| A_84_P179124 | At5g05830.1 | 3.129197  | zinc finger (C3HC4-type RING finger) family protein                     |
| A_84_P17953  | At1g12420.1 | 3.374544  | ACT domain-containing protein (ACR8)                                    |
| A_84_P18010  | At1g77240.1 | 3.365427  | AMP-binding protein                                                     |
| A_84_P181054 | At3g13224.2 | 3.339818  | RNA recognition motif (RRM)-containing protein                          |
| A_84_P18113  | At1g76640.1 | 2.457007  | calmodulin-related protein                                              |
| A_84_P18174  | At1g63440.1 | 5.280903  | copper-exporting ATPase                                                 |
| A_84_P18192  | At2g20750.1 | 3.610135  | beta-expansin, putative (EXPB1)                                         |
| A_84_P18196  | At2g47730.1 | 2.406535  | glutathione S-transferase 6 (GST6)                                      |
| A_84_P18205  | At2g43180.4 | 19.659584 | expressed protein                                                       |

|              |             |           |                                                                               |
|--------------|-------------|-----------|-------------------------------------------------------------------------------|
| A_84_P18239  | At2g34700.1 | 4.261323  | pollen Ole e 1 allergen and extensin family protein                           |
| A_84_P18298  | At3g05150.1 | 2.692295  | sugar transporter family protein                                              |
| A_84_P18335  | At3g02480.1 | 3.295467  | ABA-responsive protein-related                                                |
| A_84_P18376  | At3g23730.1 | 3.276742  | xyloglucan:xyloglucosyl transferase                                           |
| A_84_P18422  | At1g48470.1 | 10.463387 | glutamine synthetase                                                          |
| A_84_P184664 | At5g26742.1 | 2.478048  | DEAD box RNA helicase (RH3)                                                   |
| A_84_P18549  | At4g20370.1 | 14.717346 | twin sister of FT protein (TSF) / TFL1 like protein                           |
| A_84_P18581  | At4g27730.1 | 2.444122  | oligopeptide transporter OPT family protein                                   |
| A_84_P18589  | At4g29510.1 | 5.491958  | protein arginine N-methyltransferase                                          |
| A_84_P185924 | At5g19340.1 | 2.46144   | expressed protein                                                             |
| A_84_P18598  | At4g31540.1 | 2.408403  | exocyst subunit EXO70 family protein tomato leucine zipper-containing protein |
| A_84_P18610  | At4g34520.1 | 2.761636  | fatty acid elongase 1 (FAE1) identical to fatty acid elongase 1               |
| A_84_P18655  | At1g62710.1 | 3.797515  | vacuolar processing enzyme beta / beta-VPE[At1g62710.1]                       |
| A_84_P18661  | At5g04660.1 | 2.988853  | cytochrome P450                                                               |
| A_84_P18741  | At5g39850.1 | 2.673554  | 40S ribosomal protein S9 (RPS9C) 40S ribosomal protein S9                     |
| A_84_P18770  | At5g47500.1 | 3.82563   | pectinesterase family protein                                                 |
| A_84_P18773  | At5g48250.1 | 2.261425  | zinc finger (B-box type) family protein                                       |
| A_84_P18810  | At5g58870.1 | 3.879933  | FtsH protease                                                                 |
| A_84_P18882  | At5g58190.1 | 2.536315  | expressed protein                                                             |
| A_84_P18886  | At1g20620.1 | 2.359555  | catalase 3 (SEN2)                                                             |
| A_84_P189364 | At3g57690.1 | 2.378359  | arabinogalactan-protein, putative (AGP23)                                     |
| A_84_P18942  | At1g62290.1 | 5.632725  | aspartyl protease family protein                                              |
| A_84_P19067  | At1g32550.1 | 2.537933  | ferredoxin family protein                                                     |
| A_84_P19108  | At1g30280.1 | 3.538714  | expressed protein                                                             |
| A_84_P19121  | At2g25760.1 | 2.261071  | protein kinase family protein                                                 |
| A_84_P19127  | At2g14860.1 | 3.499968  | peroxisomal membrane protein 22 kDa                                           |
| A_84_P19140  | At2g47590.1 | 3.123723  | photolyase/blue light photoreceptor (PHR2)                                    |
| A_84_P19142  | At2g47750.1 | 2.799556  | auxin-responsive GH3 family protein                                           |
| A_84_P19144  | At2g47640.1 | 4.257102  | small nuclear ribonucleoprotein D2                                            |
| A_84_P19163  | At2g43050.1 | 3.372747  | pectinesterase family protein contains Pfam profile: PF01095 pectinesterase   |
| A_84_P19180  | At2g28510.1 | 9.874538  | Dof-type zinc finger domain-containing protein                                |
| A_84_P19291  | At3g27620.1 | 49.010205 | alternative oxidase 1c, mitochondrial (AOX1C)                                 |

|              |                          |           |                                                                                  |
|--------------|--------------------------|-----------|----------------------------------------------------------------------------------|
| A_84_P19306  | At3g26650.1              | 2.409573  | glyceraldehyde 3-phosphate dehydrogenase A                                       |
| A_84_P19332  | At3g24650.1              | 3.166583  | abscisic acid-insensitive protein 3 (ABI3)                                       |
| A_84_P19336  | At1g34640.1              | 3.684767  | expressed protein                                                                |
| A_84_P19383  | At3g50870.1              | 2.210826  | zinc finger (GATA type) family protein                                           |
| A_84_P193944 | At5g66650.1              | 3.609733  | expressed protein contains Pfam domain, PF04678: Protein of unknown function     |
| A_84_P194044 | At5g07330.1              | 3.888993  | expressed protein                                                                |
| A_84_P19427  | At3g61160.1              | 2.347658  | shaggy-related protein kinase beta / ASK-beta (ASK2)                             |
| A_84_P19438  | At3g44880.1              | 2.566719  | Rieske [2Fe-2S] domain-containing protein                                        |
| A_84_P19485  | At4g17880.1              | 2.531919  | basic helix-loop-helix (bHLH) family protein bHLH protein                        |
| A_84_P19492  | At4g19710.1              | 2.258055  | bifunctional aspartate kinase/homoserine dehydrogenase, putative / AK-HSDH       |
| A_84_P19526  | At4g27500.1              | 3.226052  | expressed protein non-consensus GA donor splice site at exon 6                   |
| A_84_P19541  | At4g30810.1              | 15.315416 | serine carboxypeptidase S10 family protein                                       |
| A_84_P19550  | At4g33030.1              | 2.048335  | UDP-sulfoquinovose synthase                                                      |
| A_84_P195734 | At1g02890.1              | 3.356211  | AAA-type ATPase family protein contains Pfam domain, PF00004: ATPase, AAA family |
| A_84_P19594  | At4g37330.1              | 10.076337 | cytochrome P450 family protein                                                   |
| A_84_P196244 | At5g57930.1              | 4.381428  | expressed protein                                                                |
| A_84_P19628  | At5g10820.1              | 24.36563  | integral membrane transporter family protein contains 11 transmembrane domains   |
| A_84_P19658  | At5g24240.1              | 2.32807   | phosphatidylinositol 3- and 4-kinase family protein / ubiquitin family protein   |
| A_84_P19701  | At5g43810.1              | 2.01316   | pinhead protein (PINHEAD) / zwille protein (ZWILLE)                              |
| A_84_P19754  | At5g58540.1              | 4.210716  | protein kinase family protein                                                    |
| A_84_P19772  | At5g62180.1              | 7.781404  | expressed protein similar to PrMC3, Pinus radiata                                |
| A_84_P19807  | At5g20480.1              | 3.708157  | leucine-rich repeat transmembrane protein kinase                                 |
| A_84_P19923  | At1g05680.1              | 48.158767 | UDP-glucuronosyl/UDP-glucosyl transferase family protein                         |
| A_84_P19976  | At1g60960.1              | 2.461506  | metal transporter, putative (IRT3)                                               |
| A_84_P200024 | CHR2:014911845-014911786 | 2.392023  | Unknown                                                                          |
| A_84_P20023  | At1g07180.1              | 2.855705  | pyridine nucleotide-disulphide oxidoreductase family protein                     |
| A_84_P20034  | At1g79030.1              | 2.508189  | DNAJ heat shock N-terminal domain-containing protein / S-locus protein           |
| A_84_P20078  | At2g22230.1              | 2.443512  | beta-hydroxyacyl-ACP dehydratase                                                 |
| A_84_P20128  | At2g03760.1              | 45.611395 | steroid sulfotransferase                                                         |
| A_84_P20281  | At3g22910.1              | 2.692223  | calcium-transporting ATPase, plasma membrane-type, putative / Ca(2+)-ATPase      |
| A_84_P20335  | At3g52460.1              | 6.924035  | hydroxyproline-rich glycoprotein family protein                                  |



|              |                          |           |                                                                                  |
|--------------|--------------------------|-----------|----------------------------------------------------------------------------------|
| A_84_P20352  | At3g55890.1              | 2.035756  | yippee family protein                                                            |
| A_84_P20467  | At4g26470.1              | 2.14743   | calcium-binding EF hand family protein                                           |
| A_84_P20478  | At4g28880.1              | 3.603947  | casein kinase                                                                    |
| A_84_P20512  | CHR1:017801236-017801177 | 15.425499 | Unknown                                                                          |
| A_84_P205258 | At3g12150.1              | 2.12298   | expressed protein                                                                |
| A_84_P205498 | At1g63060.1              | 3.250445  | expressed protein                                                                |
| A_84_P20565  | At5g07710.1              | 3.088446  | exonuclease family protein contains exonuclease domain, Pfam:PF00929             |
| A_84_P20598  | At5g22470.1              | 3.263798  | poly (ADP-ribose) polymerase family protein                                      |
| A_84_P20604  | At5g24260.1              | 3.267443  | prolyl oligopeptidase family protein                                             |
| A_84_P20605  | At5g24530.1              | 5.293602  | oxidoreductase, 2OG-Fe(II) oxygenase family protein                              |
| A_84_P20660  | At5g47110.1              | 2.114535  | lil3 protein                                                                     |
| A_84_P20704  | At5g59320.1              | 4.993801  | lipid transfer protein 3 (LTP3)                                                  |
| A_84_P20724  | At5g63790.1              | 3.434969  | no apical meristem (NAM) family protein                                          |
| A_84_P20740  | At5g14760.1              | 2.930031  | L-aspartate oxidase family protein                                               |
| A_84_P20748  | At5g17520.1              | 4.078312  | root cap 1 (RCP1) identical to GI:6137138                                        |
| A_84_P20799  | At1g02390.1              | 2.634988  | phospholipid/glycerol acyltransferase family protein                             |
| A_84_P20880  | At1g10810.1              | 2.962376  | aldo/keto reductase family protein                                               |
| A_84_P20977  | At1g14480.1              | 2.441176  | ankyrin repeat family protein contains Pfam domain, PF00023: Ankyrin repeat      |
| A_84_P20997  | At1g32180.1              | 2.883471  | cellulose synthase family protein                                                |
| A_84_P21029  | At2g16910.1              | 2.671065  | basic helix-loop-helix (bHLH) family protein                                     |
| A_84_P21043  | At2g43230.1              | 7.699683  | serine/threonine protein kinase                                                  |
| A_84_P210958 | At5g55060.1              | 5.099757  | expressed protein                                                                |
| A_84_P211128 | At1g80240.1              | 11.489505 | expressed protein contains Pfam profile PF04862: Protein of unknown function     |
| A_84_P211628 | At2g40080.1              | 5.290505  | expressed protein                                                                |
| A_84_P21219  | At3g19580.1              | 3.054023  | zinc finger (C2H2 type) protein 2 (AZF2)                                         |
| A_84_P21308  | At1g21550.1              | 2.797288  | calcium-binding protein                                                          |
| A_84_P21312  | At3g59440.1              | 5.443256  | calcium-binding protein                                                          |
| A_84_P21364  | At4g10920.1              | 2.641074  | transcriptional coactivator p15 (PC4) family protein (KELP)                      |
| A_84_P21372  | At4g12800.1              | 2.130001  | photosystem I reaction center subunit XI, chloroplast (PSI-L) / PSI subunit V    |
| A_84_P21375  | At4g13580.1              | 2.809641  | disease resistance-responsive family protein                                     |
| A_84_P21406  | At4g25100.1              | 7.365217  | superoxide dismutase [Fe], chloroplast (SODB) / iron superoxide dismutase (FSD1) |

|              |             |           |                                                                                  |
|--------------|-------------|-----------|----------------------------------------------------------------------------------|
| A_84_P21446  | At4g34160.1 | 3.743206  | cyclin delta-3 (CYCD3)                                                           |
| A_84_P214638 | At4g22890.1 | 2.342335  | expressed protein                                                                |
| A_84_P214908 | At4g15510.1 | 2.69521   | photosystem II reaction center PsbP family protein                               |
| A_84_P21492  | At5g02370.1 | 3.744989  | kinesin motor protein-related kinesin, <i>Xenopus laevis</i> , EMBL:XLA249840    |
| A_84_P21517  | At1g31310.1 | 2.983411  | hydroxyproline-rich glycoprotein family protein                                  |
| A_84_P21528  | At1g18310.1 | 19.936066 | glycosyl hydrolase family 81 protein                                             |
| A_84_P21543  | At5g19220.1 | 3.74348   | glucose-1-phosphate adenylyltransferase large subunit 1                          |
| A_84_P21584  | At1g72210.1 | 2.62578   | basic helix-loop-helix (bHLH) family protein (bHLH096)                           |
| A_84_P21595  | At5g44360.1 | 2.342355  | FAD-binding domain-containing protein                                            |
| A_84_P21683  | At5g66940.1 | 4.63749   | Dof-type zinc finger domain-containing protein                                   |
| A_84_P21685  | At5g67450.1 | 5.059162  | zinc finger (C2H2 type) protein 1 (AZF1)                                         |
| A_84_P21773  | At1g03630.1 | 2.474052  | protochlorophyllide reductase C                                                  |
| A_84_P218458 | At1g67325.1 | 2.348295  | zinc finger (Ran-binding) family protein similar to ZIS2 [ <i>Homo sapiens</i> ] |
| A_84_P21874  | At1g27730.1 | 5.492228  | zinc finger (C2H2 type) family protein / salt-tolerance zinc finger protein      |
| A_84_P21910  | At1g12710.1 | 2.011343  | F-box family protein / SKP1 interacting partner 3-related                        |
| A_84_P21916  | At1g19250.1 | 15.60216  | flavin-containing monooxygenase family protein / FMO family protein              |
| A_84_P21924  | At1g78050.1 | 2.391516  | phosphoglycerate/bisphosphoglycerate mutase family protein                       |
| A_84_P21994  | At2g26440.1 | 3.835061  | pectinesterase family protein contains Pfam profile                              |
| A_84_P22023  | At2g21110.1 | 2.044137  | disease resistance-responsive family protein                                     |
| A_84_P22044  | At2g23560.1 | 2.824098  | hydrolase, alpha/beta fold family protein                                        |
| A_84_P22056  | At2g01770.1 | 5.423146  | integral membrane family protein contains integral membrane protein domain       |
| A_84_P220798 | At2g15300.1 | 4.208657  | leucine-rich repeat transmembrane protein kinase                                 |
| A_84_P22114  | At3g03000.1 | 2.407648  | calmodulin                                                                       |
| A_84_P22128  | At3g15690.1 | 2.467841  | biotin carboxyl carrier protein of acetyl-CoA carboxylase-related                |
| A_84_P22151  | At3g25710.1 | 6.430645  | basic helix-loop-helix (bHLH) family protein contains Pfam profile               |
| A_84_P22262  | At3g60390.1 | 2.613887  | homeobox-leucine zipper protein 3 (HAT3) / HD-ZIP protein 3                      |
| A_84_P22296  | At4g05010.1 | 2.941776  | F-box family protein contains Pfam PF00646: F-box domain                         |
| A_84_P22318  | At4g12830.1 | 2.472521  | hydrolase, alpha/beta fold family protein                                        |
| A_84_P22323  | At4g17920.1 | 2.707495  | zinc finger (C3HC4-type RING finger) family protein                              |
| A_84_P22342  | At4g22780.1 | 8.814336  | ACT domain-containing protein (ACR7)                                             |
| A_84_P22386  | At4g32540.1 | 2.957196  | flavin-containing monooxygenase / FMO (YUCCA) identical to gi:16555352           |
| A_84_P22402  | At4g36220.1 | 3.17006   | cytochrome P450 84A1 (CYP84A1) / ferulate-5-hydroxylase (FAH1)                   |

|              |             |           |                                                                                   |
|--------------|-------------|-----------|-----------------------------------------------------------------------------------|
| A_84_P224099 | At1g18330.1 | 4.695009  | myb family transcription factor contains Pfam profile                             |
| A_84_P22430  | At4g36870.1 | 10.195092 | BEL1-like homeobox 2 protein (BLH2)                                               |
| A_84_P224609 | At3g19470.1 | 3.651585  | F-box family protein contains F-box domain Pfam:PF00646                           |
| A_84_P224829 | At2g45190.1 | 2.383876  | axial regulator YABBY1/abnormal floral organs protein/filamentous flower protein  |
| A_84_P225559 | At5g64810.1 | 17.179254 | WRKY family transcription factor                                                  |
| A_84_P22568  | At5g51490.1 | 4.580338  | pectinesterase family protein contains Pfam profile: PF01095 pectinesterase       |
| A_84_P22607  | At5g61600.1 | 11.423169 | ethylene-responsive element-binding family protein                                |
| A_84_P22617  | At5g64000.1 | 2.68071   | 3'(2'),5'-bisphosphate nucleotidase,putative inositol polyphosphate 1-phosphatase |
| A_84_P22698  | At1g64460.1 | 2.067852  | phosphatidylinositol 3- and 4-kinase family protein contains Pfam profile         |
| A_84_P22718  | At1g51420.1 | 2.61118   | sucrose-phosphatase, putative similar to sucrose-phosphatase (SPP1)               |
| A_84_P22726  | At1g70170.1 | 4.557814  | matrixin family protein similar to SP P29136 Metalloendoprotease 1 precursor      |
| A_84_P227839 | At1g67050.1 | 2.244993  | expressed protein [At1g67050.1]                                                   |
| A_84_P22836  | At1g66430.1 | 4.092363  | pfkB-type carbohydrate kinase family protein contains Pfam profile                |
| A_84_P22839  | At1g73260.1 | 2.941841  | trypsin and protease inhibitor family protein / Kunitz family protein             |
| A_84_P22850  | At1g66150.1 | 2.271689  | leucine-rich repeat protein kinase, putative (TMK1)                               |
| A_84_P22890  | At1g14410.1 | 2.956914  | DNA-binding protein-related                                                       |
| A_84_P22892  | At1g73500.1 | 5.058265  | mitogen-activated protein kinase kinase (MAPKK)                                   |
| A_84_P229069 | At5g57130.1 | 2.916363  | expressed protein                                                                 |
| A_84_P22943  | At2g42250.1 | 2.996568  | cytochrome P450 family protein similar to cytochrome P450 93A1 (SP:Q42798)        |
| A_84_P22963  | At2g28800.1 | 3.418187  | chloroplast membrane protein (ALBINO3) Oxa1p homolog {PMID:11148275}              |
| A_84_P22980  | At2g17520.1 | 2.306671  | protein kinase family protein / Ire1 homolog-2 (IRE1-2)                           |
| A_84_P23025  | At2g46780.1 | 2.87449   | RNA recognition motif (RRM)-containing protein contains InterPro entry IPR000504  |
| A_84_P23171  | At3g51910.1 | 2.221245  | heat shock transcription factor family protein contains Pfam profile              |
| A_84_P23217  | At3g62720.1 | 3.800217  | galactosyl transferase GMA12/MNN10 family protein                                 |
| A_84_P232439 | At4g31800.1 | 3.10601   | WRKY family transcription factor                                                  |
| A_84_P23249  | At4g09040.1 | 2.235879  | RNA recognition motif (RRM)-containing protein                                    |
| A_84_P23277  | At4g20040.1 | 2.23029   | expressed protein C70DMY30S                                                       |
| A_84_P23308  | At4g27140.1 | 6.43036   | 2S seed storage protein 1 / 2S albumin storage protein / NWMU1-2S albumin 1       |
| A_84_P23433  | At1g49570.1 | 6.570658  | peroxidase                                                                        |
| A_84_P23481  | At5g42580.1 | 2.69246   | cytochrome P450 family protein similar to Cytochrome P450 93A1                    |
| A_84_P23502  | At5g48070.1 | 4.981149  | xyloglucan:xyloglucosyl transferase                                               |

|              |             |           |                                                                             |
|--------------|-------------|-----------|-----------------------------------------------------------------------------|
| A_84_P23513  | At5g51280.1 | 2.979749  | DEAD-box protein abstrakt, putative                                         |
| A_84_P23525  | At5g54770.1 | 2.932896  | thiazole biosynthetic enzyme, chloroplast (ARA6) (THI1) (THI4)              |
| A_84_P23535  | At5g57630.1 | 2.329919  | CBL-interacting protein kinase 21, putative (CIPK21)                        |
| A_84_P23544  | At5g59720.1 | 2.974149  | 18.1 kDa class I heat shock protein (HSP18.1-CI)                            |
| A_84_P236583 | At1g62960.1 | 3.857106  | 1-aminocyclopropane-1-carboxylate synthase, putative / ACC synthase         |
| A_84_P23690  | At1g11890.1 | 2.186404  | vesicle transport protein SEC22                                             |
| A_84_P23696  | At1g60390.1 | 3.103633  | BURP domain-containing protein / polygalacturonase                          |
| A_84_P23725  | At1g17260.1 | 2.547881  | ATPase 10, plasma membrane-type                                             |
| A_84_P23742  | At1g79600.1 | 2.192688  | ABC1 family protein contains Pfam domain, PF03109: ABC1 family              |
| A_84_P23747  | At1g10900.1 | 32.157128 | phosphatidylinositol-4-phosphate 5-kinase family protein                    |
| A_84_P23859  | At2g30250.1 | 4.126607  | WRKY family transcription factor                                            |
| A_84_P23876  | At2g40220.1 | 2.566634  | abscisic acid-insensitive 4 (ABI4)                                          |
| A_84_P23910  | At2g02380.1 | 3.131836  | glutathione S-transferase                                                   |
| A_84_P23935  | At2g37590.1 | 3.366546  | Dof-type zinc finger domain-containing protein                              |
| A_84_P23964  | At2g31980.1 | 3.452196  | cysteine proteinase inhibitor-related                                       |
| A_84_P23973  | At3g03780.2 | 3.094851  | 5-methyltetrahydropteroyltriglutamate--homocysteine methyltransferase       |
| A_84_P23980  | At3g05500.1 | 5.929947  | rubber elongation factor (REF) family protein contains Pfam profile         |
| A_84_P239935 | At1g01320.1 | 2.773267  | tetratricopeptide repeat (TPR)-containing protein                           |
| A_84_P24028  | At3g16240.1 | 5.918126  | delta tonoplast integral protein (delta-TIP)                                |
| A_84_P240415 | At5g11550.1 | 2.694285  | expressed protein                                                           |
| A_84_P24056  | At3g18280.1 | 3.975706  | protease inhibitor/seed storage/lipid transfer protein (LTP) family protein |
| A_84_P24121  | At3g52900.1 | 4.697321  | expressed protein contains Pfam profile PF04949                             |
| A_84_P24139  | At3g56500.1 | 4.681468  | serine-rich protein-related                                                 |
| A_84_P242895 | At1g66160.1 | 2.978653  | U-box domain-containing protein                                             |
| A_84_P251245 | At5g48655.1 | 2.663776  | zinc finger (C3HC4-type RING finger) family protein                         |
| A_84_P253585 | At3g26410.1 | 2.04541   | expressed protein                                                           |
| A_84_P255170 | At5g42010.1 | 2.119463  | WD-40 repeat family protein                                                 |
| A_84_P260340 | At1g76240.1 | 2.376877  | expressed protein contains Pfam profile PF03087                             |
| A_84_P267260 | At3g04630.1 | 3.125182  | expressed protein [At3g04630.1]                                             |
| A_84_P277210 | At5g23530.1 | 4.267858  | expressed protein contains similarity to PrMC3 [Pinus radiata]              |
| A_84_P277490 | At2g02930.1 | 8.451367  | glutathione S-transferase, putative                                         |
| A_84_P282380 | At1g74690.1 | 2.434686  | calmodulin-binding family protein                                           |

|              |                          |           |                                                                                 |
|--------------|--------------------------|-----------|---------------------------------------------------------------------------------|
| A_84_P287840 | At5g11000.1              | 2.702626  | expressed protein                                                               |
| A_84_P288270 | CHR2:013304966-013305025 | 2.751868  | Unknown                                                                         |
| A_84_P291094 | At1g70830.1              | 6.698662  | Bet v I allergen family protein similar to Csf-2 [ <i>Cucumis sativus</i> ]     |
| A_84_P291394 | At2g41370.1              | 2.882861  | ankyrin repeat family protein / BTB/POZ domain-containing protein               |
| A_84_P293174 | At2g02100.1              | 2.341902  | plant defensin-fusion protein                                                   |
| A_84_P293484 | At3g19800.1              | 4.565897  | expressed protein                                                               |
| A_84_P293854 | At3g06550.1              | 2.180802  | O-acetyltransferase-related                                                     |
| A_84_P294924 | At2g38920.1              | 2.070951  | SPX (SYG1/Pho81/XPR1) domain-containing protein                                 |
| A_84_P295304 | At1g60790.1              | 2.557113  | expressed protein                                                               |
| A_84_P297064 | At1g65310.1              | 2.716808  | xyloglucan:xyloglucosyl transferase                                             |
| A_84_P298474 | At1g02520.1              | 4.401019  | multidrug resistance P-glycoprotein, putative                                   |
| A_84_P299340 | At5g14690.1              | 2.616576  | expressed protein predicted protein, <i>Arabidopsis thaliana</i>                |
| A_84_P306750 | At3g09035.1              | 3.199172  | legume lectin family protein contains Pfam domain, PF00139                      |
| A_84_P307390 | At4g38170.1              | 2.085394  | far-red impaired responsive protein, putative / SWIM zinc finger family protein |
| A_84_P312043 | At2g31220.1              | 2.525293  | basic helix-loop-helix (bHLH) family protein                                    |
| A_84_P312113 | At5g20260.1              | 3.889155  | exostosin family protein contains Pfam profile                                  |
| A_84_P500331 | At2g34360.1              | 3.111271  | MATE efflux family protein                                                      |
| A_84_P508215 | At1g74750.1              | 3.5526    | pentatricopeptide (PPR) repeat-containing protein                               |
| A_84_P511284 | At4g24910.1              | 2.212704  | hypothetical protein contains Pfam profile PF04669                              |
| A_84_P514608 | At3g09032.1              | 3.785537  | expressed protein                                                               |
| A_84_P521551 | At2g01755.1              | 3.691146  | hypothetical protein                                                            |
| A_84_P522474 | At2g19320.1              | 5.447719  | expressed protein                                                               |
| A_84_P526341 | At4g22890.2              | 2.93259   | expressed protein                                                               |
| A_84_P533182 | At2g37380.1              | 2.085883  | expressed protein                                                               |
| A_84_P534390 | At4g37740.1              | 3.314491  | expressed protein identical to transcription activator GRL2                     |
| A_84_P536408 | At4g29230.1              | 2.967708  | no apical meristem (NAM) family protein                                         |
| A_84_P541443 | At4g30010.1              | 2.245197  | expressed protein                                                               |
| A_84_P543127 | At4g00895.1              | 2.221429  | ATP synthase delta chain-related contains weak similarity to Swiss-Prot         |
| A_84_P544120 | At4g32860.1              | 5.007526  | expressed protein                                                               |
| A_84_P547587 | At4g09290.1              | 2.371684  | hypothetical protein                                                            |
| A_84_P552138 | At5g11870.1              | 3.070305  | expressed protein                                                               |
| A_84_P558055 | At3g11740.1              | 11.359579 | expressed protein contains Pfam profile PF04525                                 |

|              |                          |           |                                                                          |
|--------------|--------------------------|-----------|--------------------------------------------------------------------------|
| A_84_P561502 | At2g34200.1              | 2.548342  | zinc finger (C3HC4-type RING finger) family protein                      |
| A_84_P563228 | At2g19090.1              | 3.096755  | expressed protein contains Pfam profiles                                 |
| A_84_P563616 | At4g37030.1              | 5.274421  | hypothetical protein                                                     |
| A_84_P571723 | At5g27110.1              | 4.205895  | pentatricopeptide (PPR) repeat-containing protein                        |
| A_84_P572494 | At4g28703.1              | 2.146031  | expressed protein                                                        |
| A_84_P576326 | At5g53210.1              | 25.112824 | basic helix-loop-helix (bHLH) family protein                             |
| A_84_P576539 | At1g80540.1              | 5.840132  | expressed protein ; expression supported by MPSS                         |
| A_84_P578929 | At5g57830.1              | 2.743167  | expressed protein contains Pfam profile PF04576                          |
| A_84_P579358 | At3g01516.1              | 2.748775  | expressed protein                                                        |
| A_84_P58170  | At5g67250.1              | 2.253767  | SKP1 interacting partner 2 (SKIP2)                                       |
| A_84_P600095 | At4g19645.1              | 2.608354  | expressed protein                                                        |
| A_84_P600808 | At3g15230.1              | 2.546713  | hypothetical protein                                                     |
| A_84_P604467 | At3g59680.1              | 5.737161  | expressed protein                                                        |
| A_84_P606349 | At4g28460.1              | 34.137202 | hypothetical protein                                                     |
| A_84_P609425 | At1g61200.1              | 2.186191  | homeobox-leucine zipper protein-related                                  |
| A_84_P612156 | At1g73885.1              | 2.115139  | expressed protein                                                        |
| A_84_P612355 | At3g13600.1              | 2.272021  | calmodulin-binding family protein                                        |
| A_84_P61430  | At5g38360.1              | 3.184274  | esterase/lipase/thioesterase family protein                              |
| A_84_P66354  | At1g28310.1              | 2.643693  | Dof-type zinc finger domain-containing protein                           |
| A_84_P701513 | CHR5:005274170-005274111 | 4.695502  | Unknown                                                                  |
| A_84_P705960 | CHR5:004131515-004131574 | 2.797046  | Unknown                                                                  |
| A_84_P71124  | At3g44150.1              | 2.173515  | expressed protein hypothetical proteins - Arabidopsis thaliana           |
| A_84_P71364  | At1g28100.1              | 2.105246  | expressed protein                                                        |
| A_84_P718521 | CHR4:016798979-016799038 | 2.638318  | Unknown                                                                  |
| A_84_P720423 | CHR2:015134645-015134704 | 5.876149  | Unknown                                                                  |
| A_84_P72294  | At5g11610.1              | 3.069975  | exostosin family protein contains Pfam domain, PF03016: Exostosin family |
| A_84_P72554  | At1g77400.1              | 2.289845  | expressed protein                                                        |
| A_84_P732685 | CHR3:005789137-005789196 | 2.578514  | Unknown                                                                  |
| A_84_P736417 | CHR1:005404683-005404624 | 2.538874  | Unknown                                                                  |
| A_84_P73644  | At3g59930.1              | 3.537827  | expressed protein                                                        |
| A_84_P738659 | CHR1:008032768-008032827 | 4.14771   | Unknown                                                                  |
| A_84_P93079  | At1g75240.1              | 2.106725  | zinc finger homeobox family protein / ZF-HD homeobox family protein      |

|             |             |          |                                                            |
|-------------|-------------|----------|------------------------------------------------------------|
| A_84_P94069 | At5g53160.1 | 2.620155 | expressed protein similar to unknown protein (pir  T02893) |
| A_84_P96536 | At1g13190.1 | 2.590571 | RNA recognition motif (RRM)-containing protein             |

Expression levels of *BnGRF2a*  
in different tissues of rapeseed zy036 and 51070

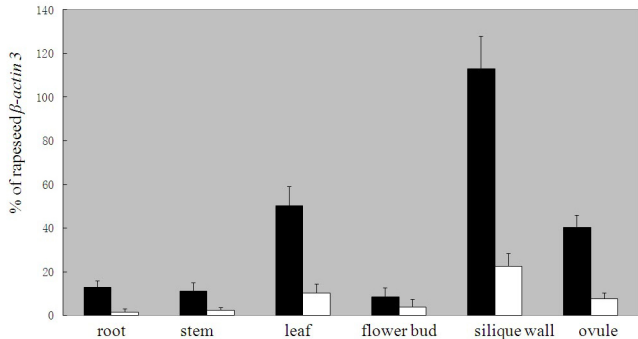

Fig. S1



|                       |       |                                                                                                                                      |     |     |     |     |     |     |     |     |     |     |     |     |     |
|-----------------------|-------|--------------------------------------------------------------------------------------------------------------------------------------|-----|-----|-----|-----|-----|-----|-----|-----|-----|-----|-----|-----|-----|
|                       | (506) | 506                                                                                                                                  | 520 | 530 | 540 | 550 | 560 | 570 | 580 | 590 | 600 | 610 | 620 | 630 | 642 |
| 35S- <i>BnGRP2a-2</i> | (506) | AAATAAATTAAGTGTATTTCAAAATTTTAATGTAACTTAGTAGTATTGTCGCTGTGCTATGATCAAACTGTATAATTAAGATCTAATAGGATCTAARAAGATTATCTAGTATCGGAAGATATTGTTTCATGG |     |     |     |     |     |     |     |     |     |     |     |     |     |
| pEarleyGate 100LB     | (1)   | -----                                                                                                                                |     |     |     |     |     |     |     |     |     |     |     |     |     |

Arabidopsis chromosome 2 sequence ← → pEarleyGate 100 LB sequence  
 ↓  
 Insertion site

|                       |       |                                                                                                                                         |     |     |     |     |     |     |     |     |     |     |     |     |     |
|-----------------------|-------|-----------------------------------------------------------------------------------------------------------------------------------------|-----|-----|-----|-----|-----|-----|-----|-----|-----|-----|-----|-----|-----|
|                       | (643) | 643                                                                                                                                     | 650 | 660 | 670 | 680 | 690 | 700 | 710 | 720 | 730 | 740 | 750 | 760 | 779 |
| 35S- <i>BnGRP2a-2</i> | (643) | TAAAATAGTTTATATAAGTCTAATTAGGATAAATGTATAAGATAAGAATTGTTTTTGTACTGACGCTTAGACAACCTTAATAACACATTGCGGACGTTTTTAATGTACTGAATTAACGCCGAATTAATTGAGCTC |     |     |     |     |     |     |     |     |     |     |     |     |     |
| pEarleyGate 100LB     | (1)   | -----GACGCTTAGACAACCTTAATAACACATTGCGGACGTTTTTAATGTACTGAATTAACGCCGAATTAATTGAGCTC                                                         |     |     |     |     |     |     |     |     |     |     |     |     |     |

|                        |       |                                                                                                                                          |     |     |     |     |     |     |     |     |     |     |     |     |     |
|------------------------|-------|------------------------------------------------------------------------------------------------------------------------------------------|-----|-----|-----|-----|-----|-----|-----|-----|-----|-----|-----|-----|-----|
|                        | (436) | 436                                                                                                                                      | 450 | 460 | 470 | 480 | 490 | 500 | 510 | 520 | 530 | 540 | 550 | 560 | 572 |
| 35S- <i>BnGRP2a-10</i> | (436) | AGAGGCTCCTCTGGCTCTTGCACCTTCAGCCACCTGTTTCCCAATTATTAACAAGGCATTATTAAGTCTATGTGTCACCAATTCCATACAAACAAAGAGGAACCTGGACTTACGGCAAGTCCAACAGCGCCAAGTC |     |     |     |     |     |     |     |     |     |     |     |     |     |
| pEarleyGate 100LB      | (1)   | -----                                                                                                                                    |     |     |     |     |     |     |     |     |     |     |     |     |     |

Arabidopsis chromosome 1 sequence ← → pEarleyGate 100 LB sequence  
 ↓  
 Insertion site

|                        |       |                                                                                                                                        |     |     |     |     |     |     |     |     |     |     |     |     |     |     |
|------------------------|-------|----------------------------------------------------------------------------------------------------------------------------------------|-----|-----|-----|-----|-----|-----|-----|-----|-----|-----|-----|-----|-----|-----|
|                        | (574) | 574                                                                                                                                    | 580 | 590 | 600 | 610 | 620 | 630 | 640 | 650 | 660 | 670 | 680 | 690 | 700 | 710 |
| 35S- <i>BnGRP2a-10</i> | (574) | AAAAATAGCGACGGTGGAGGCAGGTTGAATATCAGCCACATTCCACGCCGACCGACATGGAAATATATTGGTGTAAACAATTGACGCTTAGACAACCTTAATAACACATTGCGGACGTTTTTAATGTACTGAAT |     |     |     |     |     |     |     |     |     |     |     |     |     |     |
| pEarleyGate 100LB      | (1)   | -----ATATATTGGTGTAAACAATTGACGCTTAGACAACCTTAATAACACATTGCGGACGTTTTTAATGTACTGAAT                                                          |     |     |     |     |     |     |     |     |     |     |     |     |     |     |

Fig.S2

Expression level analysis of six genes  
in siliques of WT control and Napin-*BnGRF2a-3* transgenic line

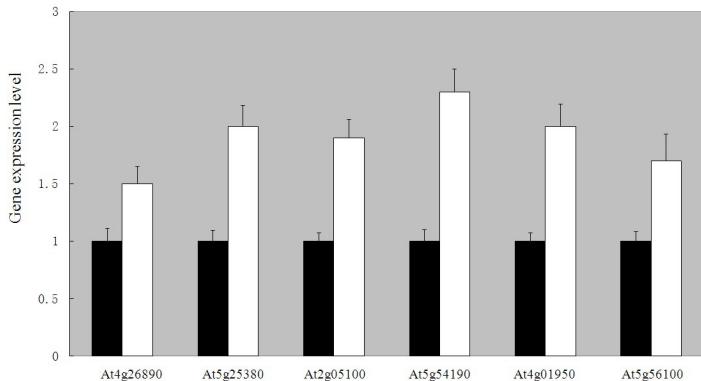

Fig.S3
